# Supplementary material for: Liquid–liquid phase separation-assisted Raman microscopy for sensitive and label-free analysis of enzymatic reactions and protein–small molecule interactions
Source: Royal Society of Chemistry journal article supplement (doi:10.1039/d5an00973a), 2025-12-11
Supplement: d5an00973a1.xlsx [file d5an00973a1.xlsx]

## Sheet: Fig. 1a
	Raman intensity
Raman shift	0 min	15 min	30 min	90 min	RNA	Rnase A
176.08	0.121843	0.131612	0.185999	0.221311	0.220232	0.259472
178.57	0.107987	0.123478	0.172742	0.207569	0.185851	0.247675
181.06	0.105126	0.116643	0.164731	0.196326	0.176246	0.229475
183.549	0.0925032	0.106141	0.148288	0.186819	0.156682	0.223871
186.038	0.0825981	0.0984758	0.143375	0.173288	0.141489	0.198704
188.526	0.0735574	0.0839517	0.134085	0.156058	0.119251	0.191853
191.013	0.0603149	0.0730919	0.122408	0.14437	0.106243	0.165439
193.5	0.0485544	0.0680244	0.113909	0.139964	0.0893483	0.168261
195.986	0.0456898	0.0602363	0.104852	0.127076	0.0605496	0.154999
198.472	0.0341752	0.0453529	0.0936445	0.112663	0.047297	0.149175
200.957	0.027973	0.042292	0.0910246	0.119231	0.048376	0.141066
203.441	0.0256007	0.0318992	0.0845851	0.106227	0.0326929	0.145794
205.925	0.0168024	0.0259983	0.0771891	0.102135	0.0136084	0.138879
208.408	0.0104747	0.0206874	0.0773463	0.0933668	0.00788374	0.12696
210.891	0.0081004	0.01573	0.0745588	0.0873139	0.00385892	0.126478
213.373	0.00103006	0.0133727	0.0642932	0.08539	-0.00235279	0.118072
215.854	0.00050784	0.0158619	0.0595131	0.0740051	-0.00856512	0.116582
218.335	0.00319758	0.0130293	0.051152	0.0692499	-0.0108914	0.0984097
220.816	0.000573519	0.0114962	0.0497875	0.0567733	-0.0100603	0.0963535
223.295	0.000296486	0.00617844	0.0441262	0.0574495	-0.00777227	0.0977339
225.774	-0.00307023	0.0014507	0.0403715	0.0533398	-0.0137441	0.0849108
228.253	-0.00260718	-0.00481524	0.0382053	0.052598	-0.0126719	0.0924842
230.731	-0.0100527	0.00487952	0.0382639	0.0434826	-0.0213171	0.0792543
233.208	-0.0151512	-0.00162515	0.0359344	0.0432799	-0.00275592	0.0776209
235.685	-0.00554652	-0.00210092	0.0266041	0.0415529	-0.0145602	0.0745041
238.161	-0.0117584	2.33783e-05	0.0294399	0.035801	-0.00790327	0.0608238
240.637	-0.0136462	-0.0108594	0.0236842	0.0330909	-0.0121783	0.0639402
243.111	-0.0192415	-0.0114567	0.020392	0.0308136	-0.0179113	0.0572132
245.586	-0.0142111	-0.0107546	0.0153479	0.0267944	-0.0204871	0.0522828
248.06	-0.0123939	-0.0134825	0.0145965	0.0225555	-0.0128608	0.053549
250.533	-0.0114423	-0.00876257	0.0146383	0.024294	0.00253837	0.0433318
253.005	-0.015681	-0.00912791	0.0117353	0.0239646	-0.00562621	0.0475512
255.477	-0.000150346	-0.00724788	0.0112958	0.0199365	-0.0067467	0.0439673
257.949	-0.00500803	-0.00891602	0.0127629	0.0174282	-0.000337286	0.04458
260.42	-0.00232908	-0.00727466	0.0133531	0.0217671	0.000727355	0.0400293
262.89	0.00405611	0.000277381	0.0117938	0.0120788	0.020982	0.0427153
265.359	0.00722807	-0.00742408	0.0105507	0.0188051	0.038564	0.0360379
267.829	0.0143534	-0.000347166	0.0133616	0.0125915	0.0354974	0.0380772
270.297	0.0202425	0.00708336	0.0104442	0.0163779	0.0501633	0.0376331
272.765	0.0245246	0.0109657	0.0163527	0.0136389	0.0553548	0.0426258
275.232	0.0202804	0.00798934	0.0115224	0.0149203	0.0624891	0.0378551
277.699	0.0223373	0.0064307	0.00979185	0.0129379	0.0696228	0.0430011
280.165	0.0161148	0.0029792	0.012513	0.0109534	0.0592659	0.0371437
282.63	0.0173055	0.00413782	0.00560882	0.00353069	0.056196	0.0355631
285.095	0.00638655	-0.00428173	0.00371308	0.00252026	0.0465667	0.0397392
287.56	0.00448697	-0.0109288	-0.00144545	-0.00599401	0.0269773	0.0311519
290.023	0.00357528	-0.0192323	-0.00254993	0.000927746	0.0229341	0.0285214
292.487	-0.00339154	-0.013585	-0.00667859	-0.00976526	0.00650155	0.0208876
294.949	-0.004428	-0.0196441	-0.0112069	-0.0135024	0.00512945	0.00665052
297.411	-0.00929547	-0.020029	-0.0139081	-0.0152847	-0.00668869	0.00809017
299.872	-0.0119394	-0.0215973	-0.0169293	-0.0198959	-0.00320346	0.0122866
302.333	-0.00791164	-0.0200925	-0.0113633	-0.014507	-0.0186664	0.0111597
304.793	-0.00907405	-0.0210717	-0.0151839	-0.0164045	-0.0234414	-0.00133047
307.253	-0.009125	-0.0193326	-0.0167796	-0.0221093	-0.000767134	-0.00718385
309.712	-0.0034927	-0.0164121	-0.0185363	-0.0249896	0.00465943	-0.0111605
312.171	0.00498092	-0.010655	-0.0209313	-0.0248278	0.00814214	-0.0197804
314.628	0.00826437	-0.011402	-0.0211015	-0.0258641	0.012596	-0.0196434
317.086	0.010188	-0.0148694	-0.0231823	-0.0317949	0.0216649	-0.0183898
319.542	0.0153237	-0.0114802	-0.0294007	-0.0317482	0.0100851	-0.0262993
321.998	0.0105739	-0.0138856	-0.0267137	-0.0298554	0.0077358	-0.0118921
324.454	0.00372294	-0.0125085	-0.0257782	-0.0300304	-0.0150192	-0.018808
326.909	-0.00288148	-0.0140883	-0.0231746	-0.0310773	-0.0139686	-0.0246072
329.363	0.00521736	-0.0153144	-0.0208911	-0.0318001	-0.0153477	-0.0276096
331.817	-0.007937	-0.0152409	-0.0247335	-0.0319815	-0.0169702	-0.0290952
334.27	-0.0163966	-0.0269921	-0.029214	-0.0355352	-0.0477434	-0.0343839
336.723	-0.0212735	-0.0232554	-0.0267773	-0.0353946	-0.0445085	-0.0355158
339.175	-0.021332	-0.0266139	-0.0330909	-0.039931	-0.0577925	-0.0331709
341.626	-0.0325117	-0.0410876	-0.0346346	-0.043491	-0.0543155	-0.0474692
344.077	-0.0325714	-0.0419651	-0.0360212	-0.0498798	-0.0863052	-0.0480906
346.527	-0.0290483	-0.0389419	-0.0414659	-0.0457248	-0.0716549	-0.0537552
348.977	-0.0258966	-0.0337915	-0.0421406	-0.0499434	-0.0589485	-0.055743
351.426	-0.0218804	-0.0312433	-0.0367728	-0.0505763	-0.0639755	-0.0558539
353.874	-0.0230545	-0.0279866	-0.037849	-0.0492543	-0.0612296	-0.0639279
356.322	-0.0113786	-0.0171639	-0.0445738	-0.048043	-0.0565408	-0.0657251
358.769	-0.00995898	-0.0180475	-0.042075	-0.0521611	-0.0455366	-0.0692454
361.216	-0.00841634	-0.0214151	-0.039419	-0.0599777	-0.0410916	-0.0726488
363.662	-0.000572612	-0.019936	-0.042332	-0.0564895	-0.03689	-0.0716954
366.108	-0.0117579	-0.0212956	-0.0438155	-0.0563737	-0.0479927	-0.070945
368.552	-0.00428602	-0.0205279	-0.0398927	-0.050389	-0.0418485	-0.0617178
370.997	-0.00842946	-0.0184606	-0.0388349	-0.0491901	-0.0308465	-0.0597736
373.441	-0.00985509	-0.0163943	-0.0341206	-0.044188	-0.0293187	-0.0574326
375.884	-0.0111577	-0.0138561	-0.0271813	-0.0413623	-0.0200179	-0.0486547
378.326	-0.00517075	-0.0110824	-0.028038	-0.0335375	-0.0187339	-0.0494398
380.768	-0.00363256	-0.00452607	-0.0259539	-0.0284327	-0.00749058	-0.044948
383.21	-0.000735735	0.00226571	-0.0231559	-0.0247433	0.0185703	-0.0424993
385.651	0.00747369	0.0013712	-0.0178943	-0.0234478	0.0234969	-0.0316937
388.091	0.0137056	0.00804279	-0.0116802	-0.0134567	0.0313381	-0.0417711
390.53	0.0115347	0.0161322	-0.00729718	-0.00933842	0.0637137	-0.0322116
392.97	0.0183833	0.0231566	-0.00132541	-0.00163442	0.0698536	-0.0260551
395.408	0.0285676	0.0292341	0.00384918	0.00487166	0.0786653	-0.0257017
397.846	0.0320789	0.0325912	0.0114078	0.0125717	0.0928207	-0.0136713
400.283	0.0410265	0.047298	0.0199986	0.022879	0.112563	-0.015844
402.72	0.0461431	0.0524267	0.0239746	0.0310099	0.144694	-0.00477964
405.156	0.0507649	0.0521156	0.0310505	0.0385952	0.154475	0.00788165
407.592	0.0609464	0.062563	0.0356592	0.0466135	0.167658	0.0120599
410.027	0.0658142	0.0637871	0.0420952	0.0485414	0.197601	0.0153552
412.461	0.0693224	0.0756514	0.0472568	0.0592737	0.199122	0.0290874
414.895	0.076784	0.079593	0.0563137	0.069243	0.196028	0.0336967
417.328	0.0801675	0.0810507	0.0605173	0.0734482	0.219168	0.0360629
419.761	0.0918291	0.0855816	0.0585157	0.0730852	0.229676	0.0277462
422.193	0.0936053	0.0936586	0.0650221	0.0733726	0.231196	0.0262265
424.624	0.0979757	0.0998429	0.0677091	0.0715923	0.247534	0.0365038
427.055	0.110871	0.100587	0.0641114	0.0708974	0.25464	0.0268981
429.486	0.113264	0.10405	0.0712486	0.0717225	0.253486	0.0291694
431.915	0.11096	0.101719	0.065659	0.0788514	0.26375	0.0348778
434.344	0.106926	0.103643	0.0664301	0.0793466	0.255065	0.0321032
436.773	0.0999265	0.0978808	0.0659269	0.0787525	0.241765	0.0236457
439.201	0.0999692	0.092827	0.0664558	0.0770694	0.224335	0.0230652
441.628	0.0909913	0.0961671	0.0630064	0.0721228	0.223179	0.0241218
444.055	0.0852255	0.0859092	0.0624978	0.068044	0.20842	0.0226555
446.481	0.0716748	0.0858186	0.0638961	0.0740742	0.198034	0.0251862
448.907	0.0727038	0.0853724	0.0652927	0.065534	0.186918	0.019314
451.332	0.0636003	0.0765306	0.0626315	0.0622105	0.178474	0.0234788
453.757	0.0559791	0.0731267	0.0636268	0.0710618	0.161284	0.0227208
456.18	0.0488515	0.0709042	0.0579398	0.065995	0.162556	0.0228398
458.604	0.0483958	0.0665525	0.0615562	0.0682105	0.145123	0.020756
461.026	0.0494224	0.0692941	0.0602399	0.068141	0.153196	0.0221492
463.449	0.0415519	0.0596201	0.0620235	0.0692656	0.139649	0.0210996
465.87	0.0383764	0.0610593	0.0608627	0.0666918	0.140191	0.032167
468.291	0.0431082	0.0575317	0.0609727	0.0688998	0.133931	0.0259116
470.712	0.037584	0.0512838	0.0633873	0.0746937	0.129857	0.0204533
473.131	0.0419442	0.0630068	0.0587219	0.0720055	0.130398	0.0307121
475.551	0.0422263	0.0631418	0.0696428	0.0738817	0.13604	0.0294481
477.969	0.0389247	0.0593741	0.0675189	0.0805398	0.125892	0.0261012
480.387	0.0361168	0.0610444	0.0718353	0.0834995	0.137363	0.0371914
482.805	0.0413399	0.0627139	0.071219	0.0821086	0.135474	0.0331988
485.222	0.044462	0.0614265	0.0715553	0.0773455	0.137957	0.0371233
487.638	0.0415291	0.0661683	0.0675953	0.0859531	0.152099	0.042685
490.054	0.0520639	0.0697268	0.0709504	0.09021	0.145108	0.0485639
492.469	0.0507363	0.0756492	0.0782803	0.0901163	0.151962	0.0504799
494.884	0.0639885	0.0808613	0.0865629	0.090347	0.174849	0.0507131
497.298	0.0709386	0.0863089	0.083948	0.0987298	0.215226	0.0515035
499.711	0.0856726	0.103343	0.0870577	0.100805	0.215521	0.0590111
502.124	0.0945986	0.104887	0.0913585	0.104401	0.249581	0.0582759
504.536	0.0989525	0.114116	0.102975	0.116257	0.263236	0.0767378
506.948	0.0923088	0.113412	0.107352	0.124415	0.238266	0.100997
509.359	0.0818343	0.106677	0.122384	0.146052	0.2269	0.117533
511.769	0.0774138	0.104907	0.125167	0.155077	0.219905	0.139667
514.179	0.0686681	0.0956871	0.127471	0.148661	0.20198	0.140998
516.589	0.0662237	0.090132	0.121025	0.141591	0.214661	0.137686
518.997	0.0627902	0.0871772	0.108374	0.129301	0.214954	0.125811
521.406	0.0666465	0.0816203	0.0979484	0.109398	0.215975	0.103774
523.813	0.0634592	0.0864673	0.0944401	0.10428	0.22647	0.0971332
526.22	0.0674381	0.0751152	0.0834542	0.104705	0.227976	0.0930102
528.627	0.0693159	0.0754676	0.0859073	0.10067	0.231183	0.0832444
531.033	0.0802133	0.0835045	0.0787356	0.0995689	0.256252	0.0859559
533.438	0.0854264	0.0799534	0.0809468	0.0993359	0.247069	0.0777846
535.843	0.0864379	0.0830227	0.0834745	0.103124	0.252218	0.0854106
538.247	0.0860898	0.0884558	0.0828989	0.0944069	0.252752	0.0788739
540.65	0.0832699	0.0880946	0.0812876	0.0956907	0.258144	0.0840544
543.053	0.0821795	0.0841854	0.0795953	0.0909931	0.253332	0.0747522
545.456	0.084919	0.0828767	0.0791737	0.0890117	0.264311	0.0739674
547.858	0.0827156	0.0842865	0.076126	0.0855065	0.274074	0.0684997
550.259	0.0970691	0.0852225	0.0733153	0.0898274	0.266833	0.0666294
552.66	0.102649	0.0881678	0.0767858	0.086971	0.278054	0.0634764
555.06	0.106499	0.0964328	0.0723017	0.0911797	0.297047	0.0682407
557.459	0.103552	0.087671	0.0726673	0.0846233	0.288591	0.0628823
559.858	0.0999875	0.0870667	0.0712816	0.0862193	0.288637	0.0616012
562.256	0.0945687	0.0897722	0.0713258	0.0840083	0.29184	0.0500375
564.654	0.101876	0.0871563	0.0752654	0.076577	0.268322	0.0519511
567.051	0.107207	0.0918701	0.0691825	0.0790375	0.271039	0.052782
569.448	0.105988	0.0970561	0.0735166	0.0793219	0.289303	0.0384502
571.844	0.115518	0.0995219	0.076338	0.0852581	0.287161	0.0427558
574.24	0.123195	0.112983	0.0805893	0.0905402	0.315141	0.0386187
576.634	0.132971	0.128098	0.0890541	0.0935374	0.318586	0.036199
579.029	0.128291	0.129261	0.0916321	0.0956632	0.338064	0.0323766
581.422	0.123116	0.130423	0.0961968	0.0993094	0.32669	0.0323116
583.816	0.121029	0.124726	0.0852513	0.0906686	0.3056	0.040044
586.208	0.114494	0.108979	0.081303	0.0816999	0.269934	0.0246137
588.6	0.109565	0.0942951	0.0713087	0.0772958	0.273621	0.0251408
590.992	0.0945029	0.0948627	0.0695046	0.0712591	0.256174	0.0302653
593.382	0.0979749	0.090109	0.0630065	0.0695696	0.250144	0.0271872
595.773	0.109354	0.10309	0.0662096	0.0715749	0.284195	0.0207865
598.162	0.117644	0.0963244	0.0628896	0.079993	0.288367	0.0279831
600.552	0.113084	0.0971254	0.0609997	0.0677526	0.28841	0.0302172
602.94	0.0934478	0.0842102	0.0583128	0.0681221	0.259787	0.0278887
605.328	0.0790012	0.0679836	0.055863	0.0632714	0.232379	0.0361576
607.715	0.0691259	0.065117	0.0605694	0.0686386	0.193068	0.0355039
610.102	0.0588796	0.0669789	0.0601843	0.0718299	0.201612	0.0367276
612.488	0.0585177	0.0618642	0.0587637	0.0705619	0.187321	0.0359888
614.874	0.0649513	0.0657347	0.0650561	0.0807079	0.177646	0.0462474
617.259	0.0663185	0.0725602	0.0712674	0.0913959	0.184732	0.0607034
619.644	0.0773231	0.0743009	0.0842373	0.0976247	0.218295	0.0724369
622.028	0.0847439	0.0890467	0.0875824	0.0970025	0.228053	0.0719278
624.411	0.109216	0.100008	0.0801893	0.0994228	0.24194	0.0543362
626.794	0.124667	0.105294	0.0797139	0.093905	0.280605	0.049702
629.176	0.136288	0.10443	0.0855994	0.086646	0.304694	0.0528253
631.558	0.13098	0.111369	0.0848028	0.0934102	0.293074	0.0547061
633.939	0.125919	0.106839	0.0949799	0.101586	0.286312	0.0650243
636.319	0.112332	0.107983	0.0942598	0.117154	0.290968	0.08282
638.699	0.104923	0.0922189	0.11358	0.139351	0.249954	0.117653
641.078	0.106657	0.104949	0.128206	0.156655	0.267484	0.153444
643.457	0.106537	0.11082	0.140286	0.175044	0.262665	0.158552
645.835	0.0966546	0.108887	0.129539	0.150487	0.276065	0.133378
648.213	0.0912205	0.0954847	0.12396	0.148217	0.242096	0.136641
650.59	0.0839326	0.0885844	0.124742	0.147684	0.236548	0.144462
652.966	0.0814632	0.0957534	0.132998	0.154651	0.221283	0.15056
655.342	0.0873956	0.0994928	0.134175	0.157268	0.228367	0.144816
657.718	0.0911034	0.102522	0.136782	0.165971	0.223304	0.136069
660.092	0.115075	0.121394	0.139625	0.161518	0.269012	0.121399
662.466	0.138305	0.1554	0.144854	0.165435	0.324436	0.114408
664.84	0.185505	0.201583	0.159624	0.170655	0.398322	0.109774
667.213	0.220843	0.226483	0.172484	0.18044	0.459333	0.110057
669.585	0.22875	0.241569	0.174129	0.178481	0.464715	0.101778
671.957	0.208732	0.218582	0.160582	0.178369	0.439732	0.0983364
674.329	0.166472	0.180342	0.152919	0.160751	0.343818	0.0970924
676.699	0.125077	0.144466	0.142789	0.153134	0.296729	0.091726
679.069	0.108888	0.133537	0.133055	0.145842	0.249398	0.0897971
681.439	0.096158	0.120361	0.128092	0.142353	0.257209	0.0870658
683.808	0.10258	0.131895	0.128694	0.141799	0.23757	0.0832121
686.176	0.0918263	0.126521	0.129692	0.146243	0.253155	0.083356
688.544	0.0975061	0.124338	0.124724	0.138619	0.227686	0.0818574
690.912	0.0946597	0.12251	0.121505	0.133602	0.224322	0.0807165
693.278	0.096879	0.113232	0.115659	0.125431	0.240878	0.0843331
695.644	0.0963795	0.114358	0.109892	0.122694	0.223425	0.0778274
698.01	0.0934085	0.103897	0.1046	0.111367	0.235608	0.0847192
700.375	0.102423	0.103129	0.104079	0.117107	0.230787	0.0812887
702.739	0.106988	0.115249	0.103159	0.116975	0.251715	0.0857757
705.103	0.123786	0.11519	0.10852	0.124234	0.277259	0.0866604
707.466	0.13008	0.127072	0.112289	0.127143	0.289927	0.0851027
709.829	0.151078	0.140846	0.115977	0.126789	0.333204	0.0932627
712.191	0.161079	0.15249	0.124515	0.141002	0.340528	0.10326
714.553	0.175157	0.173947	0.130825	0.149017	0.359756	0.0974155
716.914	0.198378	0.187955	0.146518	0.163335	0.412749	0.114968
719.274	0.223822	0.213549	0.157279	0.17613	0.472057	0.129839
721.634	0.258287	0.212539	0.165334	0.1799	0.511447	0.130187
723.993	0.269398	0.222406	0.160663	0.184321	0.548164	0.130013
726.352	0.272353	0.214301	0.154718	0.166344	0.549415	0.112316
728.71	0.240711	0.184913	0.138751	0.156302	0.496981	0.104257
731.068	0.192882	0.153514	0.121192	0.133756	0.425356	0.100116
733.425	0.148759	0.125188	0.11063	0.117731	0.337699	0.0968927
735.781	0.121688	0.102774	0.103327	0.118013	0.266074	0.102027
738.137	0.0999289	0.0883987	0.0950692	0.112205	0.239389	0.0981188
740.492	0.0953449	0.0851371	0.10025	0.110419	0.21149	0.0954483
742.847	0.0860652	0.0832938	0.0970793	0.114284	0.206182	0.101096
745.201	0.0888942	0.0888986	0.0968496	0.107711	0.19893	0.10278
747.554	0.095059	0.0907192	0.100675	0.113204	0.224959	0.0995431
749.907	0.113703	0.0940762	0.095193	0.109889	0.246129	0.108223
752.26	0.120856	0.105118	0.0982995	0.115597	0.258554	0.103942
754.612	0.125166	0.104217	0.098462	0.111954	0.27608	0.107617
756.963	0.133924	0.10639	0.101804	0.113636	0.277817	0.105731
759.314	0.133539	0.110336	0.103873	0.115534	0.276638	0.0975221
761.664	0.134512	0.112507	0.103634	0.118736	0.296836	0.102031
764.013	0.154019	0.11586	0.104188	0.110303	0.31582	0.107418
766.362	0.159316	0.124651	0.102992	0.120677	0.339662	0.101322
768.711	0.17252	0.129659	0.109906	0.121808	0.372492	0.102264
771.059	0.193633	0.149918	0.11674	0.129897	0.403379	0.0990443
773.406	0.243164	0.191222	0.137331	0.150377	0.514429	0.100582
775.753	0.334829	0.258064	0.151956	0.164442	0.670662	0.106157
778.099	0.497666	0.369836	0.185508	0.194596	0.936694	0.102691
780.444	0.680766	0.476523	0.19854	0.194199	1.25131	0.112342
782.789	0.776632	0.505173	0.195505	0.190756	1.43596	0.11623
785.134	0.740656	0.478489	0.181573	0.179049	1.38839	0.117677
787.478	0.633756	0.400371	0.173684	0.164513	1.22688	0.130681
789.821	0.511164	0.322489	0.156012	0.158565	1.02044	0.126083
792.164	0.404881	0.265771	0.152813	0.153051	0.840471	0.149523
794.506	0.340361	0.240148	0.158202	0.167757	0.738724	0.159601
796.847	0.317606	0.227176	0.158101	0.166915	0.708882	0.174997
799.188	0.312025	0.235249	0.168737	0.175095	0.725922	0.19207
801.529	0.345983	0.250653	0.175156	0.185883	0.757538	0.205821
803.869	0.391803	0.296915	0.187299	0.195692	0.844782	0.20741
806.208	0.460729	0.33419	0.202464	0.202454	0.941985	0.223837
808.547	0.523847	0.386245	0.20697	0.216174	1.05425	0.224821
810.885	0.569913	0.408858	0.213464	0.21054	1.10506	0.224884
813.223	0.5626	0.404513	0.214229	0.21295	1.10704	0.222544
815.56	0.5176	0.360203	0.210063	0.209052	1.0274	0.226082
817.896	0.443934	0.321805	0.203111	0.20635	0.916418	0.236898
820.232	0.376693	0.284943	0.20276	0.212126	0.819287	0.249472
822.567	0.313158	0.243942	0.203441	0.221815	0.725556	0.290284
824.902	0.271123	0.213937	0.215335	0.242048	0.649316	0.317213
827.236	0.232053	0.197055	0.23184	0.262823	0.598583	0.35422
829.57	0.193476	0.183247	0.238959	0.275008	0.529145	0.376106
831.903	0.168862	0.163763	0.237249	0.279365	0.509262	0.392869
834.236	0.158334	0.155392	0.23347	0.262845	0.475776	0.38979
836.567	0.137673	0.149031	0.227702	0.258392	0.457108	0.369428
838.899	0.145555	0.148699	0.222409	0.249263	0.463704	0.361065
841.23	0.1501	0.147658	0.218388	0.245895	0.460097	0.35918
843.56	0.152545	0.154064	0.225261	0.245243	0.502888	0.363092
845.89	0.162403	0.163308	0.232928	0.262094	0.518957	0.379843
848.219	0.167688	0.169713	0.243776	0.279379	0.526282	0.397631
850.547	0.179275	0.172689	0.253747	0.28916	0.532635	0.417457
852.875	0.168374	0.175665	0.262524	0.291656	0.5283	0.410641
855.203	0.170446	0.179704	0.253485	0.282844	0.503802	0.408023
857.529	0.181044	0.1906	0.245717	0.278271	0.507969	0.375083
859.856	0.17459	0.175602	0.223473	0.252061	0.488816	0.341421
862.181	0.182715	0.17621	0.210056	0.234874	0.484481	0.305237
864.507	0.174531	0.180483	0.202125	0.229209	0.461685	0.283251
866.831	0.172524	0.18381	0.206521	0.232567	0.452977	0.268103
869.155	0.173112	0.17614	0.198111	0.237446	0.43844	0.263312
871.479	0.17061	0.17852	0.2099	0.249391	0.414672	0.2756
873.802	0.153775	0.165883	0.208009	0.241329	0.425398	0.278245
876.124	0.154238	0.179021	0.215422	0.246639	0.404303	0.296809
878.446	0.153589	0.170049	0.22514	0.254884	0.414786	0.31081
880.767	0.15121	0.166869	0.227301	0.269541	0.40778	0.32781
883.087	0.14846	0.162743	0.235426	0.274521	0.399559	0.349687
885.407	0.137801	0.156843	0.245697	0.288632	0.368747	0.363282
887.727	0.131961	0.159456	0.246264	0.297197	0.371944	0.376476
890.046	0.117966	0.150008	0.253431	0.303587	0.36178	0.380827
892.364	0.119416	0.152619	0.26171	0.307801	0.340685	0.378256
894.682	0.111351	0.149554	0.255116	0.303099	0.323719	0.381724
896.999	0.101803	0.147199	0.256395	0.29883	0.300438	0.380469
899.316	0.106465	0.146734	0.267772	0.305432	0.307765	0.374892
901.632	0.102847	0.143668	0.263481	0.293659	0.290314	0.393073
903.948	0.0998472	0.141074	0.254575	0.300042	0.296669	0.362333
906.263	0.112663	0.15054	0.250838	0.29131	0.29598	0.35171
908.577	0.12276	0.147709	0.241931	0.274642	0.315453	0.322685
910.891	0.139158	0.152562	0.235885	0.258189	0.339299	0.306379
913.204	0.148637	0.158007	0.225385	0.262718	0.353428	0.30783
915.517	0.150208	0.168416	0.227926	0.262462	0.352011	0.312439
917.829	0.148071	0.155415	0.228319	0.264271	0.33116	0.318767
920.141	0.125546	0.147615	0.228313	0.267057	0.303751	0.321212
922.452	0.101539	0.13142	0.229419	0.267124	0.258365	0.331216
924.762	0.0840797	0.11416	0.223208	0.261536	0.229984	0.342857
927.072	0.0671146	0.113808	0.218268	0.259317	0.196259	0.342777
929.381	0.0538561	0.0958375	0.221995	0.258619	0.180268	0.361215
931.69	0.0466518	0.0901634	0.232959	0.268357	0.162333	0.36405
933.998	0.0474788	0.0999777	0.236763	0.272549	0.167961	0.367764
936.306	0.050406	0.0964308	0.23158	0.271195	0.157314	0.365276
938.613	0.0401119	0.0917011	0.234587	0.278647	0.171931	0.376466
940.92	0.0337715	0.0856703	0.222562	0.266853	0.167357	0.357734
943.226	0.040652	0.0900437	0.223101	0.262669	0.142378	0.3468
945.531	0.0396242	0.0889778	0.219027	0.256418	0.174971	0.357784
947.836	0.0373606	0.0817631	0.219564	0.266474	0.169912	0.356846
950.14	0.0402863	0.0868445	0.219146	0.267288	0.185015	0.354467
952.444	0.0407405	0.0886147	0.221351	0.262882	0.177284	0.355005
954.747	0.0500909	0.0882562	0.22952	0.262823	0.190687	0.349422
957.05	0.058329	0.0996026	0.226156	0.277549	0.205548	0.364476
959.352	0.0613772	0.102081	0.225256	0.269878	0.22551	0.359769
961.653	0.065043	0.107751	0.234535	0.277318	0.238185	0.37054
963.954	0.0855129	0.119096	0.236337	0.283126	0.274424	0.365509
966.254	0.109195	0.135643	0.24283	0.280561	0.309447	0.369836
968.554	0.119409	0.138946	0.240972	0.288541	0.337427	0.371521
970.853	0.133329	0.152773	0.241021	0.288365	0.378767	0.375765
973.152	0.146385	0.156076	0.246079	0.306563	0.421564	0.393726
975.45	0.146342	0.161861	0.255988	0.304319	0.438613	0.437326
977.748	0.143087	0.169893	0.258976	0.328494	0.453961	0.467124
980.045	0.142302	0.163499	0.275007	0.342448	0.501132	0.48548
982.341	0.139788	0.163253	0.280379	0.351508	0.501906	0.503634
984.637	0.142833	0.168682	0.290601	0.364916	0.524056	0.508826
986.932	0.142419	0.158976	0.283326	0.360384	0.53479	0.500057
989.227	0.14497	0.164995	0.294103	0.372267	0.553783	0.500805
991.521	0.157282	0.174679	0.290961	0.364037	0.547027	0.485912
993.815	0.165145	0.174785	0.289409	0.361785	0.529825	0.486177
996.108	0.173132	0.178675	0.307341	0.380406	0.518697	0.52912
998.401	0.173581	0.190722	0.352471	0.43262	0.497609	0.607501
1000.69	0.161921	0.196739	0.398873	0.474287	0.444942	0.658401
1002.98	0.159528	0.2011	0.392783	0.456157	0.413652	0.588299
1005.27	0.147003	0.176374	0.324181	0.372577	0.382119	0.475434
1007.56	0.129287	0.15827	0.278721	0.322699	0.340141	0.412289
1009.85	0.129365	0.160974	0.272946	0.307393	0.316868	0.386901
1012.14	0.121287	0.145943	0.256275	0.302523	0.307685	0.374951
1014.43	0.117781	0.14971	0.250975	0.295477	0.299716	0.34888
1016.72	0.107231	0.149339	0.245436	0.278537	0.309966	0.333887
1019.01	0.118058	0.143174	0.23743	0.274751	0.297869	0.315972
1021.29	0.116404	0.142802	0.233241	0.265854	0.304962	0.315375
1023.58	0.117098	0.133089	0.238276	0.274459	0.310597	0.342577
1025.87	0.115073	0.147023	0.242515	0.279476	0.312103	0.367697
1028.15	0.114655	0.145467	0.254229	0.307649	0.314339	0.393455
1030.44	0.117572	0.150532	0.270634	0.315599	0.338437	0.410651
1032.72	0.125679	0.15536	0.271132	0.305066	0.335814	0.388606
1035	0.132673	0.152621	0.268288	0.297032	0.333678	0.375039
1037.29	0.15746	0.175065	0.26433	0.306501	0.373323	0.37343
1039.57	0.171003	0.184503	0.270154	0.30912	0.418799	0.381379
1041.85	0.184051	0.186374	0.267864	0.306845	0.439498	0.376006
1044.13	0.196481	0.202196	0.266687	0.309679	0.452666	0.378912
1046.41	0.185558	0.189523	0.270519	0.309468	0.439842	0.384376
1048.69	0.176983	0.195176	0.274589	0.313931	0.426776	0.390839
1050.97	0.16989	0.183447	0.276431	0.315348	0.421483	0.388219
1053.25	0.169839	0.183661	0.283282	0.32481	0.41619	0.399478
1055.53	0.181156	0.186238	0.286872	0.328726	0.428631	0.411496
1057.81	0.168379	0.194017	0.284018	0.329814	0.411436	0.413711
1060.09	0.17673	0.196003	0.29198	0.334924	0.424849	0.419005
1062.36	0.173837	0.192313	0.293022	0.333401	0.436562	0.414617
1064.64	0.177863	0.197371	0.293267	0.3384	0.436372	0.419747
1066.92	0.181271	0.203967	0.295898	0.334592	0.452457	0.411436
1069.19	0.185173	0.211508	0.300197	0.345895	0.447652	0.413323
1071.47	0.201926	0.219167	0.30378	0.345673	0.480743	0.419448
1073.74	0.21423	0.238175	0.311577	0.355669	0.509947	0.423812
1076.01	0.232835	0.247607	0.320327	0.366099	0.513888	0.429094
1078.29	0.243286	0.260112	0.325975	0.370766	0.554267	0.431774
1080.56	0.267327	0.269543	0.326929	0.373693	0.573755	0.429813
1082.83	0.293099	0.285003	0.337267	0.373139	0.601746	0.42001
1085.1	0.316522	0.301527	0.332573	0.372476	0.654029	0.420725
1087.37	0.345629	0.322071	0.335354	0.366593	0.675704	0.402279
1089.64	0.36967	0.33682	0.330101	0.377017	0.740377	0.400311
1091.91	0.392599	0.361147	0.33447	0.367327	0.777114	0.385061
1094.18	0.430849	0.381335	0.338521	0.373183	0.831098	0.39161
1096.45	0.45526	0.390644	0.331356	0.369688	0.84573	0.388597
1098.72	0.473493	0.393332	0.338745	0.372715	0.892427	0.408142
1100.99	0.455399	0.382778	0.330227	0.370197	0.875723	0.427046
1103.25	0.418646	0.342309	0.327354	0.368439	0.830841	0.444468
1105.52	0.356316	0.299002	0.311279	0.349393	0.745391	0.439848
1107.78	0.295716	0.260543	0.298861	0.339261	0.63565	0.425387
1110.05	0.235115	0.218772	0.281749	0.319452	0.548015	0.407885
1112.31	0.208123	0.19119	0.276487	0.309971	0.490016	0.4045
1114.58	0.172729	0.181106	0.257227	0.29614	0.459467	0.389194
1116.84	0.164641	0.175514	0.253474	0.291006	0.418473	0.371127
1119.1	0.152847	0.15869	0.255446	0.289676	0.404444	0.375737
1121.37	0.154397	0.153571	0.254157	0.290954	0.397216	0.387107
1123.63	0.151746	0.159211	0.257002	0.293427	0.414524	0.390754
1125.89	0.148724	0.160357	0.255632	0.293507	0.41337	0.38652
1128.15	0.153486	0.157365	0.251954	0.284781	0.421933	0.370245
1130.41	0.151946	0.160757	0.238413	0.263006	0.431225	0.369488
1132.67	0.157079	0.158356	0.227814	0.250799	0.456793	0.349369
1134.93	0.157886	0.154535	0.220952	0.249462	0.438636	0.341529
1137.19	0.152145	0.150714	0.211863	0.234752	0.453273	0.339727
1139.45	0.148751	0.150203	0.20818	0.227108	0.440947	0.326843
1141.7	0.149806	0.141652	0.205292	0.225768	0.432265	0.315398
1143.96	0.146906	0.141731	0.198745	0.225297	0.41921	0.315392
1146.22	0.1445	0.14583	0.197923	0.223521	0.410286	0.311624
1148.47	0.146295	0.149811	0.203622	0.229898	0.40209	0.293574
1150.73	0.145495	0.149416	0.198106	0.236926	0.409442	0.296483
1152.98	0.151985	0.152332	0.210801	0.241236	0.385943	0.29483
1155.24	0.149702	0.157258	0.207749	0.233803	0.376534	0.282016
1157.49	0.155327	0.156862	0.200322	0.228652	0.369555	0.26948
1159.74	0.144889	0.151855	0.191939	0.219586	0.348972	0.252262
1162	0.143717	0.141645	0.186498	0.221282	0.309442	0.249763
1164.25	0.137356	0.140776	0.192031	0.222326	0.312423	0.264383
1166.5	0.134331	0.143808	0.203052	0.233153	0.309818	0.266681
1168.75	0.145515	0.151096	0.215105	0.256917	0.319358	0.288458
1171	0.160653	0.158384	0.23861	0.2747	0.342989	0.315913
1173.25	0.181352	0.186954	0.249548	0.291504	0.367105	0.320006
1175.5	0.194636	0.201098	0.256191	0.296349	0.402882	0.327178
1177.75	0.209897	0.212169	0.262356	0.303584	0.438902	0.325709
1180	0.212925	0.201956	0.261918	0.301142	0.413222	0.322398
1182.24	0.203721	0.200493	0.252255	0.27989	0.420092	0.316485
1184.49	0.177465	0.181057	0.237261	0.274838	0.405829	0.302131
1186.74	0.169867	0.164577	0.232607	0.271958	0.373834	0.302135
1188.98	0.162392	0.163113	0.234313	0.264294	0.353499	0.314418
1191.23	0.156523	0.155027	0.235781	0.272611	0.341666	0.31654
1193.47	0.159921	0.167278	0.241224	0.283645	0.329348	0.32938
1195.72	0.158624	0.166285	0.247938	0.297397	0.340836	0.335739
1197.96	0.160786	0.17286	0.262287	0.306798	0.327304	0.343176
1200.2	0.172957	0.181681	0.282997	0.326854	0.370372	0.370771
1202.45	0.18142	0.197831	0.299492	0.359085	0.372874	0.404126
1204.69	0.209283	0.218002	0.330381	0.385444	0.427846	0.443798
1206.93	0.224171	0.236162	0.345362	0.40017	0.448567	0.47003
1209.17	0.23004	0.240134	0.35748	0.402283	0.459572	0.456659
1211.41	0.247028	0.252264	0.351544	0.393306	0.497541	0.444848
1213.65	0.25821	0.259073	0.344493	0.401941	0.540126	0.429475
1215.89	0.28533	0.264817	0.33426	0.381438	0.591213	0.41578
1218.13	0.32147	0.280966	0.340489	0.381156	0.624082	0.407084
1220.37	0.368237	0.308346	0.345207	0.403052	0.708936	0.413267
1222.6	0.409443	0.336082	0.365512	0.426469	0.826098	0.433008
1224.84	0.476721	0.37836	0.383748	0.447385	0.920427	0.463348
1227.08	0.536832	0.413898	0.4058	0.468192	1.03055	0.499726
1229.31	0.581991	0.446598	0.434851	0.501174	1.12269	0.544903
1231.55	0.635553	0.475515	0.468275	0.528937	1.21095	0.585679
1233.78	0.639319	0.488587	0.487781	0.547349	1.24285	0.625853
1236.02	0.646669	0.491136	0.499173	0.566956	1.2694	0.646226
1238.25	0.628935	0.494158	0.493386	0.555795	1.23984	0.653877
1240.48	0.622445	0.480272	0.488712	0.549743	1.22705	0.644127
1242.72	0.611754	0.473244	0.474175	0.528578	1.20283	0.627695
1244.95	0.606376	0.478984	0.467272	0.522198	1.20874	0.612222
1247.18	0.605199	0.471482	0.458778	0.520383	1.21417	0.605228
1249.41	0.612054	0.466817	0.450601	0.516829	1.19894	0.601112
1251.64	0.594319	0.458132	0.453399	0.510229	1.17279	0.601275
1253.87	0.573866	0.461152	0.456593	0.512217	1.11676	0.610437
1256.1	0.554896	0.435204	0.457878	0.521163	1.08332	0.610277
1258.33	0.51356	0.424272	0.460753	0.523584	1.00105	0.620716
1260.56	0.477414	0.393002	0.458537	0.522635	0.954733	0.629754
1262.78	0.43645	0.374384	0.453219	0.511682	0.894329	0.62887
1265.01	0.398327	0.34205	0.446548	0.50834	0.819108	0.623424
1267.24	0.352296	0.323786	0.42564	0.492819	0.75166	0.619138
1269.46	0.326899	0.305522	0.417059	0.469471	0.721136	0.60733
1271.69	0.314106	0.285247	0.408477	0.462212	0.6945	0.601481
1273.91	0.294023	0.274904	0.402518	0.460388	0.694099	0.58719
1276.14	0.295562	0.276384	0.394651	0.450735	0.709002	0.611858
1278.36	0.305998	0.273844	0.399825	0.449127	0.748441	0.603005
1280.59	0.311492	0.279343	0.395217	0.445453	0.766503	0.60439
1282.81	0.328353	0.301278	0.393152	0.440256	0.819303	0.606534
1285.03	0.353492	0.309142	0.396814	0.436798	0.83518	0.599877
1287.25	0.381721	0.324809	0.396021	0.448233	0.895025	0.594818
1289.47	0.426753	0.352181	0.410019	0.451405	0.993495	0.565518
1291.69	0.468203	0.398116	0.412088	0.45849	1.02759	0.569497
1293.91	0.508911	0.415201	0.416144	0.457747	1.0629	0.569234
1296.13	0.524535	0.425428	0.416143	0.459068	1.12129	0.55357
1298.35	0.537194	0.441922	0.430457	0.476262	1.11701	0.567585
1300.57	0.546888	0.445055	0.437135	0.481496	1.13921	0.560959
1302.79	0.537924	0.44866	0.442143	0.496297	1.11501	0.561451
1305.01	0.538597	0.455812	0.459397	0.517185	1.12457	0.565662
1307.22	0.547054	0.469703	0.470925	0.534702	1.10984	0.573471
1309.44	0.555018	0.48927	0.483088	0.531888	1.11892	0.5786
1311.65	0.573854	0.503397	0.495489	0.548208	1.15132	0.567527
1313.87	0.59405	0.538807	0.510037	0.561918	1.1553	0.573452
1316.08	0.616099	0.562747	0.524982	0.586716	1.17945	0.566177
1318.3	0.618996	0.58314	0.545334	0.604665	1.16229	0.56554
1320.51	0.621892	0.599513	0.561629	0.609784	1.16214	0.561982
1322.72	0.617252	0.598978	0.563846	0.622403	1.13965	0.542863
1324.94	0.594324	0.590758	0.561928	0.620237	1.10598	0.538782
1327.15	0.580663	0.574378	0.558974	0.60611	1.10777	0.51846
1329.36	0.569226	0.559773	0.553396	0.613074	1.08795	0.519297
1331.57	0.580401	0.555926	0.549248	0.595032	1.12716	0.508453
1333.78	0.616288	0.58353	0.548202	0.59906	1.18871	0.508447
1335.99	0.667743	0.594581	0.550654	0.600042	1.24104	0.52328
1338.2	0.671751	0.582102	0.534495	0.589065	1.23628	0.508032
1340.41	0.637455	0.554134	0.526368	0.571564	1.18609	0.512743
1342.62	0.570044	0.505357	0.502811	0.545799	1.09315	0.486932
1344.82	0.49386	0.456816	0.474084	0.522643	0.937295	0.46912
1347.03	0.419653	0.413123	0.449334	0.498834	0.850673	0.441468
1349.24	0.388075	0.400998	0.430706	0.480243	0.785185	0.419813
1351.44	0.37293	0.39644	0.420428	0.458173	0.765123	0.394758
1353.65	0.371624	0.400631	0.405935	0.438058	0.787573	0.372381
1355.85	0.388853	0.393826	0.396928	0.43262	0.795934	0.360843
1358.06	0.413495	0.411023	0.392057	0.429573	0.817656	0.342224
1360.26	0.425286	0.419824	0.392752	0.418372	0.847881	0.327364
1362.46	0.442514	0.427207	0.387084	0.406083	0.869846	0.308942
1364.67	0.459001	0.434235	0.376246	0.402381	0.893513	0.301319
1366.87	0.466591	0.433932	0.364134	0.391939	0.879042	0.294856
1369.07	0.476405	0.424643	0.354726	0.386606	0.909026	0.29131
1371.27	0.480411	0.442075	0.355497	0.380185	0.932451	0.281564
1373.47	0.485777	0.423799	0.354678	0.378112	0.937415	0.288897
1375.67	0.490895	0.425742	0.349244	0.367123	0.956469	0.290668
1377.87	0.488106	0.419526	0.343174	0.366354	0.933984	0.290078
1380.07	0.48371	0.42206	0.340046	0.367106	0.916358	0.283287
1382.27	0.477337	0.407094	0.336996	0.367096	0.916951	0.302775
1384.46	0.453418	0.400641	0.334264	0.367085	0.884265	0.309581
1386.66	0.447045	0.391824	0.33527	0.356855	0.880973	0.309787
1388.86	0.434494	0.368344	0.335082	0.360213	0.84343	0.325151
1391.05	0.422066	0.375843	0.330598	0.353786	0.836009	0.332114
1393.25	0.415198	0.357211	0.324524	0.362471	0.819114	0.329276
1395.44	0.401782	0.349575	0.329105	0.362892	0.796148	0.336557
1397.64	0.384658	0.339219	0.323427	0.359182	0.765408	0.357557
1399.83	0.367658	0.321059	0.321963	0.367864	0.747544	0.365635
1402.03	0.354242	0.310821	0.32368	0.360238	0.716562	0.362913
1404.22	0.330199	0.295026	0.330566	0.366311	0.662261	0.367429
1406.41	0.310851	0.288217	0.336815	0.378144	0.633224	0.384344
1408.6	0.292491	0.279634	0.334156	0.378127	0.62435	0.380218
1410.79	0.281669	0.283583	0.340881	0.380719	0.598471	0.384811
1412.98	0.278384	0.264713	0.33496	0.382548	0.585226	0.386203
1415.17	0.271516	0.265115	0.339377	0.375028	0.573195	0.376393
1417.36	0.262918	0.258896	0.336715	0.373051	0.567238	0.386623
1419.55	0.255431	0.260007	0.33294	0.374987	0.555208	0.386331
1421.74	0.246092	0.255089	0.328686	0.368117	0.543665	0.385078
1423.93	0.237246	0.240474	0.323717	0.364182	0.508316	0.395824
1426.12	0.221728	0.222312	0.311191	0.355136	0.491672	0.382209
1428.3	0.197931	0.215028	0.30447	0.347503	0.448065	0.383153
1430.49	0.18229	0.192137	0.294727	0.347045	0.42948	0.399056
1432.68	0.170725	0.194784	0.316	0.362894	0.410165	0.425878
1434.86	0.158173	0.185017	0.326934	0.373524	0.402998	0.459379
1437.05	0.159582	0.188491	0.348126	0.407094	0.39996	0.524238
1439.23	0.153702	0.193266	0.37067	0.445881	0.415871	0.583457
1441.41	0.151775	0.207382	0.412142	0.478906	0.43154	0.651554
1443.6	0.159857	0.207309	0.437706	0.519105	0.459598	0.69413
1445.78	0.158919	0.215394	0.459692	0.524514	0.482555	0.714345
1447.96	0.184176	0.23613	0.461396	0.534706	0.509885	0.71764
1450.14	0.201154	0.244925	0.467793	0.527828	0.545718	0.707053
1452.32	0.219985	0.258212	0.458759	0.527255	0.585924	0.681385
1454.5	0.24586	0.275992	0.456406	0.524073	0.637304	0.663676
1456.68	0.279889	0.307605	0.45787	0.5073	0.679455	0.645605
1458.86	0.307123	0.325976	0.445494	0.507378	0.729379	0.634654
1461.04	0.334603	0.337489	0.442344	0.489191	0.784648	0.612182
1463.22	0.342314	0.343208	0.436091	0.482636	0.810282	0.601229
1465.4	0.346935	0.345853	0.428248	0.471296	0.834215	0.590354
1467.57	0.361442	0.36848	0.422233	0.466262	0.870781	0.571039
1469.75	0.409433	0.410024	0.432203	0.455466	0.95496	0.551363
1471.93	0.471511	0.477698	0.45108	0.461738	1.0904	0.516525
1474.1	0.564232	0.559442	0.467491	0.472575	1.24502	0.478007
1476.28	0.667826	0.658094	0.485492	0.478737	1.45771	0.444447
1478.45	0.799716	0.748942	0.4887	0.471091	1.62982	0.392407
1480.63	0.903681	0.802664	0.473695	0.448659	1.77692	0.331605
1482.8	0.958098	0.81252	0.447236	0.4284	1.839	0.294723
1484.97	0.956788	0.772717	0.422925	0.392812	1.81362	0.256239
1487.14	0.882329	0.698271	0.385729	0.358201	1.69133	0.218634
1489.32	0.752392	0.595566	0.339466	0.325765	1.47769	0.193669
1491.49	0.625172	0.489078	0.293043	0.288435	1.22519	0.184942
1493.66	0.506973	0.400443	0.256402	0.257845	1.03731	0.175374
1495.83	0.404219	0.322923	0.231293	0.239215	0.84845	0.165166
1498	0.340757	0.279808	0.208966	0.207102	0.719596	0.161636
1500.17	0.296695	0.242487	0.195229	0.201734	0.621108	0.153785
1502.33	0.27129	0.217226	0.178787	0.185385	0.597196	0.149054
1504.5	0.269362	0.223061	0.172444	0.191105	0.553852	0.151281
1506.67	0.271512	0.216245	0.172544	0.182365	0.575124	0.138628
1508.84	0.260564	0.206709	0.171529	0.182757	0.569433	0.143653
1511	0.257647	0.197528	0.169241	0.181409	0.556698	0.140957
1513.17	0.239656	0.199342	0.166396	0.181365	0.523072	0.138941
1515.33	0.217216	0.175854	0.164585	0.180234	0.492605	0.140283
1517.5	0.199843	0.169983	0.160626	0.17334	0.437118	0.137505
1519.66	0.194949	0.166003	0.155552	0.173512	0.445762	0.143565
1521.83	0.181159	0.157176	0.15525	0.172705	0.410682	0.140265
1523.99	0.179231	0.162892	0.163458	0.175159	0.416412	0.138883
1526.15	0.176685	0.156902	0.162201	0.179135	0.423357	0.141861
1528.31	0.184024	0.160252	0.160545	0.17724	0.418643	0.142758
1530.48	0.179871	0.161475	0.163502	0.175888	0.416116	0.140173
1532.64	0.18202	0.170501	0.169401	0.183776	0.3978	0.140988
1534.8	0.173914	0.162973	0.165597	0.182205	0.399161	0.144362
1536.96	0.171368	0.155091	0.161792	0.178133	0.387404	0.138695
1539.12	0.167833	0.149692	0.166179	0.172648	0.367632	0.140547
1541.27	0.162568	0.142755	0.164123	0.178903	0.363893	0.145278
1543.43	0.143341	0.139602	0.161192	0.180266	0.33975	0.145648
1545.59	0.143019	0.147918	0.16836	0.185869	0.334069	0.142337
1547.75	0.142697	0.147839	0.169484	0.182447	0.330332	0.148585
1549.9	0.144104	0.146223	0.165836	0.184678	0.322466	0.144553
1552.06	0.154903	0.153474	0.164652	0.186039	0.336949	0.153239
1554.22	0.171755	0.171485	0.179931	0.196423	0.376211	0.148245
1556.37	0.197628	0.188668	0.180496	0.202241	0.433692	0.152329
1558.53	0.232027	0.219211	0.19657	0.205883	0.474655	0.153253
1560.68	0.282735	0.252474	0.212722	0.220289	0.553514	0.157136
1562.83	0.34197	0.305482	0.224022	0.235346	0.658123	0.155697
1564.99	0.40244	0.348913	0.242242	0.250838	0.767591	0.155178
1567.14	0.489846	0.433372	0.265153	0.273723	0.938519	0.151698
1569.29	0.595293	0.501632	0.297448	0.304217	1.0871	0.153297
1571.44	0.697527	0.583253	0.330777	0.332536	1.24467	0.157896
1573.59	0.756884	0.628575	0.357186	0.366509	1.36215	0.157613
1575.74	0.762122	0.660419	0.381288	0.388956	1.38199	0.159409
1577.89	0.72782	0.640238	0.402766	0.402054	1.36611	0.164485
1580.04	0.639398	0.587306	0.411518	0.410258	1.20667	0.17272
1582.19	0.547022	0.519477	0.395296	0.405742	1.05671	0.190914
1584.34	0.443649	0.463116	0.387903	0.390245	0.905289	0.201346
1586.49	0.37821	0.398952	0.360228	0.362353	0.753382	0.206779
1588.63	0.319196	0.360681	0.33486	0.349791	0.654919	0.21133
1590.78	0.290207	0.323237	0.303844	0.330487	0.610384	0.21708
1592.93	0.274686	0.301874	0.308776	0.32673	0.570708	0.234469
1595.07	0.26139	0.28725	0.307345	0.3283	0.537834	0.256378
1597.22	0.266133	0.277829	0.312276	0.34422	0.525609	0.276166
1599.36	0.258521	0.276683	0.317445	0.352529	0.532333	0.298393
1601.5	0.254862	0.267853	0.327624	0.367688	0.520109	0.323099
1603.65	0.251327	0.265407	0.333906	0.376866	0.515174	0.329404
1605.79	0.241243	0.261542	0.333745	0.367344	0.495907	0.327788
1607.93	0.236101	0.253184	0.330323	0.373369	0.486843	0.339732
1610.07	0.230713	0.248728	0.333502	0.37711	0.471222	0.352554
1612.22	0.233726	0.250538	0.342804	0.385091	0.477706	0.377856
1614.36	0.221048	0.253649	0.352742	0.411119	0.479819	0.398877
1616.5	0.234564	0.250848	0.355999	0.414207	0.494806	0.402217
1618.64	0.230905	0.242608	0.353132	0.392941	0.481373	0.375717
1620.78	0.236514	0.244773	0.333404	0.370914	0.471585	0.360895
1622.91	0.239898	0.233459	0.322026	0.359758	0.488275	0.337513
1625.05	0.233521	0.228411	0.306591	0.35643	0.487962	0.33341
1627.19	0.224302	0.223245	0.303961	0.346143	0.465058	0.333026
1629.33	0.222991	0.223518	0.31493	0.356078	0.451871	0.338601
1631.46	0.213649	0.220125	0.311027	0.359598	0.445729	0.341416
1633.6	0.209249	0.212712	0.320245	0.367684	0.434973	0.367829
1635.73	0.214734	0.212512	0.325646	0.379792	0.439521	0.374162
1637.87	0.210704	0.219051	0.33216	0.389507	0.439698	0.390454
1640	0.213224	0.21755	0.34432	0.401506	0.436231	0.417545
1642.14	0.217226	0.234139	0.354253	0.417201	0.440538	0.431636
1644.27	0.213815	0.230037	0.365617	0.424089	0.447761	0.464245
1646.4	0.222759	0.237403	0.379048	0.447284	0.457657	0.493854
1648.53	0.227132	0.235074	0.397331	0.463086	0.457594	0.515462
1650.67	0.221373	0.243505	0.416488	0.495196	0.474535	0.547789
1652.8	0.235878	0.256665	0.435246	0.502409	0.485405	0.575436
1654.93	0.245441	0.258947	0.446847	0.526256	0.498461	0.610842
1657.06	0.249196	0.269269	0.461231	0.552711	0.501801	0.639687
1659.19	0.250109	0.272734	0.479353	0.569381	0.49494	0.661131
1661.32	0.266468	0.286248	0.496917	0.59377	0.550752	0.697534
1663.44	0.277513	0.286875	0.518537	0.604352	0.546564	0.714977
1665.57	0.279291	0.301217	0.520115	0.612214	0.558166	0.727739
1667.7	0.29392	0.30409	0.527101	0.619425	0.582401	0.72582
1669.83	0.310402	0.313348	0.527565	0.618589	0.601535	0.71378
1671.95	0.319471	0.313029	0.523813	0.608295	0.625285	0.69002
1674.08	0.337312	0.312946	0.509722	0.585824	0.638105	0.661979
1676.2	0.341932	0.318066	0.496744	0.567701	0.660642	0.644217
1678.33	0.347665	0.315973	0.472154	0.534575	0.649899	0.613974
1680.45	0.35315	0.313762	0.439531	0.502317	0.662964	0.56741
1682.58	0.364319	0.305521	0.419474	0.475605	0.688661	0.516726
1684.7	0.364491	0.307802	0.391701	0.442043	0.679864	0.469722
1686.82	0.365157	0.302162	0.361622	0.40337	0.665724	0.426516
1688.94	0.360758	0.294985	0.336236	0.378505	0.675633	0.37707
1691.07	0.345855	0.278349	0.307985	0.344724	0.652749	0.338342
1693.19	0.33849	0.265851	0.281166	0.308877	0.643712	0.290815
1695.31	0.334462	0.254418	0.251245	0.269769	0.627145	0.260006
1697.43	0.314123	0.231042	0.224902	0.23827	0.588959	0.216357
1699.55	0.299962	0.222092	0.196889	0.208728	0.572151	0.181187
1701.67	0.283083	0.197179	0.176908	0.184296	0.522307	0.150376
1703.78	0.267686	0.193076	0.153109	0.159211	0.494811	0.135085
1705.9	0.252661	0.175257	0.137899	0.141627	0.467074	0.108073
1708.02	0.241836	0.174465	0.12603	0.126761	0.441037	0.0978199
1710.14	0.230764	0.159484	0.112967	0.113634	0.406014	0.0862464
1712.25	0.220063	0.161766	0.109367	0.108226	0.403056	0.0751922
1714.37	0.212699	0.151514	0.1037	0.105101	0.386738	0.0743773
1716.48	0.201751	0.154623	0.0925448	0.0906686	0.359247	0.0648016
1718.6	0.188208	0.144017	0.0951481	0.0916742	0.327627	0.0596253
1720.71	0.180843	0.14618	0.0964786	0.0927882	0.304024	0.0550884
1722.83	0.155439	0.134037	0.0901737	0.0875961	0.293539	0.0531907
1724.94	0.13683	0.124141	0.0903106	0.0877311	0.240787	0.0473723
1727.05	0.129713	0.116372	0.0879021	0.0853652	0.200668	0.0441133
1729.16	0.104926	0.0996176	0.0850957	0.076802	0.182169	0.0469335
1731.27	0.0801394	0.0813261	0.0835614	0.0743268	0.145938	0.0384731
1733.39	0.07191	0.0811247	0.0722446	0.0703293	0.145173	0.0441721
1735.5	0.0663991	0.0659073	0.0681647	0.0629612	0.124976	0.0389903
1737.61	0.0586641	0.0606218	0.0655161	0.0645078	0.0904476	0.0382479
1739.72	0.0469751	0.0540356	0.0584135	0.0611617	0.0901712	0.0437448
1741.82	0.0409701	0.0418924	0.0571958	0.0597724	0.0877092	0.0420811
1743.93	0.040896	0.0427552	0.0569322	0.0553386	0.0721304	0.0337367
1746.04	0.0313077	0.0368785	0.0516579	0.0502522	0.0754999	0.0361516
1748.15	0.0287625	0.0261541	0.0548136	0.0491882	0.0691534	0.0313659
1750.25	0.027453	0.0274898	0.0448463	0.0485587	0.0533338	0.0338996
1752.36	0.0228073	0.0269338	0.0430705	0.0404274	0.0579201	0.0340325
1754.47	0.0238455	0.0196383	0.0409762	0.0316435	0.0440452	0.0308049
1756.57	0.0235246	0.018964	0.0319624	0.0363405	0.0411025	0.0255366
1758.68	0.0164078	0.0153339	0.0312196	0.0350578	0.0680395	0.0262676
1760.78	0.0199174	0.0182067	0.0280906	0.0281213	0.0405634	0.0244781
1762.88	0.0147777	0.00984713	0.0290969	0.0207497	0.0140597	0.0206478
1764.99	0.0128507	0.00751762	0.0206387	0.025337	0.0249662	0.020657
1767.09	0.0101823	0.00908991	0.0227579	0.0197045	0.0305293	0.0252655
1769.19	0.0156691	0.0082975	0.0174008	0.0178768	0.0166595	0.0162334
1771.29	0.0118887	0.00821453	0.0157019	0.017571	0.0202807	0.0230807
1773.39	0.00563724	0.00564863	0.0202857	0.0178086	0.0149146	0.0154073
1775.49	0.00914717	0.00875807	0.0182682	0.0134796	0.0187801	0.0134134
1777.6	0.0120393	0.0136411	0.019352	0.0164347	0.0197314	0.0158188
1779.69	0.00615868	0.00634581	0.0163796	0.0148233	0.00853745	0.0159036
1781.79	0.00744466	0.0106377	0.0165085	0.0144075	0.0330533	0.0124278
1783.89	0.0104605	0.0122102	0.0179097	0.0145352	0.0177312	0.0125513
1785.99	0.00952252	0.010945	0.0107213	0.0161846	0.0113979	0.0124743
1788.09	0.00660756	0.00826105	0.00894074	0.0123979	0.0142962	0.0117567
1790.18	0.00641101	0.00191182	0.0104207	0.00893708	0.0167094	0.00967846
1792.28	0.00596739	0.0115244	0.00848051	0.0108033	0.00916366	0.0100796
1794.38	0.00502958	0.00363821	0.00693774	0.0083205	0.00477663	0.00852021
1796.47	0.00532745	0.00450145	0.00793971	0.00801188	0.00160494	0.0083602
1798.57	0.00476044	0.00370943	0.0110888	0.00596351	0.00134901	0.00563959
1800.66	0.00098089	-0.00240316	0.00485291	0.00695908	0.000122174	0.0067184
1802.75	-0.00366354	0.000588421	0.00649036	0.00610619	-0.00207563	0.00611662
1804.85	-2.92675e-05	0.00346183	0.00200369	0.00862341	0.0107883	0.00743427
1806.94	-0.00133741	-0.000167711	0.00554938	0.00439977	0.0166084	0.00491133
1809.03	0.000937803	-0.00166896	0.00130081	0.00343753	-0.00259146	0.00566782
1811.12	-0.00160583	-0.00234252	-0.000641622	-0.00122141	-0.00915878	0.00302373
1813.21	0.000298816	-0.000533088	-0.000516492	0.00107751	-0.0135391	0.00485908
1815.3	-0.00619867	9.40343e-05	-0.000550657	0.000549514	-0.000671355	0.00689385
1817.39	-0.00713581	0.00166708	0.00076696	-0.00019613	0.0148692	0.00500806
1819.48	-0.000906312	-0.00409044	-0.00117643	-0.00355126	-0.000925996	0.0068417
1821.57	-0.00221402	0.000675054	0.00324241	-0.00342755	0.00757143	0.00135478
1823.66	-0.00500439	0.000356469	0.00328683	-0.0030866	0.018013	0.000667309
1825.75	-0.00260511	-0.00421856	0.0012632	-0.000245301	-0.00531044	0.00301928
1827.84	-0.00551892	0.00232062	-0.000999258	-0.00197043	-0.00579873	0.00109069
1829.92	-0.00657923	-0.00781138	-0.00604552	0.000435609	-0.0223189	0.00240156
1832.01	-0.00640386	-0.0025727	0.000996696	-0.00313814	0.0034296	0.00167188
1834.1	-0.00523993	0.00443958	-0.000630195	0.000680868	0.0053728	2.16532e-05
1836.18	-0.00864771	0.000455977	-0.000507632	-0.00278454	-0.0111451	-0.00194912
1838.27	-0.00365322	-0.00518286	-0.00340746	0.00212129	-0.00482782	0.00135957
1840.35	-0.00421895	-0.00597398	-0.000263162	-0.00308401	-0.00361108	0.000747726
1842.43	-0.00379611	-0.00581917	-0.0056289	0.001604	-0.00336526	0.000415343
1844.52	-0.00880991	0.00273045	-0.000417228	-0.00284061	-0.0101633	0.000442431
1846.6	-0.00949899	0.00146654	-0.00514716	-0.00261048	-0.0184181	0.00114898
1848.68	-0.00771675	-0.00145259	-0.00478731	0.00468628	4.89379e-05	0.00113501
1850.76	-0.00531663	-0.00626344	-0.00251893	-0.0125878	5.4947e-05	0.000160518
1852.84	-0.00155727	-0.00386185	-0.00303436	0.00514568	-0.0132988	-0.0026545
1854.92	-2.19371e-05	-0.00406139	-0.00474295	-0.00767124	-0.00260287	-0.00295004
1857	-0.00355256	-0.0141927	-0.00239568	-0.000157747	0.0008063	0.000713904
1859.08	-0.00819517	-0.00717968	-0.0080017	-0.00547334	0.00761714	-0.000582662
1861.16	-0.00258208	-0.00607844	-0.00358704	-0.0040485	-0.00816275	0.00300025
1863.24	-0.0037648	-0.00970655	-0.00434208	0.00139882	-0.00548	-0.00333734
1865.32	-0.00914855	-0.00423044	-0.00135937	-0.00717886	0.00133318	-0.000155429
1867.4	-0.00501796	-0.00537548	-0.00418263	0.00207332	-0.0234324	-0.00261403
1869.47	-0.00261717	-0.0047469	-0.00477921	-0.00443902	-0.0231765	-0.000673136
1871.55	-0.00787712	-0.00731062	-0.00815958	-0.00323242	-0.00348626	-0.00273274
1873.63	-0.0063411	-0.0129484	-0.00255314	-0.00159109	-0.0163464	0.000207161
1875.7	-0.00171595	-0.00759018	-0.0036275	-0.00462486	0.00553163	-0.00153343
1877.78	-0.00895265	-0.00920781	-0.000566445	-0.00472337	-0.0151004	-0.00543452
1879.85	-0.00408022	-0.00822417	-0.00474289	-0.00764874	-0.00390921	-0.00201609
1881.92	-0.00785703	-0.00215632	-0.00486344	-0.00339873	-0.0133653	-0.00491815
1884	-0.0073091	-0.00625667	-0.00657481	-0.00643312	-0.0262216	-0.0041407
1886.07	-0.00404272	-0.00586398	-0.0058209	-0.0037055	-0.0128418	-0.00280372
1888.14	-0.00596586	-0.00156944	-0.00546483	-0.00674017	-0.00456248	-0.00570723
1890.21	-0.00813603	-0.00744309	-0.00439315	-0.00488258	-0.0157159	-0.00101121
1892.29	-0.00672284	-0.00409428	-0.00149246	-0.00487339	-0.0183664	-0.00039567
1894.36	-0.00444462	-0.010559	-0.00415911	-0.00616896	-0.00911302	-0.0028606
1896.43	-0.00414331	-0.00283526	-0.0077803	-0.00452925	-0.0156486	-0.00260599
1898.5	-0.00359478	-0.00728975	-0.0058345	-0.00897796	-0.0161104	-0.00227186
1900.57	-0.00786508	-0.0081971	-0.00404795	-0.00429436	-0.0170573	-0.00273819
1902.63	-0.00249747	-0.00993202	-0.00242062	-0.00548175	-0.0153312	-0.00372498
1904.7	-0.0103509	-0.00268093	-0.00659923	-0.000580974	-0.00898895	-0.00143223
1906.77	-0.00807215	-0.00346978	-0.000598038	-0.00350813	-0.0143059	-0.00393993
1908.84	-0.000974416	-0.00366738	-0.00199341	-0.00882727	-0.000431574	-0.00300809
1910.9	-0.00413222	-0.00717548	-0.00299128	-0.00273095	0.00785648	-0.0020767
1912.97	-0.00370664	-0.00760936	-0.00589806	-0.00391898	-0.0205354	-0.00706577
1915.03	-0.00328096	-0.000830772	-0.00506704	-0.00521584	-0.000585656	-0.00833527
1917.1	-0.00507932	-0.00244684	-0.00383854	-0.00379484	-0.0114858	-0.00244523
1919.16	-0.00205867	0.000548382	0.000332449	-0.00628787	0.0026355	-0.00207562
1921.23	0.0012092	-0.00118573	-0.00297263	-0.000844466	-0.00219006	-0.00410646
1923.29	-0.000588873	-0.00114621	-0.0101749	-0.00214179	-0.00555728	-0.00453772
1925.35	-0.0080707	-0.000633664	-0.00767451	-0.00604853	-0.0188834	-0.00324944
1927.42	-0.000601451	-0.00378632	-0.0028679	-0.00169266	-0.00961724	-0.00748157
1929.48	0.00155473	-0.00705712	-0.00378767	-0.00255545	0.00110724	-0.00495414
1931.54	-0.00320844	-0.00548015	-0.00120821	-0.00385322	0.00260163	-0.00610713
1933.6	-0.00475892	-0.00626781	-0.00332125	0.00191567	-0.00707747	-0.00146056
1935.66	0.00147508	0.00287644	-0.00686599	-0.00329623	0.0017061	-0.0044144
1937.72	0.000171923	-0.00252221	-0.00253731	-0.00524664	0.00587501	-0.00932866
1939.78	-1.90872e-05	-0.00271839	-0.00385547	-0.00556635	0.00154257	-0.00320335
1941.84	-0.000209997	0.00181498	-0.0039808	-0.00849544	-0.0134775	-0.00459844
1943.9	0.00157618	0.0012643	-0.00275425	-0.000443923	-0.00833443	-0.00391395
1945.96	-0.00108577	-0.00850866	-0.00614064	-0.00163369	-0.000518467	-0.00646987
1948.01	-0.00275913	-0.00161028	-0.00252845	-0.00510666	-0.00703391	-0.0069462
1950.07	-0.00678006	-0.000860053	-0.00281341	-0.00303503	0.00151242	-0.00402294
1952.13	-0.00239869	-0.00732209	-0.00627973	-0.00422507	0.00301495	-0.00502007
1954.18	-0.000241326	-0.000778097	-0.00115685	-0.0032408	-0.00738474	-0.00493761
1956.24	0.00228682	-0.000736961	-0.00589595	-0.00247407	0.0188972	-0.00713555
1958.29	-0.00148658	-0.000341011	-0.00467035	-0.00203358	-0.00388977	-0.00421388
1960.35	-0.00142947	-0.00160024	-0.0060694	-0.00104957	-0.0101574	-0.00249261
1962.4	0.00295241	-0.00203171	-0.00404874	-0.00691498	-0.0161812	-0.00357172
1964.45	-0.00255054	0.00132047	-0.00290305	-0.000712593	-0.01103	-0.00717123
1966.5	-0.00533504	0.000534507	-0.000644059	-0.0045125	-0.00587793	-0.00561113
1968.56	-0.00391832	0.00104926	-0.00323657	-0.00233289	-0.00971304	-0.0048114
1970.61	-0.00682617	-0.00198294	-0.0035228	-0.00939454	0.0107446	-0.00653206
1972.66	-0.00639774	0.0013697	-0.00166183	-0.00264885	0.00739695	-0.0047331
1974.71	-0.00399222	-0.000834629	-0.00711782	-0.00188283	0.000163452	-0.00521451
1976.76	-0.00479919	0.00145412	-0.00167819	-0.00959702	-0.010713	-0.00425631
1978.81	-0.00498825	-0.00571587	-0.00411223	-0.00556953	-0.00652765	-0.00425847
1980.86	0.00211294	-0.00141687	-0.00328561	-0.00317291	-0.00428481	-0.004781
1982.91	-0.00264769	-0.00823191	-0.00476551	-0.00501643	-0.017588	-0.0053439
1984.95	-0.0051841	-0.000976787	-0.00210992	-0.00522923	-0.000282495	-0.00326717
1987	-0.00191299	-0.00708217	-0.00677127	-0.0017456	-0.00823975	-0.0076308
1989.05	-0.00321357	-0.00230975	-0.00252527	-0.00619859	-0.00259273	-0.0028748
1991.1	-0.00216636	-0.00191192	-0.00114249	-0.00521564	-0.00836205	-0.00783914
1993.14	-0.000624781	-0.00612516	0.00055832	-0.00934257	-0.00951506	-0.00592384
1995.19	-0.00155434	0.00444119	-0.00346722	-0.00281503	-0.0150398	-0.0035289
1997.23	-0.00668487	-0.00485593	-0.0099583	-0.00879031	-0.00720314	-0.00629431
1999.28	-0.00427804	-0.000910538	-0.00404268	-0.00487216	-0.00713908	-0.00366008
2001.32	0.00443056	-0.00512327	-0.00114932	-0.00769468	0.00239968	-0.00458618
2003.36	-0.000946756	-0.00259643	-0.00557289	-0.00573356	0.00732385	-0.00263263
2005.41	-0.00249355	-0.00243419	-0.00108911	-0.00366379	-0.0142293	-0.00463942
2007.45	-0.00441092	-0.00369064	-0.00567194	-0.00137661	-0.0202349	-0.00132655
2009.49	-0.00842872	-0.00494696	-0.00723269	-0.00756963	-0.0179803	-0.00497402
2011.53	-0.00293215	-0.00490255	-0.00585089	-0.00376047	-0.0152391	-0.00630183
2013.57	-3.02588e-05	0.00164495	-0.00311715	-0.0057135	-0.00375189	-0.00546997
2015.61	-0.0050362	-0.00540451	-0.0068255	-0.000382337	-0.0109686	-0.00571844
2017.65	-0.00509956	-0.00441382	-0.00592116	-0.00559704	-0.0133262	-0.00440724
2019.69	0.000273914	-0.00342299	-0.00390346	-0.00331011	0.00107859	-0.00585636
2021.73	-0.00473168	-0.0026685	-0.00284022	-0.0036325	0.00236655	-0.00466581
2023.77	-0.00133495	0.0022244	-0.00289048	-0.00254154	-0.00484678	-0.00187557
2025.81	-0.00918223	-0.00245968	-0.00508818	-0.0012332	-0.024934	-0.00308566
2027.84	-0.00232553	-0.00324183	-0.00816078	-0.00101207	-0.0197568	-0.00781607
2029.88	-0.00658927	0.00153324	-0.00558677	-0.00155201	-0.0170079	0.000333215
2031.91	-0.000844393	-0.00385982	-0.00516018	-0.0027443	-0.0196024	-0.00183782
2033.95	-0.00436652	8.78903e-05	0.000435868	-0.00513252	-0.0136938	-0.00240915
2035.99	-0.0028225	-0.00696019	-0.000966901	-0.00251967	-0.0177441	-0.00606081
2038.02	0.000204389	-0.00230279	-0.00372176	-0.000559156	0.00128374	-0.00459276
2040.05	-0.00195819	-9.95056e-06	-0.00210249	0.000749021	0.00500857	-0.00352502
2042.09	-0.00572696	0.000864199	-0.0043803	-0.00544449	-0.0150718	-0.00397758
2044.12	-0.00220545	-0.00251799	-0.0053857	-0.00957234	-0.0278638	-0.00231044
2046.15	0.000451244	-0.00400826	-0.00424381	-0.00750317	-0.0207355	-0.00256359
2048.19	0.00187245	-0.00585308	-0.00214762	-0.00391194	-0.00729045	-0.010017
2050.22	0.000822544	-0.00474187	-0.00712975	-0.00434336	-0.013521	-0.00131078
2052.25	-0.00208066	-0.00232991	-0.00217057	-0.00847126	-0.00639016	-0.00500481
2054.28	-0.00300675	-0.00476547	-0.00405112	-0.000422562	-0.0237933	-0.00329913
2056.31	-0.0010908	-0.00542734	-0.00259143	-0.0057464	-0.0285637	0.00280626
2058.34	-0.000533892	-0.00573434	-0.00264287	0.000236627	-0.0272603	-0.00160862
2060.37	-0.00183029	-0.00143001	-0.0034897	-0.00900114	-0.0162394	-0.00454379
2062.39	-0.00312655	-0.00315553	-0.00473421	-0.00649716	-0.027566	-0.00759923
2064.42	2.55299e-05	-0.00724563	0.000224606	-0.000405448	-0.0126566	-0.00413497
2066.45	-0.00806637	-0.00305906	-0.00515563	-0.00551185	-0.0247103	-0.000110962
2068.48	-0.00441978	0.000536489	-0.00361673	-0.00159452	-0.0151433	-0.00420723
2070.5	-0.00312073	-0.0071002	-0.00152116	-0.000286455	-0.0213652	-0.00294377
2072.53	-0.00231579	-0.00161257	-0.00149344	-0.00321846	-0.0232137	-0.00128057
2074.55	0.00256681	-0.00073597	-0.000829528	-0.00136679	-0.0148588	-0.00149765
2076.58	-0.00268252	0.000968435	-0.000722379	-0.00484239	-0.0159768	-0.00215499
2078.6	0.00343596	-0.00122878	-0.00141058	-0.00342559	-0.00300463	-0.00449259
2080.63	-0.00749694	-0.000351684	-0.00448474	-0.000704118	-0.0189389	0.00136957
2082.65	0.00183441	-0.00538624	-0.00342335	-0.00352737	-0.0168964	-0.00292856
2084.67	-0.00390863	0.00246709	-0.00673618	-0.00569827	-0.0216547	-0.00230691
2086.7	0.000356961	0.00570936	0.00267587	-0.00297678	-0.0171812	-0.00260555
2088.72	0.00437557	0.000202377	0.00103311	-0.00177734	-0.0114922	-0.00218441
2090.74	-0.000378577	0.000607342	-0.00164359	0.0020314	-0.0228067	-0.000323524
2092.76	-0.00513259	-0.00608167	0.00108778	0.000186721	-0.00278374	-0.00154289
2094.78	0.00407602	-0.00437578	-0.00103228	0.00421293	-0.0157969	-0.00252249
2096.8	0.00191708	-0.00385209	-0.00164128	-0.00839496	-0.0222504	-0.00514234
2098.82	0.000128961	-0.00214586	-0.00384093	0.00465504	-0.00902654	-0.00212243
2100.84	-5.27176e-05	-0.0068242	0.000321867	-0.00175578	-0.000903132	-0.00454276
2102.86	0.00236055	0.0009124	-0.000446261	0.000531033	-0.0224149	0.000796691
2104.87	0.00267339	-0.00116441	-0.00455474	0.00249169	-0.0060305	-0.00310411
2106.89	-0.00207966	-0.00241341	-7.39067e-05	0.000321022	-0.0132083	-0.00200514
2108.91	0.00206388	3.09957e-06	3.27271e-05	-0.00152343	-0.00168051	-0.00454638
2110.92	-0.00404806	0.00703097	-0.00343956	-0.00282425	-0.0125003	-0.000487857
2112.94	0.00120782	-0.000365739	0.000484518	-0.000211127	-0.000727822	0.00165045
2114.96	-8.49417e-05	-0.00244169	-0.00497611	-0.00488222	-0.0130034	-0.00461149
2116.97	0.00529478	0.0025767	-0.00383566	0.000775128	-0.00195792	-0.00251364
2118.98	0.00239601	-0.00150889	-0.0023771	0.00556275	0.000829236	-0.002976
2121	-0.00297386	-0.00133782	-0.00107762	-0.00215235	-0.0102291	-0.00179858
2123.01	0.00586602	-0.000693601	0.00459607	-0.00627964	-0.00889764	0.000538648
2125.02	-0.00160411	0.00408902	0.00438443	0.000247623	-0.0031928	0.000835642
2127.04	0.00661824	0.00189592	0.000991537	0.0022087	0.00712839	-0.00326758
2129.05	-0.00109872	0.00159479	0.000461776	-0.000831259	-0.00732722	0.00190902
2131.06	-0.000907591	0.000466161	-0.00149958	0.00145607	-0.0171665	-0.00299462
2133.07	-0.00417604	0.00643188	0.00425359	0.00254755	0.00748958	0.000781566
2135.08	0.00256416	0.00211128	-0.00184337	0.00548733	0.00639718	-0.000362455
2137.09	-0.00119826	-0.000435626	0.00176243	-5.302e-05	-0.00926952	-0.000506693
2139.1	0.00319456	0.00127416	0.000994036	0.00114734	-0.00914555	0.000148888
2141.11	0.00252149	0.00180177	0.000146113	0.00115183	-0.0121786	0.00252427
2143.11	0.00740885	0.00232957	0.00621738	0.00583133	0.00106474	-0.00130054
2145.12	0.000557984	0.00604992	0.00155197	-0.000469807	0.00556393	0.000594465
2147.13	0.00853468	0.00173042	-0.00048892	0.00301389	0.00909234	-0.00263072
2149.14	0.00156055	0.00746116	0.00144674	0.00530173	0.00169028	0.000223898
2151.14	0.00558358	0.00349677	0.00258712	-0.000673044	-0.00959753	-0.000321646
2153.15	0.00441715	0.00307962	0.00412514	0.00433291	0.00802286	0.00453261
2155.15	0.00856403	0.00443622	0.00208429	0.00466401	-0.00982197	-0.0022133
2157.16	0.00529736	0.000117668	0.00338373	-0.00261523	0.00318475	0.000800594
2159.16	0.00437851	0.00797761	0.00269493	0.00228223	0.0101194	-0.00154567
2161.16	0.00333625	0.00637887	0.00439204	0.00446174	0.000536503	-0.000372129
2163.17	0.00661881	0.00454387	0.00433951	0.00294487	0.0157322	0.00240126
2165.17	0.00273493	0.00590144	0.00715011	0.00523327	0.01271	-0.000945525
2167.17	0.00478218	0.00773213	0.000496532	0.00186831	0.011389	-0.00161248
2169.17	0.00238135	0.00719831	0.000603105	-0.00138785	0.0141986	0.000360404
2171.17	0.00418178	0.00228997	0.00476577	0.00231413	0.0121507	-0.00042688
2173.17	0.0048703	0.00731362	0.00479285	0.00960394	0.0285655	0.000745675
2175.17	0.00407624	0.00228743	0.00132059	0.00449977	0.0146164	0.00171807
2177.17	0.0085955	0.00435561	0.00444944	0.00276602	0.0115996	-0.000469678
2179.17	0.0047127	0.0122175	0.00320409	0.00592472	-0.00866364	0.0012624
2181.17	0.00255993	0.00624604	0.00561718	0.00560447	0.0169857	-0.00276567
2183.17	0.00856239	0.00701423	0.00651924	0.00539305	0.00109694	0.000406116
2185.17	0.00999322	0.00328964	0.00249038	0.00257241	-0.0031309	0.00149774
2187.16	0.0119185	0.00713235	0.00665326	0.00638379	0.0247075	0.00138923
2189.16	0.00173481	0.00293525	0.00182917	0.00595519	0.00372014	0.00236058
2191.16	0.00168337	0.00689659	0.000743037	0.00748361	0.0138273	-0.00338824
2193.15	0.00212634	0.00565578	0.00434929	-0.00109879	0.0224778	-0.00037718
2195.15	0.00615276	0.0105634	0.00421762	-5.03403e-06	0.0150966	0.000313739
2197.14	0.00634893	0.00376597	0.00416552	0.00717712	0.0181619	0.00240452
2199.13	0.00469183	0.0102111	0.00546548	0.00479203	0.0285156	-0.00222483
2201.13	0.00933654	0.0125182	0.00334564	0.00349424	0.0131208	0.00542568
2203.12	0.0111395	0.00548488	0.00719067	0.00567557	0.00987289	0.000956059
2205.11	0.00676452	0.00188063	0.00594578	0.00829191	0.0088122	-0.000833673
2207.1	0.00411958	0.0104548	0.00780261	0.00155843	0.0101816	0.000856449
2209.1	0.00481096	0.00105744	0.00393325	-0.00267439	0.0151957	0.000146445
2211.09	0.00463757	0.0119968	0.00332474	0.0113578	0.0168098	0.00339634
2213.08	0.00804764	0.00685632	0.00295483	0.00332003	0.0145382	0.00252609
2215.07	0.000213751	0.00810079	0.00163062	0.00463225	0.00959537	-0.00214427
2217.06	0.00448907	0.00284249	0.00293096	0.0077928	0.00319593	-0.00225475
2219.05	0.00468703	0.00503328	0.00462903	0.00497389	0.0152593	0.00175466
2221.03	0.00056049	0.00237662	0.00569089	0.00726493	0.0144489	0.00308396
2223.02	0.00483631	0.00456783	0.00126518	0.00433753	0.0119389	-0.00114685
2225.01	0.00627038	0.00947867	0.0053493	0.00619388	0.0227904	-0.000977788
2227	0.00585118	0.010488	0.00386633	0.00435391	0.00595011	-0.00288882
2228.98	0.0100039	0.00322098	0.000395149	-0.00129114	0.0163176	0.000560049
2230.97	0.00291275	0.00825073	0.00129822	0.00241383	0.00846719	-0.00271119
2232.95	-0.000965667	0.0020483	0.00657556	0.00448812	0.00693355	0.000137469
2234.94	0.000469241	0.00258555	0.000480048	3.93738e-05	-0.006988	-0.000373954
2236.92	0.00486979	0.0027683	0.00201954	0.00146159	0.00654119	0.000834507
2238.91	-0.00135579	-0.005207	-0.00113322	0.00299265	0.0125408	-0.00391713
2240.89	-4.39414e-05	0.00289801	-0.00110467	0.00365411	-0.00477882	-0.00114884
2242.87	0.000279581	0.00355437	0.00186658	0.00116279	0.000736819	-0.00274066
2244.85	0.00356875	-0.00170084	0.0020543	0.00649942	-0.0185243	-0.00125257
2246.84	0.0020392	2.01116e-05	0.00319649	0.00248631	-0.00256129	-0.00336455
2248.82	0.00792351	0.0018595	-0.00091033	-0.00380981	0.000770866	-0.00247664
2250.8	-0.00274928	0.00251678	0.00301558	-0.00445235	-0.00415525	-0.000308794
2252.78	-0.00131284	0.00553901	-0.003477	-0.00292036	-0.00179287	-0.00114103
2254.76	0.00210076	0.00158555	-0.00225501	-0.00334519	0.0260769	-0.00493334
2256.74	0.00316685	0.0042535	-0.000635314	-0.00463967	0.0116797	-0.00428576
2258.72	0.00509805	-0.0033648	-0.00084473	0.00135024	-0.00174481	-0.00395823
2260.7	-0.00100209	-0.00495286	-0.00423531	-0.00668456	-0.0107959	-0.00399077
2262.67	-0.00290095	-0.00192948	-0.00571707	-0.00873963	0.00177376	0.000976609
2264.65	0.000389947	0.00511413	0.000118092	0.00442621	0.00608509	-0.00369608
2266.63	-0.000149392	-0.00404031	-0.00589678	-0.00295585	-0.0160808	-0.00344884
2268.6	-0.00142993	-0.00302625	-0.00507191	-0.00751105	-0.016626	-0.0106817
2270.58	-0.00122754	-0.0057955	-0.00170196	-0.00521676	-0.00210923	-0.00407455
2272.55	0.00317612	0.00207673	-0.00596688	-0.00618389	0.0136231	-0.00718749
2274.53	-0.000575121	-0.000573814	-0.00665285	-0.00802065	0.000691859	-0.0048605
2276.5	0.00135765	-0.00227823	-0.0051914	-0.00224688	0.00063628	-0.00417358
2278.48	0.00131362	0.0022841	-0.00301406	-0.00604028	0.00495422	-0.00528669
2280.45	-0.00614394	-0.00107515	-0.0081535	-0.0029842	0.00781555	-0.00687988
2282.42	0.00196746	-0.0026606	-0.00812332	-0.00547265	-0.000739338	-0.0063131
2284.4	0.00217108	0.00438538	-0.00268497	-0.00491682	-0.000305316	-0.00782639
2286.37	-0.00355608	-0.00358432	-0.00806272	-0.0103404	-0.0105587	-0.00997971
2288.34	-0.00421703	-0.00174024	-0.0052487	-0.00054307	0.00615273	-0.0071731
2290.31	-0.00154163	-0.00391591	-0.00593394	-0.00661865	-0.0147873	-0.00804652
2292.28	-0.00529126	-0.00313544	-0.00773251	-0.00530112	0.000954472	-0.00315998
2294.25	-0.00558099	-0.00270944	-0.00491819	-0.00441831	0.00090741	-0.00327349
2296.22	-0.00685903	-0.00523911	-0.0098183	-0.00494872	-0.0161431	-0.00806705
2298.19	-0.00801332	-0.0113156	-0.00708331	-0.00428302	-0.0115728	-0.00822063
2300.16	-0.00521346	-0.00781473	-0.00808618	-0.0129671	-0.0184187	-0.00845425
2302.12	-0.00772657	-0.00585068	-0.00702115	-0.00632144	-0.0140895	-0.00732791
2304.09	-0.00579127	-0.00625111	-0.00531977	-0.0137005	-0.00708715	-0.00852159
2306.06	-0.00397936	-0.00818835	-0.00497031	-0.00422784	-0.0158736	-0.00939531
2308.02	-0.00389712	-0.00468651	-0.0060523	-0.0101932	-0.00595436	-0.00890906
2309.99	-0.0103635	-0.000356741	-0.0057026	-0.00539512	-0.00963759	-0.00810281
2311.95	-0.00768607	-0.0111609	-0.00829547	-0.0107078	-0.018907	-0.00977662
2313.92	-0.00439068	-0.00304713	-0.00929762	-0.00917101	-0.0272039	-0.0109704
2315.88	-0.00579045	-0.00427372	-0.00465295	-0.00969969	-0.00513487	-0.00560428
2317.85	-0.00780784	-0.00597297	-0.00621157	-0.0134898	-0.00832845	-0.00667813
2319.81	-0.00883655	-0.00152374	-0.0111104	-0.00966931	-0.0321692	-0.00763201
2321.77	-0.0117185	-0.0150461	-0.00344322	-0.0093277	-0.0266159	-0.00554591
2323.74	-0.00780437	-0.0116605	-0.00905758	-0.00996436	-0.0205757	-0.0134198
2325.7	-0.00759691	-0.00721046	-0.00727547	-0.00559976	-0.0099191	-0.00825373
2327.66	-0.0052887	-0.00465197	-0.0141621	-0.00938893	-0.0213672	-0.00628765
2329.62	-0.00495731	-0.0032756	-0.00522196	-0.00937275	-0.0058503	-0.0079216
2331.58	-0.00734407	-0.00852015	-0.00765461	-0.0101174	-0.021669	-0.00911553
2333.54	-0.0112134	-0.0104538	-0.0071445	-0.00586074	0.00162323	-0.00674947
2335.5	-0.00618608	-0.00387433	-0.00719101	-0.00867071	-0.036785	-0.0133834
2337.46	-0.0101786	-0.00651693	-0.0114525	-0.0056096	-0.0297665	-0.0106174
2339.42	-0.00243253	-5.51156e-05	-0.0149186	-0.00624477	-0.0229899	-0.00681132
2341.37	-0.00667178	-0.00553485	-0.00550051	-0.0101413	-0.00795306	-0.00972526
2343.33	-0.00918098	-0.0106596	-0.00697809	-0.0134941	-0.0281386	-0.0102792
2345.29	-0.00205217	-0.0115277	-0.00853504	-0.00901891	-0.0130998	-0.00555315
2347.24	-0.0109862	-0.00991248	-0.0076264	-0.0148718	-0.0325546	-0.0145471
2349.2	-0.00842878	-0.00995233	-0.00846732	-0.0105049	-0.00391054	-0.00646099
2351.16	-0.0100723	-0.00384365	-0.00596781	-0.00798606	0.00165724	-0.0132149
2353.11	-0.0140633	-0.0121595	-0.00601315	-0.0126425	-0.0219243	-0.0120088
2355.07	-0.00718061	-0.00723264	-0.0110688	-0.00870985	-0.0250997	-0.00700266
2357.02	-0.0122833	-0.00502496	-0.00928469	-0.01217	-0.00859766	-0.0125565
2358.97	-0.00552378	-0.0097929	-0.0062279	-0.0136729	-0.0227024	-0.0120303
2360.93	-0.00778412	-0.00356467	-0.00865864	-0.0109356	-0.0222311	-0.0118642
2362.88	-0.0114034	-0.00632209	-0.0056016	-0.0108073	-0.0181151	-0.011138
2364.83	-0.0141576	-0.00446805	-0.00835019	-0.00915675	-0.00768219	-0.00889173
2366.78	-0.00826233	-0.00935318	-0.00998521	-0.00348336	-0.0137668	-0.0132055
2368.73	-0.00632078	-0.00395151	-0.010109	-0.0133567	-0.0171783	-0.0118792
2370.68	-0.00820947	-0.011792	-0.00999403	-0.015402	-0.0249614	-0.00983288
2372.63	-0.0118278	-0.0141934	-0.00534567	-0.0100541	-0.00990919	-0.0119065
2374.58	-0.0107506	-0.0121015	-0.00841165	-0.0132949	-0.0266783	-0.0143801
2376.53	-0.0030009	-0.0055164	-0.00829627	-0.0117518	-0.0402886	-0.00725374
2378.48	-0.00834852	-0.0101634	-0.00993041	-0.0108608	-0.0152737	-0.0126473
2380.43	-0.00875348	-0.0107902	-0.0114054	-0.00518588	-0.0157644	-0.0140008
2382.37	-0.00915823	-0.00751485	-0.00468844	-0.0109263	-0.0145537	-0.0115143
2384.32	-0.0132696	-0.0109787	-0.00497013	-0.0113393	-0.0203867	-0.0128677
2386.27	-0.00836085	-0.0116046	-0.0110574	-0.00957767	-0.0211173	-0.00966108
2388.21	-0.0114834	-0.00939261	-0.00974817	-0.00553271	0.00341651	-0.0121344
2390.16	-0.00163171	-0.0106091	-0.0109042	-0.000291577	-0.00581438	-0.00764772
2392.1	-0.0179749	-0.00709598	-0.0132531	-0.0109233	-0.0135868	-0.010841
2394.05	-0.00466314	-0.00843022	-0.00836449	-0.0104654	-0.0145565	-0.00679416
2395.99	-0.00902048	-0.0109465	-0.00936101	-0.0127253	-0.0150394	-0.0110673
2397.93	-0.00757021	-0.00211191	-0.0101983	-0.0146587	-0.0215943	-0.0109404
2399.88	-0.00698468	-0.00793826	-0.00880859	-0.00822057	-0.0211035	-0.0096934
2401.82	-0.00714032	-0.0106902	-0.00725967	-0.00950128	-0.0101663	-0.00952639
2403.76	-0.0142152	-0.00445595	-0.00483573	-0.0116515	-0.017447	-0.0125193
2405.7	-0.0060918	-0.0118185	-0.00455896	-0.0153236	-0.0103945	-0.00743215
2407.64	-0.00908875	-0.00877606	-0.00308906	-0.0116024	-0.00577023	-0.00742494
2409.59	-0.00627809	-0.0119998	-0.0121171	-0.00766365	-0.0208214	-0.00885766
2411.52	-0.0074212	-0.00907503	-0.00873812	-0.00959549	-0.0152235	-0.0130103
2413.46	-0.00226247	-0.00898761	-0.0114033	-0.00978757	-0.0207989	-0.0104029
2415.4	-0.0102011	-0.00594402	-0.00667201	-0.010523	-0.0193286	-0.00907543
2417.34	-0.00751316	-0.00526486	-0.00790534	-0.00734431	-0.0176145	-0.0134679
2419.28	-0.00803765	-0.0055313	-0.00730928	-0.00731823	0.00377711	-0.00754025
2421.22	-0.00448439	-0.0117092	-0.00623587	-0.0113145	-0.0263292	-0.00881255
2423.15	-0.00698546	-0.00700921	-0.00738915	-0.00726535	-0.00347811	-0.0108048
2425.09	-0.00355536	-0.00467361	-0.0052815	-0.00745598	-0.0250802	-0.0126769
2427.03	-0.00877437	0.002037	-0.0100929	-0.00362374	-0.00587101	-0.011749
2428.96	-0.00670304	-0.0044945	-0.0042469	-0.00327028	-0.0145965	-0.011421
2430.9	-0.00920328	-0.00960688	-0.00714917	-0.00367761	-0.0218634	-0.0113329
2432.83	0.000652864	-0.0112901	-0.00694956	-0.00604164	-0.0109105	-0.0129247
2434.77	-0.00481244	-0.00410542	-0.00738601	-0.0103624	-0.0269206	-0.0124364
2436.7	-0.00484082	-0.00389631	-0.00543633	-0.00272368	-0.0171802	-0.0131081
2438.63	-0.00165639	-0.00806164	0.000490046	-0.00595672	-0.0210424	-0.0137396
2440.57	-0.00403203	-0.00406842	-0.00328617	-0.00603663	-0.0246606	-0.0107311
2442.5	-0.000847186	-0.00858787	-0.0070622	-0.00763836	-0.00568645	-0.00752246
2444.43	-0.00458159	-0.00459407	-0.00487323	-0.00304281	-0.00663062	-0.00639374
2446.36	-0.00386755	-0.01065	-0.00697872	-0.00594864	-0.0170476	-0.0097849
2448.29	-0.00599523	-0.00263557	-0.00614141	-0.00689728	-0.0192044	-0.00981598
2450.22	-0.00688708	-0.00833621	-0.00578109	-0.00632359	-0.0233035	-0.013367
2452.15	-0.00221844	-0.00079413	-0.00184167	-0.00498857	-0.0152557	-0.00835783
2454.08	-0.00619891	-0.00200122	-0.0109452	-0.0080021	-0.0142516	-0.0064286
2456.01	-0.00622519	-0.00699155	-0.0101071	-0.000469551	-0.00960268	-0.0114993
2457.94	-0.000814546	-0.00583331	-0.00219056	-0.011854	-0.0112686	-0.00700983
2459.86	-0.00491794	-0.00408362	-0.00540819	-0.00769119	-0.0126907	-0.00736029
2461.79	-0.00160743	0.000149331	-0.00425142	-0.00385431	-0.019699	-0.0126306
2463.72	-0.00669889	-0.0108698	-0.00929786	-0.00643162	-0.0041147	-0.0102609
2465.64	-0.0100603	-0.00297096	-0.00440275	-0.00357268	-0.0135501	-0.00653098
2467.57	-0.00563706	-0.00677713	-0.00555177	-0.000822176	0.00859493	-0.00820097
2469.49	0.000516231	-0.00715417	-0.00216736	-0.0073126	-0.0103123	-0.00547086
2471.42	0.000244527	-0.00693974	-0.00427038	0.00120057	-0.00468382	-0.00518064
2473.34	-0.00620505	-0.00495145	-0.0056574	-0.0120299	-0.0121719	-0.00509028
2475.27	-0.00264591	-0.00485465	-0.00950971	-0.00373362	-0.00581261	-0.00643981
2477.19	-0.00810656	-0.00144692	-0.00628353	-0.00837469	-0.00479653	-0.00782921
2479.11	-0.00541192	-0.0026501	0.00123749	-0.00290457	0.00933815	-0.0015785
2481.04	0.00222541	-0.00468061	-0.00404574	-0.00460965	0.00889871	-0.00552764
2482.96	-0.00496446	0.00144743	-0.00177335	0.00183951	-0.0104874	-0.000916676
2484.88	-0.00511109	-0.002356	-0.00459072	-0.000734765	0.00753697	-0.00134556
2486.8	-0.00253915	0.000934995	-0.00701025	-0.00254775	-0.00650295	-0.00101434
2488.72	-0.00120261	-0.00334077	0.00051183	-0.00185987	0.00302128	0.000397041
2490.64	-0.00690887	-0.00300505	-0.00238447	-0.000519408	-0.0146604	0.00112853
2492.56	-0.000876539	-0.00125018	-0.00027008	0.0010388	0.00191045	-0.00169982
2494.48	0.000584221	-0.000913822	-0.00292734	0.00216241	0.00973725	-0.00168804
2496.4	-0.00129097	0.00415225	-0.0047891	0.00122061	0.00930579	-0.000956131
2498.31	0.000540912	0.00567158	0.00193871	-0.00352607	0.0212642	-0.00146407
2500.23	0.000396023	0.00116118	-0.00119512	-0.00522832	0.00650254	-0.00217188
2502.15	-0.0034555	0.00138054	-0.00329481	-0.00345124	-0.000727626	-0.00211953
2504.06	0.000230469	0.00171843	0.0020816	-0.0023262	0.0100192	-0.00806705
2505.98	0.00243392	-0.00196337	-0.00311937	0.00282178	0.0154228	0.00266559
2507.9	0.00340196	-0.00706368	0.000110162	-0.000183921	0.0123253	0.00403838
2509.81	0.00523517	-0.00128601	-0.00326118	-0.00188472	0.00849997	-0.000188696
2511.72	0.00373242	0.00283669	-0.000906052	-0.00173696	0.00516153	-0.0010556
2513.64	-0.000364899	0.00152085	-0.00539039	0.00189011	0.0142129	-0.00232237
2515.55	0.00616431	0.0046983	-0.00112607	0.000951266	0.0227795	0.00525103
2517.47	-0.00275147	0.00373779	0.00377469	-0.00227042	0.0138569	0.00402457
2519.38	0.00167764	0.00254114	-0.00245864	-0.00440458	0.00444955	0.00187828
2521.29	0.00141162	0.00193599	-0.000738646	-0.000993728	0.0122904	0.00229216
2523.2	0.00596474	0.0038141	0.000424833	-0.00225755	0.0257194	0.00610618
2525.11	0.00112738	0.0022637	0.00294059	-0.00841344	0.0121854	0.00388038
2527.02	0.00234478	0.00307831	0.0035478	-0.0028273	-0.00304805	0.00325472
2528.93	0.00269747	-0.00107264	0.0055073	0.00210684	0.0125702	0.00430925
2530.84	0.00774572	0.00447206	-0.000804195	0.00606281	0.00972771	0.00556395
2532.75	0.00365064	0.00729765	0.00266682	-0.000200594	0.00299946	-0.000421203
2534.66	-0.00130916	0.0082318	0.00112765	-0.000266639	0.0195925	0.00515383
2536.57	-0.00330324	0.00656506	6.58672e-05	0.00195072	-0.0029235	0.00600903
2538.48	0.00582345	-0.00113135	-0.000200347	0.0102567	0.0056552	0.00422441
2540.38	0.00654818	-0.00433451	-0.00189791	0.000189366	0.0193362	0.00215995
2542.29	-0.00285894	0.00156683	0.00364211	0.00512568	0.00556836	0.00473568
2544.19	0.00206734	-0.000926246	0.00178598	0.0023432	0.0122067	0.0058316
2546.1	0.00192781	0.00414807	0.00167975	-0.0027221	0.0125302	0.0118077
2548.01	0.00351837	0.00260153	-0.00701557	-0.00322083	0.00653884	0.00682395
2549.91	0.00127875	0.00235589	0.0011499	0.00204288	0.0236257	0.00888039
2551.81	0.00237552	0.00057353	0.00152159	0.011547	0.0074338	0.00901703
2553.72	0.00409033	-0.00120852	0.000939133	0.00213418	0.0254944	0.0119538
2555.62	0.00259276	0.00646863	0.00831004	0.00794247	0.0173208	0.00457086
2557.52	-0.00322924	-0.00086985	0.00247902	-0.000708666	0.0176504	0.010948
2559.43	0.00429366	-0.00158678	0.00635105	0.00455667	0.0170093	0.0144854
2561.33	0.00996336	0.00195308	0.00632628	0.00634328	0.0178267	0.010103
2563.23	0.00142369	0.00561153	0.00407491	0.00802151	0.0259328	0.0138808
2565.13	0.00326343	0.00406792	0.0052436	0.00665589	0.0248089	0.0194988
2567.03	0.0034971	0.0129294	0.0107072	0.00768246	0.0261152	0.0178369
2568.93	0.00200114	0.000390526	0.00296896	0.00533902	0.0121187	0.0128553
2570.83	0.00693062	0.00452324	0.00731966	0.00734472	0.00808282	0.0155939
2572.73	0.00419951	0.00794685	0.00777356	0.00619785	0.0334412	0.0143326
2574.63	0.00653466	0.00522255	0.00727338	0.00820422	0.0211481	0.0150316
2576.52	0.00281551	0.00415387	0.0128973	0.00814521	0.0195445	0.0198507
2578.42	0.00836373	0.0115985	0.00420593	0.00819528	0.0228003	0.0211501
2580.32	0.00662203	0.00426401	0.0128525	0.0120509	0.0265429	0.0170497
2582.22	0.00871098	0.00496987	0.0106832	0.012319	0.0288291	0.0223095
2584.11	0.00313934	0.00307489	0.0106615	0.0136747	0.035003	0.0238895
2586.01	0.00522876	0.00224435	0.013185	0.0123128	0.0312182	0.0251897
2587.9	0.00385869	0.0119371	0.0119708	0.0122558	0.0225761	0.0221301
2589.8	0.00804912	0.00566844	0.0108364	0.0141561	0.0282672	0.0199908
2591.69	0.0137225	0.00732186	0.010259	0.0135562	0.0359026	0.0221716
2593.58	0.0119825	0.00980329	0.0114315	0.0149136	0.0316361	0.0198727
2595.48	0.0091306	0.0153592	0.00966161	0.0133359	0.0246985	0.021374
2597.37	0.0083795	0.00743651	0.0145726	0.0171945	0.035252	0.0266355
2599.26	0.0138067	0.00578069	0.0107355	0.00985536	0.026616	0.0252572
2601.15	0.00947281	0.0137023	0.0104775	0.0181722	0.0320704	0.0235592
2603.04	0.0152712	0.0144119	0.0149121	0.0145302	0.0212501	0.0257014
2604.93	0.00883721	0.01323	0.0173587	0.0188251	0.0393383	0.0320438
2606.82	0.0153774	0.00495436	0.014636	0.0129007	0.0338643	0.0269064
2608.71	0.00820255	0.0109856	0.0147768	0.0226322	0.038594	0.0245293
2610.6	0.0120249	0.0124059	0.0153154	0.0191004	0.0336079	0.0235124
2612.49	0.0175773	0.0107525	0.0218192	0.0181781	0.0407688	0.0283757
2614.38	0.0133686	0.00898117	0.0155187	0.0204091	0.0287402	0.0285593
2616.27	0.0120021	0.0101661	0.0250452	0.023184	0.0395469	0.0287431
2618.15	0.0140955	0.011706	0.0187453	0.026068	0.0185323	0.0339671
2620.04	0.0103818	0.016084	0.0189672	0.0187327	0.0239969	0.0294714
2621.93	0.0132171	0.0130135	0.0218139	0.0271621	0.0141586	0.0335759
2623.81	0.00740328	0.0150274	0.0186165	0.0255896	0.0295849	0.0336806
2625.7	0.0160464	0.0103022	0.0279057	0.018799	0.0350525	0.0349056
2627.58	0.0146813	0.015864	0.0238341	0.0248376	0.0276465	0.0328509
2629.47	0.0251784	0.0152777	0.0250117	0.0287023	0.0365171	0.0340764
2631.35	0.0114576	0.011736	0.025951	0.0278923	0.0240119	0.0368221
2633.23	0.016642	0.0171805	0.0216416	0.0313227	0.0348278	0.0327281
2635.12	0.0149072	0.0124571	0.0272738	0.0309484	0.0410294	0.0335943
2637	0.0186093	0.0113993	0.0258281	0.0269866	0.0392157	0.0366608
2638.88	0.00958483	0.0194461	0.0282797	0.0322664	0.0437189	0.0344475
2640.76	0.0141524	0.0201626	0.0259596	0.0279792	0.0266033	0.0356745
2642.64	0.0195851	0.0233623	0.02531	0.028476	0.0235781	0.0382217
2644.52	0.0127855	0.0191136	0.0256946	0.0349528	0.0302706	0.0341692
2646.4	0.0180951	0.0160476	0.0240117	0.0304493	0.0335634	0.036637
2648.28	0.016362	0.0177114	0.0275781	0.0317083	0.0470597	0.040745
2650.16	0.0183359	0.0202032	0.0294747	0.0397083	0.0435528	0.0392132
2652.04	0.0194452	0.0132364	0.0346323	0.0274868	0.0509782	0.0392018
2653.92	0.0135117	0.0229413	0.0266676	0.0252678	0.0309549	0.0392306
2655.8	0.0252478	0.0155023	0.0306328	0.0253324	0.0532004	0.0412196
2657.67	0.0214153	0.0230796	0.0288721	0.026702	0.0438676	0.040489
2659.55	0.0214135	0.0262826	0.0313268	0.0384003	0.0454671	0.0463185
2661.43	0.0195585	0.0267665	0.0341795	0.0412927	0.0587278	0.0448684
2663.3	0.0256117	0.0222848	0.032022	0.0376622	0.046483	0.0453385
2665.18	0.0241279	0.0257253	0.0304215	0.0399031	0.0629037	0.0467689
2667.05	0.0198025	0.028575	0.0323207	0.0398612	0.0547906	0.0437996
2668.93	0.0186898	0.029415	0.0303231	0.0451469	0.0576099	0.0455906
2670.8	0.0223963	0.0274177	0.0336545	0.0457581	0.0776775	0.0469418
2672.67	0.0231376	0.0283767	0.0349978	0.0399552	0.062037	0.0516133
2674.55	0.0312929	0.0317008	0.0330807	0.0404584	0.0726328	0.0500051
2676.42	0.0258566	0.0320693	0.0403895	0.0455282	0.0778855	0.0516371
2678.29	0.0225211	0.0255805	0.0348146	0.0462497	0.077552	0.0632295
2680.16	0.0282058	0.0290238	0.0429192	0.0477325	0.0628874	0.0575021
2682.03	0.0246237	0.0271469	0.0440255	0.0451931	0.0674144	0.061295
2683.9	0.0287026	0.0336652	0.0446549	0.0443936	0.0709707	0.0680882
2685.77	0.0289514	0.0335625	0.0420238	0.0467474	0.0827874	0.0673217
2687.64	0.027347	0.0396085	0.0393135	0.0431219	0.0686127	0.0732755
2689.51	0.0343921	0.0331219	0.0430455	0.0535218	0.0894194	0.0757495
2691.38	0.0271044	0.0351486	0.0453463	0.0537023	0.0995388	0.0747439
2693.25	0.0326673	0.0329192	0.0439094	0.052796	0.109659	0.0839785
2695.11	0.0337823	0.0330549	0.0475628	0.0562389	0.112007	0.0852135
2696.98	0.0402106	0.0361468	0.0522504	0.0562032	0.139134	0.0910087
2698.85	0.0367543	0.0387661	0.0510531	0.0529063	0.142941	0.0915642
2700.71	0.0366344	0.0456423	0.0557413	0.0496098	0.110798	0.0983601
2702.58	0.0398509	0.0298176	0.0500908	0.0542502	0.134041	0.0913162
2704.44	0.0524583	0.0428428	0.0620965	0.0575864	0.141496	0.0952326
2706.31	0.038006	0.0419165	0.04571	0.0569003	0.145308	0.107869
2708.17	0.0415939	0.0386259	0.0556485	0.061107	0.148149	0.105746
2710.04	0.0486418	0.0333256	0.0562028	0.0581387	0.128399	0.100024
2711.9	0.0440752	0.042214	0.0540532	0.0628898	0.140717	0.105621
2713.76	0.0501351	0.0462551	0.0624816	0.06775	0.136759	0.110339
2715.62	0.0480403	0.0403648	0.0628777	0.0679357	0.153937	0.117818
2717.49	0.0502703	0.0410961	0.0600133	0.0645341	0.17403	0.115856
2719.35	0.0520063	0.0439559	0.071942	0.0811373	0.164003	0.127015
2721.21	0.0457111	0.0500085	0.0646246	0.0702348	0.165394	0.124014
2723.07	0.0535021	0.047785	0.0727364	0.0828161	0.170672	0.140654
2724.93	0.0561039	0.0527742	0.0788603	0.0895271	0.173766	0.145893
2726.79	0.0593236	0.0576455	0.0838712	0.0946076	0.163743	0.154774
2728.65	0.0559949	0.0606255	0.0849057	0.0991449	0.191859	0.157774
2730.5	0.0550141	0.0574575	0.0896786	0.098138	0.187425	0.165375
2732.36	0.0604588	0.0646947	0.0969172	0.116918	0.179834	0.171136
2734.22	0.0587371	0.061291	0.105588	0.108084	0.201395	0.179017
2736.08	0.0650472	0.064036	0.103124	0.114145	0.194049	0.189579
2737.93	0.0688863	0.0700919	0.105592	0.119446	0.199822	0.187581
2739.79	0.0697602	0.0644429	0.104402	0.121159	0.206325	0.194943
2741.64	0.0705108	0.0741649	0.108143	0.11461	0.216472	0.187906
2743.5	0.0711381	0.0784485	0.112759	0.114802	0.227349	0.188109
2745.35	0.0773259	0.0800129	0.109422	0.118038	0.224381	0.185193
2747.21	0.0817841	0.075666	0.106802	0.113121	0.231617	0.200636
2749.06	0.084142	0.0700189	0.112771	0.11962	0.237882	0.19276
2750.91	0.0857588	0.0837628	0.114127	0.116225	0.250221	0.192565
2752.77	0.0930597	0.0884029	0.115405	0.123704	0.293898	0.186729
2754.62	0.0966541	0.0796828	0.107934	0.11694	0.275874	0.190734
2756.47	0.0979009	0.0842054	0.11462	0.112569	0.269997	0.19434
2758.32	0.0965533	0.0951132	0.106832	0.119613	0.283312	0.195665
2760.17	0.0980478	0.0921877	0.108986	0.115351	0.306588	0.194391
2762.02	0.108439	0.090918	0.106289	0.117069	0.299985	0.193078
2763.87	0.101038	0.0927227	0.107886	0.11694	0.294113	0.190765
2765.72	0.108588	0.0967743	0.109564	0.113984	0.305489	0.199652
2767.57	0.108106	0.0907763	0.104561	0.109832	0.303991	0.195139
2769.42	0.105648	0.0941192	0.108943	0.10666	0.306138	0.202907
2771.27	0.104796	0.0884766	0.108554	0.116425	0.312172	0.197915
2773.12	0.0985083	0.0827162	0.107449	0.124343	0.301933	0.208883
2774.96	0.0975337	0.0883068	0.104515	0.108125	0.296552	0.213732
2776.81	0.101749	0.0930701	0.1155	0.121262	0.305991	0.211381
2778.65	0.100775	0.093932	0.104455	0.11994	0.301099	0.224751
2780.5	0.095847	0.0840348	0.115599	0.119488	0.314669	0.222161
2782.35	0.0917844	0.0887993	0.106464	0.11708	0.295446	0.214491
2784.19	0.0984719	0.0803217	0.112678	0.114672	0.309748	0.227461
2786.03	0.093792	0.0803575	0.107201	0.119657	0.303888	0.218472
2787.88	0.0867647	0.0827584	0.110155	0.110944	0.315033	0.222364
2789.72	0.0922174	0.0728632	0.108577	0.114843	0.312091	0.221175
2791.56	0.0953226	0.0807037	0.105248	0.113089	0.321295	0.233027
2793.41	0.0926208	0.0829876	0.0996143	0.106443	0.327585	0.22948
2795.25	0.0941203	0.0820794	0.103604	0.103603	0.335091	0.239492
2797.09	0.107358	0.0789252	0.104889	0.114353	0.346242	0.232265
2798.93	0.0978614	0.0807372	0.103074	0.119776	0.36541	0.240479
2800.77	0.10208	0.0868062	0.106428	0.110414	0.367089	0.250333
2802.61	0.111612	0.0867272	0.104215	0.113229	0.380915	0.257347
2804.45	0.105946	0.085821	0.107093	0.115609	0.382839	0.260721
2806.29	0.106582	0.0853881	0.107267	0.114511	0.409299	0.266856
2808.13	0.111544	0.0838915	0.112213	0.115588	0.403695	0.277392
2809.96	0.108597	0.0938642	0.117558	0.118295	0.419954	0.292527
2811.8	0.115659	0.0850378	0.12338	0.126114	0.45079	0.301023
2813.64	0.116543	0.09442	0.122919	0.125778	0.443731	0.31124
2815.47	0.118293	0.0990732	0.128344	0.126313	0.445176	0.319457
2817.31	0.117942	0.101599	0.125816	0.136633	0.464597	0.334634
2819.15	0.121669	0.0995132	0.130526	0.126406	0.494465	0.350931
2820.98	0.118477	0.0918711	0.137224	0.138901	0.506359	0.358429
2822.82	0.123934	0.0946341	0.145036	0.146613	0.506593	0.378208
2824.65	0.120866	0.0994075	0.144896	0.148346	0.500512	0.398906
2826.48	0.126572	0.102881	0.151993	0.158234	0.552247	0.402565
2828.32	0.127211	0.105527	0.159648	0.163229	0.541553	0.415945
2830.15	0.132175	0.1077	0.169211	0.170074	0.555881	0.430805
2831.98	0.136028	0.108219	0.171935	0.181702	0.580413	0.452185
2833.81	0.126906	0.110038	0.176727	0.184851	0.583811	0.455966
2835.64	0.13669	0.110439	0.187087	0.190826	0.623163	0.483667
2837.48	0.140667	0.112023	0.193868	0.195063	0.603729	0.492088
2839.31	0.138096	0.11006	0.19906	0.207781	0.62875	0.50427
2841.14	0.144297	0.127252	0.211965	0.219737	0.66689	0.529692
2842.97	0.143579	0.118905	0.219702	0.232891	0.665193	0.543955
2844.79	0.149905	0.134442	0.232848	0.239195	0.692647	0.563138
2846.62	0.151288	0.12787	0.249174	0.258981	0.716944	0.589201
2848.45	0.150201	0.141162	0.26232	0.268439	0.69533	0.624505
2850.28	0.159369	0.144522	0.273558	0.291488	0.723273	0.663729
2852.11	0.163595	0.154622	0.291318	0.318777	0.728383	0.673153
2853.93	0.166709	0.160702	0.30534	0.345957	0.755599	0.736018
2855.76	0.175014	0.172458	0.335189	0.370964	0.787917	0.778444
2857.58	0.177264	0.171918	0.362891	0.395537	0.787686	0.84111
2859.41	0.178402	0.176581	0.387969	0.437614	0.826808	0.886736
2861.23	0.185965	0.196023	0.428794	0.471537	0.840425	0.966442
2863.06	0.18834	0.203643	0.472244	0.5259	0.890967	1.05683
2864.88	0.194421	0.218002	0.512673	0.57461	0.89244	1.1481
2866.71	0.201986	0.232007	0.5636	0.65311	0.954401	1.25076
2868.53	0.210415	0.254644	0.630195	0.720956	0.962678	1.37163
2870.35	0.22527	0.273143	0.693211	0.808154	1.02488	1.50726
2872.17	0.224433	0.29578	0.76609	0.881654	1.09778	1.63265
2873.99	0.242378	0.318418	0.838253	0.959721	1.13011	1.76448
2875.81	0.247349	0.335617	0.906281	1.04138	1.18114	1.86123
2877.64	0.273079	0.36133	0.968663	1.08922	1.25599	1.95286
2879.46	0.287441	0.382195	0.987223	1.11999	1.3301	1.97121
2881.27	0.30687	0.408855	1.00252	1.13218	1.39912	1.99816
2883.09	0.327781	0.41707	1.01782	1.14632	1.43971	2.04439
2884.91	0.357342	0.434153	1.03742	1.14753	1.54516	2.02975
2886.73	0.365033	0.450409	1.04206	1.15754	1.59208	2.04794
2888.55	0.408434	0.470094	1.06619	1.18647	1.69535	2.04025
2890.37	0.445163	0.501722	1.08078	1.19724	1.74275	2.067
2892.18	0.477443	0.519634	1.09775	1.22954	1.79525	2.10332
2894	0.497862	0.54535	1.12268	1.25967	1.83269	2.14003
2895.81	0.51025	0.577688	1.15134	1.28425	1.86114	2.17051
2897.63	0.521402	0.573492	1.16943	1.3097	1.87721	2.17006
2899.44	0.520446	0.573789	1.20342	1.35636	1.86364	2.20834
2901.26	0.515783	0.584609	1.23312	1.38638	1.86587	2.26089
2903.07	0.501606	0.587508	1.25097	1.41129	1.8404	2.29193
2904.89	0.516961	0.604714	1.28441	1.47197	1.82538	2.38577
2906.7	0.50056	0.623812	1.33153	1.51917	1.85821	2.43892
2908.51	0.522464	0.62754	1.38477	1.58311	1.88983	2.55648
2910.32	0.532012	0.656807	1.45981	1.6564	1.8753	2.69084
2912.14	0.53427	0.680518	1.53484	1.7535	1.94676	2.80748
2913.95	0.561735	0.711086	1.61576	1.85159	2.00754	2.93411
2915.76	0.598962	0.742956	1.70328	1.93303	2.06953	3.03991
2917.57	0.61889	0.781329	1.77657	2.02949	2.14852	3.18283
2919.38	0.663778	0.828925	1.85479	2.1304	2.21124	3.29899
2921.19	0.692974	0.881014	1.9649	2.25262	2.26546	3.48611
2922.99	0.715992	0.909811	2.0688	2.37462	2.31385	3.61964
2924.8	0.749637	0.965093	2.16762	2.49847	2.3603	3.77112
2926.61	0.774509	1.00891	2.29594	2.64276	2.40359	3.87868
2928.42	0.79827	1.04515	2.388	2.73389	2.41118	4.00632
2930.23	0.812516	1.07904	2.46018	2.8086	2.46564	4.0578
2932.03	0.83986	1.11848	2.52599	2.87831	2.47396	4.12689
2933.84	0.859297	1.14468	2.58664	2.954	2.48713	4.18857
2935.64	0.87132	1.16295	2.64124	3.02611	2.50298	4.2213
2937.45	0.900519	1.20594	2.70689	3.08516	2.56207	4.27362
2939.25	0.915755	1.23084	2.73207	3.13998	2.58423	4.30511
2941.06	0.964847	1.25503	2.76313	3.18154	2.62923	4.32839
2942.86	0.997259	1.29838	2.79968	3.17199	2.67642	4.26292
2944.66	1.05426	1.33605	2.79908	3.14832	2.75883	4.19984
2946.47	1.11707	1.36438	2.7658	3.12573	2.8857	4.08973
2948.27	1.15331	1.37142	2.70374	3.05748	2.95573	3.96086
2950.07	1.23478	1.4098	2.6299	2.95107	3.06948	3.82147
2951.87	1.29178	1.41898	2.55518	2.84433	3.16987	3.62303
2953.67	1.3237	1.44506	2.47546	2.73097	3.22532	3.49956
2955.47	1.33832	1.41168	2.36544	2.60771	3.22151	3.32801
2957.27	1.337	1.38704	2.27307	2.52076	3.2087	3.21742
2959.07	1.31233	1.35625	2.18619	2.42577	3.17282	3.09483
2960.87	1.27704	1.33008	2.11498	2.34002	3.11386	3.0056
2962.67	1.25731	1.28511	2.05156	2.25829	3.0379	2.92077
2964.47	1.21386	1.25941	2.00787	2.20429	2.97458	2.85382
2966.27	1.19265	1.22378	1.9528	2.16561	2.90639	2.77084
2968.06	1.15191	1.21723	1.90879	2.13238	2.85011	2.72713
2969.86	1.14763	1.1829	1.88204	2.07772	2.74573	2.65114
2971.66	1.12024	1.17281	1.84773	2.05579	2.6314	2.56272
2973.45	1.1041	1.14759	1.81406	2.02767	2.55957	2.53409
2975.25	1.08265	1.14589	1.77983	1.99378	2.47366	2.47126
2977.04	1.06366	1.11866	1.74982	1.97185	2.40572	2.3942
2978.84	1.03788	1.08906	1.71321	1.89546	2.30062	2.33045
2980.63	1.01853	1.06632	1.67565	1.87169	2.24144	2.25735
2982.42	0.994353	1.03743	1.62456	1.83573	2.1531	2.20253
2984.22	0.960048	1.02178	1.56735	1.75053	2.0548	2.10502
2986.01	0.928215	0.982138	1.51865	1.71491	1.97424	2.03248
2987.8	0.889833	0.944029	1.47767	1.66396	1.90267	1.98046
2989.59	0.860101	0.912423	1.43064	1.59322	1.81239	1.86756
2991.38	0.813935	0.8807	1.3716	1.53531	1.70341	1.79689
2993.17	0.786675	0.836917	1.31408	1.4724	1.60391	1.71007
2994.96	0.738285	0.805076	1.26721	1.40906	1.53525	1.61345
2996.75	0.70287	0.776427	1.20388	1.34017	1.42725	1.52999
2998.54	0.674128	0.733473	1.13968	1.28628	1.37973	1.44545
3000.33	0.636613	0.690992	1.08096	1.21457	1.28339	1.36368
3002.12	0.601446	0.676297	1.03115	1.15449	1.23879	1.28514
3003.91	0.584072	0.645522	0.978324	1.08876	1.15678	1.19684
3005.7	0.554466	0.603043	0.912372	1.01911	1.12724	1.13078
3007.48	0.536475	0.575934	0.863679	0.958812	1.06297	1.04537
3009.27	0.512183	0.561123	0.810929	0.902104	1.02469	0.992428
3011.05	0.480106	0.533069	0.767486	0.851811	0.973293	0.922173
3012.84	0.469036	0.512938	0.729769	0.799235	0.94206	0.862437
3014.63	0.441531	0.482639	0.687996	0.763185	0.864916	0.803302
3016.41	0.426013	0.469957	0.656961	0.71659	0.8366	0.755288
3018.19	0.408271	0.452192	0.624733	0.686847	0.816788	0.709954
3019.98	0.397201	0.437856	0.59505	0.6533	0.781186	0.67558
3021.76	0.393422	0.429314	0.573798	0.630298	0.750445	0.639967
3023.54	0.381859	0.420417	0.540299	0.607515	0.737437	0.615155
3025.33	0.388583	0.409748	0.518332	0.58832	0.732204	0.605583
3027.11	0.36936	0.401798	0.509727	0.561515	0.69685	0.568731
3028.89	0.355573	0.390893	0.498021	0.546126	0.696234	0.549081
3030.67	0.362175	0.397369	0.48043	0.539109	0.678615	0.53915
3032.45	0.351725	0.389776	0.473257	0.521764	0.684803	0.52622
3034.23	0.343994	0.376744	0.460757	0.515618	0.663057	0.515571
3036.01	0.347507	0.384285	0.460584	0.513278	0.664146	0.515322
3037.79	0.351762	0.391354	0.474012	0.518549	0.658921	0.521193
3039.57	0.349839	0.395822	0.46716	0.5136	0.65734	0.516506
3041.35	0.355948	0.396507	0.474226	0.530179	0.665477	0.524098
3043.12	0.364158	0.399676	0.479383	0.529471	0.660254	0.545091
3044.9	0.360012	0.400598	0.488916	0.545616	0.689042	0.541925
3046.68	0.364886	0.407669	0.499085	0.553933	0.672161	0.557279
3048.45	0.363583	0.411549	0.500267	0.548009	0.680788	0.561034
3050.23	0.367592	0.427843	0.515288	0.582094	0.671441	0.574869
3052.01	0.372468	0.430186	0.523391	0.583672	0.71335	0.597665
3053.78	0.370918	0.43584	0.54239	0.602429	0.689186	0.616341
3055.55	0.379253	0.438893	0.558367	0.626949	0.699275	0.627738
3057.33	0.389442	0.45519	0.573947	0.650055	0.707179	0.662735
3059.1	0.397284	0.458126	0.586982	0.667835	0.708039	0.679013
3060.88	0.395983	0.463781	0.601767	0.68692	0.698941	0.700211
3062.65	0.398635	0.471802	0.627608	0.699482	0.720937	0.73593
3064.42	0.40376	0.473321	0.636907	0.720308	0.721558	0.745129
3066.19	0.401223	0.4882	0.646762	0.723087	0.716835	0.737449
3067.96	0.412897	0.499297	0.647632	0.720538	0.746608	0.713129
3069.73	0.419258	0.492658	0.639355	0.700378	0.753305	0.70029
3071.5	0.427719	0.512623	0.624638	0.697288	0.770934	0.673052
3073.27	0.428026	0.506104	0.609841	0.67452	0.7599	0.647534
3075.04	0.444396	0.509398	0.587091	0.650991	0.769515	0.595976
3076.81	0.459654	0.514822	0.572772	0.627789	0.79735	0.569059
3078.58	0.474048	0.525448	0.558374	0.602413	0.819356	0.546263
3080.35	0.4856	0.521768	0.545806	0.582039	0.83359	0.499467
3082.12	0.507655	0.535824	0.529182	0.581126	0.859727	0.495391
3083.88	0.522174	0.540539	0.539679	0.577278	0.904328	0.476197
3085.65	0.539781	0.555542	0.522261	0.566908	0.940671	0.466882
3087.42	0.548492	0.5709	0.515182	0.554798	0.951022	0.447328
3089.18	0.576727	0.587322	0.513671	0.543125	1.00364	0.434455
3090.95	0.62399	0.607765	0.5155	0.553847	1.03294	0.432982
3092.71	0.626401	0.607398	0.516535	0.544349	1.07318	0.42947
3094.48	0.64784	0.635054	0.522183	0.54768	1.09884	0.430159
3096.24	0.672616	0.656681	0.522264	0.549598	1.12328	0.412448
3098	0.692944	0.65809	0.517336	0.559019	1.17542	0.422777
3099.77	0.714261	0.671913	0.524735	0.548109	1.18165	0.416827
3101.53	0.735207	0.692359	0.530305	0.562423	1.23088	0.419397
3103.29	0.748616	0.693532	0.53007	0.55532	1.21476	0.404569
3105.05	0.748311	0.707476	0.541606	0.567787	1.26642	0.41922
3106.81	0.756531	0.731233	0.548927	0.570796	1.25954	0.420632
3108.58	0.765987	0.725195	0.542411	0.583807	1.27233	0.425405
3110.34	0.767041	0.738076	0.555698	0.58236	1.2635	0.431578
3112.1	0.771679	0.742326	0.572405	0.596569	1.28407	0.430112
3113.86	0.76878	0.743857	0.574877	0.59534	1.28035	0.433806
3115.61	0.77762	0.756384	0.580133	0.611615	1.29121	0.444621
3117.37	0.78992	0.760635	0.579186	0.619085	1.27485	0.442157
3119.13	0.786527	0.769025	0.592873	0.627642	1.2896	0.443613
3120.89	0.786348	0.782618	0.606243	0.638157	1.30896	0.456509
3122.64	0.802602	0.807088	0.627089	0.638888	1.33002	0.462006
3124.4	0.800446	0.813706	0.62837	0.6506	1.31853	0.462744
3126.16	0.820408	0.823162	0.634981	0.659377	1.36121	0.468082
3127.91	0.836293	0.828125	0.643183	0.677613	1.37086	0.465101
3129.67	0.844888	0.86052	0.651226	0.682587	1.36593	0.47228
3131.42	0.85163	0.85839	0.671518	0.68843	1.39405	0.48282
3133.18	0.872087	0.871985	0.670018	0.698405	1.39447	0.492081
3134.93	0.874381	0.887592	0.675915	0.709686	1.40898	0.483462
3136.69	0.884831	0.90178	0.689925	0.714661	1.43029	0.505163
3138.44	0.897505	0.908756	0.692801	0.714854	1.41419	0.498745
3140.19	0.912774	0.905327	0.696871	0.726353	1.41486	0.506888
3141.94	0.903207	0.915733	0.703009	0.725242	1.43035	0.511111
3143.69	0.917241	0.929923	0.710738	0.750768	1.4196	0.522415
3145.45	0.918919	0.933353	0.719342	0.751615	1.43679	0.525559
3147.2	0.917014	0.937849	0.72063	0.747896	1.44013	0.528264
3148.95	0.919311	0.953931	0.739335	0.763965	1.44615	0.53717
3150.7	0.931987	0.944121	0.748577	0.77188	1.46358	0.545436
3152.45	0.927859	0.947554	0.749469	0.777295	1.43025	0.546262
3154.19	0.933122	0.951223	0.760064	0.794236	1.44598	0.56581
3155.94	0.923804	0.96246	0.76032	0.797913	1.46682	0.559117
3157.69	0.939694	0.964357	0.774018	0.809201	1.46191	0.568986
3159.44	0.929883	0.982098	0.78366	0.821576	1.45846	0.573855
3161.19	0.947874	0.983877	0.784633	0.825146	1.4572	0.587364
3162.93	0.948443	1.0125	0.799764	0.83948	1.46687	0.588874
3164.68	0.961369	1.00695	0.799148	0.84827	1.47192	0.600545
3166.42	0.96787	1.00554	0.811337	0.866193	1.48281	0.604976
3168.17	0.979437	1.02801	0.826787	0.867047	1.50438	0.623728
3169.91	0.975435	1.02057	0.837943	0.869533	1.49074	0.62188
3171.66	0.989721	1.0402	0.843452	0.881151	1.48122	0.623393
3173.4	1.00092	1.05357	0.858108	0.901903	1.51397	0.632426
3175.15	1.00705	1.05642	0.862426	0.900151	1.52997	0.64326
3176.89	1.02838	1.06021	0.871675	0.913945	1.54912	0.645095
3178.63	1.02747	1.07879	0.875835	0.92698	1.58017	0.65673
3180.37	1.03311	1.07856	0.881108	0.93871	1.56338	0.672766
3182.11	1.03516	1.0969	0.908651	0.939243	1.60269	0.667442
3183.86	1.06403	1.10755	0.914005	0.950866	1.59974	0.692519
3185.6	1.07523	1.13157	0.923336	0.96075	1.62789	0.686237
3187.34	1.0863	1.12744	0.926464	0.976614	1.62931	0.696795
3189.08	1.09182	1.14152	0.947647	0.980954	1.65017	0.706794
3190.82	1.10216	1.16329	0.954752	0.993558	1.6516	0.709073
3192.56	1.11966	1.18187	0.962972	1.01073	1.68777	0.727313
3194.29	1.12505	1.1852	0.974373	1.02529	1.7011	0.736153
3196.03	1.13811	1.17303	0.982832	1.01952	1.70229	0.745794
3197.77	1.14745	1.21502	1.00314	1.04931	1.72947	0.766556
3199.51	1.14951	1.21516	1.0085	1.05909	1.73843	0.767718
3201.24	1.16454	1.22664	1.02714	1.07093	1.77193	0.788161
3202.98	1.17562	1.23671	1.0321	1.0855	1.73158	0.791045
3204.72	1.19164	1.23862	1.04788	1.09723	1.78476	0.807129
3206.45	1.19136	1.26571	1.05117	1.10419	1.79518	0.795213
3208.19	1.20552	1.26632	1.05948	1.1181	1.79152	0.813498
3209.92	1.21327	1.28478	1.07343	1.13278	1.7932	0.813984
3211.65	1.23102	1.29249	1.08929	1.13887	1.82695	0.813711
3213.39	1.22357	1.29393	1.09099	1.14746	1.8556	0.842397
3215.12	1.24305	1.30471	1.10232	1.16529	1.84489	0.847165
3216.85	1.25314	1.3318	1.11031	1.16855	1.88399	0.857453
3218.58	1.25545	1.33135	1.11281	1.16083	1.86989	0.854662
3220.32	1.25541	1.32925	1.12247	1.18301	1.90267	0.877591
3222.05	1.26785	1.33979	1.12887	1.20074	1.90897	0.877321
3223.78	1.27325	1.3514	1.14075	1.20368	1.92378	0.880692
3225.51	1.27593	1.35603	1.14509	1.20227	1.9177	0.894543
3227.24	1.29987	1.37781	1.1619	1.21988	1.96579	0.897835
3228.97	1.29884	1.37689	1.16528	1.22891	1.93226	0.905847
3230.7	1.30758	1.37372	1.17494	1.23348	1.98667	0.90578
3232.43	1.2963	1.38451	1.18675	1.25643	1.95922	0.922114
3234.15	1.32381	1.40534	1.19491	1.25665	1.9852	0.927808
3235.88	1.32328	1.40797	1.19033	1.26058	1.98982	0.936743
3237.61	1.33066	1.40634	1.20413	1.26939	2.00245	0.931838
3239.34	1.31815	1.41003	1.19797	1.26646	2.00415	0.953934
3241.06	1.32157	1.40131	1.21002	1.28517	2.00123	0.951911
3242.79	1.33031	1.43231	1.215	1.29475	2.00804	0.965008
3244.51	1.34263	1.43754	1.23707	1.29226	2.05055	0.983346
3246.24	1.34606	1.41156	1.24276	1.31912	2.04084	0.975004
3247.96	1.33923	1.44198	1.24805	1.31631	2.01242	0.997423
3249.69	1.34797	1.46364	1.2574	1.31937	2.05761	1.01236
3251.41	1.36128	1.44263	1.26603	1.33743	2.05228	1.0273
3253.13	1.35581	1.45744	1.26457	1.35288	2.06686	1.0254
3254.86	1.35108	1.47485	1.26994	1.35441	2.06638	1.04831
3256.58	1.37341	1.46802	1.29059	1.35943	2.06615	1.04285
3258.3	1.37857	1.46947	1.28602	1.36216	2.089	1.06131
3260.02	1.37742	1.4753	1.29736	1.38382	2.11403	1.06789
3261.74	1.39037	1.49496	1.30886	1.39623	2.06619	1.08016
3263.46	1.38613	1.48707	1.31647	1.41559	2.10483	1.07986
3265.18	1.38301	1.50366	1.3228	1.42224	2.11408	1.08293
3266.9	1.38508	1.50913	1.33613	1.42552	2.10049	1.11983
3268.62	1.40421	1.49119	1.33761	1.43674	2.13354	1.13434
3270.34	1.38947	1.51133	1.34744	1.44307	2.15786	1.14269
3272.06	1.40341	1.51503	1.34646	1.43276	2.14306	1.15303
3273.78	1.41894	1.51506	1.3648	1.46583	2.13968	1.1697
3275.49	1.40594	1.5261	1.36692	1.45248	2.12998	1.16913
3277.21	1.40653	1.52649	1.36332	1.46544	2.1339	1.18644
3278.93	1.41985	1.53693	1.38325	1.47612	2.16793	1.17815
3280.64	1.42143	1.52987	1.37989	1.49256	2.17476	1.19798
3282.36	1.44141	1.54469	1.39298	1.47997	2.18353	1.20053
3284.07	1.42891	1.54615	1.39558	1.48532	2.2008	1.21572
3285.79	1.44062	1.55092	1.3927	1.49274	2.20302	1.20168
3287.5	1.4333	1.55344	1.40158	1.51038	2.19795	1.21367
3289.22	1.44081	1.55845	1.41675	1.50247	2.21353	1.2283
3290.93	1.4398	1.58355	1.41108	1.51097	2.21915	1.21978
3292.64	1.44768	1.55427	1.40127	1.51785	2.21383	1.20849
3294.35	1.43579	1.56968	1.42089	1.5107	2.23622	1.22133
3296.07	1.46233	1.57847	1.40974	1.51747	2.23941	1.21445
3297.78	1.46404	1.57261	1.41091	1.5225	2.27443	1.224
3299.49	1.45969	1.5801	1.41558	1.52395	2.24434	1.21328
3301.2	1.47869	1.58286	1.41906	1.52724	2.2524	1.2176
3302.91	1.48349	1.58645	1.4192	1.51814	2.26361	1.2044
3304.62	1.47914	1.58803	1.41035	1.50588	2.27483	1.22456
3306.33	1.4738	1.58737	1.42298	1.52103	2.2977	1.20836
3308.04	1.50368	1.6081	1.42487	1.51769	2.28414	1.21852
3309.75	1.50551	1.62116	1.41539	1.52533	2.33399	1.19704
3311.45	1.48226	1.60323	1.41355	1.51678	2.29711	1.2004
3313.16	1.52276	1.60931	1.42816	1.52432	2.33068	1.19565
3314.87	1.53102	1.63667	1.42687	1.51152	2.34068	1.18989
3316.58	1.52705	1.62087	1.43092	1.52297	2.35142	1.19089
3318.28	1.53258	1.62754	1.42064	1.51823	2.33981	1.19246
3319.99	1.54566	1.63717	1.4246	1.51044	2.3384	1.1835
3321.69	1.54725	1.63178	1.41847	1.52352	2.36591	1.16775
3323.4	1.54834	1.64578	1.42227	1.52258	2.3662	1.1766
3325.1	1.5519	1.65694	1.43005	1.52501	2.40415	1.17876
3326.81	1.55744	1.66421	1.41803	1.53071	2.41052	1.17661
3328.51	1.56434	1.66012	1.42796	1.51726	2.439	1.17122
3330.21	1.58558	1.68689	1.43463	1.53764	2.40505	1.17203
3331.91	1.58432	1.67358	1.43748	1.52724	2.46365	1.19256
3333.62	1.5932	1.68215	1.43851	1.54805	2.45132	1.16453
3335.32	1.60665	1.68527	1.43961	1.52515	2.46353	1.16438
3337.02	1.60342	1.69822	1.44223	1.53813	2.48521	1.18207
3338.72	1.61353	1.69212	1.45256	1.53513	2.49183	1.16272
3340.42	1.61969	1.69891	1.43664	1.53496	2.50039	1.1587
3342.12	1.62882	1.71493	1.45254	1.54425	2.50775	1.17471
3343.82	1.63436	1.73461	1.46375	1.54995	2.49955	1.16061
3345.52	1.6341	1.71492	1.45229	1.55749	2.51808	1.15686
3347.22	1.65892	1.73886	1.46413	1.56059	2.52228	1.1604
3348.92	1.65742	1.74542	1.45633	1.55226	2.53474	1.16381
3350.61	1.6626	1.75009	1.46277	1.56721	2.56566	1.17591
3352.31	1.66258	1.73312	1.46611	1.56399	2.57836	1.16833
3354.01	1.66726	1.75305	1.4673	1.5672	2.57746	1.16035
3355.7	1.67824	1.75973	1.47278	1.5542	2.58312	1.1632
3357.4	1.68058	1.76132	1.47978	1.56034	2.60385	1.16454
3359.1	1.70528	1.78172	1.48852	1.57768	2.61607	1.16672
3360.79	1.69488	1.7774	1.47938	1.56838	2.61104	1.14538
3362.49	1.69598	1.77155	1.48669	1.57648	2.62837	1.15829
3364.18	1.70289	1.79361	1.49337	1.57751	2.60561	1.17095
3365.87	1.7051	1.78882	1.49536	1.58322	2.66108	1.14961
3367.57	1.72881	1.80082	1.49894	1.5911	2.64853	1.15431
3369.26	1.71854	1.7997	1.4983	1.58409	2.65784	1.16206
3370.95	1.72829	1.81608	1.50411	1.59404	2.66934	1.1644
3372.64	1.74274	1.81827	1.51087	1.59323	2.68108	1.16659
3374.34	1.72889	1.82803	1.50618	1.58437	2.68068	1.15606
3376.03	1.73036	1.83401	1.50834	1.58584	2.69802	1.17992
3377.72	1.76334	1.83336	1.51001	1.60286	2.70029	1.16131
3379.41	1.75443	1.83721	1.51208	1.59292	2.70062	1.16718
3381.1	1.76752	1.85466	1.51081	1.60548	2.71626	1.15933
3382.79	1.77987	1.85378	1.50811	1.62304	2.73214	1.15688
3384.48	1.77578	1.85799	1.52077	1.59592	2.72737	1.16923
3386.16	1.7838	1.8707	1.51449	1.61088	2.73961	1.1757
3387.85	1.78726	1.87751	1.52977	1.61649	2.73144	1.16065
3389.54	1.79651	1.89496	1.51983	1.62242	2.76482	1.1706
3391.23	1.7902	1.89136	1.52024	1.61335	2.7722	1.15371
3392.91	1.79823	1.89947	1.54546	1.62451	2.77351	1.18295
3394.6	1.80613	1.88535	1.52813	1.62555	2.79086	1.16442
3396.29	1.81391	1.89725	1.53577	1.62061	2.76788	1.17554
3397.97	1.8228	1.87816	1.53435	1.61796	2.79616	1.17993
3399.66	1.82094	1.91241	1.54112	1.62466	2.80112	1.16841
3401.34	1.82587	1.90822	1.54726	1.62853	2.80074	1.16652
3403.02	1.81413	1.92579	1.54536	1.646	2.84675	1.18076
3404.71	1.82833	1.90884	1.54132	1.62726	2.81722	1.178
3406.39	1.84402	1.9166	1.55819	1.64113	2.83676	1.18288
3408.07	1.83512	1.91572	1.52377	1.62	2.84974	1.16984
3409.76	1.84895	1.91532	1.54438	1.63454	2.82434	1.1752
3411.44	1.85204	1.91256	1.54599	1.622	2.83927	1.16072
3413.12	1.86661	1.91666	1.553	1.6449	2.88043	1.168
3414.8	1.8393	1.91307	1.55397	1.64138	2.84872	1.16976
3416.48	1.84622	1.94672	1.55812	1.63124	2.86171	1.17673
3418.16	1.86179	1.92812	1.54971	1.62816	2.86279	1.18953
3419.84	1.86351	1.93103	1.56841	1.63139	2.86218	1.16853
3421.52	1.85165	1.91869	1.5495	1.63179	2.87031	1.17094
3423.2	1.86895	1.92598	1.55334	1.62251	2.85002	1.1623
3424.88	1.86091	1.94746	1.54437	1.62194	2.87079	1.14943
3426.56	1.87203	1.92082	1.55481	1.62397	2.86386	1.16576
3428.23	1.86227	1.93509	1.53717	1.63383	2.87613	1.16068
3429.91	1.86486	1.92937	1.54213	1.62239	2.85973	1.15709
3431.59	1.85201	1.93832	1.53626	1.62127	2.87248	1.1471
3433.26	1.8556	1.92362	1.53374	1.62505	2.86119	1.14919
3434.94	1.83743	1.92524	1.53901	1.626	2.87564	1.14968
3436.61	1.85609	1.92769	1.52702	1.61053	2.87553	1.13629
3438.29	1.84472	1.92671	1.52641	1.60278	2.85865	1.1323
3439.96	1.8493	1.92714	1.53216	1.6058	2.87602	1.13856
3441.64	1.84596	1.89731	1.51731	1.60382	2.84238	1.14229
3443.31	1.84312	1.90083	1.51654	1.59444	2.8498	1.13502
3444.98	1.83484	1.90599	1.50893	1.59257	2.83706	1.1194
3446.66	1.84436	1.90466	1.51007	1.58853	2.85711	1.11933
3448.33	1.82571	1.89647	1.49181	1.57807	2.82105	1.10759
3450	1.81607	1.89171	1.49621	1.565	2.80976	1.13145
3451.67	1.81756	1.88635	1.49385	1.58204	2.79386	1.09798
3453.34	1.81089	1.89342	1.47463	1.56256	2.80687	1.09304
3455.01	1.81633	1.87399	1.48007	1.56482	2.77786	1.08694
3456.68	1.80052	1.8489	1.47644	1.55502	2.78844	1.08556
3458.35	1.80003	1.85951	1.46191	1.55794	2.75992	1.08938
3460.02	1.78891	1.85475	1.45033	1.53563	2.77415	1.07064
3461.69	1.77113	1.82599	1.45052	1.528	2.75048	1.07602
3463.36	1.7867	1.82608	1.44777	1.51309	2.71759	1.08612
3465.03	1.76446	1.83433	1.43722	1.51003	2.75198	1.06439
3466.69	1.7405	1.81763	1.42079	1.49762	2.69893	1.05109
3468.36		1.80081	1.42918	1.50184	2.66968	1.04051
3470.03		1.80445	1.40686	1.49172	2.68999	1.04862
3471.69		1.77061	1.40459	1.47724	2.65832	1.0462
3473.36		1.76349	1.39699	1.48104	2.6349	1.01795
3475.02		1.77339	1.39329	1.46852	2.63384	1.00946
3476.69		1.75492	1.38211	1.45622	2.64443	1.01284
3478.35		1.72723	1.36489	1.43131	2.57535	0.994113
3480.02		1.72815	1.35005	1.43098	2.55291	1.0009
3481.68		1.72494	1.34007	1.42336	2.5572	0.987292
3483.34		1.71558	1.34782	1.40726	2.56148	0.976322
3485.01		1.71059	1.32352	1.37507	2.49896	0.962673
3486.67		1.67817	1.31625	1.38093	2.51564	0.960945
3488.33		1.65876	1.30332	1.36614	2.47256	0.950097
3489.99		1.65152	1.28817	1.33873	2.45401	0.94109
3491.65		1.61828	1.28416	1.33372	2.41264	0.920004
3493.31		1.6198	1.26471	1.31937	2.4349	0.904319
3494.97		1.60724	1.24607	1.30643	2.37093	0.896914
3496.63		1.58086	1.23903	1.30457	2.36624	0.90167
3498.29		1.58734	1.23438	1.30642	2.33944	0.876107
3499.95		1.57278	1.21605	1.27684	2.35831	0.883704
3501.61		1.54864	1.1924	1.26053	2.272	0.867742
3503.27		1.53668	1.20238	1.25346	2.28043	0.851301
3504.92		1.52934	1.18477	1.23194	2.26043	0.862141
3506.58		1.5026	1.16351	1.2265	2.2487	0.839381
3508.24		1.49265	1.16944	1.21356	2.18255	0.808782
3509.89		1.47833	1.14356	1.19704	2.1888	0.821264
3511.55		1.46874	1.12953	1.1766	2.18266	0.810666
3513.2		1.44437	1.11439	1.16562	2.12866	0.805749
3514.86		1.43454	1.10911	1.15921	2.11596	0.782633
3516.51		1.40438	1.08736	1.14736	2.13095	0.767077
3518.17		1.3916	1.07644	1.13769	2.09129	0.774522
3519.82		1.38212	1.06496	1.12106	2.05965	0.758008
3521.47		1.37596	1.04528	1.1003	2.03335	0.729895
3523.13		1.34888	1.04024	1.09803	2.01045	0.722302
3524.78		1.33338	1.02797	1.0889	2.00724	0.72215
3526.43		1.32616	1.01784	1.0551	1.94985	0.731559
3528.08		1.3226	1.01058	1.05826	1.92404	0.714688
3529.73		1.28866	0.99075	1.04174	1.91912	0.708419
3531.38		1.28049	0.987464	1.03121	1.86587	0.68527
3533.03		1.26688	0.974873	1.01632	1.87383	0.677601
3534.68		1.2385	0.956716	1.00361	1.85725	0.672293
3536.33		1.22726	0.948581	0.989925	1.82368	0.657146
3537.98		1.22548	0.939809	0.976456	1.80613	0.64288
3539.63		1.20904	0.924199	0.957878	1.79151	0.636615
3541.28		1.18834	0.907794	0.945063	1.74409	0.63471
3542.92		1.18964	0.897195	0.937901	1.72801	0.617926
3544.57		1.18065	0.883574	0.924109	1.71435	0.609662
3546.22		1.14281	0.869	0.908034	1.70095	0.60228
3547.86		1.1389	0.86238	0.896635	1.65159	0.589818
3549.51		1.13003	0.846057	0.884584	1.65543	0.576516
3551.15		1.11454	0.839517	0.884601	1.65587	0.578216
3552.8		1.09976	0.81723	0.858962	1.59899	0.564716
3554.44		1.09242	0.813873	0.846152	1.58631	0.555057
3556.09		1.07161	0.803279	0.841496	1.57534	0.549799
3557.73		1.05127	0.782664	0.829123	1.54445	0.542061
3559.37		1.04146	0.778831	0.81077	1.52328	0.521444
3561.02		1.03117	0.77134	0.812205	1.49555	0.522748
3562.66		1.02633	0.763531	0.782438	1.50863	0.513412
3564.3		1.00528	0.747373	0.766696	1.46681	0.504438
3565.94		0.990505	0.744019	0.777701	1.46386	0.486384
3567.58		0.969225	0.732156	0.761852	1.43225	0.47545
3569.22		0.960596	0.709637	0.73785	1.41084	0.471198
3570.86		0.955751	0.709944	0.736136	1.38724	0.473826
3572.5		0.944523	0.699435	0.724964	1.37239	0.455415
3574.14		0.945472	0.685108	0.711836	1.37334	0.452244
3575.78		0.912016	0.668079	0.708493	1.31379	0.448835
3577.42		0.895114	0.663775	0.681124	1.33101	0.428946
3579.06		0.882586	0.645236	0.686046	1.30305	0.420618
3580.7		0.879873	0.643478	0.671072	1.30934	0.42077
3582.33		0.858952	0.634563	0.665666	1.22381	0.409603
3583.97		0.857303	0.629068	0.652216	1.23375	0.398437
3585.61		0.851044	0.618166	0.632352	1.20069	0.398912
3587.24		0.83178	0.610048	0.631841	1.2082	0.391867
3588.88		0.815236	0.592069	0.626003	1.20648	0.378144
3590.51		0.80212	0.59954	0.615599	1.17148	0.35942
3592.15		0.806505	0.576233	0.607697	1.13673	0.371778
3593.78		0.778138	0.569947	0.580335	1.11922	0.358296
3595.41		0.77803	0.561036	0.57613	1.10925	0.345615
3597.05		0.771893	0.5499	0.570948	1.07547	0.343375
3598.68		0.754524	0.540672	0.563266	1.08687	0.339936
3600.31		0.739756	0.534626	0.549714	1.05868	0.330777
3601.95		0.733739	0.520231	0.543555	1.05065	0.329099
3603.58		0.726185	0.512993	0.540333	1.0453	0.318702
3605.21		0.703379	0.51021	0.528848	1.00326	0.311065
3606.84		0.695234	0.498918	0.51432	0.976534	0.30239
3608.47		0.687563	0.489058	0.503924	0.989402	0.304154
3610.1		0.680248	0.4788	0.491789	0.970691	0.29888
3611.73		0.6604	0.468384	0.490962	0.924775	0.295927
3613.36		0.655923	0.468547	0.47785	0.887118	0.282694
3614.99		0.640095	0.452486	0.466478	0.930355	0.285142
3616.61		0.621313	0.450899	0.467175	0.899017	0.27611
3618.24		0.616483	0.44144	0.45537	0.878126	0.26072
3619.87		0.614845	0.430868	0.446066	0.872782	0.25937
3621.5		0.601503	0.41815	0.434588	0.839747	0.256141
3623.12		0.585324	0.414339	0.428329	0.820073	0.242992
3624.75		0.583688	0.409256	0.414026	0.800157	0.238884
3626.37		0.562307	0.396142	0.410704	0.778785	0.231538
3628		0.549203	0.390742	0.388792	0.756928	0.221191
3629.62		0.540475	0.388286	0.386885	0.751591	0.223686
3631.25		0.528318	0.376366	0.384326	0.732409	0.214461
3632.87		0.518526	0.365162	0.372201	0.719057	0.207357
3634.49		0.516065	0.358572	0.364751	0.695504	0.204614
3636.12		0.503319	0.348563	0.35578	0.672924	0.196271
3637.74		0.481469	0.33418	0.338873	0.637713	0.18733
3639.36		0.468368	0.327989	0.337731	0.654973	0.185989
3640.98		0.467565	0.32156	0.329415	0.626323	0.175088
3642.61		0.444652	0.314814	0.325012	0.612249	0.172349
3644.23		0.446569	0.300672	0.303651	0.589917	0.16461
3645.85		0.438437	0.292972	0.296967	0.567343	0.159752
3647.47		0.415171	0.282251	0.294958	0.537482	0.149655
3649.09		0.407039	0.283221	0.28284	0.522927	0.148518
3650.71		0.385548	0.26757	0.270831	0.522947	0.136983
3652.32		0.381556	0.261225	0.259148	0.492361	0.138288
3653.94		0.369997	0.24645	0.259208	0.458618	0.125913
3655.56		0.353	0.24122	0.247854	0.460586	0.11866
3657.18		0.339787	0.231774	0.229107	0.42393	0.115967
3658.79		0.329175	0.215252	0.22819	0.410595	0.112075
3660.41		0.316791	0.215192	0.211402	0.397261	0.0969835
3662.03		0.304289	0.201454	0.20255	0.390488	0.0963729
3663.64		0.29025	0.196863	0.188046	0.37497	0.0902032
3665.26		0.279641	0.186625	0.190285	0.34755	0.0838341
3666.87		0.270214	0.177661	0.175021	0.344909	0.0816258
3668.49		0.256768	0.169571	0.167586	0.313362	0.0765382
3670.1		0.246633	0.156473	0.153519	0.310723	0.0698514
3671.72		0.233543	0.151486	0.148477	0.297883	0.0616454
3673.33		0.225537	0.140456	0.144849	0.292088	0.06084
3674.94		0.214931	0.138891	0.139264	0.264675	0.0569955
3676.55		0.195339	0.132555	0.13031	0.235805	0.0495917
3678.17		0.193246	0.12272	0.121683	0.234386	0.0455086
3679.78		0.176138	0.114475	0.115448	0.221065	0.0401464
3681.39		0.169909	0.109731	0.105735	0.201672	0.0410248
3683		0.160724	0.100932	0.100154	0.187624	0.030384
3684.61		0.147519	0.0940416	0.0981616	0.185238	0.027864
3686.22		0.147912	0.0919238	0.091386	0.172164	0.0254247
3687.83		0.138256	0.0861481	0.0841763	0.166379	0.0258262
3689.44		0.13262	0.0847473	0.0804462	0.161567	0.0199484
3691.05		0.124265	0.0688724	0.0699763	0.149953	0.0187114
3692.65		0.1126	0.0739942	0.0732057	0.146358	0.0124751
3694.26		0.108739	0.0620971	0.0562139	0.117985	0.00995963
3695.87		0.105824	0.0622892	0.0566179	0.130424	0.00760491
3697.48		0.0964068	0.0585849	0.0497384	0.118815	0.0096509
3699.08		0.0972768	0.049473	0.0525357	0.120325	0.00725766
3700.69		0.0946001	0.0544388	0.045114	0.0970578	0.00346521
3702.29		0.0848298	0.0478731	0.0414982	0.0954117	0.00223348
3703.9		0.0801442	0.0469547	0.0481027	0.0903657	-0.00511747
3705.5		0.0764049	0.0457188	0.0410092	0.0777903	-0.00486767
3707.11		0.0697102	0.0421771	0.031742	0.0749327	-0.00201712
3708.71		0.0683367	0.0289332	0.0324778	0.0701328	-0.00904579
3710.32		0.0722843	0.0319937	0.0270172	0.0689778	-0.0053937
3711.92		0.0639358	0.032987	0.0256886	0.0534915	-0.0106609
3713.52		0.0610267	0.0306407	0.0289269	0.0686141	-0.0135672
3715.12		0.056581	0.0314761	0.0203155	0.0667334	-0.0146729
3716.73		0.0470516	0.0191895	0.01551	0.0524649	-0.0150978
3718.33		0.0552582	0.0185946	0.0174458	0.0372258	-0.0190419
3719.93		0.0524693	0.0201475	0.00992359	0.0504092	-0.0108252
3721.53		0.0360838	0.0170088	0.0154485	0.0310426	-0.0191278
3723.13		0.0426365	0.0119619	0.0122765	0.0308675	-0.0183497
3724.73		0.0383121	0.0128008	0.0153023	0.0357949	-0.0176907
3726.33		0.0374169	0.00807323	0.00930493	0.0399945	-0.019791
3727.93		0.0309652	0.0109812	0.00852685	0.0245187	-0.0228906
3729.53		0.0266423	0.00872023	0.00155243	0.0124448	-0.0258293
3731.12		0.029414	0.00534644	0.00284143	0.0232064	-0.0230873
3732.72		0.0253285	-0.00144659	-0.000326404	0.0172076	-0.0198246
3734.32		0.0194699	0.00281576	-0.00273252	0.0165541	-0.022641
3735.91		0.0201149	0.00509043	0.00323348	0.0122578	-0.0236568
3737.51		0.0167403	0.00521837	-0.00471594	0.0145214	-0.0252317
3739.11		0.0219974	-0.000617928	-0.00625022	0.00123921	-0.0269659
3740.7		0.0209886	-0.00120459	-0.00104318	0.00714864	-0.0237393
3742.3		0.0140684	-0.00489238	-0.00899055	0.00261357	-0.029072
3743.89		0.0215735	0.00247524	-0.00302108	0.0204282	-0.0296438
3745.49		0.0145361	-0.00542649	-0.00553107	-0.0098542	-0.029255
3747.08		0.0137657	-0.0021933	-0.00608341	0.0026182	-0.0274253
3748.67		0.0112223	-0.00556057	-0.0177245	-0.0121152	-0.0239549
3750.27		0.0108076	-0.00996116	-0.0132743	-0.0074141	-0.0270437
3751.86		-0.000957171	-0.00521509	-0.00762753	0.00360393	-0.0267317
3753.45		0.0021762	-0.00969403	-0.0100253	-0.00335303	-0.024939
3755.04		0.00566481	-0.00669645	-0.00753006	-0.012981	-0.0283055
3756.63		0.0091539	-0.00894733	-0.0142753	-0.0201787	-0.0320312
3758.23		0.00353933	-0.0108795	-0.014714	-0.00867073	-0.0294762
3759.82		0.00632003	-0.0117771	-0.0133039	-0.0129513	-0.0277604
3761.41		0.00425355	-0.00989062	-0.0139587	-0.0089717	-0.0297238
3763		-0.0023054	-0.00991226	-0.0214621	-0.0372992	-0.0331665
3764.58		0.00118618	-0.014228	-0.0164621	-0.0214145	-0.0298084
3766.17		-0.00466234	-0.00891983	-0.0187457	-0.0089296	-0.0332495
3767.76		-0.00708153	-0.0144273	-0.0205936	-0.0122334	-0.0292098
3769.35		-0.00347021	-0.0165144	-0.0217886	-0.0223379	-0.0274494
3770.94		-0.00801663	-0.0117612	-0.012437	-0.0249108	-0.0286882
3772.52		-0.00428606	-0.0146423	-0.0191752	-0.0155796	-0.0307262
3774.11		-0.00339265	-0.0192726	-0.0202594	-0.0198509	-0.0294834
3775.7		-0.00509994	-0.0135632	-0.0214516	-0.0241212	-0.0319199
3777.28		-0.0097626	-0.0143748	-0.0148152	-0.0211029	-0.0296756
3778.87		-0.00366532	-0.0141519	-0.0240512	-0.0367882	-0.0331905
3780.45		-0.00619873	-0.0141669	-0.020675	-0.0199214	-0.0314247
3782.04		-0.00861343	-0.0124317	-0.0190377	-0.0224871	-0.0330981
3783.62		0.00209655	-0.0174561	-0.0225095	-0.0320964	-0.0325307
3785.21		-0.0126137	-0.016674	-0.0205446	-0.0247003	-0.0354825
3786.79		-0.0112433	-0.0152551	-0.0179267	-0.029692	-0.0300735
3788.37		-0.000177095	-0.0170169	-0.0208528	-0.0273951	-0.0322238
3789.96		-0.00105222	-0.0201301	-0.0221474	-0.0275264	-0.0308533
3791.54		-0.015051	-0.0170393	-0.0206146	-0.00579402	-0.032362
3793.12		-0.0119051	-0.0172086	-0.019516	-0.0146683	-0.03419
3794.7		-0.00745812	-0.0192861	-0.0223306	-0.0201407	-0.0303771
3796.28		-0.0109324	-0.0212835	-0.0217742	-0.0324138	-0.0297635
3797.86		-0.00565681	-0.0171564	-0.0245874	-0.0337546	-0.0342292
3799.44		-0.0152784	-0.0170052	-0.0204419	-0.0333938	-0.030694
3801.02		-0.00621818	-0.0157401	-0.0201008	-0.0259874	-0.029398
3802.6		-0.00708928	-0.0217116	-0.0203026	-0.039228	-0.0303413
3804.18		-0.0157634	-0.0155142	-0.0150677	-0.0206452	-0.0288438
3805.76		-0.0110765	-0.0163151	-0.0187472	-0.015179	-0.0305455
3807.34		-0.0162026	-0.0187854	-0.022426	-0.0366758	-0.0289265
3808.91		-0.0091499	-0.01704	-0.0206681	-0.0370376	-0.0294666
3810.49		-0.00942733	-0.0211793	-0.0209751	-0.0366696	-0.030286
3812.07		-0.00603896	-0.0137065	-0.0248693	-0.0219684	-0.0277846
3813.64		-0.00938954	-0.0212645	-0.0252837	-0.043704	-0.0289225
3815.22		-0.00907429	-0.0149039	-0.0159126	-0.021956	-0.0303795
3816.79		-0.0156162	-0.016814	-0.0179564	-0.0339728	-0.0270758
3818.37		-0.0100976	-0.0225409	-0.0219564	-0.0148948	-0.0284912
3819.94		-0.00824378	-0.00814591	-0.0168233	-0.00893357	-0.0273459
3821.52		-0.0179766	-0.0192797	-0.0278887	-0.0347936	-0.0244799
3823.09		-0.01624	-0.0180857	-0.0228629	-0.0157125	-0.025133
3824.67		-0.0188776	-0.0172091	-0.0144661	-0.0335542	-0.0289053
3826.24		-0.0206871	-0.0174454	-0.0168318	-0.0207871	-0.0303569
3827.81		-0.00830779	-0.0156928	-0.0190881	-0.0323107	-0.0236477
3829.38		-0.0146092	-0.0153712	-0.0172124	-0.023914	-0.0290177
3830.96		-0.012279	-0.0170373	-0.020772	-0.0257189	-0.0262669
3832.53		-0.0121947	-0.0121812	-0.0168292	-0.0309236	-0.0286753
3834.1		-0.0102181	-0.0168682	-0.0183217	-0.0135358	-0.023643
3835.67		-0.00611284	-0.00930684	-0.0123118	-0.0206819	-0.0259299
3837.24		-0.0108747	-0.0160605	-0.0192389	-0.0217539	-0.0269359
3838.81		-0.0104337	-0.0173258	-0.0174677	-0.0235535	-0.0265412
3840.38		-0.0147216	-0.0180339	-0.015587	-0.0156355	-0.0223857
3841.95		-0.00647609	-0.015242	-0.0172935	-0.0218058	-0.0242695
3843.51		-0.010763	-0.0165056	-0.0147591	-0.0257886	-0.0237924
3845.08		-0.00913766	-0.0145078	-0.0164641	-0.028556	-0.0234346
3846.65		-0.00219118	-0.0136228	-0.0178423	-0.0135891	-0.0231159
3848.22		-0.0120337	-0.0109875	-0.012914	-0.0238848	-0.0248365
3849.78		-0.0113527	-0.0132031	-0.0165739	-0.0152319	-0.0212363
3851.35		-0.0114989	-0.0180425	-0.0111006	-0.01508	-0.0217553
3852.92		-0.0134181	-0.00872488	-0.0141067	-0.0248868	-0.0232335
3854.48		-0.00930678	-0.0191303	-0.0112413	-0.0303201	-0.023431
3856.05		-0.00578613	-0.00519863	-0.0145722	-0.0204484	-0.0204676
3857.61		-0.0104233	-0.0123421	-0.0170327	-0.0183491	-0.0223035
3859.18		-0.00382747	-0.0129634	-0.0117733	-0.01552	-0.0169385
3860.74		-0.00905479	-0.0100052	-0.0122754	-0.00345903	-0.0172129
3862.3		-0.0063598	-0.0151585	-0.0100588	-0.0220048	-0.0210463
3863.87		-0.0096943	-0.0108471	-0.00925479	-0.0031399	-0.019039
3865.43		-0.00877186	-0.00987534	-0.0152995	-0.000549705	-0.019311
3866.99		-0.00465654	-0.00739191	-0.0125372	-0.0181207	-0.0175421
3868.55		-0.0146107	-0.014213	-0.00683869	-0.0147995	-0.0181724
3870.11		-0.00434617	-0.0136371	-0.0134249	-0.00856249	-0.019362
3871.68		-0.00152993	-0.00812967	-0.0103343	-0.0324463	-0.0185507
3873.24		-0.00403381	-0.0053257	-0.0127877	-0.0215917	-0.0199787
3874.8		-0.0128037	-0.00705437	-0.0105655	-0.0151085	-0.0171259
3876.36		-0.00478354	-0.00655558	-0.00627683	-0.0287867	-0.0179922
3877.92		-0.0104783	-0.010828	-0.00698863	-0.0196294	-0.0159378
3879.47		-0.000210699	-0.00221591	-0.00922181	-0.0192163	-0.0158027
3881.03		-0.00188441	-0.00497607	-0.00514851	-0.0180733	-0.0172267
3882.59		-0.00343939	-0.00932625	-0.00890235	-0.00988466	-0.0152899
3884.15		0.000681435	-0.00961976	-0.00928518	-0.0165131	-0.0135523
3885.71		-0.00595667	-0.00879921	-0.00727545	-0.0148812	-0.012694
3887.26		-0.0099931	-0.00972774	-0.00602606	-0.0137341	-0.0119148
3888.82		0.000868704	-0.00636098	-0.0108642	0.000774533	-0.00973484
3890.38		0.00345446	-0.00633395	-0.00341645	-0.0221254	-0.0107141
3891.93		-0.00696519	-0.00638583	-0.00749222	-0.0166028	-0.0102126
3893.49		-0.0014225	-0.00357396	-0.00623998	-0.0127794	-0.0136302
3895.04		-0.00604762	0.000113313	-0.00531326	0.00440529	-0.0127671
3896.6		0.00753609	-0.00256126	-0.00395092	-0.017033	-0.0107032
3898.15		-0.00240859	-0.00666677	-0.0040012	-0.00300403	-0.0111185
3899.7		-0.00041101	-0.00615892	-0.0119874	-0.0144807	-0.011533
3901.26		-0.00586175	-0.00382122	-0.0076875	0.0116962	-0.0110667
3902.81		-0.0107208	-0.00617526	-0.00501772	-0.00585132	-0.00879963
3904.36		-0.00079991	-0.00216619	0.00200159	0.00478082	-0.00713173
3905.91		-0.000219127	-0.00539384	-0.00587302	-0.0130076	-0.00758304
3907.47		7.43964e-06	0.000604699	-0.003636	-0.0118473	-0.00523357
3909.02		-0.0044949	-0.00301938	-0.00509472	-0.0160301	-0.0107633
3910.57		-0.0014297	0.00194645	-0.00492199	0.0006789	-0.00669225
3912.12		-0.000492175	-0.001915	0.00155726	-0.00593107	-0.00518035
3913.67		0.0054117	-0.00156074	-0.00174762	-0.00112298	-0.00802772
3915.22		-0.000980418	-9.24211e-05	-0.00472561	-0.00821683	-0.00811425
3916.77		-0.00335203	-0.00267958	-0.00476747	-0.00219208	-0.00764001
3918.32		0.00042514	-0.00295972	0.000844836	-0.0146281	-0.00496493
3919.86		0.00491221	0.00312322	-0.0100676	-0.00544332	-0.00388907
3921.41		-0.00360615	0.00117414	0.00391753	-0.00184471	-0.00593244
3922.96		-0.000773401	-0.00443278	-0.00579757	-0.010634	-0.00277502
3924.51		-0.00054131	0.00403791	0.00166577	-0.00751915	-0.00557677
3926.05		0.00205598	-0.0018859	0.00412871	-0.0121767	-0.00109774
3927.6		-0.00161269	-0.00216238	-0.00112673	-0.00638773	-0.00433788
3929.14		-0.00303443	0.00161778	-0.00366352	-0.00132661	-0.00221728
3930.69		0.0061856	0.000785804	0.00347652	0.00762241	-0.00265581
3932.24		-0.00339339	0.000113459	-0.00188556	0.0012684	-0.0024136
3933.78		0.00275349	-0.000160602	0.00145068	-0.0123721	-0.00253056
3935.32		-0.00351389	0.00195186	0.00402657	0.00702538	0.000313265
3936.87		0.00535339	0.00112228	-0.000463629	0.00286068	-0.00200213
3938.41		-0.000203558	0.000770518	-6.07032e-05	-0.00154586	-0.00295669
3939.95		0.000151765	0.00614558	-0.00454948	-0.0108098	-0.00171047
3941.5		0.0047641	0.000864125	0.00150831	-0.00306833	-0.00330341
3943.04		0.000154499	-0.000917403	0.000826108	-0.00382815	-0.00413563
3944.58		-0.00138041	0.000642034	0.00286269	-0.0126031	-0.00272695
3946.12		0.000632204	0.000134231	-0.00107967	0.00801598	0.00156245
3947.66		-7.40791e-05	0.00813687	0.00324141	-0.00561541	0.000812691
3949.2		0.00430426	0.00134735	-0.001678	0.00723234	0.00310371
3950.74		-0.000775767	0.000920909	0.00579733	0.0091497	0.00335552
3952.28		0.00159358	0.00129041	0.00294503	-0.00326407	0.00196816
3953.82		0.00218988	0.00468268	0.00281141	-0.00304508	0.00186159
3955.36		0.00479671	0.00505341	0.00115646	0.0025192	0.00295585
3956.9		-0.000872467	-0.00197165	0.000589391	0.00201148	0.0029709
3958.44		0.00540065	0.00301307	0.00274101	0.00636311	0.00494673
3959.98		0.00505305	0.00815746	0.00728516	0.0109586	0.00320335
3961.51		0.00718893	0.00837155	0.00965565	0.0140977	0.0020608
3963.05		0.00294056	0.00556407	0.0102873	0.0109219	0.00731904
3964.59		0.00992512	0.00100753	0.00330934	0.00215999	0.00617811
3966.12		0.00615067	-0.000764849	0.00209415	0.0016582	0.00443792
3967.66		0.00426856	0.0030306	0.000662309	0.0130606	0.00473862
3969.19		0.00132278	0.00579271	0.00379734	0.0135326	0.00692005
3970.73		0.00369813	0.00919171	0.00214945	0.00768968	0.0108623
3972.26		0.00134454	0.00917147	0.00528592	0.0154512	0.00776537
3973.8		0.00123795	-0.000550914	0.00505281	0.0071812	0.00742927
3975.33		0.00136828	0.00404284	0.00634242	0.0159164	0.00633389
3976.86		0.00658332	0.00418353	0.00176196	0.00716254	0.00475941
3978.4		0.00399524	0.00408619	0.00207453	0.00885508	0.00774566
3979.93		0.00188063	0.0068526	0.0102157	0.000103196	0.00849275
3981.46		0.00626947	0.00508634	0.00628959	0.0020407	0.00816063
3982.99		0.00900354	0.00801305	-0.00176709	0.0110239	0.00762934
3984.52		0.0112652	0.00418022	0.00963776	0.00178922	0.0100188
3986.06		0.00324074	0.00225673	0.00745333	0.00688768	0.00432914
3987.59		-0.00383726	0.00478761	0.00407372	0.0100439	0.00920027
3989.12		0.00693883	0.0050127	0.00667439	0.00688512	0.00983218
3990.65		0.00671947	0.00929446	0.00601416	0.0190312	0.00758489
3992.17		0.00555476	0.01135	0.0112255	0.0129595	0.00685843
3993.7		0.000725226	0.00624833	0.00415228	-0.00452846	0.00741277
3995.23		0.00393621	0.00162445	0.00490754	0.0207383	0.0127279
3996.76		-0.0018382	0.00813555	0.00729433	0.0190421	0.00772385
3998.29		-0.00382858	0.0037515	0.00750741	0.00592964	0.00980059
3999.81		0.00115743	0.00930943	0.00358984	0.00787915	0.00995813
4001.34		0.00437043	0.00850551	0.00967523	0.00910098	0.0115165
4002.87		0.000962721	0.00324846	0.009673	0.0227126	0.0134357
4004.39		0.005832	0.00658135	0.00727963	0.00110199	0.0136356
4005.92		0.00810061	0.00442724	0.00108181	0.00524183	0.0113564
4007.44		0.00410322	0.004262	0.00292994	0.00938264	0.010278
4008.97		0.00211636	0.00696051	0.00706194	0.00162149	0.0164404
4010.49		0.00143053	0.00536492	0.00760682	-0.00176629	0.0116036
4012.02		0.00334646	0.00997341	0.00586937	0.00504973	0.0180877
4013.54		0.00112458	0.00599312	0.0115255	0.0157533	0.0122525
4015.06		0.00185913	0.00726251	0.00815866	-0.00463571	0.0132981
4016.59		0.0063777	0.0107594	0.00707561	-0.0012177	0.0109045
4018.11		0.00403912	0.00829204	0.00892874	0.0109465	0.0121918
4019.63		0.00737634	0.00407563	0.00556401	0.00100597	0.0148399
4021.15		0.000664014	0.00741526	0.00720108	0.0139008	0.0151287
4022.67		0.00601226	0.00574507	0.00438138	0.0156224	0.0182584
4024.19		0.0138439	0.00439361	0.0135216	0.0292481	0.0161089
4025.72		0.000748368	0.0103596	0.00711549	0.0161535	0.0157202
4027.24		0.00396986	0.00646439	0.00603743	0.0142344	0.0185723
4028.75		0.00754654	0.00821647	0.0106135	0.0120732	0.0189852
4030.27		0.00592134	0.00790135	0.0110589	0.0293465	0.0151589
4031.79		0.00453313	0.01045	0.0155277	0.0118835	0.0166134
4033.31		0.00350012	0.00727297	0.014235	0.010697	0.0177087
4034.83		0.00554176	0.0130041	0.0181616	0.0155846	0.0194849
4036.35		0.00640148	0.00648798	0.0173052	0.00322573	0.0197818
4037.86		0.00170469	0.00824377	0.0135142	0.00252816	0.0215997
4039.38		0.00741309	0.0134995	0.0126592	0.0261233	0.0140982
4040.9		0.00295374	0.00945072	0.00963054	0.009395	0.0167976
4042.41		0.00641667	0.0151053	0.0111688	0.0225467	0.0172578
4043.93		0.0071607	0.006445	0.00944627	0.0184521	0.0174788
4045.44		0.00849639	0.00979445	0.0123993	0.0286908	0.0207806
4046.96		0.00309313	0.00837264	0.0104607	0.0202256	0.0202033
4048.47		0.013534	0.00925787	0.0163507	0.0263367	0.0197467
4049.99		0.0030476	0.0102232	0.0146309	0.0127722	0.021211
4051.5		0.0130165	0.0104734	0.0121509	0.025687	0.0217961
4053.01		0.00264933	0.0147008	0.0142377	0.0276712	0.0205419
4054.53		0.00528864	0.0141569	0.0161079	0.0337863	0.0213687
4056.04		0.00721898	0.0131364	0.010912	0.0131811	0.0244761
4057.55		0.00938631	0.0115599	0.0109353	0.019541	0.0229844
4059.06		0.00635176	0.0118131	0.0190046	0.0144846	0.0227336
4060.57		0.00757422	0.0123851	0.0195729	0.0172027	0.0257235
4062.08		0.0046589	0.0113671	0.00600844	0.0206505	0.0259943
4063.59		0.00209878	0.012338	0.013645	0.0250709	0.0240258
4065.1		0.00379567	0.0104464	0.0131283	0.0248769	0.0254982
4066.61		-0.00231052	0.0130091	0.0180482	0.018368	0.0223314
4068.12		0.004235	0.00857372	0.0130754	0.0274068	0.0255254
4069.63		0.0108993	0.0108196	0.0169096	0.0226003	0.0242002
4071.14		0.00976048	0.0121912	0.0156347	0.0233819	0.0236758
4072.65		0.00519337	0.0116547	0.012621	0.0200349	0.0275123
4074.15		0.00854854	0.0150158	0.0137393	0.025191	0.0256296
4075.66		0.0116677	0.0123331	0.0131189	0.00872827	0.0265876
4077.17		0.0101762	0.0148206	0.0124991	0.0163156	0.0261465
4078.68		-0.000182464	0.00689019	0.00948825	0.00859993	0.0247862
4080.18		-0.000727108	0.0115262	0.0121315	0.0242054	0.0263867
4081.69		0.0103159	0.0115501	0.0196679	0.0242652	0.029228
4083.19		0.00551575	0.0141196	0.0129626	0.0284555	0.0230702
4084.7		0.00650971	0.0133494	0.0174563	0.0105413	0.0272731
4086.2		0.00880469	0.0140114	0.01945	0.00841757	0.0307969
4087.7		0.0140561	0.0153102	0.018183	0.0150401	0.0244415
4089.21		0.00500149	0.0090542	0.0258315	0.0233639	0.0278468
4090.71		0.00741624	0.0128197	0.0134765	0.00399605	0.029773
4092.21		0.00522032	0.00974622	0.0152557	0.0310267	0.0318201
4093.72		0.0029066	0.016376	0.0209494	0.0155474	0.0306279
4095.22		0.0055593	0.0117131	0.0185987	0.0386933	0.0311966
4096.72		0.00998607	0.0131747	0.0166836	0.0283174	0.0293261
[truncated: 2 more rows]

## Sheet: Fig. 1b
Incubation time	RNA conc.	error bar
Pre	601.482	31.3158
0	324.488	15.6073
15	269.658	18.933
30	206.771	30.2072
60	159.923	18.9634
90	136.887	9.748

## Sheet: Fig. 1c
Incubation time	Rnase conc	error bar
0	17.8906	0.890963
15	31.1766	5.77953
30	50.2705	5.51738
60	52.9061	3.28288
90	40.8563	2.36791

## Sheet: Fig. 1d
	Raman int.
Raman shift	RNA	Difference (a-b)	(a) 30 min	(b) Rnase A
176.08	0.0330348	0.0238292	0.185999	0.259472
178.57	0.0278776	0.0179448	0.172742	0.247675
181.06	0.026437	0.0213094	0.164731	0.229475
183.549	0.0235023	0.00836869	0.148288	0.223871
186.038	0.0212234	0.019185	0.143375	0.198704
188.526	0.0178877	0.0141772	0.134085	0.191853
191.013	0.0159365	0.0190085	0.122408	0.165439
193.5	0.0134022	0.008746	0.113909	0.168261
195.986	0.00908243	0.00797685	0.104852	0.154999
198.472	0.00709454	0.000410377	0.0936445	0.149175
200.957	0.00725639	0.00285827	0.0910246	0.141066
203.441	0.00490394	-0.0065363	0.0845851	0.145794
205.925	0.00204125	-0.0096102	0.0771891	0.138879
208.408	0.00118256	-0.00200364	0.0773463	0.12696
210.891	0.000578838	-0.0044897	0.0745588	0.126478
213.373	-0.000352919	-0.00950162	0.0642932	0.118072
215.854	-0.00128477	-0.0133509	0.0595131	0.116582
218.335	-0.0016337	-0.010354	0.051152	0.0984097
220.816	-0.00150904	-0.0104334	0.0497875	0.0963535
223.295	-0.00116584	-0.0169575	0.0441262	0.0977339
225.774	-0.00206162	-0.0126977	0.0403715	0.0849108
228.253	-0.00190079	-0.0195973	0.0382053	0.0924842
230.731	-0.00319756	-0.0112701	0.0382639	0.0792543
233.208	-0.000413389	-0.0125787	0.0359344	0.0776209
235.685	-0.00218403	-0.019961	0.0266041	0.0745041
238.161	-0.00118549	-0.00857503	0.0294399	0.0608238
240.637	-0.00182674	-0.0162784	0.0236842	0.0639402
243.111	-0.0026867	-0.0153663	0.020392	0.0572132
245.586	-0.00307306	-0.0173288	0.0153479	0.0522828
248.06	-0.00192911	-0.0188716	0.0145965	0.053549
250.533	0.000380755	-0.0124441	0.0146383	0.0433318
253.005	-0.000843931	-0.0179842	0.0117353	0.0475512
255.477	-0.00101201	-0.0161838	0.0112958	0.0439673
257.949	-5.0593e-05	-0.0150996	0.0127629	0.04458
260.42	0.000109103	-0.0116653	0.0133531	0.0400293
262.89	0.00314731	-0.0149032	0.0117938	0.0427153
265.359	0.00578461	-0.011973	0.0105507	0.0360379
267.829	0.00532461	-0.0104367	0.0133616	0.0380772
270.297	0.00752449	-0.0130765	0.0104442	0.0376331
272.765	0.00830322	-0.0102884	0.0163527	0.0426258
275.232	0.00937336	-0.012137	0.0115224	0.0378551
277.699	0.0104434	-0.0170838	0.00979185	0.0430011
280.165	0.00888989	-0.0107019	0.012513	0.0371437
282.63	0.0084294	-0.0166181	0.00560882	0.0355631
285.095	0.00698501	-0.0211239	0.00371308	0.0397392
287.56	0.00404659	-0.0209154	-0.00144545	0.0311519
290.023	0.00344012	-0.0203758	-0.00254993	0.0285214
292.487	0.000975233	-0.0197334	-0.00667859	0.0208876
294.949	0.000769417	-0.0153635	-0.0112069	0.00665052
297.411	-0.0010033	-0.0189644	-0.0139081	0.00809017
299.872	-0.000480519	-0.0246084	-0.0169293	0.0122866
302.333	-0.00279996	-0.0183381	-0.0113633	0.0111597
304.793	-0.00351622	-0.0143523	-0.0151839	-0.00133047
307.253	-0.00011507	-0.0122897	-0.0167796	-0.00718385
309.712	0.000698914	-0.011561	-0.0185363	-0.0111605
312.171	0.00122132	-0.00856861	-0.0209313	-0.0197804
314.628	0.0018894	-0.0088243	-0.0211015	-0.0196434
317.086	0.00324973	-0.0116887	-0.0231823	-0.0183898
319.542	0.00151277	-0.0129636	-0.0294007	-0.0262993
321.998	0.00116037	-0.0192811	-0.0267137	-0.0118921
324.454	-0.00225288	-0.0140232	-0.0257782	-0.018808
326.909	-0.00209529	-0.00779513	-0.0231746	-0.0246072
329.363	-0.00230215	-0.00363513	-0.0208911	-0.0276096
331.817	-0.00254553	-0.00654899	-0.0247335	-0.0290952
334.27	-0.00716151	-0.00772405	-0.029214	-0.0343839
336.723	-0.00667627	-0.00457988	-0.0267773	-0.0355158
339.175	-0.00866887	-0.0123591	-0.0330909	-0.0331709
341.626	-0.00814733	-0.00496638	-0.0346346	-0.0474692
344.077	-0.0129458	-0.00596459	-0.0360212	-0.0480906
346.527	-0.0107482	-0.00786883	-0.0414659	-0.0537552
348.977	-0.00884227	-0.00730118	-0.0421406	-0.055743
351.426	-0.00959633	-0.00186414	-0.0367728	-0.0558539
353.874	-0.00918445	0.00210593	-0.037849	-0.0639279
356.322	-0.00848113	-0.00349565	-0.0445738	-0.0657251
358.769	-0.00683049	0.00120339	-0.042075	-0.0692454
361.216	-0.00616374	0.00598654	-0.039419	-0.0726488
363.662	-0.0055335	0.00247756	-0.042332	-0.0716954
366.108	-0.0071989	0.00052517	-0.0438155	-0.070945
368.552	-0.00627728	-0.00131908	-0.0398927	-0.0617178
370.997	-0.00462697	-0.00147639	-0.0388349	-0.0597736
373.441	-0.0043978	0.00177476	-0.0341206	-0.0574326
375.884	-0.00300269	0.00322782	-0.0271813	-0.0486547
378.326	-0.00281008	0.00286188	-0.028038	-0.0494398
380.768	-0.00112359	0.00213863	-0.0259539	-0.044948
383.21	0.00278555	0.0034062	-0.0231559	-0.0424993
385.651	0.00352454	0.00191426	-0.0178943	-0.0316937
388.091	0.00470071	0.0144267	-0.0116802	-0.0417711
390.53	0.00955705	0.0128351	-0.00729718	-0.0322116
392.97	0.010478	0.014959	-0.00132541	-0.0260551
395.408	0.0117998	0.0199127	0.00384918	-0.0257017
397.846	0.0139231	0.0199524	0.0114078	-0.0136713
400.283	0.0168844	0.029901	0.0199986	-0.015844
402.72	0.021704	0.0269619	0.0239746	-0.00477964
405.156	0.0231713	0.0261245	0.0310505	0.00788165
407.592	0.0251486	0.0281217	0.0356592	0.0120599
410.027	0.0296401	0.0324982	0.0420952	0.0153552
412.461	0.0298683	0.0290772	0.0472568	0.0290874
414.895	0.0294041	0.0352532	0.0563137	0.0336967
417.328	0.0328752	0.037978	0.0605173	0.0360629
419.761	0.0344514	0.0411743	0.0585157	0.0277462
422.193	0.0346794	0.0486305	0.0650221	0.0262265
424.624	0.03713	0.0448943	0.0677091	0.0365038
427.055	0.038196	0.0473001	0.0641114	0.0268981
429.486	0.038023	0.0530177	0.0712486	0.0291694
431.915	0.0395625	0.0438604	0.065659	0.0348778
434.344	0.0382598	0.0463656	0.0664301	0.0321032
436.773	0.0362647	0.0511483	0.0659269	0.0236457
439.201	0.0336502	0.05204	0.0664558	0.0230652
441.628	0.0334769	0.0479302	0.0630064	0.0241218
444.055	0.0312631	0.0483381	0.0624978	0.0226555
446.481	0.0297051	0.0481548	0.0638961	0.0251862
448.907	0.0280377	0.0532215	0.0652927	0.019314
451.332	0.0267711	0.0479572	0.0626315	0.0234788
453.757	0.0241926	0.0494263	0.0636268	0.0227208
456.18	0.0243834	0.0436649	0.0579398	0.0228398
458.604	0.0217685	0.0485837	0.0615562	0.020756
461.026	0.0229794	0.0463966	0.0602399	0.0221492
463.449	0.0209474	0.0488363	0.0620235	0.0210996
465.87	0.0210287	0.0407583	0.0608627	0.032167
468.291	0.0200897	0.0447779	0.0609727	0.0259116
470.712	0.0194785	0.0506039	0.0633873	0.0204533
473.131	0.0195597	0.0395268	0.0587219	0.0307121
475.551	0.020406	0.0512377	0.0696428	0.0294481
477.969	0.0188838	0.0512057	0.0675189	0.0261012
480.387	0.0206045	0.0485906	0.0718353	0.0371914
482.805	0.0203211	0.0504697	0.071219	0.0331988
485.222	0.0206935	0.0483533	0.0715553	0.0371233
487.638	0.0228149	0.0409172	0.0675953	0.042685
490.054	0.0217662	0.040598	0.0709504	0.0485639
492.469	0.0227943	0.0467304	0.0782803	0.0504799
494.884	0.0262274	0.0548672	0.0865629	0.0507131
497.298	0.0322839	0.0517583	0.083948	0.0515035
499.711	0.0323281	0.0501757	0.0870577	0.0590111
502.124	0.0374371	0.0549361	0.0913585	0.0582759
504.536	0.0394853	0.0550134	0.102975	0.0767378
506.948	0.0357399	0.0442285	0.107352	0.100997
509.359	0.0340349	0.0489257	0.122384	0.117533
511.769	0.0329858	0.0378753	0.125167	0.139667
514.179	0.0302969	0.0393477	0.127471	0.140998
516.589	0.0321992	0.0349717	0.121025	0.137686
518.997	0.0322431	0.0297424	0.108374	0.125811
521.406	0.0323963	0.03309	0.0979484	0.103774
523.813	0.0339705	0.0337318	0.0944401	0.0971332
526.22	0.0341964	0.0253228	0.0834542	0.0930102
528.627	0.0346774	0.0338796	0.0859073	0.0832444
531.033	0.0384378	0.0250132	0.0787356	0.0859559
533.438	0.0370604	0.0323314	0.0809468	0.0777846
535.843	0.0378328	0.0300929	0.0834745	0.0854106
538.247	0.0379128	0.0336027	0.0828989	0.0788739
540.65	0.0387215	0.0287536	0.0812876	0.0840544
543.053	0.0379999	0.0328751	0.0795953	0.0747522
545.456	0.0396466	0.0329441	0.0791737	0.0739674
547.858	0.0411111	0.0333137	0.076126	0.0684997
550.259	0.040025	0.0316719	0.0733153	0.0666294
552.66	0.0417081	0.0371131	0.0767858	0.0634764
555.06	0.0445571	0.0296512	0.0723017	0.0682407
557.459	0.0432887	0.0333658	0.0726673	0.0628823
559.858	0.0432955	0.0327808	0.0712816	0.0616012
562.256	0.043776	0.0400524	0.0713258	0.0500375
564.654	0.0402483	0.042796	0.0752654	0.0519511
567.051	0.0406559	0.0361938	0.0691825	0.052782
569.448	0.0433954	0.0494852	0.0735166	0.0384502
571.844	0.0430742	0.0496156	0.076338	0.0427558
574.24	0.0472712	0.0564526	0.0805893	0.0386187
576.634	0.0477879	0.0664298	0.0890541	0.036199
579.029	0.0507096	0.0713967	0.0916321	0.0323766
581.422	0.0490036	0.076002	0.0961968	0.0323116
583.816	0.04584	0.0602238	0.0852513	0.040044
586.208	0.0404901	0.0659194	0.081303	0.0246137
588.6	0.0410432	0.0555957	0.0713087	0.0251408
590.992	0.0384261	0.0505887	0.0695046	0.0302653
593.382	0.0375216	0.0460145	0.0630065	0.0271872
595.773	0.0426293	0.0532181	0.0662096	0.0207865
598.162	0.0432551	0.0454002	0.0628896	0.0279831
600.552	0.0432614	0.0421139	0.0609997	0.0302172
602.94	0.0389681	0.0408824	0.0583128	0.0278887
605.328	0.0348569	0.0332645	0.055863	0.0361576
607.715	0.0289602	0.0383795	0.0605694	0.0355039
610.102	0.0302418	0.0372295	0.0601843	0.0367276
612.488	0.0280982	0.0362707	0.0587637	0.0359888
614.874	0.0266469	0.0361515	0.0650561	0.0462474
617.259	0.0277097	0.0333278	0.0712674	0.0607034
619.644	0.0327443	0.0389642	0.0842373	0.0724369
622.028	0.0342079	0.0426275	0.0875824	0.0719278
624.411	0.036291	0.0462292	0.0801893	0.0543362
626.794	0.0420907	0.0486501	0.0797139	0.049702
629.176	0.0457041	0.0525835	0.0855994	0.0528253
631.558	0.0439611	0.0506115	0.0848028	0.0547061
633.939	0.0429469	0.0543397	0.0949799	0.0650243
636.319	0.0436452	0.0424973	0.0942598	0.08282
638.699	0.0374931	0.0400467	0.11358	0.117653
641.078	0.0401226	0.0323038	0.128206	0.153444
643.457	0.0393998	0.0411911	0.140286	0.158552
645.835	0.0414098	0.046178	0.129539	0.133378
648.213	0.0363144	0.0385594	0.12396	0.136641
650.59	0.0354822	0.0344534	0.124742	0.144462
652.966	0.0331925	0.0388984	0.132998	0.15056
655.342	0.034255	0.0436652	0.134175	0.144816
657.718	0.0334956	0.0517386	0.136782	0.136069
660.092	0.0403517	0.0637507	0.139625	0.121399
662.466	0.0486654	0.0733487	0.144854	0.114408
664.84	0.0597482	0.0910155	0.159624	0.109774
667.213	0.0688999	0.103699	0.172484	0.110057
669.585	0.0697073	0.110518	0.174129	0.101778
671.957	0.0659599	0.099122	0.160582	0.0983364
674.329	0.0515726	0.0922363	0.152919	0.0970924
676.699	0.0445094	0.0854603	0.142789	0.091726
679.069	0.0374097	0.0769319	0.133055	0.0897971
681.439	0.0385814	0.0736755	0.128092	0.0870658
683.808	0.0356356	0.0766863	0.128694	0.0832121
686.176	0.0379732	0.0775948	0.129692	0.083356
688.544	0.0341529	0.0735636	0.124724	0.0818574
690.912	0.0336484	0.0710571	0.121505	0.0807165
693.278	0.0361317	0.0629511	0.115659	0.0843331
695.644	0.0335138	0.0612498	0.109892	0.0778274
698.01	0.0353413	0.0516507	0.1046	0.0847192
700.375	0.0346181	0.0532735	0.104079	0.0812887
702.739	0.0377573	0.0495487	0.103159	0.0857757
705.103	0.0415888	0.0543569	0.10852	0.0866604
707.466	0.0434891	0.0590996	0.112289	0.0851027
709.829	0.0499806	0.0576878	0.115977	0.0932627
712.191	0.0510792	0.0599775	0.124515	0.10326
714.553	0.0539633	0.0699403	0.130825	0.0974155
716.914	0.0619123	0.0746629	0.146518	0.114968
719.274	0.0708086	0.0761296	0.157279	0.129839
721.634	0.076717	0.0839673	0.165334	0.130187
723.993	0.0822246	0.0794052	0.160663	0.130013
726.352	0.0824123	0.0845206	0.154718	0.112316
728.71	0.0745472	0.0735902	0.138751	0.104257
731.068	0.0638034	0.0586192	0.121192	0.100116
733.425	0.0506548	0.050072	0.11063	0.0968927
735.781	0.0399111	0.0395607	0.103327	0.102027
738.137	0.0359084	0.033745	0.0950692	0.0981188
740.492	0.0317235	0.0405952	0.10025	0.0954483
742.847	0.0309273	0.0338946	0.0970793	0.101096
745.201	0.0298396	0.0326118	0.0968496	0.10278
747.554	0.0337438	0.0384601	0.100675	0.0995431
749.907	0.0369194	0.0275534	0.095193	0.108223
752.26	0.0387831	0.033336	0.0982995	0.103942
754.612	0.041412	0.0312011	0.098462	0.107617
756.963	0.0416725	0.0357225	0.101804	0.105731
759.314	0.0414957	0.0429215	0.103873	0.0975221
761.664	0.0445255	0.0398641	0.103634	0.102031
764.013	0.047373	0.0370521	0.104188	0.107418
766.362	0.0509493	0.0396656	0.102992	0.101322
768.711	0.0558738	0.0459912	0.109906	0.102264
771.059	0.0605068	0.0548373	0.11674	0.0990443
773.406	0.0771643	0.0744674	0.137331	0.100582
775.753	0.100599	0.0856078	0.151956	0.106157
778.099	0.140504	0.121327	0.185508	0.102691
780.444	0.187696	0.128326	0.19854	0.112342
782.789	0.215395	0.122861	0.195505	0.11623
785.134	0.208258	0.108025	0.181573	0.117677
787.478	0.184032	0.0920085	0.173684	0.130681
789.821	0.153066	0.0772097	0.156012	0.126083
792.164	0.126071	0.0593605	0.152813	0.149523
794.506	0.110809	0.0584508	0.158202	0.159601
796.847	0.106332	0.0487286	0.158101	0.174997
799.188	0.108888	0.048693	0.168737	0.19207
801.529	0.113631	0.0465174	0.175156	0.205821
803.869	0.126717	0.0576682	0.187299	0.20741
806.208	0.141298	0.0625661	0.202464	0.223837
808.547	0.158138	0.066457	0.20697	0.224821
810.885	0.165758	0.0729112	0.213464	0.224884
813.223	0.166055	0.0751392	0.214229	0.222544
815.56	0.154109	0.0687615	0.210063	0.226082
817.896	0.137463	0.0550501	0.203111	0.236898
820.232	0.122893	0.04684	0.20276	0.249472
822.567	0.108833	0.0220138	0.203441	0.290284
824.902	0.0973974	0.0170766	0.215335	0.317213
827.236	0.0897874	0.0104522	0.23184	0.35422
829.57	0.0793717	0.0038932	0.238959	0.376106
831.903	0.0763893	-0.00829362	0.237249	0.392869
834.236	0.0713664	-0.0101482	0.23347	0.38979
836.567	0.0685662	-0.00319095	0.227702	0.369428
838.899	0.0695556	-0.00325648	0.222409	0.361065
841.23	0.0690145	-0.00609939	0.218388	0.35918
843.56	0.0754331	-0.00167156	0.225261	0.363092
845.89	0.0778436	-0.00447326	0.232928	0.379843
848.219	0.0789423	-0.00474371	0.243776	0.397631
850.547	0.0798953	-0.00716393	0.253747	0.417457
852.875	0.079245	0.00587295	0.262524	0.410641
855.203	0.0755703	-0.00152995	0.253485	0.408023
857.529	0.0761954	0.0112896	0.245717	0.375083
859.856	0.0733224	0.0100847	0.223473	0.341421
862.181	0.0726722	0.0192828	0.210056	0.305237
864.507	0.0692527	0.0250935	0.202125	0.283251
866.831	0.0679466	0.0389567	0.206521	0.268103
869.155	0.065766	0.0335404	0.198111	0.263312
871.479	0.0622008	0.0376501	0.2099	0.2756
873.802	0.0638098	0.0341055	0.208009	0.278245
876.124	0.0606454	0.0299161	0.215422	0.296809
878.446	0.0622179	0.0308832	0.22514	0.31081
880.767	0.061167	0.0224199	0.227301	0.32781
883.087	0.0599339	0.0168715	0.235426	0.349687
885.407	0.055312	0.0186456	0.245697	0.363282
887.727	0.0557915	0.0109669	0.246264	0.376476
890.046	0.054267	0.0154144	0.253431	0.380827
892.364	0.0511027	0.0253003	0.26171	0.378256
894.682	0.0485579	0.0165391	0.255116	0.381724
896.999	0.0450657	0.0186015	0.256395	0.380469
899.316	0.0461647	0.0334644	0.267772	0.374892
901.632	0.0435471	0.0178099	0.263481	0.393073
903.948	0.0445004	0.0281175	0.254575	0.362333
906.263	0.044397	0.0310198	0.250838	0.35171
908.577	0.047318	0.0402526	0.241931	0.322685
910.891	0.0508949	0.0443986	0.235885	0.306379
913.204	0.0530143	0.032991	0.225385	0.30783
915.517	0.0528017	0.0326515	0.227926	0.312439
917.829	0.049674	0.0290897	0.228319	0.318767
920.141	0.0455626	0.0275554	0.228313	0.321212
922.452	0.0387548	0.0224096	0.229419	0.331216
924.762	0.0344977	0.00892202	0.223208	0.342857
927.072	0.0294389	0.00403198	0.218268	0.342777
929.381	0.0270402	-0.00376407	0.221995	0.361215
931.69	0.0243499	0.00542726	0.232959	0.36405
933.998	0.0251942	0.00691089	0.236763	0.367764
936.306	0.0235971	0.00328258	0.23158	0.365276
938.613	0.0257896	-0.000703961	0.234587	0.376466
940.92	0.0251035	-0.00102175	0.222562	0.357734
943.226	0.0213567	0.00635141	0.223101	0.3468
945.531	0.0262457	-0.00458813	0.219027	0.357784
947.836	0.0254868	-0.00346481	0.219564	0.356846
950.14	0.0277523	-0.00239576	0.219146	0.354467
952.444	0.0265926	-0.000527148	0.221351	0.355005
954.747	0.0286031	0.0111314	0.22952	0.349422
957.05	0.0308322	-0.00164199	0.226156	0.364476
959.352	0.0338266	0.000400148	0.225256	0.359769
961.653	0.0357278	0.00294736	0.234535	0.37054
963.954	0.0411635	0.00789373	0.236337	0.365509
966.254	0.0464171	0.0116825	0.24283	0.369836
968.554	0.050614	0.00877059	0.240972	0.371521
970.853	0.056815	0.00616753	0.241021	0.375765
973.152	0.0632347	-1.18017e-08	0.246079	0.393726
975.45	0.065792	-0.017341	0.255988	0.437326
977.748	0.0680942	-0.0329763	0.258976	0.467124
980.045	0.0751698	-0.0284183	0.275007	0.48548
982.341	0.0752859	-0.0343924	0.280379	0.503634
984.637	0.0786084	-0.027415	0.290601	0.508826
986.932	0.0802185	-0.0292094	0.283326	0.500057
989.227	0.0830674	-0.0189001	0.294103	0.500805
991.521	0.082054	-0.0127337	0.290961	0.485912
993.815	0.0794738	-0.0144516	0.289409	0.486177
996.108	0.0778045	-0.0233593	0.307341	0.52912
998.401	0.0746413	-0.0272174	0.352471	0.607501
1000.69	0.0667413	-0.0126279	0.398873	0.658401
1002.98	0.0620478	0.0250963	0.392783	0.588299
1005.27	0.0573179	0.0270343	0.324181	0.475434
1007.56	0.0510212	0.0210407	0.278721	0.412289
1009.85	0.0475302	0.0311333	0.272946	0.386901
1012.14	0.0461527	0.0219302	0.256275	0.374951
1014.43	0.0449574	0.032925	0.250975	0.34888
1016.72	0.046495	0.0367564	0.245436	0.333887
1019.01	0.0446803	0.0399474	0.23743	0.315972
1021.29	0.0457442	0.036131	0.233241	0.315375
1023.58	0.0465896	0.0241652	0.238276	0.342577
1025.87	0.0468155	0.0127043	0.242515	0.367697
1028.15	0.0471508	0.00831929	0.254229	0.393455
1030.44	0.0507655	0.0139767	0.270634	0.410651
1032.72	0.0503721	0.028253	0.271132	0.388606
1035	0.0500516	0.0338891	0.268288	0.375039
1037.29	0.0559985	0.0309369	0.26433	0.37343
1039.57	0.0628199	0.031792	0.270154	0.381379
1041.85	0.0659247	0.03286	0.267864	0.376006
1044.13	0.0678999	0.0298666	0.266687	0.378912
1046.41	0.0659763	0.0302838	0.270519	0.384376
1048.69	0.0640163	0.0303145	0.274589	0.390839
1050.97	0.0632224	0.0337935	0.276431	0.388219
1053.25	0.0624285	0.0336081	0.283282	0.399478
1055.53	0.0642946	0.029687	0.286872	0.411496
1057.81	0.0617154	0.0254488	0.284018	0.413711
1060.09	0.0637273	0.0301021	0.29198	0.419005
1062.36	0.0654842	0.0338862	0.293022	0.414617
1064.64	0.0654557	0.0309251	0.293267	0.419747
1066.92	0.0678686	0.03875	0.295898	0.411436
1069.19	0.0671478	0.0418701	0.300197	0.413323
1071.47	0.0721114	0.0416246	0.30378	0.419448
1073.74	0.0764921	0.0466942	0.311577	0.423812
1076.01	0.0770832	0.0521434	0.320327	0.429094
1078.29	0.0831401	0.0561159	0.325975	0.431774
1080.56	0.0860633	0.0582962	0.326929	0.429813
1082.83	0.0902619	0.0747612	0.337267	0.42001
1085.1	0.0981044	0.0696199	0.332573	0.420725
1087.37	0.101356	0.0839296	0.335354	0.402279
1089.64	0.111057	0.0799068	0.330101	0.400311
1091.91	0.116567	0.0938074	0.33447	0.385061
1094.18	0.124665	0.0937648	0.338521	0.39161
1096.45	0.126859	0.0884836	0.331356	0.388597
1098.72	0.133864	0.0836565	0.338745	0.408142
1100.99	0.131358	0.0633234	0.330227	0.427046
1103.25	0.124626	0.049562	0.327354	0.444468
1105.52	0.111809	0.0363736	0.311279	0.439848
1107.78	0.0953475	0.0329937	0.298861	0.425387
1110.05	0.0822022	0.0268216	0.281749	0.407885
1112.31	0.0735024	0.0236746	0.276487	0.4045
1114.58	0.0689201	0.0139803	0.257227	0.389194
1116.84	0.062771	0.0215196	0.253474	0.371127
1119.1	0.0606666	0.0206103	0.255446	0.375737
1121.37	0.0595824	0.0122153	0.254157	0.387107
1123.63	0.0621786	0.0127809	0.257002	0.390754
1125.89	0.0620055	0.0140565	0.255632	0.38652
1128.15	0.0632899	0.0205508	0.251954	0.370245
1130.41	0.0646838	0.00748333	0.238413	0.369488
1132.67	0.068519	0.00945862	0.227814	0.349369
1134.93	0.0657954	0.00749693	0.220952	0.341529
1137.19	0.067991	-0.00046654	0.211863	0.339727
1139.45	0.0661421	0.00390318	0.20818	0.326843
1141.7	0.0648397	0.00816834	0.205292	0.315398
1143.96	0.0628816	0.00162513	0.198745	0.315392
1146.22	0.0615429	0.00315823	0.197923	0.311624
1148.47	0.0603136	0.020138	0.203622	0.293574
1150.73	0.0614163	0.0128039	0.198106	0.296483
1152.98	0.0578915	0.0265326	0.210801	0.29483
1155.24	0.0564802	0.0314892	0.207749	0.282016
1157.49	0.0554332	0.0318967	0.200322	0.26948
1159.74	0.0523458	0.0342749	0.191939	0.252262
1162	0.0464163	0.0303958	0.186498	0.249763
1164.25	0.0468635	0.0267921	0.192031	0.264383
1166.5	0.0464727	0.0363761	0.203052	0.266681
1168.75	0.0479038	0.0348192	0.215105	0.288458
1171	0.0514483	0.0411647	0.23861	0.315913
1173.25	0.0550658	0.0495445	0.249548	0.320006
1175.5	0.0604323	0.0517047	0.256191	0.327178
1177.75	0.0658354	0.0587878	0.262356	0.325709
1180	0.0619832	0.0604199	0.261918	0.322398
1182.24	0.0630138	0.0544515	0.252255	0.316485
1184.49	0.0608744	0.0484296	0.237261	0.302131
1186.74	0.0560751	0.0437719	0.232607	0.302135
1188.98	0.0530248	0.0378017	0.234313	0.314418
1191.23	0.0512499	0.037943	0.235781	0.31654
1193.47	0.0494022	0.035361	0.241224	0.32938
1195.72	0.0511254	0.0381015	0.247938	0.335739
1197.96	0.0490956	0.0478021	0.262287	0.343176
1200.2	0.0555559	0.0512653	0.282997	0.370771
1202.45	0.0559311	0.0469133	0.299492	0.404126
1204.69	0.0641769	0.0530067	0.330381	0.443798
1206.93	0.0672851	0.0515939	0.345362	0.47003
1209.17	0.0689358	0.072068	0.35748	0.456659
1211.41	0.0746311	0.0735139	0.351544	0.444848
1213.65	0.0810189	0.0760712	0.344493	0.429475
1215.89	0.088682	0.0743975	0.33426	0.41578
1218.13	0.0936123	0.0860618	0.340489	0.407084
1220.37	0.10634	0.086915	0.345207	0.413267
1222.6	0.123915	0.0948815	0.365512	0.433008
1224.84	0.138064	0.0941551	0.383748	0.463348
1227.08	0.154582	0.0934714	0.4058	0.499726
1229.31	0.168403	0.0942865	0.434851	0.544903
1231.55	0.181642	0.102226	0.468275	0.585679
1233.78	0.186427	0.0966225	0.487781	0.625853
1236.02	0.19041	0.0952821	0.499173	0.646226
1238.25	0.185977	0.084713	0.493386	0.653877
1240.48	0.184057	0.0861325	0.488712	0.644127
1242.72	0.180425	0.0818652	0.474175	0.627695
1244.95	0.181312	0.0846329	0.467272	0.612222
1247.18	0.182125	0.0805102	0.458778	0.605228
1249.41	0.179842	0.0749056	0.450601	0.601112
1251.64	0.175919	0.0776015	0.453399	0.601275
1253.87	0.167514	0.07507	0.456593	0.610437
1256.1	0.162497	0.076455	0.457878	0.610277
1258.33	0.150157	0.0728056	0.460753	0.620716
1260.56	0.14321	0.0649414	0.458537	0.629754
1262.78	0.134149	0.0601755	0.453219	0.62887
1265.01	0.122866	0.0569077	0.446548	0.623424
1267.24	0.112749	0.038679	0.42564	0.619138
1269.46	0.10817	0.0374776	0.417059	0.60733
1271.69	0.104175	0.0325514	0.408477	0.601481
1273.91	0.104115	0.0355247	0.402518	0.58719
1276.14	0.10635	0.0122394	0.394651	0.611858
1278.36	0.112266	0.0229473	0.399825	0.603005
1280.59	0.114975	0.017473	0.395217	0.60439
1282.81	0.122895	0.0140688	0.393152	0.606534
1285.03	0.125277	0.0218908	0.396814	0.599877
1287.25	0.134254	0.0242593	0.396021	0.594818
1289.47	0.149024	0.0565706	0.410019	0.565518
1291.69	0.154139	0.0561523	0.412088	0.569497
1293.91	0.159436	0.0603725	0.416144	0.569234
1296.13	0.168194	0.0701616	0.416143	0.55357
1298.35	0.167552	0.0757164	0.430457	0.567585
1300.57	0.170881	0.0865363	0.437135	0.560959
1302.79	0.167251	0.0912362	0.442143	0.561451
1305.01	0.168686	0.105859	0.459397	0.565662
1307.22	0.166477	0.112506	0.470925	0.573471
1309.44	0.167839	0.121464	0.483088	0.5786
1311.65	0.172699	0.140785	0.495489	0.567527
1313.87	0.173296	0.151629	0.510037	0.573452
1316.08	0.176917	0.171121	0.524982	0.566177
1318.3	0.174344	0.191871	0.545334	0.56554
1320.51	0.174322	0.21039	0.561629	0.561982
1322.72	0.170947	0.224557	0.563846	0.542863
1324.94	0.165896	0.225189	0.561928	0.538782
1327.15	0.166166	0.234937	0.558974	0.51846
1329.36	0.163192	0.228835	0.553396	0.519297
1331.57	0.169073	0.231465	0.549248	0.508453
1333.78	0.178307	0.230422	0.548202	0.508447
1335.99	0.186155	0.223603	0.550654	0.52328
1338.2	0.185441	0.216975	0.534495	0.508032
1340.41	0.177913	0.205904	0.526368	0.512743
1342.62	0.163972	0.198479	0.502811	0.486932
1344.82	0.140594	0.180884	0.474084	0.46912
1347.03	0.127601	0.173416	0.449334	0.441468
1349.24	0.117778	0.168323	0.430706	0.419813
1351.44	0.114769	0.173705	0.420428	0.394758
1353.65	0.118136	0.173197	0.405935	0.372381
1355.85	0.11939	0.171401	0.396928	0.360843
1358.06	0.122648	0.178167	0.392057	0.342224
1360.26	0.127182	0.18815	0.392752	0.327364
1362.46	0.130477	0.193995	0.387084	0.308942
1364.67	0.134027	0.187921	0.376246	0.301319
1366.87	0.131856	0.179849	0.364134	0.294856
1369.07	0.136354	0.172657	0.354726	0.29131
1371.27	0.139868	0.17952	0.355497	0.281564
1373.47	0.140612	0.174117	0.354678	0.288897
1375.67	0.14347	0.167577	0.349244	0.290668
1377.87	0.140098	0.161875	0.343174	0.290078
1380.07	0.137454	0.162991	0.340046	0.283287
1382.27	0.137543	0.147762	0.336996	0.302775
1384.46	0.13264	0.140776	0.334264	0.309581
1386.66	0.132146	0.141653	0.33527	0.309787
1388.86	0.126514	0.131862	0.335082	0.325151
1391.05	0.125401	0.123027	0.330598	0.332114
1393.25	0.122867	0.118726	0.324524	0.329276
1395.44	0.119422	0.118757	0.329105	0.336557
1397.64	0.114811	0.0999542	0.323427	0.357557
1399.83	0.112132	0.0934413	0.321963	0.365635
1402.03	0.107484	0.0968598	0.32368	0.362913
1404.22	0.0993392	0.100923	0.330566	0.367429
1406.41	0.0949836	0.0966	0.336815	0.384344
1408.6	0.0936524	0.0965196	0.334156	0.380218
1410.79	0.0897707	0.100374	0.340881	0.384811
1412.98	0.0877838	0.093583	0.33496	0.386203
1415.17	0.0859792	0.104131	0.339377	0.376393
1417.36	0.0850857	0.0950762	0.336715	0.386623
1419.55	0.0832812	0.0914829	0.33294	0.386331
1421.74	0.0815497	0.0880125	0.328686	0.385078
1423.93	0.0762474	0.0763264	0.323717	0.395824
1426.12	0.0737509	0.07231	0.311191	0.382209
1428.3	0.0672098	0.0649994	0.30447	0.383153
1430.49	0.0644219	0.0453168	0.294727	0.399056
1432.68	0.0615248	0.0498263	0.316	0.425878
1434.86	0.0604497	0.039822	0.326934	0.459379
1437.05	0.0599941	0.0204771	0.348126	0.524238
1439.23	0.0623807	0.00600953	0.37067	0.583457
1441.41	0.064731	0.00492034	0.412142	0.651554
1443.6	0.0689396	0.00387505	0.437706	0.69413
1445.78	0.0723832	0.013226	0.459692	0.714345
1447.96	0.0764827	0.0128716	0.461396	0.71764
1450.14	0.0818576	0.0258847	0.467793	0.707053
1452.32	0.0878885	0.0328938	0.458759	0.681385
1454.5	0.0955956	0.0416087	0.456406	0.663676
1456.68	0.101918	0.0543661	0.45787	0.645605
1458.86	0.109407	0.0488353	0.445494	0.634654
1461.04	0.117697	0.0597302	0.442344	0.612182
1463.22	0.121542	0.0603235	0.436091	0.601229
1465.4	0.125132	0.0592762	0.428248	0.590354
1467.57	0.130617	0.0653333	0.422233	0.571039
1469.75	0.143244	0.0876011	0.432203	0.551363
1471.93	0.163559	0.128252	0.45108	0.516525
1474.1	0.186753	0.168737	0.467491	0.478007
1476.28	0.218656	0.207713	0.485492	0.444447
1478.45	0.244474	0.243446	0.4887	0.392407
1480.63	0.266538	0.266441	0.473695	0.331605
1482.8	0.27585	0.263035	0.447236	0.294723
1484.97	0.272044	0.262775	0.422925	0.256239
1487.14	0.253699	0.249082	0.385729	0.218634
1489.32	0.221654	0.218423	0.339466	0.193669
1491.49	0.183778	0.177454	0.293043	0.184942
1493.66	0.155596	0.146793	0.256402	0.175374
1495.83	0.127268	0.128064	0.231293	0.165166
1498	0.107939	0.107944	0.208966	0.161636
1500.17	0.0931662	0.0991128	0.195229	0.153785
1502.33	0.0895794	0.0856279	0.178787	0.149054
1504.5	0.0830777	0.0778936	0.172444	0.151281
1506.67	0.0862686	0.0859014	0.172544	0.138628
1508.84	0.0854149	0.0817459	0.171529	0.143653
1511	0.0835047	0.081143	0.169241	0.140957
1513.17	0.0784608	0.0795584	0.166396	0.138941
1515.33	0.0738908	0.0769079	0.164585	0.140283
1517.5	0.0655677	0.0746851	0.160626	0.137505
1519.66	0.0668643	0.065824	0.155552	0.143565
1521.83	0.0616022	0.0675849	0.15525	0.140265
1523.99	0.0624618	0.0766557	0.163458	0.138883
1526.15	0.0635036	0.0735374	0.162201	0.141861
1528.31	0.0627965	0.0713216	0.160545	0.142758
1530.48	0.0624174	0.0758937	0.163502	0.140173
1532.64	0.05967	0.0812835	0.169401	0.140988
1534.8	0.0598741	0.0753706	0.165597	0.144362
1536.96	0.0581106	0.0751078	0.161792	0.138695
1539.12	0.0551448	0.0783369	0.166179	0.140547
1541.27	0.054584	0.073324	0.164123	0.145278
1543.43	0.0509625	0.0701614	0.161192	0.145648
1545.59	0.0501104	0.0793994	0.16836	0.142337
1547.75	0.0495498	0.0766181	0.169484	0.148585
1549.9	0.0483699	0.07549	0.165836	0.144553
1552.06	0.0505424	0.0688775	0.164652	0.153239
1554.22	0.0564316	0.087278	0.179931	0.148245
1556.37	0.0650538	0.0852905	0.180496	0.152329
1558.53	0.0711983	0.100786	0.19657	0.153253
1560.68	0.0830271	0.114512	0.212722	0.157136
1562.83	0.0987185	0.126712	0.224022	0.155697
1564.99	0.115139	0.145255	0.242242	0.155178
1567.14	0.140778	0.170341	0.265153	0.151698
1569.29	0.163065	0.201637	0.297448	0.153297
1571.44	0.1867	0.232092	0.330777	0.157896
1573.59	0.204323	0.258678	0.357186	0.157613
1575.74	0.207298	0.281658	0.381288	0.159409
1577.89	0.204917	0.299963	0.402766	0.164485
1580.04	0.181001	0.303568	0.411518	0.17272
1582.19	0.158506	0.275975	0.395296	0.190914
1584.34	0.135793	0.262061	0.387903	0.201346
1586.49	0.113007	0.230992	0.360228	0.206779
1588.63	0.0982378	0.202778	0.33486	0.21133
1590.78	0.0915576	0.168169	0.303844	0.21708
1592.93	0.0856062	0.162232	0.308776	0.234469
1595.07	0.0806751	0.147108	0.307345	0.256378
1597.22	0.0788414	0.139672	0.312276	0.276166
1599.36	0.0798499	0.130949	0.317445	0.298393
1601.5	0.0780164	0.125687	0.327624	0.323099
1603.65	0.0772761	0.128028	0.333906	0.329404
1605.79	0.0743861	0.128877	0.333745	0.327788
1607.93	0.0730265	0.117991	0.330323	0.339732
1610.07	0.0706832	0.113155	0.333502	0.352554
1612.22	0.0716559	0.106644	0.342804	0.377856
1614.36	0.0719728	0.103444	0.352742	0.398877
1616.5	0.074221	0.104613	0.355999	0.402217
1618.64	0.072206	0.118309	0.353132	0.375717
1620.78	0.0707377	0.107844	0.333404	0.360895
1622.91	0.0732413	0.11108	0.322026	0.337513
1625.05	0.0731943	0.0982102	0.306591	0.33341
1627.19	0.0697586	0.0958198	0.303961	0.333026
1629.33	0.0677806	0.103304	0.31493	0.338601
1631.46	0.0668594	0.0976419	0.311027	0.341416
1633.6	0.0652459	0.090352	0.320245	0.367829
1635.73	0.0659282	0.0917947	0.325646	0.374162
1637.87	0.0659546	0.088126	0.33216	0.390454
1640	0.0654346	0.0833542	0.34432	0.417545
1642.14	0.0660807	0.0844804	0.354253	0.431636
1644.27	0.0671642	0.0754635	0.365617	0.464245
1646.4	0.0686485	0.0703894	0.379048	0.493854
1648.53	0.068639	0.0751668	0.397331	0.515462
1650.67	0.0711803	0.0741192	0.416488	0.547789
1652.8	0.0728107	0.075599	0.435246	0.575436
1654.93	0.0747692	0.0650712	0.446847	0.610842
1657.06	0.0752702	0.061427	0.461231	0.639687
1659.19	0.074241	0.0661459	0.479353	0.661131
1661.32	0.0826128	0.0609582	0.496917	0.697534
1663.44	0.0819846	0.0716767	0.518537	0.714977
1665.57	0.0837249	0.0652784	0.520115	0.727739
1667.7	0.0873601	0.0734635	0.527101	0.72582
1669.83	0.0902302	0.081452	0.527565	0.71378
1671.95	0.0937928	0.0925506	0.523813	0.69002
1674.08	0.0957157	0.0959852	0.509722	0.661979
1676.2	0.0990963	0.0941084	0.496744	0.644217
1678.33	0.0974849	0.0884202	0.472154	0.613974
1680.45	0.0994446	0.0848994	0.439531	0.56741
1682.58	0.103299	0.0965197	0.419474	0.516726
1684.7	0.10198	0.0981255	0.391701	0.469722
1686.82	0.0998586	0.0950501	0.361622	0.426516
1688.94	0.101345	0.100567	0.336236	0.37707
1691.07	0.0979124	0.0965211	0.307985	0.338342
1693.19	0.0965568	0.0994068	0.281166	0.290815
1695.31	0.0940718	0.0887408	0.251245	0.260006
1697.43	0.0883439	0.0896789	0.224902	0.216357
1699.55	0.0858227	0.0836469	0.196889	0.181187
1701.67	0.078346	0.0829227	0.176908	0.150376
1703.78	0.0742217	0.0686811	0.153109	0.135085
1705.9	0.070061	0.0703539	0.137899	0.108073
1708.02	0.0661556	0.0648922	0.12603	0.0978199
1710.14	0.060902	0.0590626	0.112967	0.0862464
1712.25	0.0604584	0.0623723	0.109367	0.0751922
1714.37	0.0580107	0.0572143	0.1037	0.0743773
1716.48	0.0538871	0.0520438	0.0925448	0.0648016
1718.6	0.0491441	0.0578823	0.0951481	0.0596253
1720.71	0.0456036	0.0620483	0.0964786	0.0550884
1722.83	0.0440309	0.0569295	0.0901737	0.0531907
1724.94	0.0361181	0.0607029	0.0903106	0.0473723
1727.05	0.0301002	0.0603313	0.0879021	0.0441133
1729.16	0.0273254	0.0557622	0.0850957	0.0469335
1731.27	0.0218907	0.0595157	0.0835614	0.0384731
1733.39	0.021776	0.044637	0.0722446	0.0441721
1735.5	0.0187464	0.0437958	0.0681647	0.0389903
1737.61	0.0135671	0.0416112	0.0655161	0.0382479
1739.72	0.0135257	0.0310729	0.0584135	0.0437448
1741.82	0.0131564	0.0308951	0.0571958	0.0420811
1743.93	0.0108196	0.0358468	0.0569322	0.0337367
1746.04	0.011325	0.0290631	0.0516579	0.0361516
1748.15	0.010373	0.0352099	0.0548136	0.0313659
1750.25	0.00800006	0.0236591	0.0448463	0.0338996
1752.36	0.00868801	0.0218001	0.0430705	0.0340325
1754.47	0.00660678	0.0217231	0.0409762	0.0308049
1756.57	0.00616537	0.0160021	0.0319624	0.0255366
1758.68	0.0102059	0.0148024	0.0312196	0.0262676
1760.78	0.0060845	0.0127918	0.0280906	0.0244781
1762.88	0.00210895	0.016192	0.0290969	0.0206478
1764.99	0.00374493	0.00772808	0.0206387	0.020657
1767.09	0.00457939	0.00696691	0.0227579	0.0252655
1769.19	0.00249893	0.00725495	0.0174008	0.0162334
1771.29	0.0030421	0.00127651	0.0157019	0.0230807
1773.39	0.00223719	0.0106561	0.0202857	0.0154073
1775.49	0.00281702	0.00988482	0.0182682	0.0134134
1777.6	0.00295971	0.00946531	0.019352	0.0158188
1779.69	0.00128062	0.00643984	0.0163796	0.0159036
1781.79	0.004958	0.00874119	0.0165085	0.0124278
1783.89	0.00265968	0.0100651	0.0179097	0.0125513
1785.99	0.00170968	0.00292487	0.0107213	0.0124743
1788.09	0.00214443	0.00159281	0.00894074	0.0117567
1790.18	0.00250641	0.00437163	0.0104207	0.00967846
1792.28	0.00137455	0.00218074	0.00848051	0.0100796
1794.38	0.000716495	0.00161261	0.00693774	0.00852021
1796.47	0.000240741	0.00271459	0.00793971	0.0083602
1798.57	0.000202352	0.00756402	0.0110888	0.00563959
1800.66	1.83261e-05	0.000653908	0.00485291	0.0067184
1802.75	-0.000311344	0.00266747	0.00649036	0.00611662
1804.85	0.00161825	-0.00264273	0.00200369	0.00743427
1806.94	0.00249126	0.0024798	0.00554938	0.00491133
1809.03	-0.000388719	-0.00224158	0.00130081	0.00566782
1811.12	-0.00137382	-0.00253146	-0.000641622	0.00302373
1813.21	-0.00203086	-0.00355341	-0.000516492	0.00485908
1815.3	-0.000100703	-0.00485931	-0.000550657	0.00689385
1817.39	0.00223038	-0.00236308	0.00076696	0.00500806
1819.48	-0.000138899	-0.0054525	-0.00117643	0.0068417
1821.57	0.00113571	0.00239567	0.00324241	0.00135478
1823.66	0.00270195	0.00286976	0.00328683	0.000667309
1825.75	-0.000796565	-0.000623852	0.0012632	0.00301928
1827.84	-0.000869809	-0.00168094	-0.000999258	0.00109069
1829.92	-0.00334783	-0.00754649	-0.00604552	0.00240156
1832.01	0.000514441	-4.823e-05	0.000996696	0.00167188
1834.1	0.000805919	-0.000643728	-0.000630195	2.16532e-05
1836.18	-0.00167176	0.000710567	-0.000507632	-0.00194912
1838.27	-0.000724173	-0.00425719	-0.00340746	0.00135957
1840.35	-0.000541662	-0.000730491	-0.000263162	0.000747726
1842.43	-0.000504789	-0.00588849	-0.0056289	0.000415343
1844.52	-0.0015245	-0.000693748	-0.000417228	0.000442431
1846.6	-0.00276272	-0.00586527	-0.00514716	0.00114898
1848.68	7.34068e-06	-0.0054967	-0.00478731	0.00113501
1850.76	8.24206e-06	-0.00261926	-0.00251893	0.000160518
1852.84	-0.00199483	-0.00137529	-0.00303436	-0.0026545
1854.92	-0.000390431	-0.00289918	-0.00474295	-0.00295004
1857	0.000120945	-0.00284187	-0.00239568	0.000713904
1859.08	0.00114257	-0.00763753	-0.0080017	-0.000582662
1861.16	-0.00122441	-0.0054622	-0.00358704	0.00300025
1863.24	-0.000821999	-0.00225625	-0.00434208	-0.00333734
1865.32	0.000199977	-0.00126223	-0.00135937	-0.000155429
1867.4	-0.00351485	-0.00254886	-0.00418263	-0.00261403
1869.47	-0.00347647	-0.0043585	-0.00477921	-0.000673136
1871.55	-0.000522938	-0.00645162	-0.00815958	-0.00273274
1873.63	-0.00245196	-0.00268262	-0.00255314	0.000207161
1875.7	0.000829744	-0.0026691	-0.0036275	-0.00153343
1877.78	-0.00226506	0.00283013	-0.000566445	-0.00543452
1879.85	-0.000586382	-0.00348283	-0.00474289	-0.00201609
1881.92	-0.0020048	-0.0017896	-0.00486344	-0.00491815
1884	-0.00393324	-0.00398688	-0.00657481	-0.0041407
1886.07	-0.00192627	-0.00406857	-0.0058209	-0.00280372
1888.14	-0.000684372	-0.00189781	-0.00546483	-0.00570723
1890.21	-0.00235738	-0.00376115	-0.00439315	-0.00101121
1892.29	-0.00275496	-0.00124517	-0.00149246	-0.00039567
1894.36	-0.00136695	-0.00237123	-0.00415911	-0.0028606
1896.43	-0.00234729	-0.00615156	-0.0077803	-0.00260599
1898.5	-0.00241656	-0.00441459	-0.0058345	-0.00227186
1900.57	-0.00255859	-0.00233658	-0.00404795	-0.00273819
1902.63	-0.00229969	-9.25136e-05	-0.00242062	-0.00372498
1904.7	-0.00134834	-0.00570409	-0.00659923	-0.00143223
1906.77	-0.00214589	0.00186442	-0.000598038	-0.00393993
1908.84	-6.47362e-05	-0.000113349	-0.00199341	-0.00300809
1910.9	0.00117847	-0.00169334	-0.00299128	-0.0020767
1912.97	-0.00308031	-0.00148196	-0.00589806	-0.00706577
1915.03	-8.78484e-05	0.000142504	-0.00506704	-0.00833527
1917.1	-0.00172287	-0.00231028	-0.00383854	-0.00244523
1919.16	0.000395326	0.00162971	0.000332449	-0.00207562
1921.23	-0.000328508	-0.000406095	-0.00297263	-0.00410646
1923.29	-0.000833592	-0.0073388	-0.0101749	-0.00453772
1925.35	-0.00283251	-0.00564362	-0.00767451	-0.00324944
1927.42	-0.00144259	0.00180809	-0.0028679	-0.00748157
1929.48	0.000166087	-0.000691327	-0.00378767	-0.00495414
1931.54	0.000390245	0.00260874	-0.00120821	-0.00610713
1933.6	-0.00106162	-0.0024084	-0.00332125	-0.00146056
1935.66	0.000255915	-0.00410699	-0.00686599	-0.0044144
1937.72	0.000881252	0.00329311	-0.00253731	-0.00932866
1939.78	0.000231386	-0.00185338	-0.00385547	-0.00320335
1941.84	-0.00202162	-0.00110678	-0.0039808	-0.00459844
1943.9	-0.00125016	-0.000308034	-0.00275425	-0.00391395
1945.96	-7.77701e-05	-0.00209697	-0.00614064	-0.00646987
1948.01	-0.00105509	0.00181293	-0.00252845	-0.0069462
1950.07	0.000226863	-0.000299073	-0.00281341	-0.00402294
1952.13	0.000452242	-0.00314219	-0.00627973	-0.00502007
1954.18	-0.00110771	0.00192915	-0.00115685	-0.00493761
1956.24	0.00283457	-0.00143623	-0.00589595	-0.00713555
1958.29	-0.000583466	-0.00203667	-0.00467035	-0.00421388
1960.35	-0.0015236	-0.00451152	-0.0060694	-0.00249261
1962.4	-0.00242718	-0.00181641	-0.00404874	-0.00357172
1964.45	-0.0016545	0.00157897	-0.00290305	-0.00717123
1966.5	-0.00088169	0.00286289	-0.000644059	-0.00561113
1968.56	-0.00145696	-0.000229444	-0.00323657	-0.0048114
1970.61	0.00161169	0.000559732	-0.0035228	-0.00653206
1972.66	0.00110954	0.00129636	-0.00166183	-0.0047331
1974.71	2.45179e-05	-0.00385875	-0.00711782	-0.00521451
1976.76	-0.00160695	0.000982007	-0.00167819	-0.00425631
1978.81	-0.000979147	-0.00145068	-0.00411223	-0.00425847
1980.86	-0.000642722	-0.000297487	-0.00328561	-0.004781
1982.91	-0.00263819	-0.00142557	-0.00476551	-0.0053439
1984.95	-4.23742e-05	-6.79328e-05	-0.00210992	-0.00326717
1987	-0.00123596	-0.00200202	-0.00677127	-0.0076308
1989.05	-0.00038891	-0.000728526	-0.00252527	-0.0028748
1991.1	-0.00125431	0.00375697	-0.00114249	-0.00783914
1993.14	-0.00142726	0.00426072	0.00055832	-0.00592384
1995.19	-0.00225597	-0.00126165	-0.00346722	-0.0035289
1997.23	-0.00108047	-0.00602436	-0.0099583	-0.00629431
1999.28	-0.00107086	-0.00175513	-0.00404268	-0.00366008
2001.32	0.000359953	0.00171705	-0.00114932	-0.00458618
2003.36	0.00109858	-0.0039275	-0.00557289	-0.00263263
2005.41	-0.0021344	0.00181053	-0.00108911	-0.00463942
2007.45	-0.00303523	-0.00484284	-0.00567194	-0.00132655
2009.49	-0.00269704	-0.00412392	-0.00723269	-0.00497402
2011.53	-0.00228586	-0.00191224	-0.00585089	-0.00630183
2013.57	-0.000562783	0.000301578	-0.00311715	-0.00546997
2015.61	-0.00164529	-0.00325148	-0.0068255	-0.00571844
2017.65	-0.00199892	-0.00316664	-0.00592116	-0.00440724
2019.69	0.000161788	-0.000243237	-0.00390346	-0.00585636
2021.73	0.000354983	7.59105e-05	-0.00284022	-0.00466581
2023.77	-0.000727017	-0.00171825	-0.00289048	-0.00187557
2025.81	-0.0037401	-0.00315964	-0.00508818	-0.00308566
2027.84	-0.00296352	-0.00327574	-0.00816078	-0.00781607
2029.88	-0.00255118	-0.00579503	-0.00558677	0.000333215
2031.91	-0.00294036	-0.00401154	-0.00516018	-0.00183782
2033.95	-0.00205407	0.00194159	0.000435868	-0.00240915
2035.99	-0.00266162	0.0028211	-0.000966901	-0.00606081
2038.02	0.000192561	-0.000851283	-0.00372176	-0.00459276
2040.05	0.000751286	0.00010065	-0.00210249	-0.00352502
2042.09	-0.00226077	-0.00189432	-0.0043803	-0.00397758
2044.12	-0.00417956	-0.00394167	-0.0053857	-0.00231044
2046.15	-0.00311032	-0.00264156	-0.00424381	-0.00256359
2048.19	-0.00109357	0.00411303	-0.00214762	-0.010017
2050.22	-0.00202815	-0.00631051	-0.00712975	-0.00131078
2052.25	-0.000958525	0.000957436	-0.00217057	-0.00500481
2054.28	-0.00356899	-0.00198916	-0.00405112	-0.00329913
2056.31	-0.00428456	-0.00434534	-0.00259143	0.00280626
2058.34	-0.00408905	-0.00163748	-0.00264287	-0.00160862
2060.37	-0.0024359	-0.000649826	-0.0034897	-0.00454379
2062.39	-0.0041349	1.53087e-05	-0.00473421	-0.00759923
2064.42	-0.00189849	0.00280896	0.000224606	-0.00413497
2066.45	-0.00370654	-0.00508628	-0.00515563	-0.000110962
2068.48	-0.0022715	-0.000987208	-0.00361673	-0.00420723
2070.5	-0.00320478	0.000318698	-0.00152116	-0.00294377
2072.53	-0.00348206	-0.000693083	-0.00149344	-0.00128057
2074.55	-0.00222882	0.000106503	-0.000829528	-0.00149765
2076.58	-0.00239652	0.000624489	-0.000722379	-0.00215499
2078.6	-0.000450695	0.00139728	-0.00141058	-0.00449259
2080.63	-0.00284084	-0.00534072	-0.00448474	0.00136957
2082.65	-0.00253446	-0.001593	-0.00342335	-0.00292856
2084.67	-0.0032482	-0.00529436	-0.00673618	-0.00230691
2086.7	-0.00257718	0.00430434	0.00267587	-0.00260555
2088.72	-0.00172383	0.00239837	0.00103311	-0.00218441
2090.74	-0.003421	-0.00144139	-0.00164359	-0.000323524
2092.76	-0.000417561	0.00205208	0.00108778	-0.00154289
2094.78	-0.00236954	0.000544281	-0.00103228	-0.00252249
2096.8	-0.00333756	0.00157269	-0.00164128	-0.00514234
2098.82	-0.00135398	-0.00251441	-0.00384093	-0.00212243
2100.84	-0.00013547	0.00316109	0.000321867	-0.00454276
2102.86	-0.00336224	-0.000944193	-0.000446261	0.000796691
2104.87	-0.000904574	-0.00261467	-0.00455474	-0.00310411
2106.89	-0.00198125	0.00117931	-7.39067e-05	-0.00200514
2108.91	-0.000252076	0.00287422	3.27271e-05	-0.00454638
2110.92	-0.00187505	-0.00313465	-0.00343956	-0.000487857
2112.94	-0.000109173	-0.00054701	0.000484518	0.00165045
2114.96	-0.00195052	-0.00209392	-0.00497611	-0.00461149
2116.97	-0.000293689	-0.00226463	-0.00383566	-0.00251364
2118.98	0.000124385	-0.000517102	-0.0023771	-0.002976
2121	-0.00153436	4.64866e-05	-0.00107762	-0.00179858
2123.01	-0.00133465	0.00425941	0.00459607	0.000538648
2125.02	-0.000478919	0.00386215	0.00438443	0.000835642
2127.04	0.00106926	0.00303377	0.000991537	-0.00326758
2129.05	-0.00109908	-0.00073136	0.000461776	0.00190902
2131.06	-0.00257498	0.000372056	-0.00149958	-0.00299462
2133.07	0.00112344	0.00376511	0.00425359	0.000781566
2135.08	0.000959576	-0.00161683	-0.00184337	-0.000362455
2137.09	-0.00139043	0.00207911	0.00176243	-0.000506693
2139.1	-0.00137183	0.000900981	0.000994036	0.000148888
2141.11	-0.00182679	-0.00143156	0.000146113	0.00252427
2143.11	0.000159711	0.00703022	0.00621738	-0.00130054
2145.12	0.000834589	0.00118043	0.00155197	0.000594465
2147.13	0.00136385	0.00115528	-0.00048892	-0.00263072
2149.14	0.000253543	0.00130681	0.00144674	0.000223898
2151.14	-0.00143963	0.00278815	0.00258712	-0.000321646
2153.15	0.00120343	0.00129226	0.00412514	0.00453261
2155.15	-0.0014733	0.00346761	0.00208429	-0.0022133
2157.16	0.000477712	0.00288336	0.00338373	0.000800594
2159.16	0.00151792	0.00366097	0.00269493	-0.00154567
2161.16	8.04754e-05	0.00462462	0.00439204	-0.000372129
2163.17	0.00235984	0.00283872	0.00433951	0.00240126
2165.17	0.00190649	0.00774106	0.00715011	-0.000945525
2167.17	0.00170835	0.00150433	0.000496532	-0.00161248
2169.17	0.00212979	0.000377853	0.000603105	0.000360404
2171.17	0.0018226	0.00503257	0.00476577	-0.00042688
2173.17	0.00428483	0.00432681	0.00479285	0.000745675
2175.17	0.00219246	0.000246796	0.00132059	0.00171807
2177.17	0.00173994	0.00474299	0.00444944	-0.000469678
2179.17	-0.00129955	0.00241509	0.00320409	0.0012624
2181.17	0.00254786	0.00734573	0.00561718	-0.00276567
2183.17	0.000164541	0.00626542	0.00651924	0.000406116
2185.17	-0.000469634	0.00155429	0.00249038	0.00149774
2187.16	0.00370613	0.00578499	0.00665326	0.00138923
2189.16	0.000558021	0.000353807	0.00182917	0.00236058
2191.16	0.00207409	0.00286069	0.000743037	-0.00338824
2193.15	0.00337167	0.00458503	0.00434929	-0.00037718
2195.15	0.00226449	0.00402154	0.00421762	0.000313739
2197.14	0.00272428	0.0026627	0.00416552	0.00240452
2199.13	0.00427734	0.006856	0.00546548	-0.00222483
2201.13	0.00196812	-4.54046e-05	0.00334564	0.00542568
2203.12	0.00148093	0.00659313	0.00719067	0.000956059
2205.11	0.00132183	0.00646682	0.00594578	-0.000833673
2207.1	0.00152724	0.00726733	0.00780261	0.000856449
2209.1	0.00227935	0.00384172	0.00393325	0.000146445
2211.09	0.00252147	0.00120203	0.00332474	0.00339634
2213.08	0.00218073	0.00137603	0.00295483	0.00252609
2215.07	0.00143931	0.00297079	0.00163062	-0.00214427
2217.06	0.000479389	0.00434018	0.00293096	-0.00225475
2219.05	0.00228889	0.00353236	0.00462903	0.00175466
2221.03	0.00216733	0.00376342	0.00569089	0.00308396
2223.02	0.00179084	0.00198196	0.00126518	-0.00114685
2225.01	0.00341856	0.00596042	0.0053493	-0.000977788
2227	0.000892517	0.00567184	0.00386633	-0.00288882
2228.98	0.00244765	4.51185e-05	0.000395149	0.000560049
2230.97	0.00127008	0.00299272	0.00129822	-0.00271119
2232.95	0.00104003	0.00648964	0.00657556	0.000137469
2234.94	-0.0010482	0.000713769	0.000480048	-0.000373954
2236.92	0.000981178	0.00149798	0.00201954	0.000834507
2238.91	0.00188112	0.00131498	-0.00113322	-0.00391713
2240.89	-0.000716823	-0.000386641	-0.00110467	-0.00114884
2242.87	0.000110523	0.00357949	0.00186658	-0.00274066
2244.85	-0.00277865	0.00283716	0.0020543	-0.00125257
2246.84	-0.000384194	0.00529933	0.00319649	-0.00336455
2248.82	0.00011563	0.000637571	-0.00091033	-0.00247664
2250.8	-0.000623288	0.00320857	0.00301558	-0.000308794
2252.78	-0.00026893	-0.00276386	-0.003477	-0.00114103
2254.76	0.00391154	0.000828331	-0.00225501	-0.00493334
2256.74	0.00175196	0.00204328	-0.000635314	-0.00428576
2258.72	-0.000261722	0.00162916	-0.00084473	-0.00395823
2260.7	-0.00161938	-0.00174108	-0.00423531	-0.00399077
2262.67	0.000266063	-0.00632745	-0.00571707	0.000976609
2264.65	0.000912764	0.00242814	0.000118092	-0.00369608
2266.63	-0.00241212	-0.00374125	-0.00589678	-0.00344884
2268.6	-0.0024939	0.00160413	-0.00507191	-0.0106817
2270.58	-0.000316384	0.000844634	-0.00170196	-0.00407455
2272.55	0.00204346	-0.0014747	-0.00596688	-0.00718749
2274.53	0.000103779	-0.00361504	-0.00665285	-0.0048605
2276.5	9.5442e-05	-0.00258291	-0.0051914	-0.00417358
2278.48	0.000743133	0.000290123	-0.00301406	-0.00528669
2280.45	0.00117233	-0.00385358	-0.0081535	-0.00687988
2282.42	-0.000110901	-0.00417764	-0.00812332	-0.0063131
2284.4	-4.57974e-05	0.00220652	-0.00268497	-0.00782639
2286.37	-0.00158381	-0.00182539	-0.00806272	-0.00997971
2288.34	0.000922909	-0.000765513	-0.0052487	-0.0071731
2290.31	-0.00221809	-0.000904859	-0.00593394	-0.00804652
2292.28	0.000143171	-0.00575752	-0.00773251	-0.00315998
2294.25	0.000136111	-0.00287226	-0.00491819	-0.00327349
2296.22	-0.00242146	-0.00477639	-0.0098183	-0.00806705
2298.19	-0.00173592	-0.00194542	-0.00708331	-0.00822063
2300.16	-0.00276281	-0.00280228	-0.00808618	-0.00845425
2302.12	-0.00211342	-0.00244121	-0.00702115	-0.00732791
2304.09	-0.00106307	6.22921e-06	-0.00531977	-0.00852159
2306.06	-0.00238104	0.000901764	-0.00497031	-0.00939531
2308.02	-0.000893154	-0.000484137	-0.0060523	-0.00890906
2309.99	-0.00144564	-0.000638345	-0.0057026	-0.00810281
2311.95	-0.00283606	-0.00218509	-0.00829547	-0.00977662
2313.92	-0.00408058	-0.00244109	-0.00929762	-0.0109704
2315.88	-0.00077023	-0.00115028	-0.00465295	-0.00560428
2317.85	-0.00124927	-0.00203774	-0.00621157	-0.00667813
2319.81	-0.00482538	-0.00634039	-0.0111104	-0.00763201
2321.77	-0.00399238	2.29717e-05	-0.00344322	-0.00554591
2323.74	-0.00308635	-0.000670202	-0.00905758	-0.0134198
2325.7	-0.00148786	-0.00211689	-0.00727547	-0.00825373
2327.66	-0.00320507	-0.0102323	-0.0141621	-0.00628765
2329.62	-0.000877544	-0.000270962	-0.00522196	-0.0079216
2331.58	-0.00325035	-0.00195741	-0.00765461	-0.00911553
2333.54	0.000243485	-0.00292608	-0.0071445	-0.00674947
2335.5	-0.00551775	0.00117364	-0.00719101	-0.0133834
2337.46	-0.00446497	-0.00481665	-0.0114525	-0.0106174
2339.42	-0.00344848	-0.0106615	-0.0149186	-0.00681132
2341.37	-0.00119296	0.000577773	-0.00550051	-0.00972526
2343.33	-0.00422079	-0.000553576	-0.00697809	-0.0102792
2345.29	-0.00196498	-0.00506432	-0.00853504	-0.00555315
2347.24	-0.0048832	0.00146552	-0.0076264	-0.0145471
2349.2	-0.000586581	-0.0044292	-0.00846732	-0.00646099
2351.16	0.000248585	0.0022915	-0.00596781	-0.0132149
2353.11	-0.00328864	0.00149234	-0.00601315	-0.0120088
2355.07	-0.00376495	-0.00669216	-0.0110688	-0.00700266
2357.02	-0.00128965	-0.00143686	-0.00928469	-0.0125565
2358.97	-0.00340536	0.00129106	-0.0062279	-0.0120303
2360.93	-0.00333467	-0.00124354	-0.00865864	-0.0118642
2362.88	-0.00271726	0.00135962	-0.0056016	-0.011138
2364.83	-0.00115233	-0.00279286	-0.00835019	-0.00889173
2366.78	-0.00206502	-0.00173178	-0.00998521	-0.0132055
2368.73	-0.00257675	-0.00268448	-0.010109	-0.0118792
2370.68	-0.00374421	-0.00384848	-0.00999403	-0.00983288
2372.63	-0.00148638	0.00209592	-0.00534567	-0.0119065
2374.58	-0.00400175	0.00057594	-0.00841165	-0.0143801
2376.53	-0.00604329	-0.00376269	-0.00829627	-0.00725374
2378.48	-0.00229106	-0.00202586	-0.00993041	-0.0126473
2380.43	-0.00236467	-0.00265485	-0.0114054	-0.0140008
2382.37	-0.00218305	0.00250797	-0.00468844	-0.0115143
2384.32	-0.003058	0.00307219	-0.00497013	-0.0128677
2386.27	-0.0031676	-0.00501923	-0.0110574	-0.00966108
2388.21	0.000512476	-0.00216415	-0.00974817	-0.0121344
2390.16	-0.000872156	-0.00612439	-0.0109042	-0.00764772
2392.1	-0.00203802	-0.00647748	-0.0132531	-0.010841
2394.05	-0.00218347	-0.00411813	-0.00836449	-0.00679416
2395.99	-0.00225591	-0.00244395	-0.00936101	-0.0110673
2397.93	-0.00323914	-0.00336058	-0.0101983	-0.0109404
2399.88	-0.00316553	-0.00275021	-0.00880859	-0.0096934
2401.82	-0.00152494	-0.00130567	-0.00725967	-0.00952639
2403.76	-0.00261705	0.00298884	-0.00483573	-0.0125193
2405.7	-0.00155918	8.61377e-05	-0.00455896	-0.00743215
2407.64	-0.000865534	0.00155153	-0.00308906	-0.00742494
2409.59	-0.00312321	-0.00658105	-0.0121171	-0.00885766
2411.52	-0.00228352	-0.000606669	-0.00873812	-0.0130103
2413.46	-0.00311983	-0.00490152	-0.0114033	-0.0104029
2415.4	-0.00289929	-0.000999868	-0.00667201	-0.00907543
2417.34	-0.00264217	0.000512087	-0.00790534	-0.0134679
2419.28	0.000566566	-0.00259662	-0.00730928	-0.00754025
2421.22	-0.00394937	-0.000728024	-0.00623587	-0.00881255
2423.15	-0.000521716	-0.000636167	-0.00738915	-0.0108048
2425.09	-0.00376204	0.00264158	-0.0052815	-0.0126769
2427.03	-0.000880652	-0.00274974	-0.0100929	-0.011749
2428.96	-0.00218947	0.00289121	-0.0042469	-0.011421
2430.9	-0.00327952	-6.61147e-05	-0.00714917	-0.0113329
2432.83	-0.00163658	0.00112839	-0.00694956	-0.0129247
2434.77	-0.00403809	0.000386766	-0.00738601	-0.0124364
2436.7	-0.00257704	0.00275621	-0.00543633	-0.0131081
2438.63	-0.00315636	0.00907731	0.000490046	-0.0137396
2440.57	-0.0036991	0.00342076	-0.00328617	-0.0107311
2442.5	-0.000852968	-0.00236067	-0.0070622	-0.00752246
2444.43	-0.000994593	-0.000877146	-0.00487323	-0.00639374
2446.36	-0.00255714	-0.000863162	-0.00697872	-0.0097849
2448.29	-0.00288066	-6.42005e-06	-0.00614141	-0.00981598
2450.22	-0.00349553	0.00257326	-0.00578109	-0.013367
2452.15	-0.00228836	0.00338197	-0.00184167	-0.00835783
2454.08	-0.00213774	-0.00692729	-0.0109452	-0.0064286
2456.01	-0.0014404	-0.00292005	-0.0101071	-0.0114993
2457.94	-0.0016903	0.00219058	-0.00219056	-0.00700983
2459.86	-0.00190361	-0.000808012	-0.00540819	-0.00736029
2461.79	-0.00295484	0.00364272	-0.00425142	-0.0126306
2463.72	-0.000617205	-0.00288482	-0.00929786	-0.0102609
2465.64	-0.00203252	-0.000320884	-0.00440275	-0.00653098
2467.57	0.00128924	-0.000426162	-0.00555177	-0.00820097
2469.49	-0.00154685	0.00125194	-0.00216736	-0.00547086
2471.42	-0.000702573	-0.00103248	-0.00427038	-0.00518064
2473.34	-0.00182578	-0.00247598	-0.0056574	-0.00509028
2475.27	-0.000871892	-0.00548482	-0.00950971	-0.00643981
2477.19	-0.000719479	-0.00139028	-0.00628353	-0.00782921
2479.11	0.00140072	0.00222405	0.00123749	-0.0015785
2481.04	0.00133481	-0.000590967	-0.00404574	-0.00552764
2482.96	-0.00157311	-0.00120043	-0.00177335	-0.000916676
2484.88	0.00113055	-0.00374974	-0.00459072	-0.00134556
2486.8	-0.000975443	-0.00637629	-0.00701025	-0.00101434
2488.72	0.000453192	0.00026368	0.00051183	0.000397041
2490.64	-0.00219906	-0.0030898	-0.00238447	0.00112853
2492.56	0.000286568	0.000792307	-0.00027008	-0.00169982
2494.48	0.00146059	-0.00187232	-0.00292734	-0.00168804
2496.4	0.00139587	-0.00419152	-0.0047891	-0.000956131
2498.31	0.00318963	0.00285375	0.00193871	-0.00146407
2500.23	0.000975381	0.000162304	-0.00119512	-0.00217188
2502.15	-0.000109144	-0.00197011	-0.00329481	-0.00211953
2504.06	0.00150288	0.00712351	0.0020816	-0.00806705
2505.98	0.00231342	-0.00478536	-0.00311937	0.00266559
2507.9	0.00184879	-0.00241383	0.000110162	0.00403838
2509.81	0.001275	-0.00314325	-0.00326118	-0.000188696
2511.72	0.00077423	-0.0002463	-0.000906052	-0.0010556
2513.64	0.00213194	-0.0039389	-0.00539039	-0.00232237
2515.55	0.00341693	-0.00440797	-0.00112607	0.00525103
2517.47	0.00207854	0.00125933	0.00377469	0.00402457
2519.38	0.000667433	-0.00363257	-0.00245864	0.00187828
2521.29	0.00184356	-0.00217124	-0.000738646	0.00229216
2523.2	0.00385791	-0.00339153	0.000424833	0.00610618
2525.11	0.00182781	0.000515354	0.00294059	0.00388038
2527.02	-0.000457207	0.0015136	0.0035478	0.00325472
2528.93	0.00188554	0.00281402	0.0055073	0.00430925
2530.84	0.00145916	-0.00428166	-0.000804195	0.00556395
2532.75	0.00044992	0.00293008	0.00266682	-0.000421203
2534.66	0.00293887	-0.0020935	0.00112765	0.00515383
2536.57	-0.000438524	-0.00368977	6.58672e-05	0.00600903
2538.48	0.00084828	-0.0028406	-0.000200347	0.00422441
2540.38	0.00290043	-0.00324788	-0.00189791	0.00215995
2542.29	0.000835254	0.000682304	0.00364211	0.00473568
2544.19	0.00183101	-0.00185877	0.00178598	0.0058316
2546.1	0.00187953	-0.00570005	0.00167975	0.0118077
2548.01	0.000980825	-0.0112805	-0.00701557	0.00682395
2549.91	0.00354386	-0.00440035	0.0011499	0.00888039
2551.81	0.00111507	-0.00411405	0.00152159	0.00901703
2553.72	0.00382416	-0.00653202	0.000939133	0.0119538
2555.62	0.00259812	0.00545325	0.00831004	0.00457086
2557.52	0.00264756	-0.00436351	0.00247902	0.010948
2559.43	0.0025514	-0.00270235	0.00635105	0.0144854
2561.33	0.00267401	1.18961e-05	0.00632628	0.010103
2563.23	0.00388991	-0.00460058	0.00407491	0.0138808
2565.13	0.00372133	-0.00694312	0.0052436	0.0194988
2567.03	0.00391728	-0.000440842	0.0107072	0.0178369
2568.93	0.0018178	-0.00506559	0.00296896	0.0128553
2570.83	0.00121242	-0.0024265	0.00731966	0.0155939
2572.73	0.00501617	-0.00118432	0.00777356	0.0143326
2574.63	0.00317222	-0.00212136	0.00727338	0.0150316
2576.52	0.00293167	0.000490587	0.0128973	0.0198507
2578.42	0.00342004	-0.0090129	0.00420593	0.0211501
2580.32	0.00398144	0.00219648	0.0128525	0.0170497
2582.22	0.00432436	-0.00326023	0.0106832	0.0223095
2584.11	0.00525045	-0.00426946	0.0106615	0.0238895
2586.01	0.00468273	-0.0025586	0.013185	0.0251897
2587.9	0.00338641	-0.00186055	0.0119708	0.0221301
2589.8	0.00424007	-0.00165785	0.0108364	0.0199908
2591.69	0.00538539	-0.00359832	0.010259	0.0221716
2593.58	0.00474541	-0.000988959	0.0114315	0.0198727
2595.48	0.00370477	-0.00369714	0.00966161	0.021374
2597.37	0.00528781	-0.00207459	0.0145726	0.0266355
2599.26	0.00399241	-0.00505032	0.0107355	0.0252572
2601.15	0.00481056	-0.00424702	0.0104775	0.0235592
2603.04	0.00318752	-0.00115128	0.0149121	0.0257014
2604.93	0.00590074	-0.00266869	0.0173587	0.0320438
2606.82	0.00507965	-0.00218049	0.014636	0.0269064
2608.71	0.0057891	-0.000554049	0.0147768	0.0245293
2610.6	0.00504119	0.000620187	0.0153154	0.0235124
2612.49	0.00611532	0.00408436	0.0218192	0.0283757
2614.38	0.00431102	-0.00233083	0.0155187	0.0285593
2616.27	0.00593203	0.00708077	0.0250452	0.0287431
2618.15	0.00277984	-0.00248417	0.0187453	0.0339671
2620.04	0.00359953	0.000547552	0.0189672	0.0294714
2621.93	0.00212378	0.000828926	0.0218139	0.0335759
2623.81	0.00443773	-0.00243393	0.0186165	0.0336806
2625.7	0.00525788	0.0060897	0.0279057	0.0349056
2627.58	0.00414698	0.00330226	0.0238341	0.0328509
2629.47	0.00547757	0.00371399	0.0250117	0.0340764
2631.35	0.00360178	0.00293724	0.025951	0.0368221
2633.23	0.00522418	0.00118658	0.0216416	0.0327281
2635.12	0.00615441	0.00627742	0.0272738	0.0335943
2637	0.00588235	0.00291512	0.0258281	0.0366608
2638.88	0.00655783	0.00674997	0.0282797	0.0344475
2640.76	0.0039905	0.00366307	0.0259596	0.0356745
2642.64	0.00353671	0.00142146	0.02531	0.0382217
2644.52	0.0045406	0.00433888	0.0256946	0.0341692
2646.4	0.00503451	0.00111362	0.0240117	0.036637
2648.28	0.00705896	0.00211252	0.0275781	0.040745
2650.16	0.00653292	0.0049664	0.0294747	0.0392132
2652.04	0.00764673	0.0101312	0.0346323	0.0392018
2653.92	0.00464323	0.00214846	0.0266676	0.0392306
2655.8	0.00798007	0.00487053	0.0306328	0.0412196
2657.67	0.00658014	0.00356649	0.0288721	0.040489
2659.55	0.00682007	0.0023777	0.0313268	0.0463185
2661.43	0.00880917	0.00613671	0.0341795	0.0448684
2663.3	0.00697245	0.00368539	0.032022	0.0453385
2665.18	0.00943555	0.00119092	0.0304215	0.0467689
2667.05	0.00821859	0.00494591	0.0323207	0.0437996
2668.93	0.00864148	0.00182903	0.0303231	0.0455906
2670.8	0.0116516	0.00431585	0.0336545	0.0469418
2672.67	0.00930555	0.00273952	0.0349978	0.0516133
2674.55	0.0108949	0.00182753	0.0330807	0.0500051
2676.42	0.0116828	0.00811628	0.0403895	0.0516371
2678.29	0.0116328	-0.00470388	0.0348146	0.0632295
2680.16	0.00943311	0.00698042	0.0429192	0.0575021
2682.03	0.0101122	0.00571612	0.0440255	0.061295
2683.9	0.0106456	0.00209976	0.0446549	0.0680882
2685.77	0.0124181	-5.22389e-05	0.0420238	0.0673217
2687.64	0.0102919	-0.00648365	0.0393135	0.0732755
2689.51	0.0134129	-0.00429793	0.0430455	0.0757495
2691.38	0.0149308	-0.00136863	0.0453463	0.0747439
2693.25	0.0164489	-0.00857718	0.0439094	0.0839785
2695.11	0.0168011	-0.0056956	0.0475628	0.0852135
2696.98	0.0208701	-0.00463002	0.0522504	0.0910087
2698.85	0.0214412	-0.00617459	0.0510531	0.0915642
2700.71	0.0166197	-0.00573374	0.0557413	0.0983601
2702.58	0.0201062	-0.00698179	0.0500908	0.0913162
2704.44	0.0212244	0.00257616	0.0620965	0.0952326
2706.31	0.0217961	-0.0217083	0.04571	0.107869
2708.17	0.0222223	-0.0104429	0.0556485	0.105746
2710.04	0.0192599	-0.00631207	0.0562028	0.100024
2711.9	0.0211075	-0.0119601	0.0540532	0.105621
2713.76	0.0205139	-0.00648045	0.0624816	0.110339
2715.62	0.0230905	-0.0107583	0.0628777	0.117818
2717.49	0.0261045	-0.0123968	0.0600133	0.115856
2719.35	0.0246004	-0.00744234	0.071942	0.127015
2721.21	0.0248091	-0.0128843	0.0646246	0.124014
2723.07	0.0256009	-0.0151721	0.0727364	0.140654
2724.93	0.0260649	-0.0123231	0.0788603	0.145893
2726.79	0.0245614	-0.0128623	0.0838712	0.154774
2728.65	0.0287788	-0.0137031	0.0849057	0.157774
2730.5	0.0281138	-0.0136807	0.0896786	0.165375
2732.36	0.0269751	-0.0100427	0.0969172	0.171136
2734.22	0.0302092	-0.00629805	0.105588	0.179017
2736.08	0.0291074	-0.0153626	0.103124	0.189579
2737.93	0.0299733	-0.0116461	0.105592	0.187581
2739.79	0.0309487	-0.0174379	0.104402	0.194943
2741.64	0.0324708	-0.00929869	0.108143	0.187906
2743.5	0.0341024	-0.00480951	0.112759	0.188109
2745.35	0.0336572	-0.00632327	0.109422	0.185193
2747.21	0.0347426	-0.0185962	0.106802	0.200636
2749.06	0.0356823	-0.00770455	0.112771	0.19276
2750.91	0.0375332	-0.00622563	0.114127	0.192565
2752.77	0.0440847	-0.00130109	0.115405	0.186729
2754.62	0.0413811	-0.0112749	0.107934	0.190734
2756.47	0.0404996	-0.00684195	0.11462	0.19434
2758.32	0.0424968	-0.0154586	0.106832	0.195665
2760.17	0.0459882	-0.0125087	0.108986	0.194391
2762.02	0.0449978	-0.0143851	0.106289	0.193078
2763.87	0.0441169	-0.0113417	0.107886	0.190765
2765.72	0.0458233	-0.0152187	0.109564	0.199652
2767.57	0.0455986	-0.0174011	0.104561	0.195139
2769.42	0.0459207	-0.0178737	0.108943	0.202907
2771.27	0.0468259	-0.0151431	0.108554	0.197915
2773.12	0.0452899	-0.0231031	0.107449	0.208883
2774.96	0.0444828	-0.0290672	0.104515	0.213732
2776.81	0.0458986	-0.0166133	0.1155	0.211381
2778.65	0.0451648	-0.0360143	0.104455	0.224751
2780.5	0.0472003	-0.0232511	0.115599	0.222161
2782.35	0.044317	-0.0275931	0.106464	0.214491
2784.19	0.0464622	-0.0294856	0.112678	0.227461
2786.03	0.0455832	-0.0293439	0.107201	0.218472
2787.88	0.047255	-0.0288218	0.110155	0.222364
2789.72	0.0468136	-0.0296579	0.108577	0.221175
2791.56	0.0481942	-0.0403936	0.105248	0.233027
2793.41	0.0491378	-0.0438105	0.0996143	0.22948
2795.25	0.0502636	-0.046079	0.103604	0.239492
2797.09	0.0519363	-0.0402765	0.104889	0.232265
2798.93	0.0548115	-0.0472255	0.103074	0.240479
2800.77	0.0550633	-0.05003	0.106428	0.250333
2802.61	0.0571372	-0.0566264	0.104215	0.257347
2804.45	0.0574258	-0.0558578	0.107093	0.260721
2806.29	0.0613948	-0.0595181	0.107267	0.266856
2808.13	0.0605542	-0.0611563	0.112213	0.277392
2809.96	0.0629931	-0.0652719	0.117558	0.292527
2811.8	0.0676185	-0.0647601	0.12338	0.301023
2813.64	0.0665596	-0.071606	0.122919	0.31124
2815.47	0.0667763	-0.0713167	0.128344	0.319457
2817.31	0.0696896	-0.0833303	0.125816	0.334634
2819.15	0.0741698	-0.0888064	0.130526	0.350931
2820.98	0.0759538	-0.0867941	0.137224	0.358429
2822.82	0.0759889	-0.0913433	0.145036	0.378208
2824.65	0.0750768	-0.10442	0.144896	0.398906
2826.48	0.0828371	-0.0996102	0.151993	0.402565
2828.32	0.081233	-0.100318	0.159648	0.415945
2830.15	0.0833822	-0.100042	0.169211	0.430805
2831.98	0.0870619	-0.110681	0.171935	0.452185
2833.81	0.0875717	-0.108251	0.176727	0.455966
2835.64	0.0934744	-0.115204	0.187087	0.483667
2837.48	0.0905593	-0.113687	0.193868	0.492088
2839.31	0.0943125	-0.116109	0.19906	0.50427
2841.14	0.100034	-0.119092	0.211965	0.529692
2842.97	0.0997789	-0.120269	0.219702	0.543955
2844.79	0.103897	-0.119113	0.232848	0.563138
2846.62	0.107542	-0.119076	0.249174	0.589201
2848.45	0.1043	-0.127995	0.26232	0.624505
2850.28	0.108491	-0.141273	0.273558	0.663729
2852.11	0.109257	-0.129403	0.291318	0.673153
2853.93	0.11334	-0.154672	0.30534	0.736018
2855.76	0.118188	-0.151339	0.335189	0.778444
2857.58	0.118153	-0.162803	0.362891	0.84111
2859.41	0.124021	-0.166241	0.387969	0.886736
2861.23	0.126064	-0.175233	0.428794	0.966442
2863.06	0.133645	-0.188274	0.472244	1.05683
2864.88	0.133866	-0.204888	0.512673	1.1481
2866.71	0.14316	-0.218128	0.5636	1.25076
2868.53	0.144402	-0.227076	0.630195	1.37163
2870.35	0.153733	-0.248827	0.693211	1.50726
2872.17	0.164667	-0.254317	0.76609	1.63265
2873.99	0.169516	-0.264547	0.838253	1.76448
2875.81	0.177172	-0.256988	0.906281	1.86123
2877.64	0.188398	-0.251875	0.968663	1.95286
2879.46	0.199515	-0.244783	0.987223	1.97121
2881.27	0.209867	-0.246328	1.00252	1.99816
2883.09	0.215956	-0.259922	1.01782	2.04439
2884.91	0.231775	-0.231171	1.03742	2.02975
2886.73	0.238811	-0.237897	1.04206	2.04794
2888.55	0.254302	-0.208963	1.06619	2.04025
2890.37	0.261412	-0.211097	1.08078	2.067
2892.18	0.269287	-0.216821	1.09775	2.10332
2894	0.274903	-0.214841	1.12268	2.14003
2895.81	0.279172	-0.205223	1.15134	2.17051
2897.63	0.281582	-0.186857	1.16943	2.17006
2899.44	0.279547	-0.176786	1.20342	2.20834
2901.26	0.27988	-0.179933	1.23312	2.26089
2903.07	0.27606	-0.181481	1.25097	2.29193
2904.89	0.273807	-0.206691	1.28441	2.38577
2906.7	0.278732	-0.192796	1.33153	2.43892
2908.51	0.283475	-0.213027	1.38477	2.55648
2910.32	0.281295	-0.221967	1.45981	2.69084
2912.14	0.292014	-0.219831	1.53484	2.80748
2913.95	0.30113	-0.21806	1.61576	2.93411
2915.76	0.310429	-0.196663	1.70328	3.03991
2917.57	0.322278	-0.212701	1.77657	3.18283
2919.38	0.331686	-0.207084	1.85479	3.29899
2921.19	0.339819	-0.213925	1.9649	3.48611
2922.99	0.347078	-0.193469	2.0688	3.61964
2924.8	0.354045	-0.189327	2.16762	3.77112
2926.61	0.360539	-0.12823	2.29594	3.87868
2928.42	0.361676	-0.115949	2.388	4.00632
2930.23	0.369847	-0.0759496	2.46018	4.0578
2932.03	0.371094	-0.0533132	2.52599	4.12689
2933.84	0.37307	-0.0312216	2.58664	4.18857
2935.64	0.375447	0.0029265	2.64124	4.2213
2937.45	0.38431	0.0358791	2.70689	4.27362
2939.25	0.387635	0.0413755	2.73207	4.30511
2941.06	0.394385	0.057883	2.76313	4.32839
2942.86	0.401463	0.135353	2.79968	4.26292
2944.66	0.413825	0.174182	2.79908	4.19984
2946.47	0.432855	0.209723	2.7658	4.08973
2948.27	0.443359	0.2282	2.70374	3.96086
2950.07	0.460422	0.241481	2.6299	3.82147
2951.87	0.47548	0.290788	2.55518	3.62303
2953.67	0.483798	0.288234	2.47546	3.49956
2955.47	0.483226	0.285429	2.36544	3.32801
2957.27	0.481305	0.26218	2.27307	3.21742
2959.07	0.475923	0.251919	2.18619	3.09483
2960.87	0.467079	0.236475	2.11498	3.0056
2962.67	0.455685	0.226076	2.05156	2.92077
2964.47	0.446186	0.224226	2.00787	2.85382
2966.27	0.435959	0.221027	1.9528	2.77084
2968.06	0.427517	0.204334	1.90879	2.72713
2969.86	0.41186	0.225074	1.88204	2.65114
2971.66	0.39471	0.246034	1.84773	2.56272
2973.45	0.383936	0.230255	1.81406	2.53409
2975.25	0.371049	0.235294	1.77983	2.47126
2977.04	0.360859	0.253449	1.74982	2.3942
2978.84	0.345094	0.256678	1.71321	2.33045
2980.63	0.336215	0.264802	1.67565	2.25735
2982.42	0.322965	0.247982	1.62456	2.20253
2984.22	0.30822	0.251712	1.56735	2.10502
2986.01	0.296136	0.248353	1.51865	2.03248
2987.8	0.2854	0.239883	1.47767	1.98046
2989.59	0.271859	0.263419	1.43064	1.86756
2991.38	0.255512	0.248546	1.3716	1.79689
2993.17	0.240586	0.245284	1.31408	1.71007
2994.96	0.230288	0.258804	1.26721	1.61345
2996.75	0.214087	0.247637	1.20388	1.52999
2998.54	0.20696	0.23627	1.13968	1.44545
3000.33	0.192508	0.228665	1.08096	1.36368
3002.12	0.185818	0.227944	1.03115	1.28514
3003.91	0.173517	0.2303	0.978324	1.19684
3005.7	0.169086	0.205634	0.912372	1.13078
3007.48	0.159445	0.210326	0.863679	1.04537
3009.27	0.153703	0.190662	0.810929	0.992428
3011.05	0.145994	0.191128	0.767486	0.922173
3012.84	0.141309	0.190746	0.729769	0.862437
3014.63	0.129737	0.185932	0.687996	0.803302
3016.41	0.12549	0.184906	0.656961	0.755288
3018.19	0.122518	0.181012	0.624733	0.709954
3019.98	0.117178	0.172813	0.59505	0.67558
3021.76	0.112567	0.173819	0.573798	0.639967
3023.54	0.110616	0.155827	0.540299	0.615155
3025.33	0.109831	0.139843	0.518332	0.605583
3027.11	0.104527	0.15427	0.509727	0.568731
3028.89	0.104435	0.154846	0.498021	0.549081
3030.67	0.101792	0.143461	0.48043	0.53915
3032.45	0.102721	0.14437	0.473257	0.52622
3034.23	0.0994586	0.138525	0.460757	0.515571
3036.01	0.0996219	0.138508	0.460584	0.515322
3037.79	0.0988381	0.148266	0.474012	0.521193
3039.57	0.098601	0.144344	0.46716	0.516506
3041.35	0.0998215	0.146664	0.474226	0.524098
3043.12	0.0990382	0.138701	0.479383	0.545091
3044.9	0.103356	0.150212	0.488916	0.541925
3046.68	0.100824	0.150785	0.499085	0.557279
3048.45	0.102118	0.149621	0.500267	0.561034
3050.23	0.100716	0.155995	0.515288	0.574869
3052.01	0.107002	0.149851	0.523391	0.597665
3053.78	0.103378	0.157177	0.54239	0.616341
3055.55	0.104891	0.166031	0.558367	0.627738
3057.33	0.106077	0.159737	0.573947	0.662735
3059.1	0.106206	0.162599	0.586982	0.679013
3060.88	0.104841	0.164135	0.601767	0.700211
3062.65	0.108141	0.167652	0.627608	0.73593
3064.42	0.108234	0.171201	0.636907	0.745129
3066.19	0.107525	0.185857	0.646762	0.737449
3067.96	0.111991	0.201926	0.647632	0.713129
3069.73	0.112996	0.201674	0.639355	0.70029
3071.5	0.11564	0.20398	0.624638	0.673052
3073.27	0.113985	0.205132	0.609841	0.647534
3075.04	0.115427	0.214606	0.587091	0.595976
3076.81	0.119602	0.21711	0.572772	0.569059
3078.58	0.122903	0.21696	0.558374	0.546263
3080.35	0.125038	0.233639	0.545806	0.499467
3082.12	0.128959	0.219563	0.529182	0.495391
3083.88	0.135649	0.242056	0.539679	0.476197
3085.65	0.141101	0.230459	0.522261	0.466882
3087.42	0.142653	0.235601	0.515182	0.447328
3089.18	0.150546	0.242136	0.513671	0.434455
3090.95	0.154942	0.244886	0.5155	0.432982
3092.71	0.160977	0.248116	0.516535	0.42947
3094.48	0.164826	0.253334	0.522183	0.430159
3096.24	0.168492	0.264485	0.522264	0.412448
3098	0.176313	0.2531	0.517336	0.422777
3099.77	0.177248	0.264218	0.524735	0.416827
3101.53	0.184632	0.268182	0.530305	0.419397
3103.29	0.182214	0.277215	0.53007	0.404569
3105.05	0.189963	0.279593	0.541606	0.41922
3106.81	0.18893	0.286032	0.548927	0.420632
3108.58	0.190849	0.276533	0.542411	0.425405
3110.34	0.189526	0.285962	0.555698	0.431578
3112.1	0.192611	0.303585	0.572405	0.430112
3113.86	0.192053	0.303748	0.574877	0.433806
3115.61	0.193681	0.302245	0.580133	0.444621
3117.37	0.191228	0.302838	0.579186	0.442157
3119.13	0.19344	0.315615	0.592873	0.443613
3120.89	0.196344	0.320924	0.606243	0.456509
3122.64	0.199503	0.338335	0.627089	0.462006
3124.4	0.19778	0.339155	0.62837	0.462744
3126.16	0.204182	0.34243	0.634981	0.468082
3127.91	0.205629	0.352495	0.643183	0.465101
3129.67	0.20489	0.356051	0.651226	0.47228
3131.42	0.209107	0.369755	0.671518	0.48282
3133.18	0.20917	0.362468	0.670018	0.492081
3134.93	0.211346	0.373752	0.675915	0.483462
3136.69	0.214543	0.374198	0.689925	0.505163
3138.44	0.212129	0.381086	0.692801	0.498745
3140.19	0.212229	0.380066	0.696871	0.506888
3141.94	0.214552	0.383564	0.703009	0.511111
3143.69	0.21294	0.384228	0.710738	0.522415
3145.45	0.215518	0.390867	0.719342	0.525559
3147.2	0.21602	0.390465	0.72063	0.528264
3148.95	0.216922	0.403604	0.739335	0.53717
3150.7	0.219537	0.40768	0.748577	0.545436
3152.45	0.214537	0.408055	0.749469	0.546262
3154.19	0.216898	0.406433	0.760064	0.56581
3155.94	0.220024	0.410872	0.76032	0.559117
3157.69	0.219287	0.418402	0.774018	0.568986
3159.44	0.21877	0.425001	0.78366	0.573855
3161.19	0.21858	0.417531	0.784633	0.587364
3162.93	0.22003	0.431717	0.799764	0.588874
3164.68	0.220789	0.423807	0.799148	0.600545
3166.42	0.222421	0.433227	0.811337	0.604976
3168.17	0.225658	0.436957	0.826787	0.623728
3169.91	0.223611	0.449268	0.837943	0.62188
3171.66	0.222183	0.453832	0.843452	0.623393
3173.4	0.227096	0.462842	0.858108	0.632426
3175.15	0.229495	0.460389	0.862426	0.64326
3176.89	0.232368	0.468491	0.871675	0.645095
3178.63	0.237026	0.465379	0.875835	0.65673
3180.37	0.234506	0.46063	0.881108	0.672766
3182.11	0.240404	0.4915	0.908651	0.667442
3183.86	0.239961	0.481181	0.914005	0.692519
3185.6	0.244183	0.494438	0.923336	0.686237
3187.34	0.244397	0.490967	0.926464	0.696795
3189.08	0.247526	0.5059	0.947647	0.706794
3190.82	0.24774	0.511582	0.954752	0.709073
3192.56	0.253165	0.508401	0.962972	0.727313
3194.29	0.255165	0.514277	0.974373	0.736153
3196.03	0.255343	0.516711	0.982832	0.745794
3197.77	0.25942	0.524045	1.00314	0.766556
3199.51	0.260764	0.528677	1.0085	0.767718
3201.24	0.265789	0.53454	1.02714	0.788161
3202.98	0.259737	0.5377	1.0321	0.791045
3204.72	0.267714	0.543426	1.04788	0.807129
3206.45	0.269277	0.554166	1.05117	0.795213
3208.19	0.268728	0.551041	1.05948	0.813498
3209.92	0.26898	0.564688	1.07343	0.813984
3211.65	0.274042	0.580719	1.08929	0.813711
3213.39	0.27834	0.564494	1.09099	0.842397
3215.12	0.276734	0.572842	1.10232	0.847165
3216.85	0.282598	0.5744	1.11031	0.857453
3218.58	0.280483	0.578645	1.11281	0.854662
3220.32	0.2854	0.573973	1.12247	0.877591
3222.05	0.286346	0.580541	1.12887	0.877321
3223.78	0.288567	0.590321	1.14075	0.880692
3225.51	0.287655	0.585996	1.14509	0.894543
3227.24	0.294869	0.600757	1.1619	0.897835
3228.97	0.289839	0.599128	1.16528	0.905847
3230.7	0.298	0.608832	1.17494	0.90578
3232.43	0.293882	0.610433	1.18675	0.922114
3234.15	0.297781	0.615026	1.19491	0.927808
3235.88	0.298473	0.60487	1.19033	0.936743
3237.61	0.300367	0.621735	1.20413	0.931838
3239.34	0.300622	0.601763	1.19797	0.953934
3241.06	0.300185	0.615078	1.21002	0.951911
3242.79	0.301206	0.611866	1.215	0.965008
3244.51	0.307583	0.622477	1.23707	0.983346
3246.24	0.306126	0.633381	1.24276	0.975004
3247.96	0.301864	0.624662	1.24805	0.997423
3249.69	0.308642	0.624674	1.2574	1.01236
3251.41	0.307841	0.62397	1.26603	1.0273
3253.13	0.310029	0.623692	1.26457	1.0254
3254.86	0.309957	0.614753	1.26994	1.04831
3256.58	0.309923	0.638809	1.29059	1.04285
3258.3	0.31335	0.622703	1.28602	1.06131
3260.02	0.317105	0.62993	1.29736	1.06789
3261.74	0.309928	0.633765	1.30886	1.08016
3263.46	0.315724	0.641553	1.31647	1.07986
3265.18	0.317111	0.645969	1.3228	1.08293
3266.9	0.315073	0.636234	1.33613	1.11983
3268.62	0.320032	0.628649	1.33761	1.13434
3270.34	0.323678	0.633265	1.34744	1.14269
3272.06	0.321459	0.625815	1.34646	1.15303
3273.78	0.320952	0.633741	1.3648	1.1697
3275.49	0.319498	0.636217	1.36692	1.16913
3277.21	0.320084	0.621793	1.36332	1.18644
3278.93	0.325189	0.64691	1.38325	1.17815
3280.64	0.326213	0.631149	1.37989	1.19798
3282.36	0.327529	0.642651	1.39298	1.20053
3284.07	0.33012	0.635756	1.39558	1.21572
3285.79	0.330453	0.641648	1.3927	1.20168
3287.5	0.329692	0.643035	1.40158	1.21367
3289.22	0.332029	0.649056	1.41675	1.2283
3290.93	0.332872	0.648715	1.41108	1.21978
3292.64	0.332075	0.645963	1.40127	1.20849
3294.35	0.335433	0.657563	1.42089	1.22133
3296.07	0.335912	0.650709	1.40974	1.21445
3297.78	0.341164	0.645908	1.41091	1.224
3299.49	0.336652	0.657282	1.41558	1.21328
3301.2	0.33786	0.658062	1.41906	1.2176
3302.91	0.339542	0.666452	1.4192	1.2044
3304.62	0.341224	0.645006	1.41035	1.22456
3306.33	0.344656	0.667758	1.42298	1.20836
3308.04	0.342622	0.663298	1.42487	1.21852
3309.75	0.350098	0.667241	1.41539	1.19704
3311.45	0.344566	0.663293	1.41355	1.2004
3313.16	0.349602	0.680884	1.42816	1.19565
3314.87	0.351103	0.683194	1.42687	1.18989
3316.58	0.352713	0.686607	1.43092	1.19089
3318.28	0.350972	0.675355	1.42064	1.19246
3319.99	0.350761	0.684914	1.4246	1.1835
3321.69	0.354886	0.688623	1.41847	1.16775
3323.4	0.35493	0.686898	1.42227	1.1766
3325.1	0.360623	0.693325	1.43005	1.17876
3326.81	0.361578	0.682648	1.41803	1.17661
3328.51	0.36585	0.695948	1.42796	1.17122
3330.21	0.360757	0.702112	1.43463	1.17203
3331.91	0.369547	0.692133	1.43748	1.19256
3333.62	0.367698	0.710676	1.43851	1.16453
3335.32	0.369529	0.711873	1.43961	1.16438
3337.02	0.372781	0.703431	1.44223	1.18207
3338.72	0.373774	0.725854	1.45256	1.16272
3340.42	0.375059	0.712456	1.43664	1.1587
3342.12	0.376162	0.718347	1.45254	1.17471
3343.82	0.374933	0.73837	1.46375	1.16061
3345.52	0.377712	0.729251	1.45229	1.15686
3347.22	0.378342	0.738886	1.46413	1.1604
3348.92	0.380211	0.728951	1.45633	1.16381
3350.61	0.384849	0.727828	1.46277	1.17591
3352.31	0.386754	0.735903	1.46611	1.16833
3354.01	0.386619	0.742081	1.4673	1.16035
3355.7	0.387468	0.745779	1.47278	1.1632
3357.4	0.390577	0.751938	1.47978	1.16454
3359.1	0.39241	0.759321	1.48852	1.16672
3360.79	0.391656	0.76351	1.47938	1.14538
3362.49	0.394255	0.762763	1.48669	1.15829
3364.18	0.390842	0.761529	1.49337	1.17095
3365.87	0.399161	0.776853	1.49536	1.14961
3367.57	0.397279	0.777493	1.49894	1.15431
3369.26	0.398676	0.772018	1.4983	1.16206
3370.95	0.400401	0.776359	1.50411	1.1644
3372.64	0.402162	0.781756	1.51087	1.16659
3374.34	0.402102	0.78365	1.50618	1.15606
3376.03	0.404702	0.770884	1.50834	1.17992
3377.72	0.405043	0.78419	1.51001	1.16131
3379.41	0.405093	0.782595	1.51208	1.16718
3381.1	0.407439	0.786234	1.51081	1.15933
3382.79	0.409821	0.785067	1.50811	1.15688
3384.48	0.409106	0.79	1.52077	1.16923
3386.16	0.410941	0.779679	1.51449	1.1757
3387.85	0.409717	0.804361	1.52977	1.16065
3389.54	0.414723	0.788207	1.51983	1.1706
3391.23	0.41583	0.799167	1.52024	1.15371
3392.91	0.416027	0.806116	1.54546	1.18295
3394.6	0.418629	0.800366	1.52813	1.16442
3396.29	0.415182	0.801064	1.53577	1.17554
3397.97	0.419424	0.796896	1.53435	1.17993
3399.66	0.420168	0.810869	1.54112	1.16841
3401.34	0.42011	0.818181	1.54726	1.16652
3403.02	0.427013	0.807386	1.54536	1.18076
3404.71	0.422583	0.805068	1.54132	1.178
3406.39	0.425514	0.818892	1.55819	1.18288
3408.07	0.427461	0.792619	1.52377	1.16984
3409.76	0.423651	0.809882	1.54438	1.1752
3411.44	0.42589	0.820536	1.54599	1.16072
3413.12	0.432065	0.822999	1.553	1.168
3414.8	0.427308	0.822868	1.55397	1.16976
3416.48	0.429256	0.822668	1.55812	1.17673
3418.16	0.429419	0.806252	1.54971	1.18953
3419.84	0.429327	0.838081	1.56841	1.16853
3421.52	0.430546	0.817668	1.5495	1.17094
3423.2	0.427503	0.8269	1.55334	1.1623
3424.88	0.430618	0.825978	1.54437	1.14943
3426.56	0.429579	0.826211	1.55481	1.16576
3428.23	0.431419	0.811746	1.53717	1.16068
3429.91	0.428959	0.818942	1.54213	1.15709
3431.59	0.430872	0.819322	1.53626	1.1471
3433.26	0.429178	0.815493	1.53374	1.14919
3434.94	0.431347	0.820457	1.53901	1.14968
3436.61	0.431329	0.816839	1.52702	1.13629
3438.29	0.428797	0.818719	1.52641	1.1323
3439.96	0.431403	0.820561	1.53216	1.13856
3441.64	0.426358	0.80338	1.51731	1.14229
3443.31	0.42747	0.807151	1.51654	1.13502
3444.98	0.425559	0.809307	1.50893	1.1194
3446.66	0.428566	0.810487	1.51007	1.11933
3448.33	0.423157	0.799562	1.49181	1.10759
3450	0.421464	0.789052	1.49621	1.13145
3451.67	0.41908	0.807608	1.49385	1.09798
3453.34	0.421031	0.791479	1.47463	1.09304
3455.01	0.416679	0.800729	1.48007	1.08694
3456.68	0.418267	0.797963	1.47644	1.08556
3458.35	0.413988	0.781051	1.46191	1.08938
3460.02	0.416122	0.781182	1.45033	1.07064
3461.69	0.412573	0.778009	1.45052	1.07602
3463.36	0.407638	0.768943	1.44777	1.08612
3465.03	0.412798	0.771983	1.43722	1.06439
3466.69	0.404839	0.763863	1.42079	1.05109
3468.36	0.400452	0.778857	1.42918	1.04051
3470.03	0.403498	0.751477	1.40686	1.04862
3471.69	0.398747	0.750714	1.40459	1.0462
3473.36	0.395235	0.760772	1.39699	1.01795
3475.02	0.395075	0.762378	1.39329	1.00946
3476.69	0.396665	0.749082	1.38211	1.01284
3478.35	0.386303	0.743568	1.36489	0.994113
3480.02	0.382937	0.72449	1.35005	1.0009
3481.68	0.38358	0.723013	1.34007	0.987292
3483.34	0.384222	0.737621	1.34782	0.976322
3485.01	0.374845	0.721854	1.32352	0.962673
3486.67	0.377346	0.715657	1.31625	0.960945
3488.33	0.370884	0.709512	1.30332	0.950097
3489.99	0.368102	0.699992	1.28817	0.94109
3491.65	0.361895	0.709155	1.28416	0.920004
3493.31	0.365235	0.699515	1.26471	0.904319
3494.97	0.35564	0.685495	1.24607	0.896914
3496.63	0.354936	0.675487	1.23903	0.90167
3498.29	0.350916	0.686815	1.23438	0.876107
3499.95	0.353747	0.663739	1.21605	0.883704
3501.61	0.3408	0.650059	1.1924	0.867742
3503.27	0.342064	0.670321	1.20238	0.851301
3504.92	0.339065	0.645935	1.18477	0.862141
3506.58	0.337305	0.638892	1.16351	0.839381
3508.24	0.327383	0.663948	1.16944	0.808782
3509.89	0.32832	0.630267	1.14356	0.821264
3511.55	0.327398	0.622861	1.12953	0.810666
3513.2	0.319299	0.610792	1.11439	0.805749
3514.86	0.317394	0.61996	1.10911	0.782633
3516.51	0.319643	0.60794	1.08736	0.767077
3518.17	0.313694	0.592361	1.07644	0.774522
3519.82	0.308947	0.591201	1.06496	0.758008
3521.47	0.305003	0.589099	1.04528	0.729895
3523.13	0.301568	0.588806	1.04024	0.722302
3524.78	0.301085	0.576626	1.02797	0.72215
3526.43	0.292477	0.560618	1.01784	0.731559
3528.08	0.288606	0.563898	1.01058	0.714688
3529.73	0.287868	0.547988	0.99075	0.708419
3531.38	0.27988	0.55917	0.987464	0.68527
3533.03	0.281074	0.551373	0.974873	0.677601
3534.68	0.278588	0.536533	0.956716	0.672293
3536.33	0.273552	0.537864	0.948581	0.657146
3537.98	0.27092	0.538009	0.939809	0.64288
3539.63	0.268726	0.526315	0.924199	0.636615
3541.28	0.261613	0.5111	0.907794	0.63471
3542.92	0.259201	0.510991	0.897195	0.617926
3544.57	0.257153	0.502535	0.883574	0.609662
3546.22	0.255142	0.492575	0.869	0.60228
3547.86	0.247738	0.493744	0.86238	0.589818
3549.51	0.248314	0.485734	0.846057	0.576516
3551.15	0.248381	0.478132	0.839517	0.578216
3552.8	0.239848	0.464283	0.81723	0.564716
3554.44	0.237947	0.466962	0.813873	0.555057
3556.09	0.236301	0.459654	0.803279	0.549799
3557.73	0.231667	0.443876	0.782664	0.542061
3559.37	0.228491	0.452928	0.778831	0.521444
3561.02	0.224332	0.444622	0.77134	0.522748
3562.66	0.226294	0.442649	0.763531	0.513412
3564.3	0.220021	0.432099	0.747373	0.504438
3565.94	0.219579	0.440029	0.744019	0.486384
3567.58	0.214837	0.435	0.732156	0.47545
3569.22	0.211626	0.415138	0.709637	0.471198
3570.86	0.208086	0.413802	0.709944	0.473826
3572.5	0.205859	0.4148	0.699435	0.455415
3574.14	0.206001	0.402456	0.685108	0.452244
3575.78	0.197069	0.387557	0.668079	0.448835
3577.42	0.199652	0.395684	0.663775	0.428946
3579.06	0.195458	0.38235	0.645236	0.420618
3580.7	0.196402	0.380497	0.643478	0.42077
3582.33	0.183572	0.378561	0.634563	0.409603
3583.97	0.185062	0.380045	0.629068	0.398437
3585.61	0.180104	0.368846	0.618166	0.398912
3587.24	0.18123	0.365131	0.610048	0.391867
3588.88	0.180972	0.355729	0.592069	0.378144
3590.51	0.175722	0.374902	0.59954	0.35942
3592.15	0.170509	0.343872	0.576233	0.371778
3593.78	0.167883	0.346011	0.569947	0.358296
3595.41	0.166387	0.345027	0.561036	0.345615
3597.05	0.16132	0.33529	0.5499	0.343375
3598.68	0.16303	0.328212	0.540672	0.339936
3600.31	0.158802	0.327891	0.534626	0.330777
3601.95	0.157598	0.314544	0.520231	0.329099
3603.58	0.156795	0.313805	0.512993	0.318702
3605.21	0.150489	0.315794	0.51021	0.311065
3606.84	0.14648	0.309924	0.498918	0.30239
3608.47	0.14841	0.298961	0.489058	0.304154
3610.1	0.145604	0.292	0.4788	0.29888
3611.73	0.138716	0.28343	0.468384	0.295927
3613.36	0.133068	0.291863	0.468547	0.282694
3614.99	0.139553	0.274272	0.452486	0.285142
3616.61	0.134853	0.278331	0.450899	0.27611
3618.24	0.131719	0.278491	0.44144	0.26072
3619.87	0.130917	0.268762	0.430868	0.25937
3621.5	0.125962	0.258062	0.41815	0.256141
3623.12	0.123011	0.262469	0.414339	0.242992
3624.75	0.120024	0.259954	0.409256	0.238884
3626.37	0.116818	0.251431	0.396142	0.231538
3628	0.113539	0.252498	0.390742	0.221191
3629.62	0.112739	0.248482	0.388286	0.223686
3631.25	0.109861	0.242328	0.376366	0.214461
3632.87	0.107859	0.235564	0.365162	0.207357
3634.49	0.104326	0.230688	0.358572	0.204614
3636.12	0.100939	0.225893	0.348563	0.196271
3637.74	0.0956569	0.217099	0.33418	0.18733
3639.36	0.098246	0.211746	0.327989	0.185989
3640.98	0.0939484	0.21213	0.32156	0.175088
3642.61	0.0918373	0.207096	0.314814	0.172349
3644.23	0.0884875	0.19779	0.300672	0.16461
3645.85	0.0851014	0.193127	0.292972	0.159752
3647.47	0.0806223	0.188716	0.282251	0.149655
3649.09	0.078439	0.190397	0.283221	0.148518
3650.71	0.0784421	0.181956	0.26757	0.136983
3652.32	0.0738542	0.174795	0.261225	0.138288
3653.94	0.0687928	0.167754	0.24645	0.125913
3655.56	0.0690878	0.167057	0.24122	0.11866
3657.18	0.0635894	0.159295	0.231774	0.115967
3658.79	0.0615892	0.145205	0.215252	0.112075
3660.41	0.0595892	0.154577	0.215192	0.0969835
3662.03	0.0585731	0.141221	0.201454	0.0963729
3663.64	0.0562455	0.140486	0.196863	0.0902032
3665.26	0.0521325	0.134229	0.186625	0.0838341
3666.87	0.0517364	0.126644	0.177661	0.0816258
3668.49	0.0470043	0.121735	0.169571	0.0765382
3670.1	0.0466085	0.112815	0.156473	0.0698514
3671.72	0.0446824	0.112958	0.151486	0.0616454
3673.33	0.0438132	0.102431	0.140456	0.06084
3674.94	0.0397012	0.103269	0.138891	0.0569955
3676.55	0.0353707	0.10156	0.132555	0.0495917
3678.17	0.0351579	0.0942766	0.12272	0.0455086
3679.78	0.0331597	0.089384	0.114475	0.0401464
3681.39	0.0302508	0.0840909	0.109731	0.0410248
3683	0.0281437	0.0819418	0.100932	0.030384
3684.61	0.0277857	0.0766266	0.0940416	0.027864
3686.22	0.0258246	0.0760333	0.0919238	0.0254247
3687.83	0.0249568	0.0700068	0.0861481	0.0258262
3689.44	0.024235	0.0722795	0.0847473	0.0199484
3691.05	0.022493	0.0571778	0.0688724	0.0187114
3692.65	0.0219536	0.0661973	0.0739942	0.0124751
3694.26	0.0176978	0.0558723	0.0620971	0.00995963
3695.87	0.0195636	0.0575361	0.0622892	0.00760491
3697.48	0.0178223	0.0525531	0.0585849	0.0096509
3699.08	0.0180487	0.044937	0.049473	0.00725766
3700.69	0.0145587	0.052273	0.0544388	0.00346521
3702.29	0.0143117	0.0464772	0.0478731	0.00223348
3703.9	0.0135549	0.0501532	0.0469547	-0.00511747
3705.5	0.0116685	0.0487611	0.0457188	-0.00486767
3707.11	0.0112399	0.0434378	0.0421771	-0.00201712
3708.71	0.0105199	0.0345868	0.0289332	-0.00904579
3710.32	0.0103467	0.0353648	0.0319937	-0.0053937
3711.92	0.00802373	0.0396501	0.032987	-0.0106609
3713.52	0.0102921	0.0391202	0.0306407	-0.0135672
3715.12	0.01001	0.0406466	0.0314761	-0.0146729
3716.73	0.00786974	0.0286256	0.0191895	-0.0150978
3718.33	0.00558387	0.0304957	0.0185946	-0.0190419
3719.93	0.00756138	0.0269133	0.0201475	-0.0108252
3721.53	0.00465639	0.0289637	0.0170088	-0.0191278
3723.13	0.00463013	0.0234304	0.0119619	-0.0183497
3724.73	0.00536924	0.0238575	0.0128008	-0.0176907
3726.33	0.00599917	0.0204426	0.00807323	-0.019791
3727.93	0.00367781	0.0252878	0.0109812	-0.0228906
3729.53	0.00186672	0.0248636	0.00872023	-0.0258293
3731.12	0.00348096	0.019776	0.00534644	-0.0230873
3732.72	0.00258115	0.0109438	-0.00144659	-0.0198246
3734.32	0.00248311	0.0169664	0.00281576	-0.022641
3735.91	0.00183867	0.0198759	0.00509043	-0.0236568
3737.51	0.00217821	0.0209882	0.00521837	-0.0252317
3739.11	0.000185881	0.0162358	-0.000617928	-0.0269659
3740.7	0.0010723	0.0136325	-0.00120459	-0.0237393
3742.3	0.000392036	0.0132776	-0.00489238	-0.029072
3743.89	0.00306422	0.0210026	0.00247524	-0.0296438
3745.49	-0.00147813	0.0128579	-0.00542649	-0.029255
3747.08	0.00039273	0.0149475	-0.0021933	-0.0274253
3748.67	-0.00181728	0.00941123	-0.00556057	-0.0239549
3750.27	-0.00111211	0.00694115	-0.00996116	-0.0270437
3751.86	0.000540589	0.0114922	-0.00521509	-0.0267317
3753.45	-0.000502954	0.00589286	-0.00969403	-0.024939
3755.04	-0.00194715	0.0109945	-0.00669645	-0.0283055
3756.63	-0.00302681	0.0110722	-0.00894733	-0.0320312
3758.23	-0.00130061	0.00754314	-0.0108795	-0.0294762
3759.82	-0.0019427	0.0055731	-0.0117771	-0.0277604
3761.41	-0.00134575	0.00868676	-0.00989062	-0.0297238
3763	-0.00559489	0.0108168	-0.00991226	-0.0331665
3764.58	-0.00321218	0.00440226	-0.014228	-0.0298084
3766.17	-0.00133944	0.0118611	-0.00891983	-0.0332495
3767.76	-0.00183501	0.00382882	-0.0144273	-0.0292098
3769.35	-0.00335068	0.000641494	-0.0165144	-0.0274494
3770.94	-0.00373661	0.00616895	-0.0117612	-0.0286882
3772.52	-0.00233694	0.00456154	-0.0146423	-0.0307262
3774.11	-0.00297764	-0.000845436	-0.0192726	-0.0294834
3775.7	-0.00361818	0.00638672	-0.0135632	-0.0319199
3777.28	-0.00316543	0.00417246	-0.0143748	-0.0296756
3778.87	-0.00551823	0.00659221	-0.0141519	-0.0331905
3780.45	-0.0029882	0.00547348	-0.0141669	-0.0314247
3782.04	-0.00337306	0.00825455	-0.0124317	-0.0330981
3783.62	-0.00481445	0.0028756	-0.0174561	-0.0325307
3785.21	-0.00370504	0.00550252	-0.016674	-0.0354825
3786.79	-0.0044538	0.0035408	-0.0152551	-0.0300735
3788.37	-0.00410927	0.00312295	-0.0170169	-0.0322238
3789.96	-0.00412896	-0.000846805	-0.0201301	-0.0308533
3791.54	-0.000869103	0.00318696	-0.0170393	-0.032362
3793.12	-0.00220024	0.00416008	-0.0172086	-0.03419
3794.7	-0.00302111	-0.000300444	-0.0192861	-0.0303771
3796.28	-0.00486207	-0.00268132	-0.0212835	-0.0297635
3797.86	-0.00506319	0.00423681	-0.0171564	-0.0342292
3799.44	-0.00500907	0.00217849	-0.0170052	-0.030694
3801.02	-0.00389811	0.00263372	-0.0157401	-0.029398
3802.6	-0.0058842	-0.00274825	-0.0217116	-0.0303413
3804.18	-0.00309678	0.00251313	-0.0155142	-0.0288438
3805.76	-0.00227685	0.00277589	-0.0163151	-0.0305455
3807.34	-0.00550137	-0.000706382	-0.0187854	-0.0289265
3808.91	-0.00555564	0.0013766	-0.01704	-0.0294666
3810.49	-0.00550044	-0.0022506	-0.0211793	-0.030286
3812.07	-0.00329526	0.00365883	-0.0137065	-0.0277846
3813.64	-0.0065556	-0.00318797	-0.0212645	-0.0289225
3815.22	-0.0032934	0.00408325	-0.0149039	-0.0303795
3816.79	-0.00509592	0.000108364	-0.016814	-0.0270758
3818.37	-0.00223422	-0.00473389	-0.0225409	-0.0284912
3819.94	-0.00134004	0.00894529	-0.00814591	-0.0273459
3821.52	-0.00521904	-0.00397984	-0.0192797	-0.0244799
3823.09	-0.00235688	-0.00237757	-0.0180857	-0.025133
3824.67	-0.00503314	0.00085669	-0.0172091	-0.0289053
3826.24	-0.00311806	0.00152763	-0.0174454	-0.0303569
3827.81	-0.0048466	-0.00091305	-0.0156928	-0.0236477
3829.38	-0.00358711	0.00276483	-0.0153712	-0.0290177
3830.96	-0.00385784	-0.000620456	-0.0170373	-0.0262669
3832.53	-0.00463854	0.00574091	-0.0121812	-0.0286753
3834.1	-0.00203037	-0.00209133	-0.0168682	-0.023643
3835.67	-0.00310228	0.00689932	-0.00930684	-0.0259299
3837.24	-0.00326308	0.000774501	-0.0160605	-0.0269359
3838.81	-0.00353303	-0.000737569	-0.0173258	-0.0265412
3840.38	-0.00234532	-0.00404281	-0.0180339	-0.0223857
3841.95	-0.00327087	-7.35801e-05	-0.015242	-0.0242695
3843.51	-0.00386829	-0.00163532	-0.0165056	-0.0237924
3845.08	-0.0042834	0.000138829	-0.0145078	-0.0234346
3846.65	-0.00203837	0.000824652	-0.0136228	-0.0231159
3848.22	-0.00358272	0.00453527	-0.0109875	-0.0248365
3849.78	-0.00228478	6.96045e-05	-0.0132031	-0.0212363
3851.35	-0.002262	-0.00444546	-0.0180425	-0.0217553
3852.92	-0.00373302	0.00579608	-0.00872488	-0.0232335
3854.48	-0.00454802	-0.00448593	-0.0191303	-0.023431
3856.05	-0.00306726	0.00759363	-0.00519863	-0.0204676
3857.61	-0.00275237	0.00159761	-0.0123421	-0.0223035
3859.18	-0.002328	-0.00237676	-0.0129634	-0.0169385
3860.74	-0.000518855	0.000752864	-0.0100052	-0.0172129
3862.3	-0.00330072	-0.00200455	-0.0151585	-0.0210463
3863.87	-0.000470985	0.00105232	-0.0108471	-0.019039
3865.43	-8.24557e-05	0.00219401	-0.00987534	-0.019311
3866.99	-0.0027181	0.0035719	-0.00739191	-0.0175421
3868.55	-0.00221993	-0.00285522	-0.014213	-0.0181724
3870.11	-0.00128437	-0.00153586	-0.0136371	-0.019362
3871.68	-0.00486694	0.00346454	-0.00812967	-0.0185507
3873.24	-0.00323875	0.00716099	-0.0053257	-0.0199787
3874.8	-0.00226628	0.00364929	-0.00705437	-0.0171259
3876.36	-0.004318	0.00468957	-0.00655558	-0.0179922
3877.92	-0.00294442	-0.000866898	-0.010828	-0.0159378
3879.47	-0.00288244	0.00766076	-0.00221591	-0.0158027
3881.03	-0.00271099	0.0057906	-0.00497607	-0.0172267
3882.59	-0.0014827	0.000229934	-0.00932625	-0.0152899
3884.15	-0.00247696	-0.00114954	-0.00961976	-0.0135523
3885.71	-0.00223218	-0.000865479	-0.00879921	-0.012694
3887.26	-0.00206012	-0.00228099	-0.00972774	-0.0119148
3888.82	0.00011618	-0.000276708	-0.00636098	-0.00973484
3890.38	-0.00331881	0.00036238	-0.00633395	-0.0107141
3891.93	-0.00249041	-2.95346e-06	-0.00638583	-0.0102126
3893.49	-0.00191692	0.00494494	-0.00357396	-0.0136302
3895.04	0.000660793	0.00809278	0.000113313	-0.0127671
3896.6	-0.00255495	0.00412826	-0.00256126	-0.0107032
3898.15	-0.000450604	0.000282285	-0.00666677	-0.0111185
3899.7	-0.0021721	0.00104922	-0.00615892	-0.011533
3901.26	0.00175443	0.00309547	-0.00382122	-0.0110667
3902.81	-0.000877699	-0.000675484	-0.00617526	-0.00879963
3904.36	0.000717123	0.00229114	-0.00216619	-0.00713173
3905.91	-0.00195113	-0.000654438	-0.00539384	-0.00758304
3907.47	-0.00177709	0.00387568	0.000604699	-0.00523357
3909.02	-0.00240452	0.00370767	-0.00301938	-0.0107633
3910.57	0.000101835	0.00612911	0.00194645	-0.00669225
3912.12	-0.000889661	0.00132272	-0.001915	-0.00518035
3913.67	-0.000168448	0.00345658	-0.00156074	-0.00802772
3915.22	-0.00123253	0.00497899	-9.24211e-05	-0.00811425
3916.77	-0.000328812	0.00209542	-0.00267958	-0.00764001
3918.32	-0.00219421	0.000143366	-0.00295972	-0.00496493
3919.86	-0.000816497	0.0055539	0.00312322	-0.00388907
3921.41	-0.000276706	0.00488191	0.00117414	-0.00593244
3922.96	-0.0015951	-0.00269839	-0.00443278	-0.00277502
3924.51	-0.00112787	0.0075234	0.00403791	-0.00557677
3926.05	-0.00182651	-0.00119981	-0.0018859	-0.00109774
3927.6	-0.000958159	0.00054879	-0.00216238	-0.00433788
3929.14	-0.000198991	0.00300358	0.00161778	-0.00221728
3930.69	0.00114336	0.00244568	0.000785804	-0.00265581
3932.24	0.000190261	0.00162196	0.000113459	-0.0024136
3933.78	-0.00185581	0.001421	-0.000160602	-0.00253056
3935.32	0.00105381	0.00175607	0.00195186	0.000313265
3936.87	0.000429101	0.00237361	0.00112228	-0.00200213
3938.41	-0.000231879	0.00261845	0.000770518	-0.00295669
3939.95	-0.00162147	0.00721462	0.00614558	-0.00171047
3941.5	-0.000460249	0.00292876	0.000864125	-0.00330341
3943.04	-0.000574223	0.00166736	-0.000917403	-0.00413563
3944.58	-0.00189047	0.00234638	0.000642034	-0.00272695
3946.12	0.0012024	-0.000842301	0.000134231	0.00156245
3947.66	-0.000842311	0.00762894	0.00813687	0.000812691
3949.2	0.00108485	-0.000592469	0.00134735	0.00310371
3950.74	0.00137246	-0.00117629	0.000920909	0.00335552
3952.28	-0.00048961	6.03033e-05	0.00129041	0.00196816
3953.82	-0.000456762	0.00351918	0.00468268	0.00186159
3955.36	0.00037788	0.003206	0.00505341	0.00295585
3956.9	0.000301723	-0.00382846	-0.00197165	0.0029709
3958.44	0.000954467	-7.86338e-05	0.00301307	0.00494673
3959.98	0.0016438	0.00615536	0.00815746	0.00320335
3961.51	0.00211466	0.00708355	0.00837155	0.0020608
3963.05	0.00163828	0.000989667	0.00556407	0.00731904
3964.59	0.000323999	-0.00285379	0.00100753	0.00617811
3966.12	0.00024873	-0.00353855	-0.000764849	0.00443792
3967.66	0.00195909	6.89635e-05	0.0030306	0.00473862
3969.19	0.00202988	0.00146768	0.00579271	0.00692005
3970.73	0.00115345	0.00240276	0.00919171	0.0108623
3972.26	0.00231768	0.00431811	0.00917147	0.00776537
3973.8	0.00107718	-0.00519421	-0.000550914	0.00742927
3975.33	0.00238745	8.41587e-05	0.00404284	0.00633389
3976.86	0.00107438	0.0012089	0.00418353	0.00475941
3978.4	0.00132826	-0.000754847	0.00408619	0.00774566
3979.93	1.54793e-05	0.00154463	0.0068526	0.00849275
3981.46	0.000306106	-1.40495e-05	0.00508634	0.00816063
3982.99	0.00165359	0.00324471	0.00801305	0.00762934
3984.52	0.000268383	-0.00208156	0.00418022	0.0100188
3986.06	0.00103315	-0.000448979	0.00225673	0.00432914
3987.59	0.00150658	-0.000962554	0.00478761	0.00920027
3989.12	0.00103277	-0.00113242	0.0050127	0.00983218
3990.65	0.00285468	0.0045539	0.00929446	0.00758489
3992.17	0.00194392	0.00706347	0.01135	0.00685843
3993.7	-0.00067927	0.00161535	0.00624833	0.00741277
3995.23	0.00311074	-0.00633047	0.00162445	0.0127279
3996.76	0.00285631	0.00330815	0.00813555	0.00772385
3998.29	0.000889447	-0.00237387	0.0037515	0.00980059
3999.81	0.00118187	0.0030856	0.00930943	0.00995813
4001.34	0.00136515	0.00130769	0.00850551	0.0115165
4002.87	0.00340689	-0.00514884	0.00324846	0.0134357
4004.39	0.000165299	-0.00194092	0.00658135	0.0136356
4005.92	0.000786275	-0.00267053	0.00442724	0.0113564
4007.44	0.0014074	-0.00216176	0.004262	0.010278
4008.97	0.000243223	-0.00331476	0.00696051	0.0164404
4010.49	-0.000264943	-0.00188733	0.00536492	0.0116036
4012.02	0.000757459	-0.00133138	0.00997341	0.0180877
4013.54	0.00236299	-0.00166467	0.00599312	0.0122525
4015.06	-0.000695357	-0.0010488	0.00726251	0.0132981
4016.59	-0.000182655	0.00394404	0.0107594	0.0109045
4018.11	0.00164197	0.000672166	0.00829204	0.0121918
4019.63	0.000150896	-0.00519928	0.00407563	0.0148399
4021.15	0.00208512	-0.00204018	0.00741526	0.0151287
4022.67	0.00234337	-0.00566643	0.00574507	0.0182584
4024.19	0.00438721	-0.00567444	0.00439361	0.0161089
4025.72	0.00242303	0.000534504	0.0103596	0.0157202
4027.24	0.00213515	-0.00514328	0.00646439	0.0185723
4028.75	0.00181098	-0.00364927	0.00821647	0.0189852
4030.27	0.00440198	-0.00157295	0.00790135	0.0151589
4031.79	0.00178253	6.65882e-05	0.01045	0.0166134
4033.31	0.00160456	-0.003795	0.00727297	0.0177087
4034.83	0.00233769	0.000825995	0.0130041	0.0194849
4036.35	0.000483859	-0.00587568	0.00648798	0.0197818
4037.86	0.000379224	-0.00525602	0.00824377	0.0215997
4039.38	0.0039185	0.00468811	0.0134995	0.0140982
4040.9	0.00140925	-0.00104778	0.00945072	0.0167976
4042.41	0.003382	0.00431921	0.0151053	0.0172578
4043.93	0.00276782	-0.00447926	0.006445	0.0174788
4045.44	0.00430362	-0.00319345	0.00979445	0.0207806
4046.96	0.00303384	-0.0042544	0.00837264	0.0202033
4048.47	0.0039505	-0.00308384	0.00925787	0.0197467
4049.99	0.00191583	-0.00303364	0.0102232	0.021211
4051.5	0.00385305	-0.00314911	0.0104734	0.0217961
4053.01	0.00415068	0.00186207	0.0147008	0.0205419
4054.53	0.00506794	0.000801501	0.0141569	0.0213687
4056.04	0.00197716	-0.00216115	0.0131364	0.0244761
4057.55	0.00293114	-0.00280541	0.0115599	0.0229844
4059.06	0.00217269	-0.00239535	0.0118131	0.0227336
4060.57	0.0025804	-0.00369206	0.0123851	0.0257235
4062.08	0.00309757	-0.00487929	0.0113671	0.0259943
4063.59	0.00376063	-0.00267814	0.012338	0.0240258
4065.1	0.00373153	-0.00548999	0.0104464	0.0254982
4066.61	0.00275519	-0.000948008	0.0130091	0.0223314
4068.12	0.00411102	-0.00737964	0.00857372	0.0255254
4069.63	0.00339004	-0.00430557	0.0108196	0.0242002
4071.14	0.00350728	-0.00260623	0.0121912	0.0236758
4072.65	0.00300523	-0.00554053	0.0116547	0.0275123
4074.15	0.00377865	-0.0010027	0.0150158	0.0256296
4075.66	0.00130924	-0.00428413	0.0123331	0.0265876
4077.17	0.00244734	-0.00152093	0.0148206	0.0261465
4078.68	0.00128999	-0.00860119	0.00689019	0.0247862
4080.18	0.00363082	-0.00496544	0.0115262	0.0263867
4081.69	0.00363978	-0.00671739	0.0115501	0.029228
4083.19	0.00426833	-0.000299245	0.0141196	0.0230702
4084.7	0.00158119	-0.00369629	0.0133494	0.0272731
4086.2	0.00126264	-0.00523668	0.0140114	0.0307969
4087.7	0.00225602	3.42938e-05	0.0153102	0.0244415
4089.21	0.00350459	-0.00835008	0.0090542	0.0278468
4090.71	0.000599407	-0.00578843	0.0128197	0.029773
4092.21	0.00465401	-0.0101414	0.00974622	0.0318201
4093.72	0.00233211	-0.00276639	0.016376	0.0306279
4095.22	0.00580399	-0.00778472	0.0117131	0.0311966
4096.72	0.0042476	-0.00515405	0.0131747	0.0293261
[truncated: 2 more rows]

## Sheet: Fig. 1e
Incubation time	Int 811/1480	S.E.
pre	1.00914	0.0145562
0	0.947413	0.0108082
15	0.828006	0.0325797
30	0.878095	0.0546015
45	0.909426	0.0681169
60	0.933971	0.042092
90	0.936826	0.0493343

## Sheet: Fig. 1f
	Raman int.
Raman shift	pre	30 min	60 min
176.08	0.0440464	0.0238292	0.0511083
178.57	0.0371701	0.0179448	0.0453396
181.06	0.0352493	0.0213094	0.0468817
183.549	0.0313364	0.00836869	0.0411933
186.038	0.0282978	0.019185	0.0437024
188.526	0.0238502	0.0141772	0.0312052
191.013	0.0212487	0.0190085	0.0371228
193.5	0.0178697	0.008746	0.0304348
195.986	0.0121099	0.00797685	0.0261867
198.472	0.00945939	0.000410377	0.0162567
200.957	0.00967519	0.00285827	0.0276997
203.441	0.00653858	-0.0065363	0.0121632
205.925	0.00272167	-0.0096102	0.0121719
208.408	0.00157675	-0.00200364	0.0114058
210.891	0.000771784	-0.0044897	0.00503776
213.373	-0.000470558	-0.00950162	0.00917122
215.854	-0.00171302	-0.0133509	-0.00226383
218.335	-0.00217827	-0.010354	0.00463314
220.816	-0.00201205	-0.0104334	-0.00606888
223.295	-0.00155445	-0.0169575	-0.00725568
225.774	-0.00274882	-0.0126977	-0.00334603
228.253	-0.00253439	-0.0195973	-0.00919596
230.731	-0.00426342	-0.0112701	-0.00937718
233.208	-0.000551185	-0.0125787	-0.00935326
235.685	-0.00291204	-0.019961	-0.0087713
238.161	-0.00158065	-0.00857503	-0.00584185
240.637	-0.00243565	-0.0162784	-0.0110481
243.111	-0.00358227	-0.0153663	-0.0087994
245.586	-0.00409741	-0.0173288	-0.00985007
248.06	-0.00257215	-0.0188716	-0.0156681
250.533	0.000507674	-0.0124441	-0.00718635
253.005	-0.00112524	-0.0179842	-0.0110402
255.477	-0.00134934	-0.0161838	-0.0126104
257.949	-6.74573e-05	-0.0150996	-0.0162984
260.42	0.000145471	-0.0116653	-0.00923687
262.89	0.00419641	-0.0149032	-0.0214001
265.359	0.00771281	-0.011973	-0.00999656
267.829	0.00709948	-0.0104367	-0.0177705
270.297	0.0100327	-0.0130765	-0.0148922
272.765	0.011071	-0.0102884	-0.0203568
275.232	0.0124978	-0.012137	-0.0163388
277.699	0.0139246	-0.0170838	-0.0219522
280.165	0.0118532	-0.0107019	-0.0202855
282.63	0.0112392	-0.0166181	-0.0267846
285.095	0.00931335	-0.0211239	-0.0299892
287.56	0.00539546	-0.0209154	-0.0327653
290.023	0.00458682	-0.0203758	-0.024523
292.487	0.00130031	-0.0197334	-0.0294733
294.949	0.00102589	-0.0153635	-0.0242153
297.411	-0.00133774	-0.0189644	-0.0267503
299.872	-0.000640692	-0.0246084	-0.0332819
302.333	-0.00373328	-0.0183381	-0.0265611
304.793	-0.00468829	-0.0143523	-0.0206244
307.253	-0.000153427	-0.0122897	-0.0217428
309.712	0.000931885	-0.011561	-0.0213343
312.171	0.00162843	-0.00856861	-0.0152816
314.628	0.0025192	-0.0088243	-0.0161446
317.086	0.00433298	-0.0116887	-0.02255
319.542	0.00201702	-0.0129636	-0.0164756
321.998	0.00154716	-0.0192811	-0.0241528
324.454	-0.00300384	-0.0140232	-0.0195956
326.909	-0.00279372	-0.00779513	-0.016688
329.363	-0.00306954	-0.00363513	-0.0152741
331.817	-0.00339404	-0.00654899	-0.0138365
334.27	-0.00954868	-0.00772405	-0.0139491
336.723	-0.00890169	-0.00457988	-0.0130951
339.175	-0.0115585	-0.0123591	-0.0193859
341.626	-0.0108631	-0.00496638	-0.0131282
344.077	-0.017261	-0.00596459	-0.018797
346.527	-0.014331	-0.00786883	-0.0110598
348.977	-0.0117897	-0.00730118	-0.0131239
351.426	-0.0127951	-0.00186414	-0.0143302
353.874	-0.0122459	0.00210593	-0.00733937
356.322	-0.0113082	-0.00349565	-0.00500714
358.769	-0.00910732	0.00120339	-0.00644204
361.216	-0.00821832	0.00598654	-0.0115733
363.662	-0.00737799	0.00247756	-0.00877756
366.108	-0.00959853	0.00052517	-0.00948199
368.552	-0.00836971	-0.00131908	-0.00847545
370.997	-0.0061693	-0.00147639	-0.00926243
373.441	-0.00586374	0.00177476	-0.00559409
375.884	-0.00400358	0.00322782	-0.00865002
378.326	-0.00374677	0.00286188	5.52881e-05
380.768	-0.00149812	0.00213863	0.00175274
383.21	0.00371407	0.0034062	0.00424696
385.651	0.00469938	0.00191426	-0.00163052
388.091	0.00626762	0.0144267	0.0143197
390.53	0.0127427	0.0128351	0.0119192
392.97	0.0139707	0.014959	0.0155766
395.408	0.0157331	0.0199127	0.0216782
397.846	0.0185641	0.0199524	0.0211758
400.283	0.0225126	0.029901	0.0330329
402.72	0.0289387	0.0269619	0.0342657
405.156	0.0308951	0.0261245	0.032745
407.592	0.0335315	0.0281217	0.0381593
410.027	0.0395202	0.0324982	0.0377455
412.461	0.0398244	0.0290772	0.0393781
414.895	0.0392055	0.0352532	0.0462298
417.328	0.0438336	0.037978	0.0488795
419.761	0.0459352	0.0411743	0.053853
422.193	0.0462392	0.0486305	0.0550591
424.624	0.0495067	0.0448943	0.0461396
427.055	0.050928	0.0473001	0.0523474
429.486	0.0506973	0.0530177	0.0514974
431.915	0.05275	0.0438604	0.0550033
434.344	0.0510131	0.0463656	0.0573375
436.773	0.048353	0.0511483	0.0623546
439.201	0.0448669	0.05204	0.0605646
441.628	0.0446359	0.0479302	0.0556431
444.055	0.0416841	0.0483381	0.0521116
446.481	0.0396067	0.0481548	0.0566111
448.907	0.0373836	0.0532215	0.0518723
451.332	0.0356948	0.0479572	0.0461122
453.757	0.0322569	0.0494263	0.0549989
456.18	0.0325113	0.0436649	0.0504895
458.604	0.0290246	0.0485837	0.0540446
461.026	0.0306393	0.0463966	0.0532366
463.449	0.0279299	0.0488363	0.0550547
465.87	0.0280382	0.0407583	0.0449865
468.291	0.0267862	0.0447779	0.051402
470.712	0.0259714	0.0506039	0.0607555
473.131	0.0260796	0.0395268	0.0514889
475.551	0.027208	0.0512377	0.0536787
477.969	0.0251784	0.0512057	0.0626024
480.387	0.0274727	0.0485906	0.0580797
482.805	0.0270948	0.0504697	0.0596083
485.222	0.0275913	0.0483533	0.0521768
487.638	0.0304199	0.0409172	0.0570779
490.054	0.0290215	0.040598	0.0571104
492.469	0.0303924	0.0467304	0.0557842
494.884	0.0349698	0.0548672	0.0556943
497.298	0.0430451	0.0517583	0.0632386
499.711	0.0431041	0.0501757	0.0605772
502.124	0.0499162	0.0549361	0.0642481
504.536	0.0526471	0.0550134	0.0639618
506.948	0.0476532	0.0442285	0.0560792
509.359	0.0453799	0.0489257	0.0670079
511.769	0.0439811	0.0378753	0.0611653
514.179	0.0403959	0.0393477	0.0537947
516.589	0.0429323	0.0349717	0.0492818
518.997	0.0429908	0.0297424	0.0438406
521.406	0.043195	0.03309	0.0379391
523.813	0.045294	0.0337318	0.0368136
526.22	0.0455952	0.0253228	0.039933
528.627	0.0462366	0.0338796	0.041845
531.033	0.0512504	0.0250132	0.0391526
533.438	0.0494138	0.0323314	0.0444801
535.843	0.0504437	0.0300929	0.0433004
538.247	0.0505504	0.0336027	0.038978
540.65	0.0516287	0.0287536	0.036468
543.053	0.0506665	0.0328751	0.0382486
545.456	0.0528621	0.0329441	0.0362472
547.858	0.0548148	0.0333137	0.036754
550.259	0.0533666	0.0316719	0.0413187
552.66	0.0556107	0.0371131	0.0409181
555.06	0.0594095	0.0296512	0.0421244
557.459	0.0577182	0.0333658	0.0391975
559.858	0.0577273	0.0327808	0.0413048
562.256	0.058368	0.0400524	0.0468871
564.654	0.0536644	0.042796	0.0382809
567.051	0.0542079	0.0361938	0.0396984
569.448	0.0578606	0.0494852	0.0493416
571.844	0.0574322	0.0496156	0.0524184
574.24	0.0630283	0.0564526	0.060953
576.634	0.0637173	0.0664298	0.0655147
579.029	0.0676128	0.0713967	0.0703767
581.422	0.0653381	0.076002	0.074291
583.816	0.06112	0.0602238	0.0615001
586.208	0.0539869	0.0659194	0.0626831
588.6	0.0547242	0.0555957	0.0580326
590.992	0.0512348	0.0505887	0.0492814
593.382	0.0500288	0.0460145	0.0499491
595.773	0.056839	0.0532181	0.0565234
598.162	0.0576735	0.0454002	0.0604124
600.552	0.0576819	0.0421139	0.0468947
602.94	0.0519575	0.0408824	0.0487187
605.328	0.0464759	0.0332645	0.0390843
607.715	0.0386137	0.0383795	0.0451296
610.102	0.0403224	0.0372295	0.0474408
612.488	0.0374643	0.0362707	0.0471145
614.874	0.0355292	0.0361515	0.050534
617.259	0.0369463	0.0333278	0.0517673
619.644	0.0436591	0.0389642	0.0507531
622.028	0.0456106	0.0426275	0.0506898
624.411	0.048388	0.0462292	0.0642008
626.794	0.0561209	0.0486501	0.0619753
629.176	0.0609388	0.0525835	0.0522905
631.558	0.0586148	0.0506115	0.0583207
633.939	0.0572625	0.0543397	0.0595245
636.319	0.0581936	0.0424973	0.0637013
638.699	0.0499909	0.0400467	0.0633301
641.078	0.0534968	0.0323038	0.0576767
643.457	0.0525331	0.0411911	0.0723507
645.835	0.055213	0.046178	0.0639705
648.213	0.0484192	0.0385594	0.060068
650.59	0.0473096	0.0344534	0.0545251
652.966	0.0442566	0.0388984	0.0573941
655.342	0.0456733	0.0436652	0.0639745
657.718	0.0446608	0.0517386	0.0783332
660.092	0.0538023	0.0637507	0.0834371
662.466	0.0648871	0.0733487	0.0917125
664.84	0.0796643	0.0910155	0.100123
667.213	0.0918665	0.103699	0.109459
669.585	0.092943	0.110518	0.113164
671.957	0.0879465	0.099122	0.115078
674.329	0.0687635	0.0922363	0.0984473
676.699	0.0593459	0.0854603	0.0941594
679.069	0.0498796	0.0769319	0.0883777
681.439	0.0514418	0.0736755	0.0864014
683.808	0.0475141	0.0766863	0.0884006
686.176	0.050631	0.0775948	0.0929312
688.544	0.0455372	0.0735636	0.0861739
690.912	0.0448645	0.0710571	0.0817661
693.278	0.0481756	0.0629511	0.0713456
695.644	0.0446851	0.0612498	0.0727312
698.01	0.0471217	0.0516507	0.0569481
700.375	0.0461574	0.0532735	0.0648642
702.739	0.0503431	0.0495487	0.0617096
705.103	0.0554518	0.0543569	0.068678
707.466	0.0579855	0.0590996	0.0722078
709.829	0.0666408	0.0576878	0.0668862
712.191	0.0681056	0.0599775	0.0743131
714.553	0.0719511	0.0699403	0.0862032
716.914	0.0825497	0.0746629	0.0891892
719.274	0.0944115	0.0761296	0.0916933
721.634	0.102289	0.0839673	0.0955737
723.993	0.109633	0.0794052	0.100107
726.352	0.109883	0.0845206	0.0936835
728.71	0.0993962	0.0735902	0.0890871
731.068	0.0850713	0.0586192	0.069128
733.425	0.0675398	0.050072	0.0550422
735.781	0.0532148	0.0395607	0.0519346
738.137	0.0478779	0.033745	0.0487188
740.492	0.042298	0.0405952	0.0484858
742.847	0.0412364	0.0338946	0.0485764
745.201	0.0397861	0.0326118	0.04096
747.554	0.0449918	0.0384601	0.0485317
749.907	0.0492258	0.0275534	0.0394972
752.26	0.0517108	0.033336	0.0478066
754.612	0.055216	0.0312011	0.0419563
756.963	0.0555633	0.0357225	0.0445534
759.314	0.0553276	0.0429215	0.0515281
761.664	0.0593673	0.0398641	0.0514876
764.013	0.063164	0.0370521	0.0392943
766.362	0.0679324	0.0396656	0.0537096
768.711	0.0744985	0.0459912	0.0536838
771.059	0.0806758	0.0548373	0.0634764
773.406	0.102886	0.0744674	0.0820231
775.753	0.134132	0.0856078	0.0922055
778.099	0.187339	0.121327	0.123549
780.444	0.250262	0.128326	0.115242
782.789	0.287193	0.122861	0.107531
785.134	0.277678	0.108025	0.094027
787.478	0.245377	0.0920085	0.0685969
789.821	0.204088	0.0772097	0.0628057
792.164	0.168094	0.0593605	0.0404197
794.506	0.147745	0.0584508	0.0465757
796.847	0.141776	0.0487286	0.0327649
799.188	0.145184	0.048693	0.028498
801.529	0.151508	0.0465174	0.0280105
803.869	0.168956	0.0576682	0.0344747
806.208	0.188397	0.0625661	0.0298349
808.547	0.21085	0.066457	0.0420334
810.885	0.221011	0.0729112	0.0364398
813.223	0.221407	0.0751392	0.0387617
815.56	0.205479	0.0687615	0.032698
817.896	0.183284	0.0550501	0.0219804
820.232	0.163857	0.04684	0.0190931
822.567	0.145111	0.0220138	0.00126985
824.902	0.129863	0.0170766	0.00205256
827.236	0.119717	0.0104522	-0.00208094
829.57	0.105829	0.0038932	-0.00570317
831.903	0.101852	-0.00829362	-0.013253
834.236	0.0951552	-0.0101482	-0.028677
836.567	0.0914216	-0.00319095	-0.0217628
838.899	0.0927407	-0.00325648	-0.0268035
841.23	0.0920194	-0.00609939	-0.0301118
843.56	0.100578	-0.00167156	-0.035382
845.89	0.103791	-0.00447326	-0.0295182
848.219	0.105256	-0.00474371	-0.0241293
850.547	0.106527	-0.00716393	-0.027152
852.875	0.10566	0.00587295	-0.0180887
855.203	0.10076	-0.00152995	-0.020982
857.529	0.101594	0.0112896	0.000384818
859.856	0.0977632	0.0100847	0.00154662
862.181	0.0968963	0.0192828	0.0130323
864.507	0.0923369	0.0250935	0.0266824
866.831	0.0905955	0.0389567	0.0428565
869.155	0.087688	0.0335404	0.0526227
871.479	0.0829344	0.0376501	0.058146
873.802	0.0850797	0.0341055	0.0487349
876.124	0.0808605	0.0299161	0.0419065
878.446	0.0829573	0.0308832	0.0400937
880.767	0.081556	0.0224199	0.0441756
883.087	0.0799118	0.0168715	0.0332515
885.407	0.0737494	0.0186456	0.0388701
887.727	0.0743887	0.0109669	0.0390741
890.046	0.0723559	0.0154144	0.0430839
892.364	0.0681369	0.0253003	0.0492095
894.682	0.0647439	0.0165391	0.0426502
896.999	0.0600876	0.0186015	0.0402959
899.316	0.061553	0.0334644	0.0503738
901.632	0.0580628	0.0178099	0.0268683
903.948	0.0593339	0.0281175	0.053759
906.263	0.059196	0.0310198	0.0520179
908.577	0.0630907	0.0402526	0.0540404
910.891	0.0678598	0.0443986	0.0475705
913.204	0.0706857	0.032991	0.0519437
915.517	0.0704022	0.0326515	0.0488034
917.829	0.066232	0.0290897	0.0464289
920.141	0.0607501	0.0275554	0.047763
922.452	0.0516731	0.0224096	0.0416993
924.762	0.0459969	0.00892202	0.0292024
927.072	0.0392519	0.00403198	0.0269659
929.381	0.0360535	-0.00376407	0.0146817
931.69	0.0324666	0.00542726	0.0229747
933.998	0.0335922	0.00691089	0.0246832
936.306	0.0314628	0.00328258	0.0252671
938.613	0.0343861	-0.000703961	0.0259476
940.92	0.0334714	-0.00102175	0.0262347
943.226	0.0284756	0.00635141	0.0295825
945.531	0.0349942	-0.00458813	0.0166947
947.836	0.0339824	-0.00346481	0.027655
950.14	0.037003	-0.00239576	0.0305444
952.444	0.0354568	-0.000527148	0.0261353
954.747	0.0381375	0.0111314	0.0301052
957.05	0.0411096	-0.00164199	0.0357311
959.352	0.0451021	0.000400148	0.031571
961.653	0.0476371	0.00294736	0.032253
963.954	0.0548847	0.00789373	0.0415744
966.254	0.0618895	0.0116825	0.0361546
968.554	0.0674853	0.00877059	0.0432307
970.853	0.0757534	0.00616753	0.0403331
973.152	0.0843129	-1.18017e-08	0.0467092
975.45	0.0877226	-0.017341	0.0158762
977.748	0.0907923	-0.0329763	0.0206923
980.045	0.100226	-0.0284183	0.0223088
982.341	0.100381	-0.0343924	0.0202032
984.637	0.104811	-0.027415	0.0289465
986.932	0.106958	-0.0292094	0.0301512
989.227	0.110757	-0.0189001	0.0414027
991.521	0.109405	-0.0127337	0.0429413
993.815	0.105965	-0.0144516	0.0399296
996.108	0.103739	-0.0233593	0.0303623
998.401	0.0995218	-0.0272174	0.0321595
1000.69	0.0889884	-0.0126279	0.0405711
1002.98	0.0827304	0.0250963	0.067447
1005.27	0.0764238	0.0270343	0.0564338
1007.56	0.0680283	0.0210407	0.0477938
1009.85	0.0633736	0.0311333	0.047597
1012.14	0.0615369	0.0219302	0.0501673
1014.43	0.0599432	0.032925	0.0594035
1016.72	0.0619933	0.0367564	0.0515963
1019.01	0.0595737	0.0399474	0.0579844
1021.29	0.0609923	0.036131	0.0487328
1023.58	0.0621194	0.0241652	0.0383952
1025.87	0.0624207	0.0127043	0.0253801
1028.15	0.0628677	0.00831929	0.0359125
1030.44	0.0676874	0.0139767	0.0311631
1032.72	0.0671628	0.028253	0.0340616
1035	0.0667355	0.0338891	0.0332208
1037.29	0.0746647	0.0309369	0.043124
1039.57	0.0837599	0.031792	0.041238
1041.85	0.0878996	0.03286	0.0421298
1044.13	0.0905332	0.0298666	0.0428017
1046.41	0.0879684	0.0302838	0.0396495
1048.69	0.0853551	0.0303145	0.0401325
1050.97	0.0842966	0.0337935	0.0427715
1053.25	0.083238	0.0336081	0.0444859
1055.53	0.0857262	0.029687	0.0402658
1057.81	0.0822872	0.0254488	0.0399791
1060.09	0.0849697	0.0301021	0.0402052
1062.36	0.0873123	0.0338862	0.0418596
1064.64	0.0872743	0.0309251	0.0445773
1066.92	0.0904915	0.03875	0.047069
1069.19	0.0895305	0.0418701	0.0573928
1071.47	0.0961486	0.0416246	0.0552825
1073.74	0.101989	0.0466942	0.062872
1076.01	0.102778	0.0521434	0.0706366
1078.29	0.110853	0.0561159	0.0741992
1080.56	0.114751	0.0582962	0.0788825
1082.83	0.120349	0.0747612	0.0854168
1085.1	0.130806	0.0696199	0.0841727
1087.37	0.135141	0.0839296	0.0900601
1089.64	0.148075	0.0799068	0.101986
1091.91	0.155423	0.0938074	0.101858
1094.18	0.16622	0.0937648	0.102588
1096.45	0.169146	0.0884836	0.101248
1098.72	0.178485	0.0836565	0.0917414
1100.99	0.175145	0.0633234	0.0759102
1103.25	0.166168	0.049562	0.0624002
1105.52	0.149078	0.0363736	0.045254
1107.78	0.12713	0.0329937	0.0432629
1110.05	0.109603	0.0268216	0.033546
1112.31	0.0980032	0.0236746	0.0253176
1114.58	0.0918935	0.0139803	0.0205405
1116.84	0.0836947	0.0215196	0.0252412
1119.1	0.0808888	0.0206103	0.0187974
1121.37	0.0794433	0.0122153	0.0119729
1123.63	0.0829048	0.0127809	0.00933449
1125.89	0.082674	0.0140565	0.00924446
1128.15	0.0843866	0.0205508	0.0102283
1130.41	0.086245	0.00748333	-0.0139241
1132.67	0.0913586	0.00945862	-0.0149889
1134.93	0.0877272	0.00749693	-0.0115516
1137.19	0.0906547	-0.00046654	-0.0256467
1139.45	0.0881894	0.00390318	-0.0246148
1141.7	0.086453	0.00816834	-0.016627
1143.96	0.0838421	0.00162513	-0.0147893
1146.22	0.0820572	0.00315823	-0.011266
1148.47	0.0804181	0.020138	0.0110714
1150.73	0.0818884	0.0128039	0.0198914
1152.98	0.0771887	0.0265326	0.0298935
1155.24	0.0753069	0.0314892	0.034524
1157.49	0.073911	0.0318967	0.0403978
1159.74	0.0697944	0.0342749	0.0449579
1162	0.0618884	0.0303958	0.0498814
1164.25	0.0624847	0.0267921	0.0431028
1166.5	0.0619636	0.0363761	0.0529991
1168.75	0.0638717	0.0348192	0.0634833
1171	0.0685978	0.0411647	0.064088
1173.25	0.0734211	0.0495445	0.0785345
1175.5	0.0805764	0.0517047	0.0792019
1177.75	0.0877805	0.0587878	0.0872013
1180	0.0826443	0.0604199	0.0874749
1182.24	0.0840185	0.0544515	0.0703701
1184.49	0.0811659	0.0484296	0.0742748
1186.74	0.0747667	0.0437719	0.071644
1188.98	0.0706997	0.0378017	0.0562997
1191.23	0.0683332	0.037943	0.0634374
1193.47	0.0658695	0.035361	0.0657532
1195.72	0.0681672	0.0381015	0.0755972
1197.96	0.0654608	0.0478021	0.0799226
1200.2	0.0740745	0.0512653	0.0819027
1202.45	0.0745748	0.0469133	0.0926796
1204.69	0.0855692	0.0530067	0.0930359
1206.93	0.0897134	0.0515939	0.0908592
1209.17	0.0919144	0.072068	0.101291
1211.41	0.0995082	0.0735139	0.0994641
1213.65	0.108025	0.0760712	0.11798
1215.89	0.118243	0.0743975	0.106059
1218.13	0.124816	0.0860618	0.111109
1220.37	0.141787	0.086915	0.128199
1222.6	0.16522	0.0948815	0.138232
1224.84	0.184085	0.0941551	0.138223
1227.08	0.206109	0.0934714	0.133037
1229.31	0.224538	0.0942865	0.134177
1231.55	0.242189	0.102226	0.131008
1233.78	0.248569	0.0966225	0.11979
1236.02	0.25388	0.0952821	0.122768
1238.25	0.247969	0.084713	0.104079
1240.48	0.24541	0.0861325	0.103629
1242.72	0.240567	0.0818652	0.0915781
1244.95	0.241749	0.0846329	0.0954828
1247.18	0.242834	0.0805102	0.0983639
1249.41	0.239789	0.0749056	0.0982057
1251.64	0.234558	0.0776015	0.0914935
1253.87	0.223351	0.07507	0.0896004
1256.1	0.216663	0.076455	0.0989554
1258.33	0.20021	0.0728056	0.0948976
1260.56	0.190947	0.0649414	0.0892895
1262.78	0.178866	0.0601755	0.0790094
1265.01	0.163822	0.0569077	0.0793299
1267.24	0.150332	0.038679	0.0629239
1269.46	0.144227	0.0374776	0.0438903
1271.69	0.1389	0.0325514	0.0362673
1273.91	0.13882	0.0355247	0.0381106
1276.14	0.1418	0.0122394	0.00690619
1278.36	0.149688	0.0229473	0.00727724
1280.59	0.153301	0.017473	-0.000397187
1282.81	0.163861	0.0140688	-0.00803357
1285.03	0.167036	0.0218908	-0.00587021
1287.25	0.179005	0.0242593	0.0094979
1289.47	0.198699	0.0565706	0.0342835
1291.69	0.205518	0.0561523	0.0408832
1293.91	0.212581	0.0603725	0.0412152
1296.13	0.224259	0.0701616	0.0554431
1298.35	0.223402	0.0757164	0.0643543
1300.57	0.227841	0.0865363	0.0772965
1302.79	0.223001	0.0912362	0.0934361
1305.01	0.224914	0.105859	0.115014
1307.22	0.221969	0.112506	0.131532
1309.44	0.223785	0.121464	0.1285
1311.65	0.230265	0.140785	0.156172
1313.87	0.231061	0.151629	0.169796
1316.08	0.235889	0.171121	0.201789
1318.3	0.232458	0.191871	0.222383
1320.51	0.232429	0.21039	0.232228
1322.72	0.227929	0.224557	0.258674
1324.94	0.221195	0.225189	0.260846
1327.15	0.221554	0.234937	0.260938
1329.36	0.21759	0.228835	0.268342
1331.57	0.225431	0.231465	0.257891
1333.78	0.237742	0.230422	0.262099
1335.99	0.248207	0.223603	0.253774
1338.2	0.247255	0.216975	0.25312
1340.41	0.237218	0.205904	0.232813
1342.62	0.21863	0.198479	0.223614
1344.82	0.187459	0.180884	0.212474
1347.03	0.170135	0.173416	0.206011
1349.24	0.157037	0.168323	0.201778
1351.44	0.153025	0.173705	0.195755
1353.65	0.157515	0.173197	0.18961
1355.85	0.159187	0.171401	0.191512
1358.06	0.163531	0.178167	0.200746
1360.26	0.169576	0.18815	0.199097
1362.46	0.173969	0.193995	0.19896
1364.67	0.178703	0.187921	0.199482
1366.87	0.175808	0.179849	0.193394
1369.07	0.181805	0.172657	0.190856
1371.27	0.18649	0.17952	0.190091
1373.47	0.187483	0.174117	0.183405
1375.67	0.191294	0.167577	0.171314
1377.87	0.186797	0.161875	0.170093
1380.07	0.183272	0.162991	0.175724
1382.27	0.18339	0.147762	0.162784
1384.46	0.176853	0.140776	0.158165
1386.66	0.176195	0.141653	0.146965
1388.86	0.168686	0.131862	0.140257
1391.05	0.167202	0.123027	0.129353
1393.25	0.163823	0.118726	0.139932
1395.44	0.15923	0.118757	0.134838
1397.64	0.153082	0.0999542	0.118333
1399.83	0.149509	0.0934413	0.121242
1402.03	0.143312	0.0968598	0.114734
1404.22	0.132452	0.100923	0.118024
1406.41	0.126645	0.0966	0.118757
1408.6	0.12487	0.0965196	0.121549
1410.79	0.119694	0.100374	0.120971
1412.98	0.117045	0.093583	0.121972
1415.17	0.114639	0.104131	0.120774
1417.36	0.113448	0.0950762	0.1116
1419.55	0.111042	0.0914829	0.11388
1421.74	0.108733	0.0880125	0.106964
1423.93	0.101663	0.0763264	0.0963539
1426.12	0.0983345	0.07231	0.0951941
1428.3	0.0896131	0.0649994	0.0856977
1430.49	0.0858959	0.0453168	0.0740171
1432.68	0.0820331	0.0498263	0.0705846
1434.86	0.0805996	0.039822	0.0572537
1437.05	0.0799921	0.0204771	0.0441129
1439.23	0.0831743	0.00600953	0.0390508
1441.41	0.0863079	0.00492034	0.0223768
1443.6	0.0919195	0.00387505	0.0299085
1445.78	0.0965109	0.013226	0.0183799
1447.96	0.101977	0.0128716	0.0232052
1450.14	0.109144	0.0258847	0.0218818
1452.32	0.117185	0.0328938	0.0384342
1454.5	0.127461	0.0416087	0.0462676
1456.68	0.135891	0.0543661	0.0403812
1458.86	0.145876	0.0488353	0.0470565
1461.04	0.15693	0.0597302	0.0415771
1463.22	0.162056	0.0603235	0.0391509
1465.4	0.166843	0.0592762	0.0306412
1467.57	0.174156	0.0653333	0.0329875
1469.75	0.190992	0.0876011	0.0268416
1471.93	0.218079	0.128252	0.0501151
1474.1	0.249004	0.168737	0.084845
1476.28	0.291541	0.207713	0.11685
1478.45	0.325965	0.243446	0.151428
1480.63	0.355384	0.266441	0.18006
1482.8	0.3678	0.263035	0.194877
1484.97	0.362725	0.262775	0.193324
1487.14	0.338265	0.249082	0.19106
1489.32	0.295538	0.218423	0.180441
1491.49	0.245038	0.177454	0.15336
1493.66	0.207461	0.146793	0.131849
1495.83	0.16969	0.128064	0.122037
1498	0.143919	0.107944	0.093675
1500.17	0.124222	0.0991128	0.0941378
1502.33	0.119439	0.0856279	0.0820601
1504.5	0.11077	0.0778936	0.0867227
1506.67	0.115025	0.0859014	0.0866758
1508.84	0.113887	0.0817459	0.0847115
1511	0.11134	0.081143	0.0852978
1513.17	0.104614	0.0795584	0.086539
1515.33	0.0985211	0.0769079	0.0847432
1517.5	0.0874236	0.0746851	0.0800454
1519.66	0.0891525	0.065824	0.0763046
1521.83	0.0821363	0.0675849	0.0780854
1523.99	0.0832824	0.0766557	0.0813081
1526.15	0.0846715	0.0735374	0.083713
1528.31	0.0837287	0.0713216	0.0812873
1530.48	0.0832232	0.0758937	0.0816153
1532.64	0.07956	0.0812835	0.0892347
1534.8	0.0798321	0.0753706	0.0855756
1536.96	0.0774808	0.0751078	0.0852662
1539.12	0.0735264	0.0783369	0.0787336
1541.27	0.0727787	0.073324	0.0818629
1543.43	0.06795	0.0701614	0.08309
1545.59	0.0668138	0.0793994	0.0908974
1547.75	0.0660664	0.0766181	0.0831812
1549.9	0.0644932	0.07549	0.0882686
1552.06	0.0673899	0.0688775	0.0839065
1554.22	0.0752422	0.087278	0.0976683
1556.37	0.0867384	0.0852905	0.100754
1558.53	0.094931	0.100786	0.104006
1560.68	0.110703	0.114512	0.115811
1562.83	0.131625	0.126712	0.131908
1564.99	0.153518	0.145255	0.147791
1567.14	0.187704	0.170341	0.172626
1569.29	0.21742	0.201637	0.202342
1571.44	0.248933	0.232092	0.227674
1573.59	0.272431	0.258678	0.26178
1575.74	0.276397	0.281658	0.283062
1577.89	0.273223	0.299963	0.293173
1580.04	0.241335	0.303568	0.295663
1582.19	0.211342	0.275975	0.279063
1584.34	0.181058	0.262061	0.257072
1586.49	0.150676	0.230992	0.225547
1588.63	0.130984	0.202778	0.210002
1590.78	0.122077	0.168169	0.187066
1592.93	0.114142	0.162232	0.172138
1595.07	0.107567	0.147108	0.159417
1597.22	0.105122	0.139672	0.162087
1599.36	0.106467	0.130949	0.156107
1601.5	0.104022	0.125687	0.154896
1603.65	0.103035	0.128028	0.160187
1605.79	0.0991814	0.128877	0.151457
1607.93	0.0973687	0.117991	0.150085
1610.07	0.0942443	0.113155	0.144739
1612.22	0.0955412	0.106644	0.136354
1614.36	0.0959637	0.103444	0.148877
1616.5	0.0989613	0.104613	0.14951
1618.64	0.0962747	0.118309	0.14542
1620.78	0.094317	0.107844	0.132899
1622.91	0.097655	0.11108	0.13723
1625.05	0.0975923	0.0982102	0.136389
1627.19	0.0930115	0.0958198	0.126251
1629.33	0.0903741	0.103304	0.132044
1631.46	0.0891458	0.0976419	0.134153
1633.6	0.0869946	0.090352	0.125229
1635.73	0.0879042	0.0917947	0.132807
1637.87	0.0879395	0.088126	0.132014
1640	0.0872462	0.0833542	0.126484
1642.14	0.0881076	0.0844804	0.1331
1644.27	0.0895522	0.0754635	0.118561
1646.4	0.0915314	0.0703894	0.12254
1648.53	0.0915187	0.0751668	0.124326
1650.67	0.0949071	0.0741192	0.1354
1652.8	0.097081	0.075599	0.124697
1654.93	0.0996922	0.0650712	0.125689
1657.06	0.10036	0.061427	0.13358
1659.19	0.098988	0.0661459	0.136367
1661.32	0.11015	0.0609582	0.136863
1663.44	0.109313	0.0716767	0.136292
1665.57	0.111633	0.0652784	0.135992
1667.7	0.11648	0.0734635	0.144661
1669.83	0.120307	0.081452	0.151525
1671.95	0.125057	0.0925506	0.15699
1674.08	0.127621	0.0959852	0.152879
1676.2	0.132128	0.0941084	0.146357
1678.33	0.12998	0.0884202	0.133151
1680.45	0.132593	0.0848994	0.131086
1682.58	0.137732	0.0965197	0.137426
1684.7	0.135973	0.0981255	0.134446
1686.82	0.133145	0.0950501	0.124147
1688.94	0.135127	0.100567	0.131425
1691.07	0.13055	0.0965211	0.122898
1693.19	0.128742	0.0994068	0.117896
1695.31	0.125429	0.0887408	0.0991029
1697.43	0.117792	0.0896789	0.0961101
1699.55	0.11443	0.0836469	0.0892244
1701.67	0.104461	0.0829227	0.0849787
1703.78	0.0989622	0.0686811	0.0699409
1705.9	0.0934147	0.0703539	0.0699449
1708.02	0.0882074	0.0648922	0.0618772
1710.14	0.0812027	0.0590626	0.0564591
1712.25	0.0806112	0.0623723	0.0579803
1714.37	0.0773476	0.0572143	0.0552848
1716.48	0.0718494	0.0520438	0.0475226
1718.6	0.0655254	0.0578823	0.0519489
1720.71	0.0608048	0.0620483	0.055964
1722.83	0.0587079	0.0569295	0.0519836
1724.94	0.0481575	0.0607029	0.0560607
1727.05	0.0401336	0.0603313	0.0556873
1729.16	0.0364338	0.0557622	0.0454772
1731.27	0.0291876	0.0595157	0.0483755
1733.39	0.0290347	0.044637	0.040912
1735.5	0.0249953	0.0437958	0.0369683
1737.61	0.0180895	0.0416112	0.0389498
1739.72	0.0180342	0.0310729	0.0318791
1741.82	0.0175418	0.0308951	0.0319656
1743.93	0.0144261	0.0358468	0.0329081
1746.04	0.0151	0.0290631	0.0261785
1748.15	0.0138307	0.0352099	0.0281517
1750.25	0.0106668	0.0236591	0.02614
1752.36	0.011584	0.0218001	0.0177967
1754.47	0.00880905	0.0217231	0.0110114
1756.57	0.00822049	0.0160021	0.0192675
1758.68	0.0136079	0.0148024	0.0176442
1760.78	0.00811267	0.0127918	0.0116677
1762.88	0.00281194	0.016192	0.00694644
1764.99	0.00499324	0.00772808	0.0114546
1767.09	0.00610585	0.00696691	0.00288323
1769.19	0.0033319	0.00725495	0.00695727
1771.29	0.00405614	0.00127651	0.00228358
1773.39	0.00298292	0.0106561	0.00751368
1775.49	0.00375603	0.00988482	0.00427773
1777.6	0.00394628	0.00946531	0.0058562
1779.69	0.00170749	0.00643984	0.00403863
1781.79	0.00661066	0.00874119	0.00601716
1783.89	0.00354624	0.0100651	0.00593948
1785.99	0.00227958	0.00292487	0.00777407
1788.09	0.00285924	0.00159281	0.00443286
1790.18	0.00334188	0.00437163	0.00232799
1792.28	0.00183273	0.00218074	0.00399058
1794.38	0.000955327	0.00161261	0.00247457
1796.47	0.000320988	0.00271459	0.00222315
1798.57	0.000269802	0.00756402	0.00179239
1800.66	2.44348e-05	0.000653908	0.00245599
1802.75	-0.000415125	0.00266747	0.00179152
1804.85	0.00215767	-0.00264273	0.00358757
1806.94	0.00332168	0.0024798	0.000983179
1809.03	-0.000518293	-0.00224158	-0.000569428
1811.12	-0.00183176	-0.00253146	-0.00321832
1813.21	-0.00270782	-0.00355341	-0.00228896
1815.3	-0.000134271	-0.00485931	-0.00392612
1817.39	0.00297384	-0.00236308	-0.00344053
1819.48	-0.000185199	-0.0054525	-0.00790403
1821.57	0.00151429	0.00239567	-0.00459831
1823.66	0.0036026	0.00286976	-0.00354496
1825.75	-0.00106209	-0.000623852	-0.00220086
1827.84	-0.00115975	-0.00168094	-0.00256281
1829.92	-0.00446378	-0.00754649	-0.00113321
1832.01	0.000685921	-4.823e-05	-0.00425301
1834.1	0.00107456	-0.000643728	0.000800323
1836.18	-0.00222902	0.000710567	-0.00143038
1838.27	-0.000965564	-0.00425719	0.00120053
1840.35	-0.000722217	-0.000730491	-0.00354931
1842.43	-0.000673053	-0.00588849	0.00159453
1844.52	-0.00203266	-0.000693748	-0.00291388
1846.6	-0.00368362	-0.00586527	-0.00313717
1848.68	9.78757e-06	-0.0054967	0.00383652
1850.76	1.09894e-05	-0.00261926	-0.0125903
1852.84	-0.00265977	-0.00137529	0.0069009
1854.92	-0.000520575	-0.00289918	-0.005588
1857	0.00016126	-0.00284187	-0.000606109
1859.08	0.00152343	-0.00763753	-0.00494296
1861.16	-0.00163255	-0.0054622	-0.005789
1863.24	-0.001096	-0.00225625	0.00362778
1865.32	0.000266636	-0.00126223	-0.00683009
1867.4	-0.00468647	-0.00254886	0.00392226
1869.47	-0.00463529	-0.0043585	-0.00381956
1871.55	-0.000697251	-0.00645162	-0.00124209
1873.63	-0.00326928	-0.00268262	-0.00160955
1875.7	0.00110633	-0.0026691	-0.00340176
1877.78	-0.00302008	0.00283013	-0.000958366
1879.85	-0.000781843	-0.00348283	-0.00615149
1881.92	-0.00267307	-0.0017896	-0.000138907
1884	-0.00524432	-0.00398688	-0.00362037
1886.07	-0.00256835	-0.00406857	-0.00172949
1888.14	-0.000912496	-0.00189781	-0.00274057
1890.21	-0.00314318	-0.00376115	-0.00405907
1892.29	-0.00367327	-0.00124517	-0.00410562
1894.36	-0.0018226	-0.00237123	-0.00402661
1896.43	-0.00312972	-0.00615156	-0.00257198
1898.5	-0.00322208	-0.00441459	-0.00720546
1900.57	-0.00341146	-0.00233658	-0.00231631
1902.63	-0.00306625	-9.25136e-05	-0.00277782
1904.7	-0.00179779	-0.00570409	0.000639164
1906.77	-0.00286119	0.00186442	-0.00078148
1908.84	-8.63149e-05	-0.000113349	-0.00654378
1910.9	0.0015713	-0.00169334	-0.00128031
1912.97	-0.00410709	-0.00148196	0.000989131
1915.03	-0.000117131	0.000142504	0.000550044
1917.1	-0.00229716	-0.00231028	-0.00211087
1919.16	0.000527101	0.00162971	-0.0047855
1921.23	-0.000438011	-0.000406095	0.00229661
1923.29	-0.00111146	-0.0073388	0.00120828
1925.35	-0.00377668	-0.00564362	-0.00352914
1927.42	-0.00192345	0.00180809	0.00337634
1929.48	0.000221449	-0.000691327	0.00103346
1931.54	0.000520327	0.00260874	0.000465897
1933.6	-0.00141549	-0.0024084	0.0033253
1935.66	0.00034122	-0.00410699	-0.0002458
1937.72	0.001175	0.00329311	0.00113488
1939.78	0.000308515	-0.00185338	-0.00313345
1941.84	-0.00269549	-0.00110678	-0.00507086
1943.9	-0.00166689	-0.000308034	0.00254262
1945.96	-0.000103693	-0.00209697	0.0028651
1948.01	-0.00140678	0.00181293	-5.34056e-06
1950.07	0.000302485	-0.000299073	6.91131e-05
1952.13	0.00060299	-0.00314219	-0.000647829
1954.18	-0.00147695	0.00192915	0.000159813
1956.24	0.00377943	-0.00143623	0.0024402
1958.29	-0.000777954	-0.00203667	0.00101462
1960.35	-0.00203147	-0.00451152	0.000782841
1962.4	-0.00323624	-0.00181641	-0.0042181
1964.45	-0.002206	0.00157897	0.00414904
1966.5	-0.00117559	0.00286289	-0.000475843
1968.56	-0.00194261	-0.000229444	0.00113905
1970.61	0.00214891	0.000559732	-0.00492704
1972.66	0.00147939	0.00129636	0.000864464
1974.71	3.26905e-05	-0.00385875	0.00171657
1976.76	-0.0021426	0.000982007	-0.00643128
1978.81	-0.00130553	-0.00145068	-0.00244719
1980.86	-0.000856962	-0.000297487	0.000296288
1982.91	-0.00351759	-0.00142557	-0.00107012
1984.95	-5.6499e-05	-6.79328e-05	-0.00275553
1987	-0.00164795	-0.00200202	0.00341572
1989.05	-0.000518547	-0.000728526	-0.00406939
1991.1	-0.00167241	0.00375697	0.000121681
1993.14	-0.00190301	0.00426072	-0.00534688
1995.19	-0.00300796	-0.00126165	-0.000290717
1997.23	-0.00144063	-0.00602436	-0.00435713
1999.28	-0.00142782	-0.00175513	-0.00229987
2001.32	0.000479937	0.00171705	-0.00451303
2003.36	0.00146477	-0.0039275	-0.00363233
2005.41	-0.00284587	0.00181053	-0.000432724
2007.45	-0.00404697	-0.00484284	-0.000395484
2009.49	-0.00359606	-0.00412392	-0.0040282
2011.53	-0.00304781	-0.00191224	0.0005215
2013.57	-0.000750378	0.000301578	-0.00186076
2015.61	-0.00219372	-0.00325148	0.0034314
2017.65	-0.00266523	-0.00316664	-0.00234208
2019.69	0.000215718	-0.000243237	0.000686305
2021.73	0.00047331	7.59105e-05	-0.000584395
2023.77	-0.000969356	-0.00171825	-0.000831542
2025.81	-0.0049868	-0.00315964	0.000828933
2027.84	-0.00395135	-0.00327574	0.00439241
2029.88	-0.00340158	-0.00579503	-0.00138497
2031.91	-0.00392047	-0.00401154	-0.00118447
2033.95	-0.00273877	0.00194159	-0.0036097
2035.99	-0.00354883	0.0028211	0.00156637
2038.02	0.000256748	-0.000851283	0.00258032
2040.05	0.00100171	0.00010065	0.00320213
2042.09	-0.00301436	-0.00189432	-0.00276752
2044.12	-0.00557275	-0.00394167	-0.00810132
2046.15	-0.0041471	-0.00264156	-0.00567788
2048.19	-0.00145809	0.00411303	0.00268781
2050.22	-0.0027042	-0.00631051	-0.00336893
2052.25	-0.00127803	0.000957436	-0.00506196
2054.28	-0.00475865	-0.00198916	0.00178182
2056.31	-0.00571275	-0.00434534	-0.00734675
2058.34	-0.00545207	-0.00163748	0.00120175
2060.37	-0.00324787	-0.000649826	-0.00625035
2062.39	-0.0055132	1.53087e-05	-0.0017005
2064.42	-0.00253132	0.00280896	0.00227727
2066.45	-0.00494206	-0.00508628	-0.00533289
2068.48	-0.00302867	-0.000987208	0.00115087
2070.5	-0.00427305	0.000318698	0.00151556
2072.53	-0.00464275	-0.000693083	-0.00248964
2074.55	-0.00297175	0.000106503	-0.000280975
2076.58	-0.00319536	0.000624489	-0.00339939
2078.6	-0.000600926	0.00139728	-0.000715227
2080.63	-0.00378778	-0.00534072	-0.00166622
2082.65	-0.00337928	-0.001593	-0.00166175
2084.67	-0.00433093	-0.00529436	-0.00412475
2086.7	-0.00343624	0.00430434	-0.00130519
2088.72	-0.00229844	0.00239837	-0.000397505
2090.74	-0.00456134	-0.00144139	0.00233965
2092.76	-0.000556749	0.00205208	0.000853562
2094.78	-0.00315938	0.000544281	0.00588853
2096.8	-0.00445008	0.00157269	-0.00519043
2098.82	-0.00180531	-0.00251441	0.00600866
2100.84	-0.000180626	0.00316109	0.00125711
2102.86	-0.00448298	-0.000944193	-0.000126661
2104.87	-0.0012061	-0.00261467	0.00453359
2106.89	-0.00264167	0.00117931	0.00155267
2108.91	-0.000336102	0.00287422	0.00162812
2110.92	-0.00250007	-0.00313465	-0.00256264
2112.94	-0.000145564	-0.00054701	-0.0012793
2114.96	-0.00260069	-0.00209392	-0.00182001
2116.97	-0.000391585	-0.00226463	0.00224786
2118.98	0.000165847	-0.000517102	0.00752617
2121	-0.00204582	4.64866e-05	-0.00112811
2123.01	-0.00177953	0.00425941	-0.00671443
2125.02	-0.000638559	0.00386215	-0.000346038
2127.04	0.00142568	0.00303377	0.00431631
2129.05	-0.00146544	-0.00073136	-0.00226224
2131.06	-0.00343331	0.000372056	0.00324665
2133.07	0.00149792	0.00376511	0.00209983
2135.08	0.00127944	-0.00161683	0.00566144
2137.09	-0.0018539	0.00207911	0.000483075
2139.1	-0.00182911	0.000900981	0.00113554
2141.11	-0.00243573	-0.00143156	-0.000577715
2143.11	0.000212948	0.00703022	0.00641417
2145.12	0.00111279	0.00118043	-0.00108446
2147.13	0.00181847	0.00115528	0.00484189
2149.14	0.000338057	0.00130681	0.00502251
2151.14	-0.00191951	0.00278815	-0.000329375
2153.15	0.00160457	0.00129226	0.00152962
2155.15	-0.00196439	0.00346761	0.00612386
2157.16	0.00063695	0.00288336	-0.0032621
2159.16	0.00202389	0.00366097	0.00329876
2161.16	0.000107301	0.00462462	0.0046718
2163.17	0.00314645	0.00283872	0.00156857
2165.17	0.00254199	0.00774106	0.00578073
2167.17	0.0022778	0.00150433	0.00303964
2169.17	0.00283972	0.000377853	-0.00154253
2171.17	0.00243013	0.00503257	0.00252355
2173.17	0.0057131	0.00432681	0.00926758
2175.17	0.00292328	0.000246796	0.00322774
2177.17	0.00231991	0.00474299	0.00315842
2179.17	-0.00173273	0.00241509	0.00512166
2181.17	0.00339715	0.00734573	0.00737606
2183.17	0.000219387	0.00626542	0.00505939
2185.17	-0.000626179	0.00155429	0.00182362
2187.16	0.0049415	0.00578499	0.00547996
2189.16	0.000744028	0.000353807	0.00424641
2191.16	0.00276545	0.00286069	0.00965
2193.15	0.00449556	0.00458503	-0.00116714
2195.15	0.00301932	0.00402154	-0.000228034
2197.14	0.00363237	0.0026627	0.00575957
2199.13	0.00570311	0.006856	0.00608002
2201.13	0.00262416	-4.54046e-05	-0.000182135
2203.12	0.00197458	0.00659313	0.00483493
2205.11	0.00176244	0.00646682	0.00859708
2207.1	0.00203632	0.00726733	0.000669503
2209.1	0.00303913	0.00384172	-0.00280733
2211.09	0.00336197	0.00120203	0.00925097
2213.08	0.00290763	0.00137603	0.00170933
2215.07	0.00191907	0.00297079	0.00598779
2217.06	0.000639186	0.00434018	0.00925467
2219.05	0.00305186	0.00353236	0.00381216
2221.03	0.00288977	0.00376342	0.00529967
2223.02	0.00238779	0.00198196	0.00507882
2225.01	0.00455808	0.00596042	0.00678183
2227	0.00119002	0.00567184	0.00621856
2228.98	0.00326353	4.51185e-05	-0.00178971
2230.97	0.00169344	0.00299272	0.00397211
2232.95	0.00138671	0.00648964	0.00446333
2234.94	-0.0013976	0.000713769	0.000381559
2236.92	0.00130824	0.00149798	0.000740837
2238.91	0.00250816	0.00131498	0.00549903
2240.89	-0.000955764	-0.000386641	0.00431766
2242.87	0.000147364	0.00357949	0.0027136
2244.85	-0.00370487	0.00283716	0.00750755
2246.84	-0.000512258	0.00529933	0.0045118
2248.82	0.000154173	0.000637571	-0.00219688
2250.8	-0.00083105	0.00320857	-0.00429193
2252.78	-0.000358574	-0.00276386	-0.0023924
2254.76	0.00521539	0.000828331	-0.000239628
2256.74	0.00233595	0.00204328	-0.00194644
2258.72	-0.000348963	0.00162916	0.00376118
2260.7	-0.00215918	-0.00174108	-0.00416587
2262.67	0.000354751	-0.00632745	-0.00962313
2264.65	0.00121702	0.00242814	0.00690056
2266.63	-0.00321616	-0.00374125	-0.000633591
2268.6	-0.00332519	0.00160413	-0.000920839
2270.58	-0.000421846	0.000844634	-0.00267855
2272.55	0.00272462	-0.0014747	-0.00197766
2274.53	0.000138372	-0.00361504	-0.00500634
2276.5	0.000127256	-0.00258291	0.000355554
2278.48	0.000990844	0.000290123	-0.00280969
2280.45	0.00156311	-0.00385358	0.00178459
2282.42	-0.000147868	-0.00417764	-0.00176564
2284.4	-6.10632e-05	0.00220652	6.84644e-05
2286.37	-0.00211175	-0.00182539	-0.00407681
2288.34	0.00123055	-0.000765513	0.00387885
2290.31	-0.00295745	-0.000904859	-0.00143837
2292.28	0.000190894	-0.00575752	-0.00339245
2294.25	0.000181482	-0.00287226	-0.00214122
2296.22	-0.00322861	-0.00477639	0.000556829
2298.19	-0.00231456	-0.00194542	0.001461
2300.16	-0.00368375	-0.00280228	-0.00724454
2302.12	-0.00281789	-0.00244121	-0.0011404
2304.09	-0.00141743	6.22921e-06	-0.00763092
2306.06	-0.00317472	0.000901764	0.00234031
2308.02	-0.00119087	-0.000484137	-0.00390647
2309.99	-0.00192752	-0.000638345	0.000220204
2311.95	-0.00378141	-0.00218509	-0.00368388
2313.92	-0.00544077	-0.00244109	-0.00138843
2315.88	-0.00102697	-0.00115028	-0.00505846
2317.85	-0.00166569	-0.00203774	-0.00834988
2319.81	-0.00643385	-0.00634039	-0.00364075
2321.77	-0.00532317	2.29717e-05	-0.00449045
2323.74	-0.00411513	-0.000670202	-0.000338428
2325.7	-0.00198382	-0.00211689	0.000624882
2327.66	-0.00427343	-0.0102323	-0.00409559
2329.62	-0.00117006	-0.000270962	-0.00293069
2331.58	-0.0043338	-0.00195741	-0.00291663
2333.54	0.000324646	-0.00292608	-0.000241266
2335.5	-0.00735701	0.00117364	0.00134749
2337.46	-0.00595329	-0.00481665	0.00269732
2339.42	-0.00459797	-0.0106615	-0.000559139
2341.37	-0.00159061	0.000577773	-0.002397
2343.33	-0.00562771	-0.000553576	-0.00551108
2345.29	-0.00261997	-0.00506432	-0.00417713
2347.24	-0.00651093	0.00146552	-0.00407138
2349.2	-0.000782107	-0.0044292	-0.00505577
2351.16	0.000331447	0.0022915	0.00199179
2353.11	-0.00438486	0.00149234	-0.00372596
2355.07	-0.00501994	-0.00669216	-0.00293467
2357.02	-0.00171953	-0.00143686	-0.00277612
2358.97	-0.00454049	0.00129106	-0.00443042
2360.93	-0.00444623	-0.00124354	-0.00197447
2362.88	-0.00362302	0.00135962	-0.0025176
2364.83	-0.00153644	-0.00279286	-0.00205847
2366.78	-0.00275336	-0.00173178	0.00632349
2368.73	-0.00343566	-0.00268448	-0.00448128
2370.68	-0.00499228	-0.00384848	-0.00771805
2372.63	-0.00198184	0.00209592	-0.00135168
2374.58	-0.00533567	0.00057594	-0.00279398
2376.53	-0.00805772	-0.00376269	-0.00582242
2378.48	-0.00305475	-0.00202586	-0.00131298
2380.43	-0.00315289	-0.00265485	0.00512031
2382.37	-0.00291074	0.00250797	-0.00259178
2384.32	-0.00407733	0.00307219	-0.00198642
2386.27	-0.00422347	-0.00501923	-0.00232646
2388.21	0.000683301	-0.00216415	0.00351679
2390.16	-0.00116288	-0.00612439	0.00561617
2392.1	-0.00271735	-0.00647748	-0.00282736
2394.05	-0.0029113	-0.00411813	-0.00499129
2395.99	-0.00300787	-0.00244395	-0.00454301
2397.93	-0.00431885	-0.00336058	-0.00662838
2399.88	-0.0042207	-0.00275021	-0.000862143
2401.82	-0.00203326	-0.00130567	-0.00216483
2403.76	-0.0034894	0.00298884	-0.00264707
2405.7	-0.0020789	8.61377e-05	-0.0094612
2407.64	-0.00115405	0.00155153	-0.00576219
2409.59	-0.00416428	-0.00658105	-0.000805555
2411.52	-0.0030447	-0.000606669	0.000230404
2413.46	-0.00415977	-0.00490152	-0.00180393
2415.4	-0.00386572	-0.000999868	-0.00321168
2417.34	-0.00352289	0.000512087	0.00254468
2419.28	0.000755422	-0.00259662	-0.00122164
2421.22	-0.00526583	-0.000728024	-0.00433041
2423.15	-0.000695622	-0.000636167	0.00125628
2425.09	-0.00501605	0.00264158	0.00234308
2427.03	-0.0011742	-0.00274974	0.00524271
2428.96	-0.0029193	0.00289121	0.00570349
2430.9	-0.00437269	-6.61147e-05	0.00527343
2432.83	-0.0021821	0.00112839	0.0039266
2434.77	-0.00538412	0.000386766	-0.000806997
2436.7	-0.00343605	0.00275621	0.00732878
2438.63	-0.00420848	0.00907731	0.00459276
2440.57	-0.00493213	0.00342076	0.00253981
2442.5	-0.00113729	-0.00236067	-0.00116503
2444.43	-0.00132612	-0.000877146	0.00288734
2446.36	-0.00340952	-0.000863162	0.00216825
2448.29	-0.00384088	-6.42005e-06	0.000936298
2450.22	-0.00466071	0.00257326	0.00395661
2452.15	-0.00305114	0.00338197	0.00214816
2454.08	-0.00285032	-0.00692729	-0.0027089
2456.01	-0.00192054	-0.00292005	0.00870005
2457.94	-0.00225373	0.00219058	-0.00608804
2459.86	-0.00253815	-0.000808012	-0.00155902
2461.79	-0.00393979	0.00364272	0.00550402
2463.72	-0.00082294	-0.00288482	0.0013428
2465.64	-0.00271003	-0.000320884	0.00196775
2467.57	0.00171899	-0.000426162	0.00547417
2469.49	-0.00206247	0.00125194	-0.0028604
2471.42	-0.000936764	-0.00103248	0.00510854
2473.34	-0.00243438	-0.00247598	-0.00827626
2475.27	-0.00116252	-0.00548482	0.000905619
2477.19	-0.000959306	-0.00139028	-0.00297995
2479.11	0.00186763	0.00222405	-0.0018244
2481.04	0.00177974	-0.000590967	-0.000824155
2482.96	-0.00209749	-0.00120043	0.00274025
2484.88	0.00150739	-0.00374974	0.000271117
2486.8	-0.00130059	-0.00637629	-0.0015668
2488.72	0.000604256	0.00026368	-0.00220396
2490.64	-0.00293209	-0.0030898	-0.00114863
2492.56	0.000382091	0.000792307	0.00220435
2494.48	0.00194745	-0.00187232	0.00317264
2496.4	0.00186116	-0.00419152	0.00155543
2498.31	0.00425284	0.00285375	-0.00269678
2500.23	0.00130051	0.000162304	-0.00416465
2502.15	-0.000145525	-0.00197011	-0.00254328
2504.06	0.00200384	0.00712351	0.00245594
2505.98	0.00308456	-0.00478536	0.000687993
2507.9	0.00246506	-0.00241383	-0.00338375
2509.81	0.00169999	-0.00314325	-0.00264067
2511.72	0.00103231	-0.0002463	-0.00173916
2513.64	0.00284259	-0.0039389	0.00264157
2515.55	0.00455591	-0.00440797	-0.00313374
2517.47	0.00277139	0.00125933	-0.00586198
2519.38	0.00088991	-0.00363257	-0.00646282
2521.29	0.00245808	-0.00217124	-0.00333877
2523.2	0.00514388	-0.00339153	-0.00722949
2525.11	0.00243708	0.000515354	-0.0121124
2527.02	-0.000609609	0.0015136	-0.00603339
2528.93	0.00251405	0.00281402	-0.0019065
2530.84	0.00194554	-0.00428166	0.00111209
2532.75	0.000599893	0.00293008	-0.00140879
2534.66	0.00391849	-0.0020935	-0.00462244
2536.57	-0.000584699	-0.00368977	-0.0033428
2538.48	0.00113104	-0.0028406	0.00610534
2540.38	0.00386724	-0.00324788	-0.00255997
2542.29	0.00111367	0.000682304	0.000658239
2544.19	0.00244135	-0.00185877	-0.00280246
2546.1	0.00250604	-0.00570005	-0.0119261
2548.01	0.00130777	-0.0112805	-0.00946331
2549.91	0.00472515	-0.00440035	-0.0055282
2551.81	0.00148676	-0.00411405	0.00433719
2553.72	0.00509888	-0.00653202	-0.00744448
2555.62	0.00346416	0.00545325	0.00288481
2557.52	0.00353008	-0.00436351	-0.00982545
2559.43	0.00340186	-0.00270235	-0.00718938
2561.33	0.00356535	1.18961e-05	-0.00270216
2563.23	0.00518655	-0.00460058	-0.00339346
2565.13	0.00496178	-0.00694312	-0.00855874
2567.03	0.00522304	-0.000440842	-0.00639198
2568.93	0.00242373	-0.00506559	-0.00551536
2570.83	0.00161656	-0.0024265	-0.00535975
2572.73	0.00668823	-0.00118432	-0.00575683
2574.63	0.00422962	-0.00212136	-0.00456084
2576.52	0.0039089	0.000490587	-0.00725035
2578.42	0.00456006	-0.0090129	-0.00814094
2580.32	0.00530859	0.00219648	-0.00210616
2582.22	0.00576582	-0.00326023	-0.00498894
2584.11	0.00700059	-0.00426946	-0.00496432
2586.01	0.00624364	-0.0025586	-0.00700752
2587.9	0.00451521	-0.00186055	-0.00475589
2589.8	0.00565343	-0.00165785	-0.00132712
2591.69	0.00718052	-0.00359832	-0.00403872
2593.58	0.00632722	-0.000988959	-0.00128316
2595.48	0.0049397	-0.00369714	-0.00367286
2597.37	0.00705041	-0.00207459	-0.00244638
2599.26	0.00532321	-0.00505032	-0.00890785
2601.15	0.00641407	-0.00424702	0.000416531
2603.04	0.00425003	-0.00115128	-0.00468809
2604.93	0.00786766	-0.00266869	-0.00393598
2606.82	0.00677287	-0.00218049	-0.00664333
2608.71	0.0077188	-0.000554049	0.00474514
2610.6	0.00672159	0.000620187	0.00183001
2612.49	0.00815376	0.00408436	-0.00211568
2614.38	0.00574803	-0.00233083	8.17057e-05
2616.27	0.00790938	0.00708077	0.00269287
2618.15	0.00370646	-0.00248417	0.00203295
2620.04	0.00479937	0.000547552	-0.00208645
2621.93	0.00283171	0.000828926	0.00370871
2623.81	0.00591697	-0.00243393	0.00249184
2625.7	0.00701051	0.0060897	-0.00511339
2627.58	0.0055293	0.00330226	0.00219049
2629.47	0.00730342	0.00371399	0.00550018
2631.35	0.00480237	0.00293724	0.00322509
2633.23	0.00696557	0.00118658	0.00909027
2635.12	0.00820588	0.00627742	0.00829045
2637	0.00784314	0.00291512	0.00221306
2638.88	0.00874378	0.00674997	0.00901704
2640.76	0.00532066	0.00366307	0.00391385
2642.64	0.00471562	0.00142146	0.00320454
2644.52	0.00605413	0.00433888	0.011985
2646.4	0.00671267	0.00111362	0.00575495
2648.28	0.00941194	0.00211252	0.00437723
2650.16	0.00871056	0.0049664	0.0132503
2652.04	0.0101956	0.0101312	0.00073174
2653.92	0.00619097	0.00214846	-0.00126445
2655.8	0.0106401	0.00487053	-0.00279733
2657.67	0.00877352	0.00356649	-0.000945385
2659.55	0.00909342	0.0023777	0.00668512
2661.43	0.0117456	0.00613671	0.0105795
2663.3	0.0092966	0.00368539	0.00639091
2665.18	0.0125807	0.00119092	0.00755336
2667.05	0.0109581	0.00494591	0.00942288
2668.93	0.011522	0.00182903	0.0132399
2670.8	0.0155355	0.00431585	0.0125121
2672.67	0.0124074	0.00273952	0.00394001
2674.55	0.0145266	0.00182753	0.00544388
2676.42	0.0155771	0.00811628	0.00917417
2678.29	0.0155104	-0.00470388	0.00192586
2680.16	0.0125775	0.00698042	0.00713876
2682.03	0.0134829	0.00571612	0.00169923
2683.9	0.0141941	0.00209976	-0.00434061
2685.77	0.0165575	-5.22389e-05	-0.00202737
2687.64	0.0137225	-0.00648365	-0.0111535
2689.51	0.0178839	-0.00429793	-0.00287467
2691.38	0.0199078	-0.00136863	-0.00403528
2693.25	0.0219318	-0.00857718	-0.0125229
2695.11	0.0224014	-0.0056956	-0.0114615
2696.98	0.0278268	-0.00463002	-0.016219
2698.85	0.0285883	-0.00617459	-0.0212479
2700.71	0.0221596	-0.00573374	-0.0291366
2702.58	0.0268083	-0.00698179	-0.0206386
2704.44	0.0282992	0.00257616	-0.020725
2706.31	0.0290615	-0.0217083	-0.0288639
2708.17	0.0296297	-0.0104429	-0.0239202
2710.04	0.0256799	-0.00631207	-0.0229018
2711.9	0.0281433	-0.0119601	-0.0218341
2713.76	0.0273518	-0.00648045	-0.0202675
2715.62	0.0307873	-0.0107583	-0.0257157
2717.49	0.034806	-0.0123968	-0.0274714
2719.35	0.0328006	-0.00744234	-0.0188426
2721.21	0.0330788	-0.0128843	-0.0275796
2723.07	0.0341345	-0.0151721	-0.026353
2724.93	0.0347532	-0.0123231	-0.023717
2726.79	0.0327486	-0.0128623	-0.0238817
2728.65	0.0383718	-0.0137031	-0.0219898
2730.5	0.037485	-0.0136807	-0.0279824
2732.36	0.0359669	-0.0100427	-0.0131478
2734.22	0.040279	-0.00629805	-0.0276178
2736.08	0.0388098	-0.0153626	-0.0297931
2737.93	0.0399644	-0.0116461	-0.0236292
2739.79	0.0412649	-0.0174379	-0.0259929
2741.64	0.0432944	-0.00929869	-0.0294691
2743.5	0.0454699	-0.00480951	-0.0299745
2745.35	0.0448763	-0.00632327	-0.0248355
2747.21	0.0463234	-0.0185962	-0.0395504
2749.06	0.0475764	-0.00770455	-0.0295894
2750.91	0.0500442	-0.00622563	-0.0338118
2752.77	0.0587795	-0.00130109	-0.022482
2754.62	0.0551748	-0.0112749	-0.0321544
2756.47	0.0539995	-0.00684195	-0.0406047
2758.32	0.0566624	-0.0154586	-0.0347792
2760.17	0.0613176	-0.0125087	-0.0396105
2762.02	0.0599971	-0.0143851	-0.0363819
2763.87	0.0588226	-0.0113417	-0.0360414
2765.72	0.0610977	-0.0152187	-0.0451574
2767.57	0.0607982	-0.0174011	-0.0471492
2769.42	0.0612275	-0.0178737	-0.0551823
2771.27	0.0624345	-0.0151431	-0.0428675
2773.12	0.0603865	-0.0231031	-0.0428008
2774.96	0.0593104	-0.0290672	-0.0629697
2776.81	0.0611982	-0.0166133	-0.0484541
2778.65	0.0602197	-0.0360143	-0.059188
2780.5	0.0629338	-0.0232511	-0.058912
2782.35	0.0590893	-0.0275931	-0.0573428
2784.19	0.0619496	-0.0294856	-0.0691634
2786.03	0.0607776	-0.0293439	-0.0592908
2787.88	0.0630067	-0.0288218	-0.0711767
2789.72	0.0624181	-0.0296579	-0.067591
2791.56	0.064259	-0.0403936	-0.0778485
2793.41	0.065517	-0.0438105	-0.0842882
2795.25	0.0670182	-0.046079	-0.0951126
2797.09	0.0692483	-0.0402765	-0.0815567
2798.93	0.073082	-0.0472255	-0.082948
2800.77	0.0734178	-0.05003	-0.100815
2802.61	0.076183	-0.0566264	-0.103905
2804.45	0.0765678	-0.0558578	-0.10626
2806.29	0.0818598	-0.0595181	-0.113264
2808.13	0.0807389	-0.0611563	-0.121603
2809.96	0.0839908	-0.0652719	-0.131301
2811.8	0.0901579	-0.0647601	-0.130689
2813.64	0.0887462	-0.071606	-0.142001
2815.47	0.0890351	-0.0713167	-0.148543
2817.31	0.0929194	-0.0833303	-0.15037
2819.15	0.0988931	-0.0888064	-0.174565
2820.98	0.101272	-0.0867941	-0.168627
2822.82	0.101319	-0.0913433	-0.178263
2824.65	0.100102	-0.10442	-0.191018
2826.48	0.110449	-0.0996102	-0.186779
2828.32	0.108311	-0.100318	-0.192762
2830.15	0.111176	-0.100042	-0.198587
2831.98	0.116083	-0.110681	-0.204568
2833.81	0.116762	-0.108251	-0.206029
2835.64	0.124633	-0.115204	-0.221303
2837.48	0.120746	-0.113687	-0.224536
2839.31	0.12575	-0.116109	-0.221889
2841.14	0.133378	-0.119092	-0.229883
2842.97	0.133039	-0.120269	-0.227841
2844.79	0.138529	-0.119113	-0.234208
2846.62	0.143389	-0.119076	-0.236973
2848.45	0.139066	-0.127995	-0.250717
2850.28	0.144655	-0.141273	-0.25724
2852.11	0.145677	-0.129403	-0.239113
2853.93	0.15112	-0.154672	-0.255415
2855.76	0.157583	-0.151339	-0.262061
2857.58	0.157537	-0.162803	-0.281752
2859.41	0.165362	-0.166241	-0.272499
2861.23	0.168085	-0.175233	-0.297009
2863.06	0.178193	-0.188274	-0.30524
2864.88	0.178488	-0.204888	-0.322244
2866.71	0.19088	-0.218128	-0.317389
2868.53	0.192536	-0.227076	-0.335148
2870.35	0.204977	-0.248827	-0.345775
2872.17	0.219556	-0.254317	-0.36269
2873.99	0.226022	-0.264547	-0.377899
2875.81	0.236229	-0.256988	-0.37353
2877.64	0.251197	-0.251875	-0.394262
2879.46	0.26602	-0.244783	-0.381494
2881.27	0.279823	-0.246328	-0.394856
2883.09	0.287942	-0.259922	-0.419261
2884.91	0.309033	-0.231171	-0.416434
2886.73	0.318415	-0.237897	-0.42105
2888.55	0.339069	-0.208963	-0.395959
2890.37	0.348549	-0.211097	-0.406704
2892.18	0.359049	-0.216821	-0.399042
2894	0.366538	-0.214841	-0.394724
2895.81	0.372229	-0.205223	-0.390361
2897.63	0.375442	-0.186857	-0.362898
2899.44	0.372729	-0.176786	-0.339195
2901.26	0.373174	-0.179933	-0.342005
2903.07	0.36808	-0.181481	-0.334065
2904.89	0.365076	-0.206691	-0.336246
2906.7	0.371642	-0.192796	-0.325388
2908.51	0.377967	-0.213027	-0.340297
2910.32	0.37506	-0.221967	-0.357816
2912.14	0.389352	-0.219831	-0.340735
2913.95	0.401507	-0.21806	-0.330865
2915.76	0.413905	-0.196663	-0.32385
2917.57	0.429704	-0.212701	-0.32328
2919.38	0.442248	-0.207084	-0.301093
2921.19	0.453092	-0.213925	-0.303617
2922.99	0.46277	-0.193469	-0.266059
2924.8	0.47206	-0.189327	-0.242121
2926.61	0.480718	-0.12823	-0.166155
2928.42	0.482235	-0.115949	-0.150502
2930.23	0.493129	-0.0759496	-0.104075
2932.03	0.494792	-0.0533132	-0.0752598
2933.84	0.497426	-0.0312216	-0.0309745
2935.64	0.500596	0.0029265	0.0248035
2937.45	0.512413	0.0358791	0.0549248
2939.25	0.516846	0.0413755	0.0958863
2941.06	0.525846	0.057883	0.125015
2942.86	0.535284	0.135353	0.159465
2944.66	0.551766	0.174182	0.183291
2946.47	0.57714	0.209723	0.228485
2948.27	0.591145	0.2282	0.244006
2950.07	0.613895	0.241481	0.229688
2951.87	0.633974	0.290788	0.252613
2953.67	0.645065	0.288234	0.216907
2955.47	0.644301	0.285429	0.209787
2957.27	0.64174	0.26218	0.19504
2959.07	0.634564	0.251919	0.185378
2960.87	0.622773	0.236475	0.162337
2962.67	0.607581	0.226076	0.144619
2964.47	0.594915	0.224226	0.143055
2966.27	0.581278	0.221027	0.16943
2968.06	0.570022	0.204334	0.174982
2969.86	0.549147	0.225074	0.181345
2971.66	0.526279	0.246034	0.230054
2973.45	0.511915	0.230255	0.230316
2975.25	0.494732	0.235294	0.250296
2977.04	0.481145	0.253449	0.289126
2978.84	0.460125	0.256678	0.264386
2980.63	0.448287	0.264802	0.297598
2982.42	0.43062	0.247982	0.306023
2984.22	0.410961	0.251712	0.293018
2986.01	0.394848	0.248353	0.31217
2987.8	0.380534	0.239883	0.304292
2989.59	0.362478	0.263419	0.312897
2991.38	0.340682	0.248546	0.308072
2993.17	0.320781	0.245284	0.307215
2994.96	0.307051	0.258804	0.311124
2996.75	0.28545	0.247637	0.301559
2998.54	0.275946	0.23627	0.306606
3000.33	0.256678	0.228665	0.291874
3002.12	0.247758	0.227944	0.285656
3003.91	0.231356	0.2303	0.279634
3005.7	0.225449	0.205634	0.256568
3007.48	0.212594	0.210326	0.252602
3009.27	0.204938	0.190662	0.232724
3011.05	0.194659	0.191128	0.229271
3012.84	0.188412	0.190746	0.217165
3014.63	0.172983	0.185932	0.220285
3016.41	0.16732	0.184906	0.205969
3018.19	0.163358	0.181012	0.206424
3019.98	0.156237	0.172813	0.196575
3021.76	0.150089	0.173819	0.197792
3023.54	0.147487	0.155827	0.191556
3025.33	0.146441	0.139843	0.178898
3027.11	0.13937	0.15427	0.17748
3028.89	0.139247	0.154846	0.174868
3030.67	0.135723	0.143461	0.174907
3032.45	0.136961	0.14437	0.166438
3034.23	0.132611	0.138525	0.167348
3036.01	0.132829	0.138508	0.165432
3037.79	0.131784	0.148266	0.166448
3039.57	0.131468	0.144344	0.165434
3041.35	0.133095	0.146664	0.177496
3043.12	0.132051	0.138701	0.163303
3044.9	0.137808	0.150212	0.181431
3046.68	0.134432	0.150785	0.179771
3048.45	0.136158	0.149621	0.171929
3050.23	0.134288	0.155995	0.196427
3052.01	0.14267	0.149851	0.183867
3053.78	0.137837	0.157177	0.190696
3055.55	0.139855	0.166031	0.207576
3057.33	0.141436	0.159737	0.208093
3059.1	0.141608	0.162599	0.214854
3060.88	0.139788	0.164135	0.220839
3062.65	0.144187	0.167652	0.210551
3064.42	0.144312	0.171201	0.224776
3066.19	0.143367	0.185857	0.232914
3067.96	0.149322	0.201926	0.245734
3069.73	0.150661	0.201674	0.233663
3071.5	0.154187	0.20398	0.24815
3073.27	0.15198	0.205132	0.243219
3075.04	0.153903	0.214606	0.251828
3076.81	0.15947	0.21711	0.246462
3078.58	0.163871	0.21696	0.235543
3080.35	0.166718	0.233639	0.245875
3082.12	0.171946	0.219563	0.247197
3083.88	0.180866	0.242056	0.256115
3085.65	0.188134	0.230459	0.25136
3087.42	0.190204	0.235601	0.251885
3089.18	0.200728	0.242136	0.248295
3090.95	0.206589	0.244886	0.260212
3092.71	0.214635	0.248116	0.252947
3094.48	0.219767	0.253334	0.255391
3096.24	0.224657	0.264485	0.268902
3098	0.235085	0.2531	0.270285
3099.77	0.23633	0.264218	0.263817
3101.53	0.246176	0.268182	0.275943
3103.29	0.242952	0.277215	0.277831
3105.05	0.253284	0.279593	0.281219
3106.81	0.251907	0.286032	0.282688
3108.58	0.254466	0.276533	0.292859
3110.34	0.252701	0.285962	0.286362
3112.1	0.256815	0.303585	0.30189
3113.86	0.25607	0.303748	0.298469
3115.61	0.258241	0.302245	0.306443
3117.37	0.254971	0.302838	0.315491
3119.13	0.25792	0.315615	0.322896
3120.89	0.261792	0.320924	0.324459
3122.64	0.266004	0.338335	0.321176
3124.4	0.263706	0.339155	0.332385
3126.16	0.272243	0.34243	0.337408
3127.91	0.274172	0.352495	0.35631
3129.67	0.273187	0.356051	0.357269
3131.42	0.278809	0.369755	0.356107
3133.18	0.278893	0.362468	0.358817
3134.93	0.281795	0.373752	0.375442
3136.69	0.286058	0.374198	0.366651
3138.44	0.282839	0.381086	0.370237
3140.19	0.282972	0.380066	0.37616
3141.94	0.286069	0.383564	0.371551
3143.69	0.28392	0.384228	0.389159
3145.45	0.287357	0.390867	0.387028
3147.2	0.288026	0.390465	0.382021
3148.95	0.289229	0.403604	0.391211
3150.7	0.292716	0.40768	0.393937
3152.45	0.28605	0.408055	0.397802
3154.19	0.289197	0.406433	0.401493
3155.94	0.293365	0.410872	0.409339
3157.69	0.292383	0.418402	0.413746
3159.44	0.291693	0.425001	0.422621
3161.19	0.29144	0.417531	0.416319
3162.93	0.293374	0.431717	0.429361
3164.68	0.294385	0.423807	0.430358
3166.42	0.296562	0.433227	0.444518
3168.17	0.300877	0.436957	0.432249
3169.91	0.298148	0.449268	0.436431
3171.66	0.296244	0.453832	0.445715
3173.4	0.302795	0.462842	0.459453
3175.15	0.305993	0.460389	0.451075
3176.89	0.309824	0.468491	0.463315
3178.63	0.316035	0.465379	0.467903
3180.37	0.312675	0.46063	0.468588
3182.11	0.320539	0.4915	0.471854
3183.86	0.319949	0.481181	0.46723
3185.6	0.325578	0.494438	0.479587
3187.34	0.325863	0.490967	0.488433
3189.08	0.330035	0.5059	0.485755
3190.82	0.33032	0.511582	0.49628
3192.56	0.337553	0.508401	0.501622
3194.29	0.34022	0.514277	0.509164
3196.03	0.340457	0.516711	0.497806
3197.77	0.345893	0.524045	0.511989
3199.51	0.347686	0.528677	0.521639
3201.24	0.354386	0.53454	0.519444
3202.98	0.346316	0.5377	0.530757
3204.72	0.356952	0.543426	0.532744
3206.45	0.359037	0.554166	0.545677
3208.19	0.358304	0.551041	0.547758
3209.92	0.35864	0.564688	0.562301
3211.65	0.36539	0.580719	0.567865
3213.39	0.37112	0.564494	0.55656
3215.12	0.368979	0.572842	0.571916
3216.85	0.376798	0.5744	0.566464
3218.58	0.373977	0.578645	0.561861
3220.32	0.380534	0.573973	0.568306
3222.05	0.381795	0.580541	0.585764
3223.78	0.384757	0.590321	0.585577
3225.51	0.38354	0.585996	0.57506
3227.24	0.393158	0.600757	0.58942
3228.97	0.386452	0.599128	0.593761
3230.7	0.397334	0.608832	0.597545
3232.43	0.391843	0.610433	0.609043
3234.15	0.397041	0.615026	0.605748
3235.88	0.397964	0.60487	0.60381
3237.61	0.40049	0.621735	0.615605
3239.34	0.40083	0.601763	0.596808
3241.06	0.400247	0.615078	0.616416
3242.79	0.401608	0.611866	0.617662
3244.51	0.41011	0.622477	0.603331
3246.24	0.408168	0.633381	0.635254
3247.96	0.402485	0.624662	0.616956
3249.69	0.411523	0.624674	0.6096
3251.41	0.410455	0.62397	0.618677
3253.13	0.413372	0.623692	0.635155
3254.86	0.413277	0.614753	0.621337
3256.58	0.41323	0.638809	0.629069
3258.3	0.417799	0.622703	0.620867
3260.02	0.422806	0.62993	0.637823
3261.74	0.413238	0.633765	0.640598
3263.46	0.420966	0.641553	0.660341
3265.18	0.422815	0.645969	0.666324
3266.9	0.420098	0.636234	0.644236
3268.62	0.426709	0.628649	0.646076
3270.34	0.431571	0.633265	0.645493
3272.06	0.428612	0.625815	0.630097
3273.78	0.427936	0.633741	0.651969
3275.49	0.425997	0.636217	0.639119
3277.21	0.426779	0.621793	0.639449
3278.93	0.433586	0.64691	0.656216
3280.64	0.434951	0.631149	0.659505
3282.36	0.436706	0.642651	0.644687
3284.07	0.440161	0.635756	0.640137
3285.79	0.440604	0.641648	0.657023
3287.5	0.43959	0.643035	0.667489
3289.22	0.442705	0.649056	0.649026
3290.93	0.443829	0.648715	0.66258
3292.64	0.442767	0.645963	0.677363
3294.35	0.447243	0.657563	0.661611
3296.07	0.447882	0.650709	0.671866
3297.78	0.454886	0.645908	0.670762
3299.49	0.448869	0.657282	0.67933
3301.2	0.45048	0.658062	0.679086
3302.91	0.452723	0.666452	0.679318
3304.62	0.454966	0.645006	0.653258
3306.33	0.459541	0.667758	0.679555
3308.04	0.456829	0.663298	0.66878
3309.75	0.466797	0.667241	0.690176
3311.45	0.459422	0.663293	0.679773
3313.16	0.466135	0.680884	0.688841
3314.87	0.468137	0.683194	0.680698
3316.58	0.470284	0.686607	0.69095
3318.28	0.467962	0.675355	0.684872
3319.99	0.467681	0.684914	0.683681
3321.69	0.473181	0.688623	0.706094
3323.4	0.47324	0.686898	0.699793
3325.1	0.48083	0.693325	0.699722
3326.81	0.482104	0.682648	0.706162
3328.51	0.4878	0.695948	0.696459
3330.21	0.48101	0.702112	0.716277
3331.91	0.49273	0.692133	0.691417
3333.62	0.490264	0.710676	0.729481
3335.32	0.492705	0.711873	0.707199
3337.02	0.497042	0.703431	0.708185
3338.72	0.498366	0.725854	0.718799
3340.42	0.500079	0.712456	0.719241
3342.12	0.501549	0.718347	0.718611
3343.82	0.499911	0.73837	0.732593
3345.52	0.503616	0.729251	0.741014
3347.22	0.504456	0.738886	0.742117
3348.92	0.506948	0.728951	0.732065
3350.61	0.513132	0.727828	0.73813
3352.31	0.515672	0.735903	0.739818
3354.01	0.515492	0.742081	0.747011
3355.7	0.516625	0.745779	0.732285
3357.4	0.520769	0.751938	0.736303
3359.1	0.523213	0.759321	0.7523
3360.79	0.522208	0.76351	0.755831
3362.49	0.525673	0.762763	0.755047
3364.18	0.521122	0.761529	0.747197
3365.87	0.532215	0.776853	0.767551
3367.57	0.529705	0.777493	0.77123
3369.26	0.531568	0.772018	0.758975
3370.95	0.533868	0.776359	0.76667
3372.64	0.536217	0.781756	0.764773
3374.34	0.536136	0.78365	0.76081
3376.03	0.539603	0.770884	0.745725
3377.72	0.540058	0.78419	0.774528
3379.41	0.540124	0.782595	0.760508
3381.1	0.543251	0.786234	0.777834
3382.79	0.546427	0.785067	0.79587
3384.48	0.545474	0.79	0.760774
3386.16	0.547922	0.779679	0.770221
3387.85	0.546289	0.804361	0.784359
3389.54	0.552964	0.788207	0.784264
3391.23	0.55444	0.799167	0.785545
3392.91	0.554703	0.806116	0.776498
3394.6	0.558172	0.800366	0.789581
3396.29	0.553576	0.801064	0.778094
3397.97	0.559232	0.796896	0.770841
3399.66	0.560224	0.810869	0.785027
3401.34	0.560147	0.818181	0.789237
3403.02	0.56935	0.807386	0.797547
3404.71	0.563444	0.805068	0.779274
3406.39	0.567352	0.818892	0.789456
3408.07	0.569948	0.792619	0.775942
3409.76	0.564868	0.809882	0.787037
3411.44	0.567854	0.820536	0.785491
3413.12	0.576086	0.822999	0.800408
3414.8	0.569744	0.822868	0.796967
3416.48	0.572342	0.822668	0.781693
3418.16	0.572559	0.806252	0.771147
3419.84	0.572436	0.838081	0.785236
3421.52	0.574062	0.817668	0.784799
3423.2	0.570004	0.8269	0.780926
3424.88	0.574157	0.825978	0.787701
3426.56	0.572772	0.826211	0.780575
3428.23	0.575225	0.811746	0.792198
3429.91	0.571946	0.818942	0.783161
3431.59	0.574496	0.819322	0.788613
3433.26	0.572238	0.815493	0.791157
3434.94	0.575129	0.820457	0.790485
3436.61	0.575105	0.816839	0.785746
3438.29	0.57173	0.818719	0.779367
3439.96	0.575204	0.820561	0.779331
3441.64	0.568477	0.80338	0.774684
3443.31	0.56996	0.807151	0.769665
3444.98	0.567411	0.809307	0.777997
3446.66	0.571422	0.810487	0.773235
3448.33	0.564209	0.799562	0.771159
3450	0.561952	0.789052	0.743983
3451.67	0.558773	0.807608	0.781893
3453.34	0.561375	0.791479	0.765463
3455.01	0.555572	0.800729	0.770908
3456.68	0.557689	0.797963	0.762335
3458.35	0.551984	0.781051	0.762712
3460.02	0.55483	0.781182	0.753076
3461.69	0.550097	0.778009	0.744208
3463.36	0.543518	0.768943	0.721426
3465.03	0.550397	0.771983	0.733894
3466.69	0.539786	0.763863	0.729732
3468.36	0.533936	0.778857	0.740125
3470.03	0.537998	0.751477	0.726417
3471.69	0.531663	0.750714	0.713301
3473.36	0.52698	0.760772	0.735869
3475.02	0.526767	0.762378	0.72978
3476.69	0.528886	0.749082	0.715068
3478.35	0.51507	0.743568	0.703215
3480.02	0.510583	0.72449	0.698253
3481.68	0.511439	0.723013	0.701216
3483.34	0.512296	0.737621	0.69141
3485.01	0.499793	0.721854	0.670193
3486.67	0.503128	0.715657	0.678059
3488.33	0.494512	0.709512	0.670598
3489.99	0.490803	0.699992	0.649095
3491.65	0.482527	0.709155	0.660519
3493.31	0.48698	0.699515	0.654663
3494.97	0.474187	0.685495	0.647491
3496.63	0.473248	0.675487	0.643218
3498.29	0.467888	0.686815	0.663183
3499.95	0.471662	0.663739	0.628976
3501.61	0.4544	0.650059	0.624285
3503.27	0.456085	0.670321	0.626624
3504.92	0.452086	0.645935	0.599684
3506.58	0.44974	0.638892	0.610025
3508.24	0.436511	0.663948	0.617674
3509.89	0.43776	0.630267	0.593915
3511.55	0.436531	0.622861	0.581323
3513.2	0.425732	0.610792	0.574289
3514.86	0.423192	0.61996	0.584302
3516.51	0.426191	0.60794	0.583289
3518.17	0.418259	0.592361	0.569241
3519.82	0.41193	0.591201	0.563965
3521.47	0.40667	0.589099	0.561967
3523.13	0.402091	0.588806	0.565843
3524.78	0.401447	0.576626	0.558188
3526.43	0.389969	0.560618	0.518445
3528.08	0.384808	0.563898	0.533737
3529.73	0.383824	0.547988	0.52324
3531.38	0.373173	0.55917	0.526263
3533.03	0.374765	0.551373	0.517788
3534.68	0.371451	0.536533	0.511487
3536.33	0.364735	0.537864	0.507458
3537.98	0.361227	0.538009	0.504036
3539.63	0.358302	0.526315	0.489525
3541.28	0.348818	0.5111	0.479086
3542.92	0.345601	0.510991	0.485091
3544.57	0.342871	0.502535	0.476794
3546.22	0.340189	0.492575	0.465564
3547.86	0.330318	0.493744	0.463169
3549.51	0.331086	0.485734	0.460902
3551.15	0.331174	0.478132	0.460953
3552.8	0.319797	0.464283	0.444966
3554.44	0.317262	0.466962	0.438429
3556.09	0.315068	0.459654	0.438355
3557.73	0.30889	0.443876	0.432513
3559.37	0.304655	0.452928	0.428101
3561.02	0.299109	0.444622	0.428786
3562.66	0.301725	0.442649	0.406329
3564.3	0.293362	0.432099	0.397377
3565.94	0.292772	0.440029	0.42024
3567.58	0.286449	0.435	0.41209
3569.22	0.282167	0.415138	0.391885
3570.86	0.277449	0.413802	0.390199
3572.5	0.274479	0.4148	0.391274
3574.14	0.274667	0.402456	0.379992
3575.78	0.262759	0.387557	0.379665
3577.42	0.266203	0.395684	0.365581
3579.06	0.260611	0.38235	0.377028
3580.7	0.261869	0.380497	0.362208
3582.33	0.244762	0.378561	0.365536
3583.97	0.24675	0.380045	0.359519
3585.61	0.240138	0.368846	0.340718
3587.24	0.24164	0.365131	0.344649
3588.88	0.241296	0.355729	0.349103
3590.51	0.234296	0.374902	0.350941
3592.15	0.227345	0.343872	0.335259
3593.78	0.223844	0.346011	0.317537
3595.41	0.221849	0.345027	0.321542
3597.05	0.215093	0.33529	0.319109
3598.68	0.217374	0.328212	0.314176
3600.31	0.211736	0.327891	0.306752
3601.95	0.21013	0.314544	0.303861
3603.58	0.209059	0.313805	0.307026
3605.21	0.200653	0.315794	0.300758
3606.84	0.195307	0.309924	0.292876
3608.47	0.19788	0.298961	0.281715
3610.1	0.194138	0.292	0.274016
3611.73	0.184955	0.28343	0.275283
3613.36	0.177424	0.291863	0.270765
3614.99	0.186071	0.274272	0.257587
3616.61	0.179803	0.278331	0.265576
3618.24	0.175625	0.278491	0.264184
3619.87	0.174556	0.268762	0.256062
3621.5	0.167949	0.258062	0.247585
3623.12	0.164015	0.262469	0.249398
3624.75	0.160031	0.259954	0.238355
3626.37	0.155757	0.251431	0.239983
3628	0.151386	0.252498	0.22588
3629.62	0.150318	0.248482	0.222552
3631.25	0.146482	0.242328	0.226372
3632.87	0.143811	0.235564	0.219714
3634.49	0.139101	0.230688	0.214872
3636.12	0.134585	0.225893	0.211368
3637.74	0.127543	0.217099	0.201227
3639.36	0.130995	0.211746	0.200481
3640.98	0.125265	0.21213	0.199839
3642.61	0.12245	0.207096	0.197262
3644.23	0.117983	0.19779	0.182534
3645.85	0.113469	0.193127	0.178584
3647.47	0.107496	0.188716	0.184119
3649.09	0.104585	0.190397	0.172653
3650.71	0.104589	0.181956	0.168706
3652.32	0.0984723	0.174795	0.156765
3653.94	0.0917237	0.167754	0.164496
3655.56	0.0921171	0.167057	0.158992
3657.18	0.0847859	0.159295	0.142455
3658.79	0.082119	0.145205	0.144658
3660.41	0.0794523	0.154577	0.137358
3662.03	0.0780975	0.141221	0.129675
3663.64	0.074994	0.140486	0.119589
3665.26	0.06951	0.134229	0.126766
3666.87	0.0689818	0.126644	0.113579
3668.49	0.0626724	0.121735	0.10952
3670.1	0.0621446	0.112815	0.100129
3671.72	0.0595766	0.112958	0.101062
3673.33	0.0584176	0.102431	0.0985986
3674.94	0.0529349	0.103269	0.0959984
3676.55	0.047161	0.10156	0.0917181
3678.17	0.0468772	0.0942766	0.086334
3679.78	0.044213	0.089384	0.083862
3681.39	0.0403344	0.0840909	0.0742711
3683	0.0375249	0.0819418	0.0757017
3684.61	0.0370476	0.0766266	0.0755203
3686.22	0.0344328	0.0760333	0.0709453
3687.83	0.0332758	0.0700068	0.0635956
3689.44	0.0323133	0.0722795	0.063885
3691.05	0.0299907	0.0571778	0.0547041
3692.65	0.0292715	0.0661973	0.0620819
3694.26	0.023597	0.0558723	0.0468981
3695.87	0.0260848	0.0575361	0.0489796
3697.48	0.023763	0.0525531	0.0414369
3699.08	0.024065	0.044937	0.0457806
3700.69	0.0194116	0.052273	0.0414647
3702.29	0.0190823	0.0464772	0.0386141
3703.9	0.0180731	0.0501532	0.0500134
3705.5	0.0155581	0.0487611	0.0429042
3707.11	0.0149865	0.0434378	0.0321907
3708.71	0.0140266	0.0345868	0.0373296
3710.32	0.0137956	0.0353648	0.0297716
3711.92	0.0106983	0.0396501	0.0316751
3713.52	0.0137228	0.0391202	0.036845
3715.12	0.0133467	0.0406466	0.0295147
3716.73	0.010493	0.0286256	0.0248196
3718.33	0.00744517	0.0304957	0.0294654
3719.93	0.0100818	0.0269133	0.0168527
3721.53	0.00620851	0.0289637	0.0276865
3723.13	0.00617351	0.0234304	0.0241029
3724.73	0.00715898	0.0238575	0.0268464
3726.33	0.0079989	0.0204426	0.0222564
3727.93	0.00490374	0.0252878	0.0237951
3729.53	0.00248897	0.0248636	0.0186169
3731.12	0.00464129	0.019776	0.0181916
3732.72	0.00344153	0.0109438	0.012789
3734.32	0.00331082	0.0169664	0.0123075
3735.91	0.00245156	0.0198759	0.0191576
3737.51	0.00290428	0.0209882	0.0124817
3739.11	0.000247842	0.0162358	0.0122205
3740.7	0.00142973	0.0136325	0.01519
3742.3	0.000522714	0.0132776	0.0104646
3743.89	0.00408563	0.0210026	0.0170555
3745.49	-0.00197084	0.0128579	0.0141264
3747.08	0.00052364	0.0149475	0.0128944
3748.67	-0.00242304	0.00941123	-0.00124684
3750.27	-0.00148282	0.00694115	0.00551259
3751.86	0.000720786	0.0114922	0.0108681
3753.45	-0.000670606	0.00589286	0.00726849
3755.04	-0.0025962	0.0109945	0.0120714
3756.63	-0.00403575	0.0110722	0.00750335
3758.23	-0.00173415	0.00754314	0.00547117
3759.82	-0.00259027	0.0055731	0.00580739
3761.41	-0.00179434	0.00868676	0.00641808
3763	-0.00745985	0.0108168	0.00134958
3764.58	-0.00428291	0.00440226	0.00410401
3766.17	-0.00178592	0.0118611	0.00438437
3767.76	-0.00244668	0.00382882	-0.000360235
3769.35	-0.00446757	0.000641494	-0.00224237
3770.94	-0.00498215	0.00616895	0.00733148
3772.52	-0.00311593	0.00456154	0.00237495
3774.11	-0.00397019	-0.000845436	8.19993e-05
3775.7	-0.00482425	0.00638672	0.000540483
3777.28	-0.00422057	0.00417246	0.00583695
3778.87	-0.00735764	0.00659221	-0.00109951
3780.45	-0.00398427	0.00547348	0.00106567
3782.04	-0.00449742	0.00825455	0.00396149
3783.62	-0.00641927	0.0028756	0.000187638
3785.21	-0.00494006	0.00550252	0.00392992
3786.79	-0.0059384	0.0035408	0.00325469
3788.37	-0.00547902	0.00312295	0.0013249
3789.96	-0.00550529	-0.000846805	-0.000533943
3791.54	-0.0011588	0.00318696	0.00173408
3793.12	-0.00293366	0.00416008	0.00421739
3794.7	-0.00402814	-0.000300444	-0.000983072
3796.28	-0.00648277	-0.00268132	-0.000733064
3797.86	-0.00675092	0.00423681	-0.000733214
3799.44	-0.00667877	0.00217849	0.000894856
3801.02	-0.00519748	0.00263372	0.000667885
3802.6	-0.0078456	-0.00274825	0.000937478
3804.18	-0.00412904	0.00251313	0.00534321
3805.76	-0.0030358	0.00277589	0.00265407
3807.34	-0.00733516	-0.000706382	-0.00211492
3808.91	-0.00740752	0.0013766	0.000242244
3810.49	-0.00733392	-0.0022506	1.38783e-05
3812.07	-0.00439368	0.00365883	-0.00523208
3813.64	-0.0087408	-0.00318797	-0.00491887
3815.22	-0.00439121	0.00408325	0.00543929
3816.79	-0.00679456	0.000108364	0.00126202
3818.37	-0.00297896	-0.00473389	-0.00201205
3819.94	-0.00178671	0.00894529	0.00254648
3821.52	-0.00695872	-0.00397984	-0.0101341
3823.09	-0.00314251	-0.00237757	-0.00503393
3824.67	-0.00671085	0.00085669	0.00564666
3826.24	-0.00415741	0.00152763	0.00426414
3827.81	-0.00646214	-0.00091305	-0.00207949
3829.38	-0.00478281	0.00276483	0.00298837
3830.96	-0.00514378	-0.000620456	-0.0023196
3832.53	-0.00618473	0.00574091	0.00325425
3834.1	-0.00270716	-0.00209133	-0.00154774
3835.67	-0.00413638	0.00689932	0.00596208
3837.24	-0.00435078	0.000774501	-0.000375596
3838.81	-0.00471071	-0.000737569	0.00107447
3840.38	-0.00312709	-0.00404281	0.000163404
3841.95	-0.00436115	-7.35801e-05	-0.000435275
3843.51	-0.00515772	-0.00163532	0.00190628
3845.08	-0.00571119	0.000138829	-0.000122087
3846.65	-0.00271783	0.000824652	-0.00143414
3848.22	-0.00477696	0.00453527	0.00433971
3849.78	-0.00304637	6.96045e-05	-0.00159516
3851.35	-0.003016	-0.00444546	0.00407259
3852.92	-0.00497737	0.00579608	0.00217034
3854.48	-0.00606402	-0.00448593	0.00522911
3856.05	-0.00408968	0.00759363	-0.000248987
3857.61	-0.00366983	0.00159761	-0.00121718
3859.18	-0.003104	-0.00237676	0.00033389
3860.74	-0.000691806	0.000752864	-0.000107049
3862.3	-0.00440095	-0.00200455	0.00477016
3863.87	-0.00062798	0.00105232	0.00407418
3865.43	-0.000109941	0.00219401	-0.00165102
3866.99	-0.00362414	0.0035719	-0.000129753
3868.55	-0.00295991	-0.00285522	0.0061471
3870.11	-0.0017125	-0.00153586	0.000138764
3871.68	-0.00648926	0.00346454	0.00263664
3873.24	-0.00431834	0.00716099	0.00127996
3874.8	-0.00302171	0.00364929	0.00173838
3876.36	-0.00575734	0.00468957	0.00647263
3877.92	-0.00392589	-0.000866898	0.00438591
3879.47	-0.00384326	0.00766076	0.00194727
3881.03	-0.00361466	0.0057906	0.00711453
3882.59	-0.00197693	0.000229934	0.00185411
3884.15	-0.00330262	-0.00114954	0.000354155
3885.71	-0.00297624	-0.000865479	0.00176619
3887.26	-0.00274683	-0.00228099	0.00280733
3888.82	0.000154907	-0.000276708	-0.00353968
3890.38	-0.00442508	0.00036238	0.00434879
3891.93	-0.00332055	-2.95346e-06	6.31133e-05
3893.49	-0.00255589	0.00494494	0.00357486
3895.04	0.000881057	0.00809278	0.00364059
3896.6	-0.0034066	0.00412826	0.00401135
3898.15	-0.000600806	0.000282285	0.00413892
3899.7	-0.00289613	0.00104922	-0.00353993
3901.26	0.00233924	0.00309547	0.000286718
3902.81	-0.00117026	-0.000675484	0.00144271
3904.36	0.000956164	0.00229114	0.00733765
3905.91	-0.00260151	-0.000654438	-0.000491865
3907.47	-0.00236946	0.00387568	0.000489699
3909.02	-0.00320603	0.00370767	0.00245495
3910.57	0.00013578	0.00612911	7.11282e-05
3912.12	-0.00118621	0.00132272	0.00555322
3913.67	-0.000224597	0.00345658	0.00411067
3915.22	-0.00164337	0.00497899	0.000914435
3916.77	-0.000438416	0.00209542	0.000653779
3918.32	-0.00292562	0.000143366	0.00435671
3919.86	-0.00108866	0.0055539	-0.00690563
3921.41	-0.000368941	0.00488191	0.00802901
3922.96	-0.0021268	-0.00269839	-0.00333711
3924.51	-0.00150383	0.0075234	0.00598464
3926.05	-0.00243535	-0.00119981	0.00536543
3927.6	-0.00127755	0.00054879	0.00196728
3929.14	-0.000265322	0.00300358	-0.00183275
3930.69	0.00152448	0.00244568	0.00573344
3932.24	0.000253681	0.00162196	-0.000113002
3933.78	-0.00247442	0.001421	0.00351829
3935.32	0.00140507	0.00175607	0.00391869
3936.87	0.000572135	0.00237361	0.00102245
3938.41	-0.000309172	0.00261845	0.00210875
3939.95	-0.00216196	0.00721462	-0.00325719
3941.5	-0.000613665	0.00292876	0.00361284
3943.04	-0.000765631	0.00166736	0.00348238
3944.58	-0.00252062	0.00234638	0.00451008
3946.12	0.0016032	-0.000842301	-0.00187168
3947.66	-0.00112308	0.00762894	0.00299942
3949.2	0.00144647	-0.000592469	-0.00358052
3950.74	0.00182994	-0.00117629	0.00353375
3952.28	-0.000652814	6.03033e-05	0.00161978
3953.82	-0.000609016	0.00351918	0.00151396
3955.36	0.00050384	0.003206	-0.000763787
3956.9	0.000402297	-0.00382846	-0.00130419
3958.44	0.00127262	-7.86338e-05	-0.000556461
3959.98	0.00219173	0.00615536	0.00492325
3961.51	0.00281954	0.00708355	0.00783872
3963.05	0.00218438	0.000989667	0.00511481
3964.59	0.000431999	-0.00285379	-0.000929321
3966.12	0.00033164	-0.00353855	-0.00108118
3967.66	0.00261213	6.89635e-05	-0.0027503
3969.19	0.00270651	0.00146768	-0.000633072
3970.73	0.00153794	0.00240276	-0.00524936
3972.26	0.00309025	0.00431811	-1.18261e-05
3973.8	0.00143624	-0.00519421	3.55432e-05
3975.33	0.00318327	8.41587e-05	0.00199512
3976.86	0.00143251	0.0012089	-0.001656
3978.4	0.00177102	-0.000754847	-0.00353461
3979.93	2.06391e-05	0.00154463	0.00423476
3981.46	0.000408141	-1.40495e-05	0.000326386
3982.99	0.00220479	0.00324471	-0.00706319
3984.52	0.000357844	-0.00208156	0.00253821
3986.06	0.00137754	-0.000448979	0.00400979
3987.59	0.00200877	-0.000962554	-0.0023444
3989.12	0.00137702	-0.00113242	-0.000378866
3990.65	0.00380625	0.0045539	0.000535221
3992.17	0.0025919	0.00706347	0.00615033
3993.7	-0.000905693	0.00161535	-0.00129976
3995.23	0.00414765	-0.00633047	-0.00391188
3996.76	0.00380841	0.00330815	0.00173695
3998.29	0.00118593	-0.00237387	0.000271528
3999.81	0.00157583	0.0030856	-0.00363511
4001.34	0.0018202	0.00130769	0.00129063
4002.87	0.00454252	-0.00514884	0.0003882
4004.39	0.000220398	-0.00194092	-0.00238592
4005.92	0.00104837	-0.00267053	-0.00701509
4007.44	0.00187653	-0.00216176	-0.00463885
4008.97	0.000324297	-0.00331476	-0.00426934
4010.49	-0.000353258	-0.00188733	-0.000467454
4012.02	0.00100995	-0.00133138	-0.00674852
4013.54	0.00315066	-0.00166467	0.00268348
4015.06	-0.000927143	-0.0010488	-0.0014581
4016.59	-0.00024354	0.00394404	-0.000976424
4018.11	0.00218929	0.000672166	0.000100835
4019.63	0.000201194	-0.00519928	-0.00482032
4021.15	0.00278016	-0.00204018	-0.00357022
4022.67	0.00312449	-0.00566643	-0.00833748
4024.19	0.00584961	-0.00567444	0.00210458
4025.72	0.00323071	0.000534504	-0.00417015
4027.24	0.00284687	-0.00514328	-0.00706746
4028.75	0.00241464	-0.00364927	-0.00275121
4030.27	0.00586931	-0.00157295	0.000423836
4031.79	0.00237671	6.65882e-05	0.00372166
4033.31	0.00213941	-0.003795	0.00177748
4034.83	0.00311692	0.000825995	0.004662
4036.35	0.000645145	-0.00587568	0.00328298
4037.86	0.000505633	-0.00525602	-0.00142132
4039.38	0.00522466	0.00468811	0.00213995
4040.9	0.001879	-0.00104778	-0.00245303
4042.41	0.00450933	0.00431921	-0.00130964
4043.93	0.00369043	-0.00447926	-0.00290769
4045.44	0.00573816	-0.00319345	-0.00230065
4046.96	0.00404512	-0.0042544	-0.00372586
4048.47	0.00526733	-0.00308384	0.0024169
4049.99	0.00255444	-0.00303364	-0.000350587
4051.5	0.0051374	-0.00314911	-0.00309896
4053.01	0.00553425	0.00186207	-0.000110974
4054.53	0.00675726	0.000801501	0.00109973
4056.04	0.00263622	-0.00216115	-0.00618622
4057.55	0.00390819	-0.00280541	-0.00526347
4059.06	0.00289692	-0.00239535	0.00305468
4060.57	0.00344054	-0.00369206	0.00153132
4062.08	0.00413009	-0.00487929	-0.0121755
4063.59	0.00501418	-0.00267814	-0.00325179
4065.1	0.00497538	-0.00548999	-0.00482192
4066.61	0.00367359	-0.000948008	0.00216406
4068.12	0.00548136	-0.00737964	-0.00477331
4069.63	0.00452006	-0.00430557	-0.000174228
4071.14	0.00467637	-0.00260623	-0.000944842
4072.65	0.00400697	-0.00554053	-0.00644482
4074.15	0.0050382	-0.0010027	-0.00417331
4075.66	0.00174565	-0.00428413	-0.00559118
4077.17	0.00326312	-0.00152093	-0.0060989
4078.68	0.00171999	-0.00860119	-0.00808832
4080.18	0.00484109	-0.00496544	-0.00637417
4081.69	0.00485304	-0.00671739	-0.000677487
4083.19	0.0056911	-0.000299245	-0.00337295
4084.7	0.00210825	-0.00369629	-0.00176014
4086.2	0.00168351	-0.00523668	-0.00199775
4087.7	0.00300803	3.42938e-05	0.000743207
4089.21	0.00467279	-0.00835008	0.00615931
4090.71	0.00079921	-0.00578843	-0.00725888
4092.21	0.00620535	-0.0101414	-0.00693335
4093.72	0.00310948	-0.00276639	-0.000743784
4095.22	0.00773865	-0.00778472	-0.00324933
4096.72	0.00566347	-0.00515405	-0.00388985
[truncated: 2 more rows]

## Sheet: Fig. 2
	Raman int.
Raman shift	Biotin powder	Difference	ABC	Avitin
159.482	12095	2257.73	5062.3	2828.14
162.034	12209	1559.3	26646.9	25298.4
164.584	12276	2091.59	38021.4	36231.7
167.134	12295	2885.37	40539.7	37970.7
169.683	12222	1652.21	37575.7	36225.3
172.231	12143	2230.53	34295.6	32334.5
174.779	12122	2315.24	30780.6	28704.5
177.325	12122	2106.4	27554.6	25662.1
179.87	12107	2779.27	25420.2	22831.2
182.414	12064	2989.63	24193.6	21382.2
184.958	12042	4143.34	21972.1	17978.6
187.5	12008	3545.05	19523.5	16112.8
190.042	11979	3940.23	16800.2	12968
192.582	11978	2998.25	13223.8	10311.5
195.122	11973	2827.3	10527.5	7764.96
197.66	11956	2856.56	7978.94	5165.42
200.198	11955	1635.59	5289	3684.11
202.735	11953	1218.57	3690.05	2492.25
205.271	11974	1216.93	2260.06	1051.89
207.806	11979	1057.03	1456.31	402.638
210.34	11995	545.352	564.875	19.6875
212.873	12002	149.857	61.5	-89.1
215.406	12010	-230.249	-308.938	-79.35
217.937	11995	57.8394	6	-52.275
220.467	11981	-121.016	87.2344	210
222.997	11966	-224.337	1723.56	1964.27
225.526	11953	363.344	3133.12	2793.06
228.053	11953	698.909	5016.75	4354.12
230.58	11958	1568.46	7097.62	5575.63
233.106	11970	1216.45	8412.42	7256.44
235.631	11982	1689.05	10175.8	8558.1
238.155	12015	2528.09	11869.2	9419.64
240.678	12044	1311.39	12442.5	11224.6
243.2	12100	2203.33	13585.5	11477.8
245.721	12158	1825.73	14130	12407.7
248.242	12133	2328.3	14351.6	12124.3
250.761	12101	2104.73	14196.1	12192.9
253.28	12039	1672.43	13559.5	11987
255.798	11988	992.395	11980.7	11080.6
258.314	11964	794.838	11459.6	10754.3
260.83	11954	780.728	10353.9	9653.62
263.345	11944	1021.06	10575.5	9634.74
265.859	11934	532.071	9462.5	9005.47
268.372	11950	778.913	9301.27	8593.97
270.885	11953	423.725	7334.3	6968.64
273.396	11947	-197.054	5655.42	5901.66
275.906	11959	-519.891	4273.48	4833.66
278.416	11985	-485.686	2808.23	3321.6
280.925	11996	-652.225	1848.58	2521.82
283.432	12020	-1088.95	1500.92	2611.63
285.939	12120	-485.333	1790.28	2294.74
288.445	12203	-882.879	1556.84	2460.23
290.95	12298	-1115.05	1687.34	2825.94
293.455	12314	-1378.76	2220.38	3629.38
295.958	12257	-1097.46	2783.91	3913.99
298.46	12142	-1074.74	3240.91	4351.91
300.962	12056	-606.078	4413.16	5061.41
303.462	12020	-656.363	4445	5144.23
305.962	12003	-475.976	5749.84	6278.14
308.461	12001	-163.901	6453.09	6672.6
310.959	12006	187.627	6600.11	6466.37
313.456	11976	392.423	6653.81	6314.01
315.952	11938	450.438	6081.41	5678.29
318.448	11960	220.486	5076.28	4896.6
320.942	11943	-208.386	4348.03	4594.71
323.436	11943	64.6281	3856.27	3823.5
325.928	11931	-375.409	3190.59	3595.97
328.42	11941	-205.231	3378.16	3613.5
330.911	11941	110.041	3530.55	3449.25
333.401	11937	268.01	3887.86	3650.27
335.89	11935	278.242	3846.92	3598.67
338.379	11930	276.007	3822.28	3576.07
340.866	11941	560.573	3131.44	2592.47
343.353	11937	194.751	3027.45	2856.51
345.839	11926	-153.016	2122.47	2294.61
348.323	11936	-347.169	1644.89	2008.8
350.807	11945	-101.933	1762.41	1880.01
353.29	11971	-337.584	1594.34	1948.16
355.773	11981	34.9333	1656.92	1635.62
358.254	11988	198.622	1551.19	1363.93
360.735	12023	-27.3372	699.344	732.787
363.214	12077	192.172	365.094	174.375
365.693	12195	-48.0838	198.172	248.325
368.171	12310	57.2377	-360.359	-421.106
370.648	12359	111.448	-374.797	-490.331
373.124	12338	82.1072	-245.031	-329.888
375.599	12133	-406.851	-153.344	255.637
378.074	12063	-274.35	-56.375	219.806
380.547	12016	-127.68	632.953	767.025
383.02	12007	-344.218	762.203	1115.72
385.492	11986	-915.542	1136.98	2069.77
387.963	11985	-428.704	1863.42	2311.39
390.433	11984	-389.085	3295.36	3715.41
392.902	12002	-559.928	4186.31	4786.12
395.371	11990	318.614	6611.69	6345.96
397.839	12003	450.256	8190.02	7804.8
400.305	12015	23.7147	10013.3	10073.5
402.771	12026	223.012	12237.5	12115.5
405.236	12024	120.209	14638.2	14640
407.7	12021	159.874	16812.3	16792.4
410.164	12042	122.73	17477.3	17500.4
412.626	12042	-98.8103	18268	18521.1
415.088	12074	253.548	18429.4	18328.6
417.549	12103	-185.258	17946	18283.7
420.009	12099	231.565	17692.8	17608
422.468	12159	-791.19	16777.8	17716.6
424.926	12250	-552.485	17025.2	17725.4
427.384	12431	-507.63	17811.1	18472.6
429.84	12513	34.9489	18748.3	18870.6
432.296	12445	84.1933	18673.8	18745.8
434.751	12273	151.481	18425.7	18427.8
437.205	12192	-245.583	17855.2	18252.9
439.659	12162	-386.09	17328.6	17863.6
442.111	12192	-548.723	16789.4	17483.8
444.563	12241	-23.712	16872.5	17038.2
447.013	12288	-0.5575	16275.9	16413.2
449.463	12256	-301	15500.4	15934.1
451.912	12172	-344.78	14734.5	15206
454.361	12135	-394.616	14118.8	14635.4
456.808	12136	-373.284	14136.2	14631.4
459.255	12145	-271.538	14304	14698.1
461.7	12187	-40.7291	13880.7	14038.4
464.145	12236	-78.0009	13147.2	13336.4
466.59	12256	270.407	12470.2	12302.4
469.033	12217	335.296	12375.7	12141.6
471.475	12171	603.724	11936.9	11428.4
473.917	12118	1149.47	12141.8	11084.7
476.358	12096	539.995	11360.2	10911.1
478.798	12075	135.346	11429.1	11388.6
481.237	12069	-153.014	12313.9	12571.7
483.676	12065	192.492	14044.3	13968.2
486.113	12062	259.708	15437.7	15305.5
488.55	12065	514.725	15964.2	15579.3
490.986	12061	-28.7527	15328.6	15486.4
493.421	12050	-260.845	14373.7	14757.5
495.855	12059	-114.835	14439.5	14676.7
498.289	12053	221.185	14635.9	14535.8
500.721	12063	338.747	15108.6	14893.9
503.153	12053	703.309	14665.3	14079.3
505.584	12047	457.955	13380.5	13031.1
508.015	12070	474.774	12772.2	12400.8
510.444	12073	446.675	12867	12524.7
512.873	12041	776.296	12827.6	12152.6
515.3	12045	814.389	12339.3	11621.8
517.727	12045	1378.11	12461.8	11176.9
520.154	12051	888.393	12317.2	11524.8
522.579	12066	805.5	11440	10723.9
525.004	12059	1156.56	10695.9	9619.48
527.427	12064	740.885	9432.03	8764.18
529.85	12053	491.28	8510.28	8086.39
532.273	12061	110.614	8937.62	8901.19
534.694	12041	206.234	10120	9997.11
537.115	12027	576.114	12569.6	12094.3
539.534	12034	1683	13717.1	12135.2
541.953	12013	1285.21	10986.3	9782.62
544.372	12024	387.721	7181.77	6851.14
546.789	12023	740.506	5083.19	4379.17
549.206	12028	442.031	3605.12	3189.68
551.622	12041	397.353	3225.41	2851.82
554.037	12079	308.916	2828.8	2541.06
556.451	12171	523.789	3369.95	2870.08
558.864	12399	476.502	4163.83	3718.31
561.277	12688	775.857	4925.02	4184.02
563.689	12790	1046.3	6459.31	5458.5
566.1	12525	1084.52	7415.98	6384.67
568.51	12232	1288.19	8656.48	7430.21
570.92	12112	1111.43	9527.39	8486.68
573.328	12067	1223	9930.34	8780.51
575.736	12042	1671.6	9077.14	7467.77
578.144	12005	977.694	5559.94	4620.75
580.55	12009	404.89	2361.25	1972.8
582.956	12000	265.147	631.891	369.825
585.36	12001	-411.179	-231.266	181.425
587.764	12010	-16.217	-80.7188	-65.0437
590.168	12009	-14.1167	53.0625	67.7438
592.57	12015	623.28	482.172	-142.294
594.972	12050	287.032	711.062	427.594
597.373	12135	638.77	911.875	275.4
599.773	12260	208.273	1047.78	846.562
602.172	12519	200.965	1002.28	808.05
604.571	12959	661.415	1676.19	1023.3
606.969	13339	365.953	1856.78	1503.36
609.366	13284	1192.23	2723.98	1544.62
611.762	12796	2237.39	4175.08	1953.97
614.158	12362	2862.18	5791.45	2953.89
616.553	12201	4271.6	10618	6399.75
618.947	12118	4676.96	17894.3	13328.4
621.34	12114	3734.65	23668.8	20101.6
623.732	12076	2175.17	16719.1	14666.2
626.124	12079	1565.31	6576.83	5053.63
628.515	12125	784.043	2077.31	1304.14
630.905	12203	636.207	1442.47	813.037
633.295	12322	393.187	1046.91	659.213
635.683	12518	581.048	1631	1058.78
638.071	12671	696.474	2686.66	2006.91
640.458	12684	713.85	4470.92	3788.64
642.845	12516	770.45	5712.69	4983.77
645.23	12343	745.17	5491.58	4786.29
647.615	12265	876.22	3950.25	3099.86
649.999	12242	1677.98	4354.73	2699.25
652.383	12248	2552.12	4961.14	2429.27
654.765	12310	3059.18	5874.22	2838.69
657.147	12402	3770.09	6192.86	2443.12
659.528	12459	3295.05	5614.25	2338.69
661.909	12483	2995	4754.67	1774.46
664.288	12404	1979.11	4369.67	2410.65
666.667	12270	1503.08	3658.38	2173.41
669.045	12175	1236.75	3748.16	2532.51
671.423	12156	1005.32	4056.78	3077.1
673.799	12154	1373.19	4724.17	3379.14
676.175	12294	1565.78	6035.64	4507.42
678.55	12553	2375.01	7860.89	5531.98
680.925	13088	3255.31	9602.73	6400.76
683.298	13955	4835.23	11760.6	6983.61
685.671	14590	6057.4	13633.7	7639.99
688.043	14249	6296.59	14446.6	8218.54
690.415	13377	5570.63	13639.8	8136.99
692.786	12745	4510.78	12210.1	7764
695.156	12431	3169.62	10471.7	7363.42
697.525	12274	1425.05	8983.5	7621.97
699.893	12148	1145.78	8423.97	7339.35
702.261	12100	709.167	7433.58	6780.92
704.628	12074	790.777	7038.5	6300.23
706.994	12043	858.411	6776.28	5967.6
709.36	12037	1213.76	6684.27	5516.48
711.725	12027	1822.33	8028.22	6258.04
714.089	12033	2248.2	8943.12	6751.18
716.452	12062	3318.75	9854.64	6590.81
718.815	12072	3487.11	10388	6958.91
721.177	12109	3646.49	10651	7063.37
723.538	12180	3527.26	10510.9	7042.35
725.899	12296	3130.39	10438.8	7369.84
728.258	12462	3062.1	11169.1	8175.17
730.617	12598	2619.87	12205.3	9665.96
732.976	12680	1779.12	13739.5	12060.9
735.333	12615	1569.88	15605.8	14153.9
737.69	12485	1973.99	17748.1	15906.7
740.046	12336	2010.68	19723	17861.1
742.402	12164	2520.4	21803.1	19444.7
744.756	12060	3068.74	23328.4	20429.9
747.11	12005	3627.15	24551.7	21100.4
749.464	12004	4027.57	26793.8	22957.6
751.816	12043	3534.51	30147.1	26836.2
754.168	12031	1834.63	37626.3	36092.4
756.519	12020	721.976	53418.7	53139.5
758.87	11984	4750.52	71630.8	67442.3
761.219	11985	9227.49	74033.1	65350.2
763.568	11970	8822.23	57433.5	49019.8
765.917	11955	5119.78	38948.5	34113
768.264	11953	2892.27	27141.3	24452.8
770.611	11932	2183.52	20637.8	18609.3
772.957	11933	1702.48	15626.1	14040.6
775.303	11934	1585.04	11183.5	9679.09
777.648	11924	1462.5	7917.16	6508.89
779.992	11932	495.147	5190.12	4734.43
782.335	11931	341.846	3995.41	3684.26
784.678	11928	378.606	2939.67	2582.59
787.02	11943	347.553	1801.55	1466.21
789.361	11931	-39.8848	798.266	845.194
791.701	11929	205.443	145.812	-60.1312
794.041	11949	393.147	-68.3125	-465.337
796.38	11932	-221.448	-630.25	-412.237
798.719	11936	-300.176	-613.797	-316.256
801.057	11939	-148.915	-201.703	-53.2313
803.394	11947	-368.031	336.375	710.325
805.73	11968	-204.853	1286.03	1503.41
808.066	11970	-227.92	2933.98	3188.48
810.401	12014	223.85	4558.8	4371.38
812.735	12085	429.59	5273.19	4884.3
815.069	12224	431.512	5924.03	5538.67
817.402	12378	-289.874	6296.91	6642.13
819.734	12418	-164.468	7779.56	8010.79
822.066	12290	-217.189	10596.8	10904.8
824.397	12158	-528.518	13051.3	13693.9
826.727	12080	292.118	15042.8	14874.6
829.056	12065	1282.72	15610.9	14448.6
831.385	12086	1287.19	13131.1	11943.4
833.713	12112	257.618	10312.7	10139.5
836.041	12206	-626.715	8335.16	9037.18
838.367	12429	-868.214	7828.64	8769.94
840.694	12727	-634.803	8282.02	8991.75
843.019	12917	-1620.63	8882.91	10591.8
845.344	12681	-2210.28	10371.3	12687.3
847.668	12300	-2782.51	14151.6	17076.4
849.991	12115	-2149.18	19606.7	21938.7
852.314	12036	348.114	26604.5	26477
854.636	11985	2802.21	28770.9	26186.9
856.958	11981	2472.53	24034.6	21743.3
859.278	11967	1466.02	16857.2	15520.6
861.598	11954	194.035	11591.4	11493.1
863.918	11969	-189.625	7745.02	8001.32
866.236	11954	331.648	6707.98	6429.92
868.554	11956	1016.62	8652.44	7699.99
870.872	11974	1493.72	14175.6	12788.5
873.189	11967	2736.72	24686.7	22134.4
875.505	11974	4329.77	36599.7	32541.1
877.82	11993	5501.51	42957.4	37770.6
880.135	12034	4510.02	37571.6	33339.4
882.449	12058	2761.5	26358.8	23795.6
884.762	12151	1621.92	18569.5	17090
887.075	12258	848.305	14023.3	13285.7
889.387	12338	1377.18	13684.4	12410.7
891.698	12357	2077.26	15112.6	13144.9
894.009	12334	1654.94	16868.5	15341.4
896.319	12368	1357.23	17787.9	16568.7
898.629	12341	339.706	18960.9	18777.7
900.938	12197	-198.517	18565.8	18922
903.246	12126	-579.157	17021.6	17748.7
905.553	12068	-1224.99	13522.6	14871.6
907.86	12077	-1115.66	9565.7	10771.1
910.166	12086	-993.024	4861.91	5904.13
912.472	12098	-731.343	1652.47	2403.84
914.777	12186	-247.9	-419.297	-172.837
917.081	12339	191.8	-595.812	-794.231
919.385	12515	140.803	27.7344	-114.019
921.687	12503	371.692	1935.98	1577.44
923.99	12328	324.622	4112.19	3819.39
926.291	12143	963.774	5879.52	4957.05
928.592	12077	577.905	6839.41	6314.12
930.893	12075	659.624	8179.23	7582.8
933.193	12052	144.379	8285.19	8209.22
935.492	12058	-627.073	8112.94	8813.46
937.79	12071	-707.031	7976.25	8756.25
940.088	12097	-7.39594	7967.2	8041.61
942.385	12141	623.082	7592.48	7027.97
944.682	12287	235.15	5564.55	5374.18
946.978	12457	-167.171	3244.09	3439.93
949.273	12581	-341.573	900.75	1252.76
951.567	12508	432.667	1603.12	1180.29
953.862	12252	1981.67	4975.17	3018.66
956.155	12117	2821.99	9063.59	6294.06
958.448	12065	3616.22	11691.1	8142.71
960.74	12038	2961.73	12307.5	9424.28
963.031	12019	1812.65	10240.5	8498.72
965.322	12028	452.799	7217.88	6821.92
967.612	12023	-11.3581	5343.05	5399.4
969.902	12049	-1172.86	4804.64	6027.73
972.191	12127	-1165.68	6074.39	7300.91
974.479	12167	-1592.77	6734.42	8397.17
976.767	12219	-1569.69	6381.5	8018.01
979.054	12126	-642.074	7682.12	8394.15
981.341	12066	-36.9722	9366.59	9482.59
983.627	12017	217.349	12557.5	12443.9
985.912	11995	839.678	18266.9	17573.6
988.196	12006	1696.51	22878	21359.5
990.48	12002	1601.78	28614.4	27239.6
992.764	12004	1677.63	32325.4	30905.3
995.047	12007	2856.75	41191.7	38657.1
997.329	11992	4603.37	62022.2	57901.3
999.61	12046	4788.42	108220	104300
1001.89	12071	1791.87	165924	165511
1004.17	12110	68.1438	178985	180420
1006.45	12155	4600.56	132480	128954
1008.73	12290	7242.62	93994.6	87481
1011.01	12441	5981.87	84714.7	79394.4
1013.29	12661	-283.53	62177.1	62985.5
1015.56	12844	-3731.24	34296.7	38347.5
1017.84	12927	-2216.85	19552	21951.8
1020.12	12952	580.497	16912.1	16468.8
1022.39	12957	2979.36	20864.5	18035.4
1024.67	12957	5056.27	30316.9	25472.9
1026.94	12931	5819.36	42466.9	36955.5
1029.21	12890	5453.18	58733.3	53727.9
1031.49	12714	4264.7	68389.7	64663.8
1033.76	12540	2781.71	63841.3	61572.7
1036.03	12365	982.604	43487.3	42861.8
1038.3	12276	-2215.29	23695.2	26128.3
1040.57	12278	-3341.8	11732.8	15201.2
1042.84	12402	-4018.89	5499.33	9598.2
1045.11	12665	-4203.19	2390.25	6648.84
1047.38	12918	-3765.03	1352.66	5160.69
1049.65	12851	-4442.87	591.391	5076.56
1051.92	12514	-4765.41	1638.38	6457.59
1054.19	12323	-3682.28	4548.2	8299.65
1056.45	12319	-1544.67	8327.12	9954.75
1058.72	12528	-104.721	13484.1	13703
1060.98	12959	870.369	16815.6	16079.2
1063.25	13381	783.713	16035.1	15379.6
1065.51	13220	-300.601	12227.7	12633.6
1067.78	12726	-1294.86	10241.8	11633.6
1070.04	12419	-1697.37	8922.88	10709.5
1072.3	12336	-1374.87	9741.23	11209.5
1074.56	12361	-1129.67	10419	11645.7
1076.82	12289	240.666	12139.2	11998.6
1079.09	12182	516.095	14142.9	13741.3
1081.35	12058	-27.2119	15463.7	15621.1
1083.6	12009	-50.8306	15881.5	16066.2
1085.86	12008	-485.104	15247.7	15865
1088.12	11992	-838.76	14327.7	15293.9
1090.38	12007	-48.9459	13603.8	13767.5
1092.64	12036	197.379	15087.3	15015.1
1094.89	12100	1541.89	17298.3	15888.9
1097.15	12192	1985.67	19537.4	17699.2
1099.4	12225	2683.4	22236	19716.9
1101.66	12160	1597.8	22576.7	21155.2
1103.91	12070	1139.13	23402	22449.9
1106.17	12037	399.69	22415.4	22200.7
1108.42	11998	1172.48	21735.2	20735.5
1110.67	11984	1094.36	20554.4	19623.6
1112.93	12041	1487.31	19222.6	17884.3
1115.18	12046	884.063	18441.1	17704.5
1117.43	12073	822.413	18866.2	18195.4
1119.68	12058	781.603	20301.7	19684.1
1121.93	11993	56.1122	20984.8	21104.6
1124.18	11957	-154.445	22439.8	22784.1
1126.43	11945	541.533	23991.9	23647.4
1128.67	11950	-271.567	23084.7	23552.5
1130.92	11950	-46.0373	19313.4	19522.1
1133.17	11970	-368.038	14060.3	14549.5
1135.42	12030	-1065.86	7994.7	9136.71
1137.66	12109	-1101.87	3893.16	5037
1139.91	12132	-1102.37	911.812	2031.11
1142.15	12095	-1378.64	-288.641	1099.16
1144.4	12017	-1948.77	892.203	2864.85
1146.64	11972	-2028.73	3267.73	5340.98
1148.88	11950	-1368.92	7054.81	8494.52
1151.12	11950	-1207.55	9891.38	11192.2
1153.37	11985	-1681.55	13050.8	14856.1
1155.61	12011	-744.307	15882.2	16766.2
1157.85	11998	-507.261	15380.6	16021.4
1160.09	11957	521.999	12272.8	11849.5
1162.33	11920	1020.74	7131.7	6162.32
1164.57	11899	1561.01	2973.58	1424.44
1166.81	11904	1396.32	1118.27	-280.388
1169.05	11887	958.93	453.812	-509.362
1171.28	11891	1071.1	505.984	-569.869
1173.52	11884	202.257	-296.297	-502.744
1175.76	11877	-648.827	-1667.67	-1027.41
1177.99	11882	-692.881	-1319.45	-631.838
1180.23	11886	546.523	2114.42	1581.08
1182.46	11892	231.127	2996.2	2788.31
1184.7	11900	-108.973	2093.53	2221.01
1186.93	11908	-347.461	1549.25	1912.65
1189.16	11929	15.3513	2841.75	2850.15
1191.4	11948	1194.45	5435	4276.18
1193.63	11995	2220.08	9096.45	6934.16
1195.86	12096	2048.98	10538.8	8561.16
1198.09	12271	1013.18	11376.5	10450.4
1200.32	12506	353.659	13965	13725.7
1202.55	12601	807.729	22538.4	21913.3
1204.78	12474	2477.29	31607.1	29374.6
1207.01	12236	3396.44	34582.5	31448.2
1209.24	12127	2532.51	31530.5	29241.6
1211.47	12078	1245.12	27915.9	26894.9
1213.7	12040	1572.07	29955.7	28622.1
1215.92	11975	2148.99	35291.6	33421.1
1218.15	11942	2120.66	42195	40411.1
1220.38	11914	2175.38	49722.2	47946.4
1222.6	11895	2899.22	55965.1	53511.8
1224.83	11889	3637.76	63400.4	60264.8
1227.05	11907	4289.76	69510.3	65768.6
1229.27	11924	4380.26	74134.9	70340.9
1231.5	11988	2402.9	75625.1	73837.5
1233.72	12075	1677.88	79000.7	77972.5
1235.94	12121	689.537	79711.4	79685.9
1238.16	12083	-1326.38	77590.8	79580.3
1240.38	12004	-1216.34	74683.8	76538
1242.61	11965	-1657.5	70995.5	73263.5
1244.83	11918	-1676.6	68013.3	70275.5
1247.05	11913	-1987.06	64847.7	67396.4
1249.27	11903	-995.124	62054.1	63579.1
1251.48	11901	-2334.56	57129.5	59963.8
1253.7	11918	-2008.46	52902.9	55372.8
1255.92	11962	-1339.49	50092.9	51864.6
1258.14	12023	-1542.71	48044	50003.5
1260.35	12035	-1547.21	45912.6	47858.6
1262.57	11982	-1406.84	42785.7	44563.9
1264.79	11987	-879.951	40666.5	41895.6
1267	12005	945.868	38468	37837.4
1269.22	12107	949.355	35688.3	35030.9
1271.43	12288	682.635	33255.6	32846.7
1273.64	12359	340.336	30403.6	30315.9
1275.86	12287	405.19	28313.9	28143.2
1278.07	12173	-368.011	26166.9	26757.9
1280.28	12178	-966.48	23064.9	24233.4
1282.49	12223	-1305.52	20501.2	21989.9
1284.7	12187	-2291.85	17085.5	19540.2
1286.91	12127	-1819.57	14804.6	16763.8
1289.12	12110	-2135.82	13257.4	15522.6
1291.33	12107	-1545.35	13469.1	15140.7
1293.54	12092	-1887.39	12825	14836
1295.75	12127	-964.751	13966.6	15056.9
1297.96	12105	-202.736	16043.9	16383.2
1300.17	12180	-522.299	17990.5	18668.4
1302.38	12286	183.974	20620.2	20608
1304.58	12493	1765.41	22239.2	20645.8
1306.79	12687	2348.2	24718.6	22558.4
1308.99	12790	2353.78	25572.9	23414.2
1311.2	12606	2036.7	26701.5	24872.1
1313.4	12418	1039.33	27959.7	27146.6
1315.61	12282	1117.53	29607.1	28728.9
1317.81	12245	1145.83	31592.6	30702.6
1320.02	12192	2208.64	33481.5	31535.6
1322.22	12146	1686.52	34299.5	32887
1324.42	12159	2431.71	36960.7	34819.1
1326.62	12214	1730.09	39568	38155.9
1328.83	12220	2915.26	42312.7	39728.6
1331.03	12131	3500.6	45621.2	42474.5
1333.23	12037	3085.58	47435.1	44722.2
1335.43	11975	1634.74	47740.3	46493
1337.63	11967	-300.141	45891.1	46579.4
1339.83	11951	-1599.63	40363.8	42316.1
1342.02	11934	-2311.43	37979.7	40629.7
1344.22	11920	-781.536	35723.8	36812.1
1346.42	11921	-507.092	32891.2	33678.9
1348.62	11934	-295.041	29479.8	30025
1350.81	11950	-1027.44	26693.1	27953.5
1353.01	11947	-894.493	28791.3	29935.2
1355.21	12011	-40.9317	35043.2	35378.9
1357.4	12039	1064.12	43488.3	42780.7
1359.6	12090	3633.93	46653	43380.6
1361.79	12119	4668.15	41206.1	36845
1363.98	12115	4986.61	28528.5	23739.7
1366.18	12125	2900.15	15059.6	12261.7
1368.37	12117	1258.17	6073.48	4855.78
1370.56	12121	353.782	1143.72	796.575
1372.76	12152	331.06	-23.5781	-357.619
1374.95	12219	-377.909	-707.688	-332.55
1377.14	12287	-523	56.7344	584.606
1379.33	12343	-476.938	1326.27	1818.36
1381.52	12357	-370.012	3608.34	4011.79
1383.71	12302	110.681	4806.72	4735.5
1385.9	12247	20.0734	7761.95	7806.94
1388.09	12154	-250.058	10076.3	10413.1
1390.28	12109	1187.81	12922.6	11833.4
1392.46	12037	1586.74	16483.3	15021.8
1394.65	12022	2509.84	19370.7	17002.5
1396.84	12005	3130.5	21988.8	19016.8
1399.03	12016	3472.54	23240.1	19933.7
1401.21	12007	3971.5	23993.1	20189.8
1403.4	12020	3756.83	24000.5	20413.8
1405.58	12034	3249.58	23178	20095.9
1407.77	12067	3273.22	22363.8	19251
1409.95	12104	2478.26	21027	18704.6
1412.14	12114	2504.02	21468	19123.4
1414.32	12114	1621.43	21052.5	19594.3
1416.5	12105	2233.99	23814.5	21761.8
1418.69	12101	2663.6	27357	24900.9
1420.87	12130	2788.25	30831.8	28279.2
1423.05	12182	3004.61	34244.3	31502.2
1425.23	12364	3683.44	38778.3	35389.7
1427.41	12679	5495.43	46038.4	40883.7
1429.59	12902	6922	55400.6	48886
1431.77	12914	8412.86	65296.2	57361.4
1433.95	12889	7539.29	73388.8	66402.8
1436.13	12957	5624.34	82162.5	77181.3
1438.31	12858	3810.11	91410.8	88336.9
1440.49	12657	2627.31	100104	98296.3
1442.67	12690	611.665	105339	105607
1444.85	12854	-1171.07	105599	107667
1447.02	12762	-1556.92	102568	105000
1449.2	12401	-3025.44	94286	98129.2
1451.38	12177	-2577.92	90157.3	93514.6
1453.55	12091	-2089.02	91346.6	94220.8
1455.73	12056	-683.168	94261.1	95742.1
1457.9	12045	-588.965	94866.6	96257.7
1460.08	12021	736.402	92433.6	92467.7
1462.25	11998	701.599	83890.7	83888.2
1464.43	11996	197.48	71550	71952.2
1466.6	11935	-932.126	58529.1	59960.9
1468.77	11939	-2049.73	45972.7	48426
1470.94	11910	-1661	35441.2	37414
1473.12	11915	-1582.98	25544	27355
1475.29	11901	-1616.92	17923.9	19705.1
1477.46	11899	-616.179	11800.3	12520.8
1479.63	11902	-683.352	6508.47	7252.26
1481.8	11897	-846.629	3179.53	4059.99
1483.97	11903	-149.668	1669.27	1834.22
1486.14	11895	121.022	582.5	465.356
1488.31	11889	179.285	1049.55	877.575
1490.48	11891	954.994	2795.03	1855.5
1492.65	11883	726.935	3145.7	2439.09
1494.81	11885	359.499	2245.5	1901.85
1496.98	11886	105.032	609.797	509.006
1499.15	11863	99.6933	-274.469	-377.306
1501.32	11867	57.7536	-1322.22	-1391.57
1503.48	11873	-122.317	-1382.75	-1271.03
1505.65	11873	68.2986	-944.484	-1021.29
1507.81	11893	-176.461	-500.922	-327.188
1509.98	11875	-40.2927	533.641	578.756
1512.14	11892	-406.155	1145.83	1565.03
1514.31	11869	51.6387	2921.55	2894.02
1516.47	11894	-448.03	3709.33	4192.29
1518.64	11885	-354.531	5138.84	5539.54
1520.8	11899	-116.251	6369.45	6540.21
1522.96	11902	431.136	7920.53	7552.33
1525.12	11891	269.863	9110.19	8914.61
1527.29	11875	631.134	10740.5	10194.3
1529.45	11862	749.76	12195.7	11542.1
1531.61	11861	797.497	13924.7	13237.5
1533.77	11857	737.132	15426.2	14812.6
1535.93	11861	652.282	18808	18308.3
1538.09	11851	1251.61	23796.1	22733.9
1540.25	11848	2211.46	32379.1	30421.1
1542.41	11861	3122.54	46194.2	43433.6
1544.57	11850	3833.99	63464.7	60131.8
1546.73	11856	2851.14	75951	73714.1
1548.89	11859	3.53719	77775.6	78425.6
1551.04	11852	-945.557	69720	71259.3
1553.2	11859	1208.15	60119.4	59406.3
1555.36	11878	5801.51	50805	45381.7
1557.52	11885	7451.5	41275.5	34108.2
1559.67	11872	5426.62	31633.9	26427.5
1561.83	11882	2948	24245.9	21476.9
1563.98	11895	2090.68	19794.4	17852.5
1566.14	11898	1146.22	17043.7	16031
1568.29	11899	1122.74	15446.3	14444
1570.45	11909	438.231	14713.8	14395.5
1572.6	11900	-190.002	15173	15492.1
1574.75	11929	753.164	19017.6	18417.9
1576.91	11936	1773.98	23730	22140.5
1579.06	11947	2189.01	25762.1	23771.2
1581.21	11952	1164.57	24981.1	24016.6
1583.37	11973	-561.459	23359.8	24122.3
1585.52	11990	-968.121	19114.4	20251.3
1587.67	12002	-1140.58	12770.9	14028.4
1589.82	12009	-461.954	9015.19	9556.78
1591.97	12012	650.317	9651.33	9076.65
1594.12	12036	1056.84	13054.8	12098.8
1596.27	12053	903.12	17857.8	17097.2
1598.42	12042	1170.84	25690	24725.2
1600.57	12041	481.183	36029.2	35846.8
1602.72	12070	-1300.45	44475.9	46161
1604.87	12054	-2545.73	45716.1	48667.4
1607.02	12063	-2951.25	38529.8	41829.6
1609.16	12061	-2693.24	29097.1	32057.5
1611.31	12052	-1895.27	23841.4	25952.9
1613.46	12060	-532.855	24638.8	25383.1
1615.61	12058	747.245	28941.1	28430.8
1617.75	12049	722.704	33071.1	32620.3
1619.9	12035	-304.511	32852.4	33435.6
1622.04	12034	-1005.5	29786	31050.3
1624.19	12022	-1314.01	26539.5	28087.6
1626.33	12005	-1445.69	25494.8	27166.9
1628.48	11985	-1505.65	26025.1	27762.1
1630.62	11970	-975.229	28770.2	29995.4
1632.77	11970	-477.874	32832.6	33590.4
1634.91	11953	-110.073	37174.4	37597.8
1637.05	11940	-245.218	41406	42001.3
1639.2	11927	313.124	47218	47299.1
1641.34	11908	493.602	52626.6	52571.1
1643.48	11905	262.599	58475.8	58702.4
1645.62	11907	706.877	64286.5	64113.9
1647.77	11882	-514.444	70030.2	71137.4
1649.91	11884	-227.484	78686.6	79577.3
1652.05	11874	-968.33	85295.7	86989
1654.19	11873	-1170.08	94840.1	96817
1656.33	11863	-2073.5	105106	108080
1658.47	11860	-2111.09	116451	119558
1660.61	11855	-1204.31	131448	133767
1662.75	11862	822.426	147662	148074
1664.89	11858	1089.82	161023	161277
1667.03	11850	525.099	166115	166981
1669.16	11858	147.919	163268	164491
1671.3	11859	-569.538	156227	158114
1673.44	11885	19.4425	150530	151775
1675.58	11904	602.542	142422	143012
1677.71	11948	1343.51	134571	134347
1679.85	12024	1490.48	120105	119611
1681.99	12122	1580.14	105582	104876
1684.12	12184	1051.83	90523.3	90223.3
1686.26	12170	41.7483	77960.1	78573.2
1688.39	12066	-88.838	67242.4	67897.1
1690.53	12001	-626.467	57776.3	58893.5
1692.66	11941	-1207.25	47546.8	49163.8
1694.8	11915	-1395.77	38995.9	40731.1
1696.93	11884	-1333.6	31309.3	32917.3
1699.07	11863	-1164.73	24436.2	25816.1
1701.2	11870	-475.025	20050.6	20698.1
1703.33	11869	-170.189	15812.8	16117.3
1705.47	11894	445.695	12647.1	12303.9
1707.6	11906	928.711	10205	9354.22
1709.73	11893	990.028	7583	6648.38
1711.86	11888	942.374	5338.53	4433.1
1713.99	11869	585.006	2866.42	2300.59
1716.13	11856	414.785	1298.45	891.094
1718.26	11846	357.407	358.578	1.18125
1720.39	11831	305.723	-395.188	-706.8
1722.52	11818	-148.884	-753.906	-610.106
1724.65	11829	-122.654	-734.5	-616.987
1726.78	11818	90.1406	-510.438	-605.625
1728.91	11807	-115.817	-411.234	-297.9
1731.04	11818	-207.049	207.016	417.544
1733.16	11815	-609.802	975.984	1599.11
1735.29	11813	-608.187	1653.3	2280.49
1737.42	11811	-999.796	2558.45	3588.15
1739.55	11822	-1143.88	3347.11	4528.73
1741.68	11816	-1465.77	4079.02	5591.38
1743.8	11814	-1137.74	4644.08	5830.41
1745.93	11820	-1389.28	5224.22	6669.08
1748.06	11799	-1419.36	4964.39	6437.4
1750.19	11806	-838.692	4859.44	5746.01
1752.31	11814	-558.371	4627.89	5229.84
1754.44	11809	-678.024	4263.56	4983.11
1756.56	11813	-147.612	4083.27	4266.43
1758.69	11818	-16.2875	3850.47	3899.25
1760.81	11811	-229.035	3619.8	3881.18
1762.94	11813	337.468	4044.58	3738.26
1765.06	11802	190.113	4129.81	3972.81
1767.19	11808	242.512	4198.41	3989.14
1769.31	11805	32.2734	4358.11	4362.19
1771.43	11808	87.9106	4347.52	4295.4
1773.56	11811	35.8187	4432.12	4433.25
1775.68	11810	340.738	4686.17	4381.95
1777.8	11818	201.361	4593	4428.54
1779.93	11814	207.208	4489.52	4318.29
1782.05	11807	447.102	4600.41	4188.21
1784.17	11811	484.357	4460.89	4009.95
1786.29	11807	265.53	4175.22	3942.54
1788.41	11812	663.261	4368.05	3735.92
1790.53	11815	678.925	4204.67	3555.38
1792.65	11816	564.992	4224.39	3690.15
1794.78	11817	477.209	3999.52	3551.91
1796.9	11818	605.51	4210.48	3635.27
1799.02	11817	836.448	4293.84	3486.45
1801.14	11813	850.637	4099.67	3276.34
1803.25	11806	634.431	3864.11	3256.82
1805.37	11804	839.573	4218.58	3407.4
1807.49	11809	1001.84	4363.52	3389.93
1809.61	11813	806.024	4311.58	3535.01
1811.73	11814	1082.19	4333.55	3278.68
1813.85	11816	747.724	4238.42	3520.03
1815.97	11810	996.834	4312.75	3343.78
1818.08	11806	834.893	4350.08	3544.73
1820.2	11812	933.731	4373.5	3468.68
1822.32	11808	914.79	4426.31	3541.03
1824.43	11813	612.752	4473.09	3892.78
1826.55	11814	986.652	4495.52	3538.35
1828.67	11803	1034.21	4476.19	3470.91
1830.78	11805	765.61	4358.8	3623.38
1832.9	11817	936.292	4395.25	3488.02
1835.01	11804	1105.32	4457.72	3380.57
1837.13	11806	777.993	4363.2	3615.34
1839.24	11817	1064.48	4551.7	3516.52
1841.36	11819	888.901	4303.62	3443.42
1843.47	11818	794.152	4354	3589.76
1845.59	11811	1059.12	4402.69	3371.66
1847.7	11809	945.117	4429.05	3513.21
1849.82	11810	1017.74	4365.95	3376.35
1851.93	11814	1256.98	4522.56	3293.02
1854.04	11804	1082.86	4448.02	3393.43
1856.16	11793	834.897	4276.27	3470.29
1858.27	11813	1267.92	4445.58	3204.36
1860.38	11816	1148.44	4385.89	3264.66
1862.49	11814	1000.79	4207.3	3233.46
1864.61	11809	1056.92	4174.91	3144.19
1866.72	11808	992.826	4078.81	3111.92
1868.83	11812	1150.3	4081.55	2955.88
1870.94	11816	1042.68	4108.95	3092.04
1873.05	11818	1115.58	3982.83	2891.34
1875.16	11822	875.473	3548.64	2695.63
1877.27	11806	924.343	3725.16	2824.35
1879.38	11813	1091.37	3519.06	2448.09
1881.49	11814	1017.53	3376.52	2378.81
1883.6	11823	967.775	3389.8	2442.38
1885.71	11812	1204.41	3334.06	2147.55
1887.82	11829	990.554	3230.86	2259.13
1889.93	11810	1104.85	3270	2183.34
1892.04	11823	1239.98	3176.5	1952.79
1894.15	11814	1109.67	3266.44	2174.89
1896.26	11815	1083.85	2995.17	1927.39
1898.37	11827	707.395	2757.28	2067.11
1900.47	11823	1178.55	2749.48	1584.13
1902.58	11823	1422.39	3153.67	1745.83
1904.69	11818	1043.13	2629.53	1599.73
1906.8	11828	1367.19	2790.27	1435.03
1908.9	11824	1199.87	2554.39	1365.9
1911.01	11822	1145.03	2616.78	1484.12
1913.12	11826	1075.37	2368.64	1304.14
1915.22	11823	1169.49	2494.42	1336.07
1917.33	11828	1480.38	2573.06	1101.86
1919.44	11821	1153.47	2369.67	1226.42
1921.54	11833	1202.92	2418.38	1225.67
1923.65	11834	1132.25	2267.75	1145.04
1925.75	11826	1111.65	2244.25	1142.12
1927.86	11829	1281.81	2386.08	1113.54
1929.96	11826	1292.72	2318.02	1033.91
1932.07	11830	971.198	2072.08	1110.13
1934.17	11842	1105.63	2101.06	1003.8
1936.28	11830	920.105	1966.47	1055.16
1938.38	11824	1446.65	2306.7	867.281
1940.48	11834	1042.93	1801.02	764.456
1942.59	11838	1098.75	1666.27	572.287
1944.69	11837	1031.12	1682.64	657
1946.79	11827	1183.21	1745.48	567
1948.9	11847	1016.59	1614.25	602.681
1951	11829	1076.03	1444.19	371.25
1953.1	11822	806.157	1402.72	601.575
1955.21	11835	1000.89	1256.92	258.188
1957.31	11838	908.35	1419.64	515.588
1959.41	11830	804.616	1167.25	365.681
1961.51	11840	787.436	1181.05	396.919
1963.61	11835	708.779	1088.89	383.306
1965.71	11831	536.661	973.781	440.794
1967.82	11833	446.612	1089.16	647.944
1969.92	11832	706.759	952.141	247.444
1972.02	11830	910.235	1111.14	202.594
1974.12	11830	424.065	819.703	398.962
1976.22	11830	560.309	862.922	305.156
1978.32	11830	461.024	766.203	307.744
1980.42	11828	469.758	719.547	251.887
1982.52	11825	411.291	540.406	130.2
1984.62	11810	392.501	786.484	397.294
1986.72	11837	571.094	779.047	209.7
1988.82	11823	330.249	530.578	202.012
1990.92	11821	260.983	368.641	108.562
1993.02	11824	467.825	528.125	60.8063
1995.11	11823	540.091	472.094	-68.5687
1997.21	11823	27.5506	174.516	148.2
1999.31	11813	226.759	425.266	200.175
2001.41	11816	129.92	345.031	216.919
2003.51	11816	174.449	300.031	126.638
2005.61	11830	82.1045	322.875	242.794
2007.7	11828	-52.5206	206.453	261.15
2009.8	11833	-98.5544	25.875	125.475
2011.9	11828	123.795	387.547	265.969
2014	11822	167.256	394.062	228.712
2016.09	11826	197.77	269.281	72.1125
2018.19	11818	369.332	443.781	75.075
2020.29	11816	142.355	303.172	162.169
2022.38	11814	177.49	214.547	37.3688
2024.48	11818	24.2452	-65.9531	-90.9563
2026.57	11824	278.425	487.438	210.769
2028.67	11825	-177.725	-71.4062	107.213
2030.77	11828	-8.38703	115.875	125.306
2032.86	11815	99.972	346.172	248.269
2034.96	11813	73.3878	181.641	109.162
2037.05	11815	17.8039	420.266	405.844
2039.15	11821	113.341	256.234	144.094
2041.24	11815	-100.765	156.703	259.631
2043.34	11822	-372.361	20.4688	396.131
2045.43	11819	-247.21	-61.3281	187.444
2047.53	11824	-95.5413	223.453	321.675
2049.62	11817	145.802	310.766	166.35
2051.71	11823	-19.3067	175.5	196.444
2053.81	11809	-67.7227	283.234	353.906
2055.9	11818	-54.0941	153.375	209.212
2058	11825	241.59	469.141	229.462
2060.09	11837	304.76	437.984	134.344
2062.18	11829	34.9095	377.797	345.769
2064.28	11811	-26.2525	378.422	408.075
2066.37	11826	-115.385	270.156	388.781
2068.46	11820	179.374	484.609	307.8
2070.55	11822	185.419	446.828	263.606
2072.65	11828	-156.477	288.75	448.969
2074.74	11823	43.3333	526.641	487.369
2076.83	11820	-90.1622	95.8125	187.538
2078.92	11821	-182.831	180.938	366.825
2081.02	11820	-316.426	125.641	445.781
2083.11	11825	-278.998	283.891	567.619
2085.2	11821	-67.0408	262.422	332.231
2087.29	11819	-284.855	157.844	446.419
2089.38	11821	173.273	412.203	240.938
2091.47	11825	24.8669	71.5	47.025
2093.57	11823	-239.384	153.781	396.469
2095.66	11827	-111.084	276.781	391.125
2097.75	11824	-405.513	26.2344	435.375
2099.84	11837	-101.434	308.094	412.969
2101.93	11831	21.1433	-7.54688	-28.9312
2104.02	11825	-171.343	336.359	511.969
2106.11	11824	-242.148	91.3125	336.263
2108.2	11828	-0.749219	324.734	328.219
2110.29	11818	-253.555	26.1875	282.094
2112.38	11823	-52.8406	423.531	480.375
2114.47	11814	-120.154	472.484	597.619
2116.56	11831	-164.359	204.969	372.431
2118.65	11828	-125.46	364.281	493.856
2120.74	11834	-51.8834	458.812	514.987
2122.83	11823	-234.801	313.641	553.05
2124.92	11821	-244.311	327.484	576.6
2127.01	11837	-249.253	375.125	629.625
2129.09	11830	-271.007	409.859	686.588
2131.18	11821	-160.25	506.875	672.731
2133.27	11818	-193.33	562.078	761.756
2135.36	11825	-175.359	651.375	833.681
2137.45	11836	-549.292	427.828	985.331
2139.54	11835	-350.813	200.641	556.088
2141.62	11822	-191.535	306.703	502.425
2143.71	11838	-94.2931	446.859	545.7
2145.8	11828	-306.392	194.375	504.975
2147.89	11831	-27.0409	646.016	678.713
2149.98	11826	-207.905	543.078	757.294
2152.06	11833	-405.922	174.984	585.787
2154.15	11833	-255.916	345.312	606.281
2156.24	11833	-480.786	218.562	705.225
2158.33	11826	-269.179	547.328	823.369
2160.41	11836	-374.277	224.516	603.825
2162.5	11835	-267.546	477.375	751.181
2164.59	11828	-218.032	560.953	785.531
2166.67	11829	-132.886	432.922	570.562
2168.76	11835	-189.492	440.688	635.475
2170.85	11828	-279.112	640.609	927.45
2172.93	11824	-292.821	505.688	805.219
2175.02	11822	-185.002	506.406	697.219
2177.11	11826	-194.513	600.5	801.694
2179.19	11824	-468.924	491.703	968.7
2181.28	11819	-488.943	403.297	899.737
2183.36	11830	77.2797	666.516	594.188
2185.45	11838	-282.62	668.172	958.781
2187.54	11828	-74.4816	687.453	768.338
2189.62	11825	-367.73	545.391	920.794
2191.71	11848	-93.1095	668.844	768.356
2193.79	11826	-24.8025	794.141	825.825
2195.88	11827	-120.814	950	1079.81
2197.96	11833	24.0447	818.109	800.737
2200.05	11842	-347.065	632.938	988.237
2202.13	11836	-233.825	878.844	1122.02
2204.22	11839	-159.478	962.859	1131.77
2206.3	11841	-422.428	740.406	1172.61
2208.39	11845	-347.023	1040.31	1398.99
2210.47	11842	29.2966	1027	1006.09
2212.56	11839	-193.665	764.75	966.469
2214.64	11832	-405.649	903.891	1320.54
2216.73	11837	-157.726	907.547	1074.22
2218.81	11836	-215.632	1104.86	1331.59
2220.89	11840	-135.12	1018.64	1163.46
2222.98	11843	-193.135	972.656	1175.59
2225.06	11846	-285.443	931.797	1227.47
2227.15	11846	-147.641	872.375	1028.59
2229.23	11850	-158.11	976.406	1144.05
2231.32	11837	-196.293	829.766	1034.68
2233.4	11847	-372.946	860.656	1243.97
2235.48	11833	-273.026	749.5	1031.12
2237.57	11828	105.237	929.609	831.3
2239.65	11845	115.641	1209.05	1102.59
2241.73	11837	-154.53	667.406	828.844
2243.82	11838	-102.372	807.922	917.944
2245.9	11844	-260.279	872.75	1142.55
2247.98	11827	-136.446	747.984	891.862
2250.07	11853	-557.499	684.266	1252.2
2252.15	11845	-24.9587	950.172	983.325
2254.23	11847	-362.032	840.891	1213.03
2256.32	11845	-55.5347	895.312	958.838
2258.4	11838	65.4467	817.359	758.231
2260.48	11837	-435.028	610.703	1054.52
2262.56	11836	-186.851	840.547	1036.03
2264.65	11853	-102.27	684.859	793.744
2266.73	11855	56.8481	846.859	796.65
2268.81	11839	-222.216	702.266	932.25
2270.9	11844	-486.518	294.141	787.219
2272.98	11838	-54.6728	649.547	710.138
2275.06	11844	-17.2767	544.422	566.419
2277.14	11843	-62.2562	481.797	548.625
2279.22	11851	-262.109	433.688	701.644
2281.31	11846	-192.233	246.375	442.294
2283.39	11851	87.5006	414.453	329.7
2285.47	11843	140.99	418.688	280.031
2287.55	11853	-122.441	68.7031	192.75
2289.64	11841	-86.2723	27.0938	114.319
2291.72	11847	-18.0884	233.188	253.387
2293.8	11843	41.6067	16.375	-25.4438
2295.88	11849	-32.1138	-4	28.35
2297.96	11843	-163.607	73.5938	239.194
2300.05	11854	-18.9977	157.922	178.406
2302.13	11859	-8.54672	-36.0469	-27.7313
2304.21	11844	-13.5542	263.734	279.619
2306.29	11843	21.9602	119.484	98.3438
2308.37	11855	15.957	204.219	189.844
2310.45	11848	-214.915	164.062	382.163
2312.54	11846	-123.434	180.016	306
2314.62	11847	66.1994	387.797	324.3
2316.7	11850	-6.01047	317.391	326.119
2318.78	11843	-64.3558	243.984	310.931
2320.86	11850	3.31781	423.797	424.013
2322.94	11856	-215.666	309.031	529.106
2325.02	11847	191.988	632.734	444.45
2327.1	11854	233.216	835.672	607.519
2329.19	11862	156.283	738.844	587.456
2331.27	11856	232.321	840.969	613.763
2333.35	11867	176.711	871.969	701.1
2335.43	11866	-37.2605	916.469	961.744
2337.51	11868	110.579	784.156	679.237
2339.59	11858	26.6686	870.062	850.481
2341.67	11854	249.277	881	637.031
2343.75	11858	76.8391	825.609	755.062
2345.83	11852	176.62	918.25	747.862
2347.92	11860	356.493	891.938	539.944
2350	11847	-10.1127	848.156	865.481
2352.08	11856	284.081	791.281	511.462
2354.16	11858	130.923	556.516	429.169
2356.24	11848	23.7414	277.453	255.844
2358.32	11864	86.2172	627.109	545.438
2360.4	11868	150.551	579.453	432.506
2362.48	11871	312.819	612.625	302.325
2364.56	11861	71.5277	475.328	407.194
2366.64	11864	129.036	371.312	244.312
2368.72	11871	199.861	287.047	87.9187
2370.8	11867	164.367	316.594	153.506
2372.89	11866	307.977	412.734	105.638
2374.97	11871	-198.382	-17.6875	182.212
2377.05	11874	132.289	263.375	132.188
2379.13	11872	277.055	415.672	139.781
2381.21	11868	-71.4478	144.5	217.762
2383.29	11867	108.619	432.188	326.288
2385.37	11870	-5.3325	383.5	392.1
2387.45	11847	-43.9369	268.141	314.7
2389.53	11864	56.6419	496.719	443.775
2391.61	11867	-45.225	389.125	438
2393.69	11867	-51.3963	440.297	495.825
2395.77	11870	253.743	771.672	522.281
2397.85	11860	-77.2881	264.391	344.55
2399.93	11864	333.475	629.469	298.481
2402.01	11865	-161.581	438.328	604.95
2404.09	11875	97.3069	706.141	613.95
2406.18	11877	-4.71859	702.234	712.894
2408.26	11864	99.6922	576.25	480.562
2410.34	11866	294.419	669.641	378.375
2412.42	11876	3.19734	563.297	564.806
2414.5	11873	252.726	922.547	675.45
2416.58	11882	207.889	642.016	437.775
2418.66	11878	171.651	666.375	498.881
2420.74	11900	8.50453	685.484	682.669
2422.82	11879	2.18109	510.516	512.606
2424.9	11873	214.548	783.609	573.844
2426.98	11889	-92.7727	386.109	482.906
2429.06	11875	-286.427	470.469	763.256
2431.14	11875	-288.979	368.031	662.531
2433.22	11888	39.17	796.828	764.025
2435.3	11880	328.041	943.141	620.269
2437.38	11887	63.6787	753.953	696.075
2439.47	11885	-139.944	607.078	753.3
2441.55	11889	-4.83906	644.641	654.938
2443.63	11893	-145.881	742.547	895.894
2445.71	11884	80.5441	828.422	754.162
2447.79	11886	-36.6559	806.422	850.162
2449.87	11897	50.4225	968.656	925.95
2451.95	11883	-34.4381	780.266	821.55
2454.03	11887	-194.743	606.703	808.181
2456.11	11889	-285.803	685.906	979.875
2458.19	11892	5.56	741.203	741.825
2460.27	11896	-146.603	557.375	709.894
2462.35	11897	-176.581	994.156	1180.58
2464.44	11885	-295.517	682.031	985.763
2466.52	11883	-342.953	887.656	1240.95
2468.6	11892	-18.9867	912.281	939.094
2470.68	11896	-125.49	806.094	939.412
2472.76	11893	22.1758	920.719	906.094
2474.84	11894	94.8045	1082.67	996.169
2476.92	11892	83.9856	1225.05	1150.65
2479	11893	-153.302	1186.66	1351.22
2481.08	11886	-330.18	1031.42	1373.04
2483.16	11890	167.486	1514.94	1358.78
2485.25	11889	-436.666	1363.17	1814.96
2487.33	11887	-92.4302	1459.91	1565.38
2489.41	11894	-233.766	1463.45	1711.48
2491.49	11904	-286.743	1302.78	1602.88
2493.57	11886	-83.0839	1464.34	1560.43
2495.65	11896	-437.124	1365.09	1817.36
2497.73	11898	-184.886	1301.7	1499.08
2499.82	11911	4.98531	1483.67	1491.11
2501.9	11900	-359.712	1119.62	1491.77
2503.98	11912	-104.492	1330.8	1447.35
2506.06	11901	-199.477	1275.45	1487.33
2508.14	11914	-216.785	1259.48	1488.67
2510.22	11906	-79.4959	1420.02	1512.11
2512.31	11915	-451.99	1298.89	1765.59
2514.39	11912	-305.566	1217.97	1536.34
2516.47	11910	-317.27	1217.33	1547.49
2518.55	11907	-349.079	1156.92	1518.66
2520.63	11893	-444.779	1201.73	1660.35
2522.72	11895	-220.89	1587.3	1823.38
2524.8	11907	-395.559	1229.22	1638.43
2526.88	11890	-374.914	1137	1524.62
2528.96	11894	-460.589	1149.5	1623.62
2531.04	11890	-339.599	1525.09	1880.36
2533.13	11898	-568.081	1385.75	1970.25
2535.21	11876	-325.469	1090.98	1428.36
2537.29	11896	-385.595	1083.52	1481.46
2539.37	11895	-318.692	1016.17	1346.08
2541.46	11896	-405.598	1006.67	1424.14
2543.54	11905	-569.662	1067.41	1650.83
2545.62	11906	-376.93	953.359	1341.47
2547.7	11909	-262.355	1020	1293.13
2549.79	11897	-226.87	857.406	1093.39
2551.87	11909	-701.095	574.25	1286.06
2553.95	11908	-443.492	580.094	1032.19
2556.04	11901	-33.1203	904.562	945.562
2558.12	11907	-604.114	535.906	1149.6
2560.2	11910	-353.43	813.234	1176.47
2562.29	11897	-250.69	939.328	1200.02
2564.37	11904	-404.366	665.891	1079.25
2566.45	11904	-489.911	853.078	1354.28
2568.54	11898	-383.567	613.969	1005.92
2570.62	11912	-473.936	741.203	1225.35
2572.7	11909	-397.34	646.922	1053.04
2574.79	11892	-590.103	691.75	1292.62
2576.87	11892	-94.3111	771.953	873.544
2578.95	11904	-391.452	417.172	815.419
2581.04	11888	-279.618	486.109	772.162
2583.12	11889	-396.295	284.516	686.531
2585.21	11900	-258.101	614.969	880.406
2587.29	11898	-463.014	295.109	764.494
2589.37	11893	-83.6548	423.75	511.669
2591.46	11903	-430.357	298.109	734.588
2593.54	11904	-353.128	69.3594	426.038
2595.63	11896	-680.733	-96.7031	588.938
2597.71	11886	-67.8164	329.625	400.781
2599.8	11888	-424.617	126.297	555.544
2601.88	11893	-61.5653	221.469	285.413
2603.97	11902	-257.417	286.859	548.85
2606.05	11903	-413.129	37.8438	454.763
2608.14	11914	-251.047	-183.031	68.5875
2610.22	11918	-435.276	-129.391	308.456
2612.31	11913	-544.825	-267.406	279.75
2614.39	11896	-257.828	0.328125	260.325
2616.48	11893	-298.461	-287.547	11.0062
2618.56	11898	-428.147	-153.312	277.144
2620.65	11892	-258.718	-149.312	110.325
2622.73	11906	-163.083	-234.688	-72.2063
2624.82	11888	-6.84828	-421.656	-418.294
2626.91	11896	-252.532	-55.1406	199.05
2628.99	11897	-27.4255	-324.609	-299.681
2631.08	11898	-271.833	-125.5	147.562
2633.16	11908	-109.907	-304.844	-196.575
2635.25	11905	131.399	-45.3906	-178.275
2637.34	11912	76.4992	33.6406	-43.2188
2639.42	11907	-16.3639	-154.125	-138.919
2641.51	11921	-5.59062	-181.859	-177.75
2643.6	11916	384.429	353.266	-31.425
2645.68	11914	251.803	238.453	-13.4625
2647.77	11924	672.163	598.922	-73.8562
2649.86	11912	1047.47	869.328	-179.644
2651.94	11923	697.974	1057.88	362.925
2654.03	11948	885.283	1035.69	151.669
2656.12	11941	619.907	1019.38	402.825
2658.21	11947	1050.5	1307.59	259.256
2660.29	11955	1527.31	1705.23	179.419
2662.38	11949	1432.56	1754.08	324.225
2664.47	11959	1340.77	1621.7	283.294
2666.56	11939	1620.66	1895.03	276.675
2668.64	11945	1849.26	2306.78	461.362
2670.73	11953	1907.23	2023.33	117.075
2672.82	11924	1740.51	2239.95	503.644
2674.91	11938	1723.23	1938.86	217.444
2677	11942	1932.93	2667.62	740.869
2679.09	11946	1894.23	2414.52	524.662
2681.17	11935	1944.83	2785.62	847.856
2683.26	11930	2267.51	2797.19	534.131
2685.35	11929	2360.87	3281.69	928.556
2687.44	11929	2219.27	3378.11	1168.58
2689.53	11943	2325.73	3699.42	1385.23
2691.62	11944	2267.15	3994.08	1741.44
2693.71	11936	2401.41	4479.08	2095.12
2695.8	11926	2727.42	4844.39	2134.76
2697.89	11957	2636.5	5216.22	2601.39
2699.98	11945	2603.58	5649.03	3071.04
2702.07	11946	2788.62	6150.91	3390.54
2704.16	11933	2863.69	6598.19	3765.88
2706.25	11974	3129.84	7579.03	4486.58
2708.34	11956	2861.77	7925.3	5106.08
2710.43	11977	2921.5	8321.31	5445.19
2712.52	11972	3038.3	9188.5	6201.88
2714.61	11958	2727.82	9429.77	6758.27
2716.7	11991	2888.02	10535.5	7711.74
2718.79	11982	3250.7	11549.7	8368.72
2720.89	11999	3305.15	12376.3	9147.36
2722.98	11977	3341.22	12831.8	9570.28
2725.07	11988	3323.12	13884.3	10649.9
2727.16	11961	2886.37	14336.9	11546.8
2729.25	11957	3211.09	15144.3	12033.5
2731.34	11955	2625.43	15721	13205.6
2733.44	11944	3028.99	16684.8	13770.6
2735.53	11933	3057.07	17571.1	14636
2737.62	11934	2959.01	18275	15444.7
2739.71	11941	3105.23	19128.5	16157.9
2741.81	11936	3151.26	19718.4	16706.4
2743.9	11945	3374.57	20903.8	17676.5
2745.99	11939	3201.13	21397.2	18348.9
2748.08	11945	3090.42	22063.4	19132.4
2750.18	11936	3188.25	23205	20185
2752.27	11954	3502.94	23881.4	20549.7
2754.36	11962	3714.74	24960.5	21424.3
2756.46	11993	3055.77	25735.8	22870.6
2758.55	11986	3382.6	26661.9	23474.9
2760.65	12005	3395.71	27427.3	24233.5
2762.74	12043	3213.17	28238.4	25235.5
2764.84	12063	3078.11	29097.7	26238.3
2766.93	12074	3041.43	30332.8	27520.7
2769.02	12065	3249.36	31579.4	28568.1
2771.12	12063	3083.38	33250.2	30420.3
2773.21	12054	3250	34843	31858.5
2775.31	12031	3115.65	37091.2	34261
2777.41	12052	3448.59	39594.2	36449.3
2779.5	12045	3493.18	42403.5	39237.3
2781.6	12059	2958.79	45249.2	42645.8
2783.69	12057	2679.72	47231.4	44926.1
2785.79	12050	2614.03	49057.1	46833.4
2787.89	12035	2515.81	51080.3	48972.6
2789.98	12024	3286.01	52602.8	49731.2
2792.08	12003	2943.73	53602.9	51084.9
2794.17	11984	3292.3	54505.8	51643.9
2796.27	11970	3295.11	55406.2	52549.1
2798.37	11963	2975.83	55184.1	52647
2800.47	11956	2918.01	56027.2	53555.5
2802.56	11940	3222.13	56353.2	53577.5
2804.66	11947	3070.8	56437.7	53815.4
2806.76	11937	2896.54	56355.8	53908.4
2808.86	11920	2813.89	56362.1	53998.2
2810.96	11926	3453.65	56014.2	53002.2
2813.05	11925	3068.43	55457.9	52829.7
2815.15	11920	3466.32	55035.1	52002.1
2817.25	11922	3141.78	53764.8	51048.4
2819.35	11921	3211.42	53319.9	50529.6
2821.45	11918	2922.31	52398	49891.4
2823.55	11927	2947.79	51842.5	49305.6
2825.65	11908	2808.94	51629.1	49230.4
2827.75	11922	3222.73	51938.9	49125.5
2829.85	11922	3297.26	52218.5	49332.4
2831.95	11921	3816.97	52668.6	49262.2
2834.05	11919	3621.73	52661.5	49451.9
2836.15	11924	3189.37	51782.4	49001.4
2838.25	11913	3706.27	51452.5	48147.5
2840.35	11936	3597.05	50427.8	47224.3
2842.45	11936	3130.59	49327.2	46584.8
2844.55	11923	3512.74	47792.1	44651.4
2846.65	11952	3450.74	47054.9	43970.6
2848.75	11941	3106.63	45459.9	42709.1
2850.86	11941	2898.24	43636.8	41080.9
2852.96	11939	2878.04	41954.5	39404.9
2855.06	11938	2783.65	40255.6	37786.8
2857.16	11969	2642.51	38306.3	35963.5
2859.27	11954	2388.71	36677.5	34576.9
2861.37	11955	2596	34892.6	32568
2863.47	11980	2435.63	33474.9	31300.1
2865.58	11964	2153.9	31269	29359.8
2867.68	11980	1788.68	29792.4	28239.1
2869.78	11980	1919.36	27762.4	26060.2
2871.89	12007	1648.28	26401.3	24961
2873.99	11992	1463.4	24726	23458.1
2876.09	12000	1772.72	23305.2	21713.5
2878.2	12022	1175.3	20992.5	19983.8
2880.3	12010	1172.69	19652.1	18634.7
2882.41	12028	1127.9	18252.7	17268.7
2884.51	12013	864.821	16285.9	15550.7
2886.62	12049	1182.27	14968.2	13901.8
2888.72	12034	762.236	12428.5	11764.3
2890.83	12051	538.25	11426	10979.2
2892.94	12050	770.953	9577.73	8880.79
2895.04	12070	703.265	8617.75	7980.99
2897.15	12093	510.786	6120	5656.35
2899.26	12142	78.9938	4211.64	4167.38
2901.36	12159	118.656	2503.06	2404.44
2903.47	12268	112.002	1506.72	1406.44
2905.58	12363	-445.227	-587.562	-143.531
2907.68	12589	-803.43	-2048.67	-1255.71
2909.79	12846	-423.818	-3400.25	-3001.44
2911.9	13036	-270.915	-4110.47	-3871.82
2914.01	13033	-80.74	-3291.06	-3237.3
2916.12	12882	1056.83	-2019.47	-3102.15
2918.23	12744	1354.89	275.953	-1088.01
2920.33	12643	2331.4	3898.59	1580.36
2922.44	12608	3522.88	8420.95	4939.24
2924.55	12687	4259.44	13319.3	9135.99
2926.66	12801	4292.9	19273.7	15106.7
2928.77	12969	3737.52	24645	21083.2
2930.88	13176	2967.34	30663.8	27929.2
2932.99	13270	2271.52	37222.5	35244.7
2935.1	13277	1743.64	47409.2	46049.3
2937.21	13129	782.539	57423.8	57117.2
2939.32	12981	167.684	72184.6	72622.1
2941.44	12903	-457.277	90342.4	91562.7
2943.55	12896	358.819	112208	112790
2945.66	13009	-1026.8	135587	137762
2947.77	13250	-2496.89	157327	161167
2949.88	13565	-4595.01	174415	180514
2952	13891	-7851.72	186561	196046
2954.11	14126	-10592	195090	207410
2956.22	14088	-13430.3	199682	214903
2958.34	13769	-13373.8	204053	219253
2960.45	13523	-12340.4	205299	219469
2962.56	13425	-11363.8	204015	217188
2964.68	13527	-12437	197127	211325
2966.79	13825	-10309.7	193544	205567
2968.9	14567	-10105.9	188947	200726
2971.02	16129	-6822.19	192480	200978
2973.13	18560	-4195.35	193902	199762
2975.25	19785	-2603.32	198207	202498
2977.36	18863	-1498.08	203368	206587
2979.48	17018	1992.47	208212	207952
2981.6	16337	3065.73	215386	214104
2983.71	16167	3792.34	220514	218543
2985.83	16141	5009.38	226969	223825
2987.95	16011	5715.65	234256	230461
2990.06	15711	3560.46	242208	240653
2992.18	15478	400.872	255518	257261
2994.3	15604	-1766.99	271148	275208
2996.42	15967	-2997.26	292665	298147
2998.53	16338	-7225.22	317937	327895
3000.65	16458	-5973.26	344449	353367
3002.77	16103	-6549.57	376878	386650
3004.89	16320	-7866.22	398105	409383
3007.01	17330	-9108.02	423474	436217
3009.13	18911	-9876.18	443748	457436
3011.25	19244	-11256.5	461331	476559
3013.37	18229	-9453.4	483551	497148
3015.49	17492	-10495.2	509077	523938
3017.61	17397	-8300.3	538265	551158
3019.73	17436	-6339.34	574366	585585
3021.85	17195	-2574.56	602364	610022
3023.97	16864	-2340.14	632613	640288
3026.09	16290	-5412.8	646309	657198
3028.22	15898	-7666.41	652675	665891
3030.34	15489	-13158.1	648272	666988
3032.46	14976	-18139.8	629915	653501
3034.58	14473	-20920.9	604978	631158
3036.71	14090	-21776.6	567683	594413
3038.83	13734	-22983.4	526874	554478
3040.95	13613	-23145.3	487320	514755
3043.08	13522	-21651.2	446279	471862
3045.2	13421	-23003.5	407877	434501
3047.32	13300	-22760.3	380181	406328
3049.45	13151	-19966.6	360903	384071
3051.57	13011	-18428.3	344237	365713
3053.7	12926	-15757.9	337707	356435
3055.83	12899	-16259.5	330273	349445
3057.95	13000	-13979.4	323305	340119
3060.08	13229	-14394.8	322763	339991
3062.2	14024	-13670.6	316262	332705
3064.33	15153	-12115.3	314499	329359
3066.46	15478	-12881	308472	324053
3068.58	14774	-12841.4	304078	319583
3070.71	14077	-11347.1	300133	314098
3072.84	13964	-7458.77	297727	307750
3074.97	14212	-4762.84	297455	304758
3077.1	14483	-3940.15	292664	299097
3079.23	14461	-2841.52	284834	290093
3081.36	14091	-817.811	276505	279653
3083.48	13582	691.437	264227	265750
3085.61	13124	2480.66	249646	249243
3087.74	12810	3489.71	228548	226949
3089.87	12589	2509.48	206466	205670
3092.01	12494	1589.32	181488	181410
3094.14	12389	1099.82	158082	158301
3096.27	12330	770.69	137731	138111
3098.4	12265	391.054	116997	117585
3100.53	12211	791.216	101881	101940
3102.66	12189	818.202	84388.4	84272.5
3104.8	12181	399.187	72801.7	73010.9
3106.93	12145	344.598	59428.7	59580.6
3109.06	12139	-991.198	49058.9	50470.7
3111.19	12113	-1087.31	37554.4	38966.4
3113.33	12120	-2112.75	26310.2	28661.8
3115.46	12101	-1310.06	18009.4	19481.8
3117.6	12083	-291.672	10934.2	11320.2
3119.73	12094	249.978	5601.59	5396.59
3121.87	12069	783.864	2627.06	1858.69
3124	12085	720.986	-1057.47	-1793.4
3126.14	12070	477.702	-3097.97	-3605.72
3128.27	12047	187.937	-5056.28	-5288.29
3130.41	12042	-132.794	-4750.72	-4656.73
3132.55	12057	-824.995	-3540.59	-2738.42
3134.68	12050	-792.303	439.031	1241.68
3136.82	12053	-71.0066	4932.91	5045.96
3138.96	12021	-168.132	9843.38	10095.6
3141.1	12029	-652.102	14946.6	15729.8
3143.23	12025	-179.617	21187	21546.2
3145.37	12024	1207.3	29017.1	28043.5
3147.51	12031	1111.9	36967.9	36157.3
3149.65	12033	1539.8	44965.3	43790.4
3151.79	12005	-941.924	48598.6	49956.8
3153.93	12007	-2967.48	50408.6	53824.6
3156.07	12011	-5371.39	51266.7	57114.1
3158.21	12017	-5457.21	56644	62623.1
3160.35	12001	-3927.87	66262.2	70779.9
3162.49	11980	-2043.23	81557.6	84303.3
3164.64	11986	-166.558	100635	101649
3166.78	11975	1307.3	119004	118686
3168.92	11962	-173.922	134823	136131
3171.06	11971	-2033.11	146853	150137
3173.2	11958	-2269.49	152376	155945
3175.35	11964	-3730.88	154268	159326
3177.49	11954	-3340.28	155510	160185
3179.64	11954	-1746.86	154528	157588
3181.78	11944	-818.22	150436	152525
3183.92	11947	-840.889	143074	145124
3186.07	11952	-1156.3	131233	133502
3188.22	11948	-3387.82	116216	120609
3190.36	11932	-6411.38	101138	108453
3192.51	11927	-8221.68	89334.6	98376.1
3194.65	11935	-6993.53	79196.2	86914
3196.8	11940	-5312.15	71796.8	77756.9
3198.95	11935	-4525.3	64669.4	69776.2
3201.09	11925	-2268.99	59573.7	62362.4
3203.24	11917	-2027.11	52411.8	54896.4
3205.39	11926	-2199.41	48201.1	50824.1
3207.54	11921	-1930.03	43884.7	46199.7
3209.69	11915	-1396.18	39885.5	41628.6
3211.84	11921	-1589.89	36029.1	37935.1
3213.99	11905	-1060.18	33638.2	34990
3216.14	11909	-1726.82	29429.2	31417.9
3218.29	11907	-1780.88	27244.1	29268.9
3220.44	11903	-1793.6	25860.7	27886.7
3222.59	11894	-1543.95	24216.1	25976.6
3224.74	11893	-1801.51	23631.6	25646.8
3226.89	11900	-532.728	24131.2	24871.1
3229.04	11910	-838.255	23386.9	24428.7
3231.2	11896	-451.206	24597.9	25259.6
3233.35	11882	-485.834	25026	25726.2
3235.5	11898	329.632	25809.5	25694
3237.66	11883	-917.894	25473.3	26613
3239.81	11895	-93.6778	25550.9	25860
3241.97	11890	207.468	25481.2	25486.1
3244.12	11889	432.733	24218.8	23985.9
3246.27	11893	587.618	23219.1	22821.7
3248.43	11886	719.428	20397.2	19843.1
3250.59	11893	136.713	19077.8	19100.3
3252.74	11887	454.478	17361.8	17049.4
3254.9	11887	864.71	15868.8	15130.2
3257.06	11887	556.343	14348	13907.6
3259.21	11891	894.931	13539	12750.3
3261.37	11887	628.539	11930	11396.4
3263.53	11882	1040.07	11269.9	10315.8
3265.69	11894	755.699	9876.16	9197.1
3267.85	11894	312.816	8743.59	8501.62
3270.01	11887	699.539	7699.16	7058.44
3272.17	11885	627.936	7573.69	7004.12
3274.33	11884	1507.14	6473.36	5007.96
3276.49	11880	1202.19	6533.31	5375.92
3278.65	11886	1481.87	6421.95	4981.59
3280.81	11888	1117.85	5649.59	4569.83
3282.97	11883	970.802	5406.45	4472.92
3285.13	11903	1637.45	5356.22	3750.02
3287.29	11881	1620.42	5213.22	3622.99
3289.46	11890	2003.49	5311.84	3336.15
3291.62	11888	1200.63	3939.16	2761.54
3293.78	11888	1473.53	3967.94	2515.37
3295.95	11876	589.875	3913.75	3351.81
3298.11	11879	1166.89	4394.78	3255.02
3300.28	11874	1191.03	3941.25	2773.33
3302.44	11873	74.5698	3188.78	3140.38
3304.61	11878	414.482	3611.25	3223.63
3306.77	11887	213.851	3295.38	3107.42
3308.94	11881	13.0838	1564.84	1564.8
3311.11	11873	174.673	2316.47	2159.79
3313.27	11875	224.249	925.531	707.175
3315.44	11873	-11.1228	395.969	410.513
3317.61	11874	-467.395	-161.156	308.812
3319.78	11881	652.184	417.531	-236.625
3321.95	11879	959.365	1157.5	199.8
3324.12	11883	257.818	372.281	115.425
3326.28	11890	-425.886	159.594	590.4
3328.45	11873	378.219	1119.03	747.037
3330.63	11881	346.867	1121.59	781.237
3332.8	11885	-460.954	1930.5	2411.55
3334.97	11879	-77.8431	2363.22	2461.57
3337.14	11890	292.455	2815.81	2544.56
3339.31	11879	-55.4512	3000.47	3081.6
3341.48	11882	450.905	4374	3956.06
3343.66	11882	336.641	4540.69	4239.38
3345.83	11888	424.078	5435.09	5053.12
3348	11884	-878.812	4902.47	5829.86
3350.18	11898	-87.6259	5387.75	5521.39
3352.35	11891	123.331	5605.44	5528.17
3354.53	11895	86.7575	5914.19	5876.4
3356.7	11896	-174.465	5148.22	5367.41
3358.88	11885	-567.116	4892.34	5505.34
3361.05	11881	-163.352	4107.78	4307.02
3363.23	11902	-191.124	4471.59	4701.9
3365.41	11902	-234.341	3424.5	3689.59
3367.59	11903	43.7944	3776.75	3764.32
3369.76	11896	-322.772	4515.66	4879.09
3371.94	11898	688.226	4613.81	3958.57
3374.12	11904	935.439	4494.47	3588.94
3376.3	11903	-36.7353	5522.31	5605.76
3378.48	11908	467.717	4283.75	3848.1
3380.66	11898	5.19094	5599.34	5641.16
3382.84	11903	263.894	5607.81	5388.83
3385.02	11906	843.703	6412.53	5615.62
3387.2	11908	98.1041	6947.78	6907.24
3389.38	11908	904.22	7389.12	6539.4
3391.57	11918	234.277	8111.59	7943.51
3393.75	11919	-120.031	9184.28	9382.5
3395.93	11915	25.4894	8418.19	8463.22
3398.12	11909	1088.1	10514.1	9505.24
3400.3	11914	152.944	10879.3	10816.5
3402.48	11917	1366.16	11871	10593.1
3404.67	11922	224.333	12767.2	12648.2
3406.85	11928	672.386	14428.6	13871.8
3409.04	11941	1076.23	15725.9	14772.8
3411.23	11929	28.8053	16421.7	16530.6
3413.41	11929	916.352	18782.9	18016.7
3415.6	11937	1418.73	21918.8	20672.3
3417.79	11939	514.407	22118.2	21785.3
3419.98	11942	254.647	24467.1	24415.9
3422.16	11950	-578.609	26128.4	26931.4
3424.35	11961	1843.04	29985.7	28379.2
3426.54	11956	137.019	31168.5	31292.2
3428.73	11962	1664.19	34278.4	32888.2
3430.92	11975	1180.91	36689.8	35807.3
3433.11	11992	1019.85	39283	38584.7
3435.3	11976	1261.36	40447.5	39515.4
3437.5	11988	1629.4	41907.6	40616.7
3439.69	12005	1447.97	44215.3	43126.8
3441.88	12002	1800.34	45102.2	43665.8
3444.07	12025	1932.4	47529.2	45979.9
3446.27	12025	2263.63	47752.2	45870.8
3448.46	12039	1822.99	49251.2	47826.8
3450.66	12060	2634.37	48822.5	46576.2
3452.85	12072	4519.05	52144	48025.2
3455.05	12115	3365.54	50502.8	47533.4
3457.24	12126	4820.49	52094.7	47671.4
3459.44	12165	4956.07	51600.3	47036.2
3461.63	12196	6337.55	52040.7	46087.2
3463.83	12248	6148.92	50658.6	44883.7
3466.03	12314	5786.27	50150.2	44736.8
3468.23	12368	5431.45	50314.7	45260.4
3470.43	12446	5026.49	46670.9	41994.3
3472.62	12516	6049.75	46603.1	40894.2
3474.82	12584	5723.46	44762.2	39366.8
3477.02	12647	5136.2	42226.2	37401.6
3479.22	12656	4389.34	40596.5	36511.4
3481.43	12630	3687.47	38953.9	35562.8
3483.63	12621	4343.32	36960.2	32891
3485.83	12572	5134.09	36043.4	31169
3488.03	12530	4592.71	34091.2	29746.4
3490.23	12491	5397.34	33403.5	28241.5
3492.44	12428	5233.13	31207.8	26192.9
3494.64	12391	4172.42	28348.7	24379.4
3496.84	12321	4057.76	26805.5	22938.9
3499.05	12266	4899.86	25598.5	20872.6
3501.26	12236	3196.83	22371.4	19335.7
3503.46	12187	3870.84	20889.2	17161.4
3505.67	12182	3095.05	17929.2	14958.8
3507.87	12142	3065.47	18217.6	15279.5
3510.08	12116	2321.5	15111.2	12897.2
3512.29	12119	3679.86	14618	11030
3514.5	12099	1805.54	11959.8	10239.6
3516.71	12102	1254.2	10319.5	9141.45
3518.91	12106	2360.93	9936.44	7639.16
3521.12	12085	1699.75	8499.78	6857.17
3523.33	12097	560.798	6590.16	6080.02
3525.54	12106	-19.9897	6134.28	6205.99
3527.76	12116	773.627	4854.84	4115.51
3529.97	12118	365.285	4127.66	3793.99
3532.18	12158	419.488	3294.16	2898.82
3534.39	12195	181.759	3621.94	3469.09
3536.61	12236	873.493	1731	864.713
3538.82	12305	123.578	1593.56	1482.34
3541.03	12355	-241.298	1642.84	1899.97
3543.25	12429	-148.493	-90.4062	58.575
3545.46	12471	-11.0241	-309.156	-300.638
3547.68	12517	-836.025	362.156	1208.25
3549.89	12519	-100.004	-262.625	-163.988
3552.11	12534	-38.0784	-628.281	-595.162
3554.33	12484	-723.431	564.781	1299.04
3556.55	12464	-949.317	-135.469	820.688
3558.76	12413	169.427	-69.875	-241.312
3560.98	12343	265.779	349.562	84.4875
3563.2	12321	-286.168	1362.88	1662.9
3565.42	12253	212.043	2127.12	1931.17
3567.64	12225	-1018.4	936.438	1971.26
3569.86	12198	400.619	3709.56	3336.75
3572.08	12165	1156.18	3807.5	2673.6
3574.3	12142	1615.36	5570.03	3987.9
3576.53	12131	970.663	4653.75	3714.04
3578.75	12115	1549.41	6720.97	5215.01
3580.97	12104	2154.41	8812.91	6714.45
3583.2	12092	2637.6	8077.88	5485.99
3585.42	12099	2016.81	9284.62	7328.89
3587.65	12075	2319.45	10397.7	8146.12
3589.87	12078	3121.33	9783.84	6718.5
3592.1	12067	2404.48	10749.5	8415.11
3594.32	12064	3084.58	12038.8	9029.51
3596.55	12065	3336.11	11715.2	8449.46
3598.78	12043	2385.07	11037.8	8725.39
3601.01	12053	1873.09	11105	9309.53
3603.23	12054	2400.14	10725.6	8395.39
3605.46	12034	1962.69	10816.2	8927.96
3607.69	12034	1057.81	9837.62	8853.6
3609.92	12041	1468.64	10457.8	9064.65
3612.15	12022	959.368	10153.5	9271.42
3614.38	12016	-118.869	8620.16	8812.46
3616.62	12011	145.659	8969.06	8897.55
3618.85	12020	-148.661	8345.19	8565.22
3621.08	11984	-618.715	8126.78	8818.99
3623.31	12004	-247.326	9022.62	9347.85
3625.55	11975	-885.625	8906.62	9874.54
3627.78	11976	-253.697	8973.56	9304.8
3630.02	11968	-327.202	8064.34	8462.06
3632.25	11965	-464.112	8808.22	9350.25
3634.49	11961	319.598	8412.16	8160.56
3636.72	11938	-558.705	8600.69	9236.36
3638.96	11948	298.843	9096.62	8871.71
3641.2	11942	79.7644	8999.78	8994.97
3643.44	11927	1156.99	9187.97	8098.46
3645.68	11916	-365.764	9339.28	9786.6
3647.91	11930	-276.839	10597.3	10965.6
3650.15	11932	108.666	9124.81	9091.91
3652.39	11922	-105.637	9912.75	10102.6
3654.64	11913	-276.156	9609.84	9969.08
3656.88	11907	1598.94	10696.9	9174.45
3659.12	11909	1316.04	11013.5	9778.95
3661.36	11900	634.811	10817.3	10268.1
3663.6	11894	-308.066	10786.8	11188
3665.85	11896	1547.94	12801.1	11347.7
3668.09	11893	437.114	11852.4	11511.2
3670.34	11899	503.105	12638.7	12237.6
3672.58	11905	2133.56	13952.6	11918.3
3674.83	11885	316.012	12306	12090.7
3677.07	11896	1477.66	13443.8	12066.7
3679.32	11888	2294.22	15369.9	13185.6
3681.57	11890	2245.04	16228.1	14100.6
3683.82	11880	2496.49	15772.1	13387.2
3686.06	11881	3530.43	16868.8	13450.5
3688.31	11858	3443.74	17156.8	13828.3
3690.56	11872	3437	17888.8	14573.3
3692.81	11876	4668.87	19026.6	14478.4
3695.06	11866	3712.56	18457.6	14868.9
3697.32	11880	4090.55	18225.8	14254
3699.57	11877	1833.88	16029.7	14315.1
3701.82	11875	2699.37	16201.6	13615.7
3704.07	11882	1884.65	15606.9	13837.5
3706.33	11869	2052.99	15428.6	13488
3708.58	11875	579.966	13494.8	13023.4
3710.84	11874	1388.2	13104.1	11814.4
3713.09	11856	1318.24	12620.9	11397.7
3715.35	11878	211.154	11998.6	11886.5
3717.6	11875	872.496	11862.4	11082.3
3719.86	11858	652.607	10329.7	9758.4
3722.12	11867	-266.749	9489.09	9837.83
3724.38	11868	164.74	9612.19	9526.84
3726.64	11872	-618.866	8707.31	9404.55
3728.9	11864	709.617	9409	8772.49
3731.16	11866	371.902	7593.16	7281.94
3733.42	11872	-142.605	8084.12	8295.86
3735.68	11867	649.382	8591.22	8008.58
3737.94	11872	156.388	6720.09	6618.86
3740.2	11871	398.986	7863.78	7527.52
3742.46	11872	166.278	6765.91	6655.09
3744.73	11865	127.908	5737.53	5656.76
3746.99	11866	173.724	6076.72	5952.6
3749.26	11868	-288.631	5355.69	5691.75
3751.52	11875	1056.3	5135.84	4113.83
3753.79	11862	936.894	6056.12	5162.25
3756.05	11856	1367.21	5470.41	4137.67
3758.32	11867	241.583	4901.44	4699.01
3760.59	11860	521.505	4298.16	3808.39
3762.86	11866	-134.468	4436.75	4609.63
3765.13	11879	363.932	3896.78	3562.54
3767.39	11863	598.07	3487.69	2913.9
3769.66	11864	-140.746	3726.44	3899.68
3771.94	11868	573.442	3275.97	2725.24
3774.21	11869	868.628	3769.62	2925.38
3776.48	11865	-0.191562	2946.06	2971.01
3778.75	11870	449.553	2271.31	1837.07
3781.02	11870	760.99	3830.69	3095.49
3783.3	11868	499.989	3095.16	2616.98
3785.57	11863	249.295	2522.34	2292.15
3787.85	11865	325.035	2283.03	1974.45
3790.12	11865	257.813	2164.84	1923.06
3792.4	11882	242.257	2480.31	2256.86
3794.67	11886	73.2981	1740.56	1681.28
3796.95	11874	5.38297	1023.78	1026.96
3799.23	11867	133.182	1369.7	1246.91
3801.51	11873	7.20547	1634.44	1640.91
3803.79	11876	513.529	1849.06	1346.76
3806.07	11868	338.943	1754.97	1427.92
3808.35	11855	762.487	736.438	-26.2687
3810.63	11870	344.062	1202.61	865.763
3812.91	11878	-61.9994	806.031	875.325
3815.19	11867	-239.301	762.047	1009.76
3817.47	11872	77.3189	636.266	563.644
3819.76	11869	406.921	1142.36	741.619
3822.04	11872	-199.268	238.094	441.038
3824.32	11872	453.614	1123.16	675.169
3826.61	11858	-33.8803	614.781	654.112
3828.9	11878	12.1681	993.844	989.925
3831.18	11867	22.7448	-81.25	-104.869
3833.47	11876	-115.115	297.016	415.594
3835.76	11872	-317.864	-297.188	20.85
3838.04	11872	315.817	222.625	-93.975
3840.33	11873	496.713	328.328	-169.8
3842.62	11874	-427.772	78.0156	510.038
3844.91	11868	18.0736	-13.7031	-32.0438
3847.2	11868	-166.862	-157.453	9.4875
3849.5	11879	285.073	179.219	-106.744
3851.79	11860	-201.555	355.625	561.862
3854.08	11869	-161.224	215.578	379.969
3856.37	11879	-116.288	490.203	611.588
3858.67	11865	-446.088	274.141	726.281
3860.96	11873	-62.3761	706.531	775.369
3863.26	11873	80.3955	765.594	690.956
3865.55	11858	-663.929	282.047	953.925
3867.85	11865	-743.513	736.828	1492.78
3870.15	11867	-219.806	484.562	710.287
3872.44	11872	-166.209	1291.97	1470.43
3874.74	11873	-691.055	452.219	1152.88
3877.04	11869	-752.778	996.578	1764.06
3879.34	11873	-1488.11	277.312	1780.26
3881.64	11873	-671.27	1039.19	1724.83
3883.94	11881	-1150.22	1123.22	2292.54
3886.24	11867	-1264.2	763.391	2044.63
3888.55	11875	-692.308	1134.55	1842.21
3890.85	11873	-1382.34	1266.36	2670.96
3893.15	11881	-918.085	1296.77	2233.46
3895.46	11870	-383.921	2071.33	2475.88
3897.76	11887	-1195.98	1666.36	2886.39
3900.07	11861	-715.181	1973.53	2711.31
3902.37	11874	-1183.47	1503.42	2709.47
3904.68	11878	-795.718	2110.58	2930.72
3906.99	11868	-665.277	2207.23	2896.65
3909.3	11866	-1019.96	2415.14	3463.97
3911.6	11871	-730.086	2661.17	3419.76
3913.91	11874	-532.987	2598.22	3157.52
3916.22	11871	-856.498	2632.66	3518.48
3918.53	11879	-722.166	2941.84	3694.8
3920.85	11882	-288.178	2976.92	3292.54
3923.16	11882	-249.347	3285.64	3564.69
3925.47	11873	-612.09	2764.61	3405.07
3927.78	11867	-467.681	2888.16	3384.04
3930.1	11864	-466.135	3013.41	3508.78
3932.41	11887	-819.993	3034.25	3886.63
3934.73	11873	-691.94	3012.34	3735.41
3937.04	11875	-502.904	3091.55	3624.66
3939.36	11887	-12.8116	2977.55	3015.49
3941.68	11874	-415.093	3091.39	3535.95
3943.99	11877	-131.829	3173.27	3332.87
3946.31	11874	-122.098	2721.5	2867.49
3948.63	11860	-235.256	2727.55	2987.7
3950.95	11872	-444.607	2834.83	3306.99
3953.27	11876	166.482	2763.36	2618.7
3955.59	11871	-678.323	2268.27	2971.35
3957.92	11890	-296.92	2599.88	2921.14
3960.24	11888	-129.041	2314.14	2463.71
3962.56	11871	-213.447	2254.3	2488.48
3964.89	11877	386.894	2289.41	1918.5
3967.21	11880	-231.667	1618.19	1865.4
3969.54	11869	-87.223	1514.31	1614.99
3971.86	11890	-54.3905	966.797	1029.77
3974.19	11870	-78.1177	1176.72	1265.38
3976.52	11870	-372.573	717.281	1099.01
3978.84	11876	-348.765	744.25	1102.2
3981.17	11883	-97.1678	669.75	773.362
3983.5	11864	-256.366	469.812	732.281
3985.83	11892	261.623	411.562	151.2
3988.16	11905	-33.9538	505.562	544.05
3990.49	11878	-98.7786	220.234	321.694
3992.83	11887	-259.939	-51.0938	210.6
3995.16	11872	169.64	9.64062	-161.344
3997.49	11878	-32.6139	143.859	177.956
3999.83	11880	130.188	68.5312	-62.175
4002.16	11890	-166.389	-275.125	-109.65
4004.5	11866	46.8703	239.688	194.438
4006.83	11867	15.3186	11.9531	-3.39375
4009.17	11871	-77.3152	287.922	368.306
4011.51	11876	112.547	93.6562	-19.05
4013.85	11881	-25.0192	507.078	536.569
4016.19	11877	-310.38	7.40625	320.456
4018.53	11891	5.18281	489.922	488.812
4020.87	11889	-6.78687	311.984	321.45
4023.21	11889	-56.6842	364.297	424.519
4025.55	11889	-316.62	103.078	423.225
4027.89	11879	87.1995	732.719	650.944
4030.24	11878	161.642	742.25	585.487
4032.58	11876	-226.301	687.656	921.638
4034.92	11886	104.724	1038.78	941.906
4037.27	11863	-37.217	935.812	981.206
4039.62	11881	-107.355	1127.44	1245.17
4041.96	11878	185.115	1296.59	1120.82
4044.31	11877	110.454	1507.33	1408.61
4046.66	11874	-37.9705	1342.97	1392.54
4049.01	11887	-226.238	1246.02	1484.62
4051.36	11879	9.27547	1380.06	1382.31
4053.71	11881	-323.158	1347.06	1684.26
4056.06	11890	-93.2738	1511.52	1618.28
4058.41	11881	104.749	1885.55	1795.76
4060.76	11888	-180.756	1532.45	1727.61
4063.11	11885	-213.164	1789.62	2019.62
4065.47	11882	-130.808	1691.55	1837.67
4067.82	11885	-72.1745	1966.5	2055.81
4070.18	11893	-337.213	1805.05	2160.26
4072.53	11883	-94.4039	1923.3	2034.66
4074.89	11877	-485.987	1853.12	2358.77
4077.25	11883	-97.4819	2071.22	2186.93
4079.61	11894	182.894	2364.31	2199.75
4081.97	11886	-84.6438	2222.47	2326.5
4084.33	11881	-132.645	2173.2	2325.23
4086.69	11880	-329.242	2041.7	2390.87
4089.05	11876	-126.826	2365.7	2513.48
4091.41	11883	25.4416	2408.16	2402.74
4093.77	11886	-351.817	2145.84	2518.65
4096.13	11879	-117.586	2263.34	2400.94
4098.5	11886	-210.072	2412.39	2644.5
4100.86	11886	-81.9987	2390.38	2493.15
4103.23	11885	-190.773	2373.94	2586.26
4105.6	11876	-164.018	2478.27	2664.49
4107.96	11870	-28.2303	2670.58	2721.49
4110.33	11868	-25.8347	2477.22	2524.09
4112.7	11887	36.1686	2712.91	2699.23
4115.07	11882	-111.075	2589.8	2723.57
4117.44	11894	-171.317	2299.23	2491.31
4119.81	11886	59.8819	2585.36	2546.7
4122.18	11883	-141.806	2515.59	2679.73
4124.55	11894	-71.1316	2541.62	2634.71
4126.92	11888	-78.4062	2433.61	2533.12
4129.3	11881	-17.1423	2776.92	2817.54
4131.67	11895	-98.0445	2382.64	2501.53
4134.05	11881	2.40609	2714.84	2735.23
4136.42	11876	115.976	2658.97	2564.36
4138.8	11874	32.9372	2908.61	2899.84
4141.18	11875	193.986	2681.62	2508.54
4143.55	11882	100.435	2681.36	2602.61
4145.93	11897	-239.849	2366.05	2627.79
4148.31	11879	222.781	2497.09	2293.43
4150.69	11894	41.0737	2755.98	2737.73
4153.07	11880	197.143	2477.7	2299.73
4155.46	11880	-265.164	2605.17	2894.46
4157.84	11892	214.061	2639.97	2446.29
4160.22	11873	124.761	2655.98	2552.49
4162.6	11895	-163.488	2261.06	2444.93
4164.99	11889	205.435	2763.95	2580.02
4167.38	11888	-95.1655	2397.53	2513.64
4169.76	11888	-179.204	2259.03	2458.73
4172.15	11884	-200.907	2351.53	2573.89
4174.54	11872	-26.5367	2395.58	2442.47
4176.92	11890	-17.6919	2165.44	2201.48
4179.31	11893	302.861	2341.7	2055.98
4181.7	11883	-15.8688	2134.31	2168.25
4184.1	11865	247.888	2415.64	2185.97
4186.49	11874	223.153	2441.02	2236.5
4188.88	11880	-17.9844	1936.22	1970.62
4191.27	11886	-218.085	2090.03	2327.51
4193.67	11890	-267.751	1671.09	1955.14
4196.06	11888	-179.569	1954.25	2151.75
4198.46	11882	-55.7556	1685.44	1755.83
4200.85	11888	-166.645	1987.52	2172.26
4203.25	11882	126.885	1917.11	1805.27
4205.65	11877	155.225	1989.7	1849.89
4208.05	11886	-105.54	1616	1736.01
4210.44	11878	-20.1837	1844.84	1880.7
4212.84	11893	-222.66	1652.2	1890.62
4215.25	11887	130.741	1677.8	1560.06
4217.65	11877	-95.8703	1513.05	1622.44
4220.05	11883	143.741	1713.11	1582.56
4222.45	11884	-274.959	1292.14	1580.27
4224.86	11890	-224.969	1279.95	1517.57
4227.26	11889	153.567	1666.19	1525.33
4229.67	11884	-34.7291	1566.45	1614.64
4232.07	11882	-35.95	1420.31	1468.5
4234.48	11886	-124.71	1426.25	1563.99
4236.89	11891	-245.302	1108.06	1364.74
4239.3	11898	-203.331	1162.55	1377.36
4241.71	11893	137.102	1447.03	1320.94
4244.12	11884	132.371	1394.81	1273.05
4246.53	11902	-358.952	991.047	1361.34
4248.94	11891	279.557	1550.33	1281.45
4251.35	11891	13.9391	1213.42	1209.56
4253.76	11897	-333.966	1108.89	1454.98
4256.18	11891	35.8909	1275.02	1249.54
4258.59	11896	59.4792	1279.36	1230.13
4261.01	11903	251.009	1300.72	1058.53
4263.43	11889	-1.66266	1133.28	1144.48
4265.84	11889	96.7722	1102.36	1014.04
4268.26	11897	-270.106	1023.7	1304.68
4270.68	11904	18.3461	1180.73	1172.16
4273.1	11889	57.5759	1136.12	1087.61
4275.52	11901	116.366	1170.69	1063.18
4277.94	11894	167.694	1140.5	980.981
4280.36	11890	92.5006	1332.41	1250.33
4282.79	11884	-40.8452	955.984	1005.21
4285.21	11902	-7.82906	1049.67	1066.39
4287.63	11887	137.972	1025.27	894.75
4290.06	11893	34.2347	1063.25	1037.66
4292.49	11884	263.862	1025.02	767.55
4294.91	11892	-126.624	1014.05	1150.26
4297.34	11887	-634.153	677.859	1323.04
4299.77	11886	100.757	1281.91	1191.08
4302.2	11880	-123.946	1077.36	1211.4
4304.63	11899	-34.5072	1133.81	1178.14
4307.06	11890	-31.365	1140.86	1182.08
4309.49	11893	-80.2128	925.672	1014.34
4311.92	11885	181.752	1180.52	1007.16
4314.36	11889	94.0428	965.234	878.513
4316.79	11888	-22.6597	1075.08	1106.96
4319.23	11894	-261.483	704.406	974.006
4321.66	11896	-100.697	948.344	1057.86
4324.1	11896	116.323	995.156	886.219
4326.54	11898	83.0167	976.391	900.881
4328.97	11891	-34.9366	761.359	802.987
4331.41	11887	-88.8153	830.125	926.662
4333.85	11891	-88.6105	762.109	857.869
4336.29	11892	126.571	764.969	643.763
4338.74	11894	-31.7558	887.203	926.681
4341.18	11894	102.108	680.969	583.725
4343.62	11902	-127.594	787.219	922.5
4346.06	11893	49.8545	844.719	801.544
4348.51	11898	282.441	924.391	647.344
4350.96	11898	-50.4313	463.5	518.25
4353.4	11900	-116.146	510.891	632.306
4355.85	11893	-65.0175	819.078	891.525
4358.3	11898	-96.6787	602	704.55
4360.75	11908	95.3598	559.516	468.056
4363.2	11901	-14.1858	564.656	583.706
4365.65	11899	-193.278	400.625	598.894
4368.1	11899	-253.385	350.781	609.244
4370.55	11904	-137.561	571.734	715.256
4373	11896	-278.708	444.031	728.812
4375.46	11911	207.07	551.984	347.812
4377.91	11900	-141.141	314.406	459.375
4380.37	11901	21.5586	300	280.781
4382.82	11904	23.7248	451.734	431.606
4385.28	11898	-130.564	329.984	464.419
4387.74	11894	-266.729	78.5938	348.225
4390.2	11904	184.318	320.016	136.837
4392.66	11897	-96.7714	569.312	671.681
4395.12	11904	88.49	329.391	242.925
4397.58	11898	165.549	494.156	331.369
4400.04	11911	-69.2688	198.109	269.625
4402.51	11903	125.846	530.297	407.85
4404.97	11883	10.3167	442.938	436.256
4407.44	11889	25.6347	458.906	436.913
4409.9	11892	227.874	482.906	257.175
4412.37	11878	160.774	587.594	430.406
4414.84	11905	53.4292	386.016	335.381
4417.3	11908	-198.156	299.766	502.106
4419.77	11897	-29.1397	311.609	343.612
4422.24	11899	162.49	354.359	193.481
4424.71	11895	90.605	460.844	373.35
4427.19	11893	134.969	433.641	301.181
4429.66	11902	-3.76609	524.984	533.194
4432.13	11888	252	469.547	219.375
4434.61	11903	-174.535	183.859	361.406
4437.08	11904	-91.0987	314.766	409.275
4439.56	11913	-30.8467	381.953	416.269
4442.03	11897	31.6528	287.094	257.587
4444.51	11893	373.86	528.578	156.019
4446.99	11905	-4.92797	321.969	329.644
4449.47	11901	-106.842	41.4062	149.494
4451.95	11905	120.721	455.297	337.388
4454.43	11898	-125.731	262.562	391.556
4456.91	11904	33.7636	357.797	326.756
4459.4	11909	59.61	280.578	222.825
4461.88	11897	-157.79	0.703125	159.825
4464.37	11908	2.22344	343.047	343.688
4466.85	11905	32.9169	405.312	375.525
4469.34	11885	185.671	352.141	167.869
4471.82	11887	-46.0184	242.594	291.038
4474.31	11909	-33.6623	256.047	292.144
4476.8	11901	-30.9761	28.7656	60.2438
4479.29	11897	85.0222	218.562	134.663
4481.78	11906	181.247	175.688	-5.60625
4484.27	11897	-111.533	284.625	399.487
4486.77	11905	-50.8094	183.844	236.625
4489.26	11900	22.6769	358.703	338.85
4491.75	11894	108.907	257.062	149.4
4494.25	11893	227.218	524.234	299.513
4496.75	11886	-26.5997	177.969	206.288
4499.24	11895	-281.644	42.2031	326.569
4501.74	11901	-17.1769	130.234	148.65
4504.24	11888	-175.381	189.875	368.325
4506.74	11895	-158.007	215.281	376.425
4509.24	11899	31.9384	220.219	189.863
4511.74	11906	137.274	287.344	151.331
4514.24	11915	68.5911	372.469	306.431
4516.75	11896	241.868	300.141	58.7625
4519.25	11896	143.929	363.094	221.006
4521.76	11922	177.042	407.828	232.725
4524.26	11885	101.796	446.766	347.869
4526.77	11894	178.504	351.891	174.844
4529.28	11901	-134.099	321.578	459.506
4531.78	11906	342.025	317.797	-24.4312
4534.29	11887	303.101	518.547	217.256
4536.8	11892	-89.4183	-37.6719	52.1813
4539.31	11895	-77.403	131.609	210.769
4541.83	11906	-34.367	288.625	325.706
4544.34	11905	58.5198	379.578	323.756
4546.85	11903	-58.2253	226.594	287.212
4549.37	11902	4.81016	246.25	243.469
4551.88	11898	369.815	569.828	201.694
4554.4	11903	308.645	381.719	73.6875
4556.92	11902	22.7888	400.391	380.775
4559.44	11910	188.621	229.453	41.175
4561.96	11897	-144.815	244.297	392.381
4564.48	11900	66.6633	385.453	321.469
4567	11922	27.4233	192.703	166.669
4569.52	11899	210.589	399.297	190.294
4572.04	11902	28.6875	318.75	292.5
4574.57	11907	274.913	516.688	243.806
4577.09	11904	36.6453	33.4844	-3.1875
4579.62	11899	300.713	677.516	379.969
4582.14	11901	76.4198	212.656	137.381
4584.67	11911	165.132	252.969	88.575
4587.2	11916	-67.1266	289.688	359.812
4589.73	11903	-10.24	118.875	130.2
4592.26	11908	138.053	470.547	335.288
4594.79	11922	161.491	213.219	52.1625
4597.32	11934	72.7673	259.281	188.081
4599.86	11910	209.849	361.406	152.831
4602.39	11928	76.783	313.5	238.706
4604.92	11919	79.1019	121.719	42.975
4607.46	11909	116.139	204.031	88.6312
4610	11918	147.797	283.922	137.269
4612.53	11900	98.447	170.609	72.7688
4615.07	11911	-189.746	135.719	328.2
4617.61	11915	27.0519	283.125	258.225
4620.15	11911	-118.882	160.266	281.494
4622.69	11904	373.073	393.266	20.3625
4625.24	11910	210.87	351.531	141.844
[truncated: 2 more rows]

## Sheet: Fig. 3a
	Raman Int.
Raman shift	01:00:00	00:01:00.800000	00:01:01.500000	01:03:00	01:06:00	01:09:00	00:01:12.500000	00:01:15.500000
164.535	-43.7539	-43.2605	-41.9048	-33.9838	-29.2986	-42.8892	-27.5561	-42.2972
167.026	4864.92	4376.47	4373.67	4364.93	4049.92	4442.99	4001.05	4536.17
169.517	7541.04	6858.59	6888.54	6503.84	6275.79	7094.73	6098.99	6702.65
172.007	8189.97	7671.56	7665.54	7172.12	6740.53	7734.44	6619.54	7406.65
174.497	7525.05	7261.42	7292.49	6887.69	6419.4	7367.9	6213.3	7076.17
176.986	7041.5	6676.71	6580.43	6114.14	5673.53	6677.64	5826.19	6771.62
179.475	6421.47	5853.68	5832.89	5537.1	5121.61	6079	5062.64	5891.64
181.963	5847.05	5322.81	5483.48	5000.44	4762.13	5548.12	4719.12	5575.64
184.45	5044.27	4838.46	5048.67	4382.24	4322.19	5051.03	4235.53	4903.66
186.937	4824.08	4668.71	4471.45	4320.36	4212.86	4808.83	4139.71	4871.23
189.424	4150.4	4012.57	4190.66	4005.56	3865.51	4222.32	3863.6	4254.31
191.91	3784.09	3587.04	3725.69	3532.87	3519.37	3903.11	3486.94	3638.85
194.396	2957.98	3172.03	2996.3	3015.64	2930.25	3329.4	2963.62	3321.34
196.881	2508.84	2441.17	2489.72	2450.3	2308.42	2631.4	2449.95	2597.25
199.365	1970.44	1875.66	2054.79	1950.97	1868.66	2233.49	1813.29	2173.42
201.849	1477.5	1367.35	1558.81	1310.28	1325.67	1683.07	1418.83	1551.83
204.333	1033.74	1059.59	1243.31	926.217	1008.97	1114.69	978.022	1151.72
206.816	926.848	695.628	823.849	664.011	685.639	915.486	616.928	839.013
209.298	550.512	371.474	648.181	417.285	508.102	622.105	508.764	534.252
211.78	153.406	257.822	344.085	379.416	289.792	438.342	405.565	248.956
214.261	-23.7969	174.274	207.692	44.0495	199.07	287.644	132.075	31.036
216.742	138.57	74.888	62.361	-28.0443	-50.9527	185.432	56.0204	99.4815
219.222	-25.5859	0.865664	-49.8876	-5.8874	-6.92016	-51.3327	-60.7385	-46.5166
221.702	16.6445	20.8116	90.081	63.6948	55.4236	54.559	-3.74834	5.85457
224.182	139.414	-49.8357	24.2911	-23.0538	61.0494	95.0414	18.9336	46.5309
226.66	310.895	297.422	261.12	313.344	294.408	232.837	335.063	205.792
229.138	697.234	567.282	692.946	560.422	564.95	604.195	597.759	573.872
231.616	707.598	841.28	815.586	909.605	760.398	790.972	962.515	858.798
234.093	1051.13	1052.38	1159.74	1209.97	1178.11	1140.47	1194.44	1151.72
236.57	1443.97	1238.96	1295.92	1426.65	1334.93	1261.61	1387.44	1217.06
239.046	1552.26	1566.35	1503.76	1655.86	1647.5	1665.48	1805.06	1559.99
241.522	1726.11	1775.76	1857.32	1851	1751.97	1796.55	1952.34	1816.63
243.997	1931.62	1956.98	1958.64	2071.53	2064.2	1900.63	2171.39	1924.26
246.471	2069.88	2207.25	2223.61	2103.82	2296.27	2043.36	2360.86	2165.97
248.945	2300.95	2263.57	2432.86	2321.23	2370.03	2234.27	2492.75	2226.95
251.419	2219.88	2214.01	2300.78	2353.13	2243.77	2167.85	2476.81	2026.24
253.892	2256.68	2385.65	2203.17	2309.81	2269.43	2274.46	2431.04	2249.99
256.364	2017.37	2256.47	2112.32	2177.11	2241.86	2076.55	2275.62	1950.88
258.836	2020.91	1915.3	1892.69	1859.06	1829.71	1870.23	1956.9	1789.53
261.307	1765.25	1851	1669.77	1746.42	1754.99	1723.51	1865.31	1680.34
263.778	1467.35	1662.67	1468.13	1658.83	1612.59	1482.63	1653.05	1559.55
266.249	1616.11	1621.67	1408.62	1558.68	1602.36	1630.1	1703.3	1531.72
268.718	1172.44	1519.62	1385.64	1400.84	1483.32	1496.79	1494.01	1354.68
271.188	1378.23	1349.8	1357.53	1355.58	1322.29	1556.36	1467.28	1389.58
273.656	1055.35	1239.95	988.46	1022.87	1088.78	1215.26	1259.52	1101.2
276.124	849.672	940.127	836.548	828.454	804.739	875.914	940.764	732.383
278.592	726.039	734.086	659.881	654.506	524.008	751.137	691.058	565.053
281.059	409.293	451.552	295.081	330.575	288.277	416.797	340.022	346.074
283.526	306.277	382.059	103.129	117.901	170.385	259.558	247.807	158.987
285.992	208.82	143.678	76.9398	45.5956	55.4473	238.942	109.748	92.7987
288.457	256.75	305.644	108.564	67.6056	-1.1875	252.106	137.97	-1.90176
290.922	256.898	354.053	133.935	51.0524	49.7592	213.206	187.614	112.211
293.387	420.082	380.052	60.5021	116.887	63.0117	220.36	130.202	74.6271
295.851	447.125	405.912	190.716	245.784	160.814	299.23	300.338	106.31
298.314	509.848	489.58	313.441	279.807	286.811	383.498	362.558	174.34
300.777	496.059	588.567	434.677	417.562	361.083	437.087	486.401	362.28
303.239	601.57	706.038	647.435	436.806	464.832	569.436	596.434	400.603
305.701	764.184	839.331	674.349	698.135	529.53	682.723	662.41	467.505
308.162	859.695	942.63	730.844	831.5	802.052	827.158	866.301	751.184
310.623	1065.89	1171.79	969.204	1019.63	1006.38	923.174	1009.51	937.513
313.083	930.562	1004.55	928.012	945.902	972.141	920.794	1047.37	869.797
315.543	1096.46	1027.51	1027.49	919.11	895.25	910.537	1043.26	861.784
318.002	972.371	915.114	743.062	828.023	709.436	837.998	849.66	588.407
320.46	694.023	780.839	591.953	621.53	691.161	604.044	712.673	470.786
322.918	642.164	673.422	546.222	592.524	572.731	605.339	584.966	502.338
325.376	504.527	595.946	587.155	494.486	455.801	457.968	512.21	327.941
327.833	668.84	565.593	471.204	470.004	467.86	415.576	482.423	333.213
330.289	607.82	441.842	440.675	433.694	420.23	355.689	438.43	284.048
332.745	453.188	521.574	562.314	412.073	457.876	481.541	467.8	212.983
335.2	622.645	640.186	567.908	468.383	540.31	433.772	536.926	458.299
337.655	698.902	576.633	710.536	472.982	531.285	521.448	633.812	504.698
340.109	613.656	616.985	555.654	556.74	531.667	501.116	589.254	386.519
342.563	509.598	492.047	521.107	428.013	424.959	391.407	465.915	345.58
345.016	449.41	483.731	570.429	327.049	404.733	365.287	431.901	144.118
347.469	386.773	329.465	342.211	191.822	270.884	187.482	301.622	131.317
349.921	457.363	336.053	326.663	268.407	204.814	159.479	281.821	129.476
352.372	397.852	344.67	220.882	151.595	142.45	180.185	222.925	101.934
354.823	550.906	386.55	382.63	261.975	282.672	251.833	297.608	175.84
357.274	360.191	380.046	300.33	265.302	201.928	169.376	256.079	78.8394
359.723	315.359	272.558	235.491	202.24	238.168	202.166	293.934	68.2038
362.173	198.066	180.807	199.358	180.249	113.754	65.7686	159.408	37.2034
364.622	60.9648	114.43	146.968	23.729	83.0359	17.5613	117.526	24.7015
367.07	81.7031	78.9246	62.6196	13.8134	-0.154375	7.47141	-4.88691	35.9023
369.518	-67.0703	-77.0927	-76.3232	-35.9572	-45.6208	-52.9987	-28.6102	-24.1008
371.965	-33.7109	-10.3199	-9.91074	17.7796	-15.6127	-36.2619	-36.3806	-63.6609
374.411	119.098	68.8738	72.8973	-41.9751	-11.7622	30.1957	8.56361	22.7607
376.858	136.012	170.169	103.351	58.7631	11.1358	111.055	14.9678	85.6289
379.303	216.688	224.398	113.578	53.3161	32.2881	120.598	3.57947	116.455
381.748	339.773	310.135	284.313	186.857	167.693	242.744	156.281	368.834
384.192	474.918	373.973	348.142	264.519	217.954	353.974	201.694	398.388
386.636	517.766	499.465	434.211	316.876	313.512	428.417	275.842	536.96
389.08	741.961	588.376	521.501	488.071	343.122	624.78	438.118	677.779
391.523	1002.14	811.393	760.706	680.078	586.943	826.471	502.94	941.562
393.965	1242.93	971.509	955.239	908.438	772.605	1030.28	717.02	1283.4
396.407	1454.95	1241.89	1226.52	1124.39	1006.97	1362.13	957.654	1497.31
398.848	1733.8	1509.33	1515.78	1373.51	1293.55	1667.62	1203.64	1875.05
401.288	1960.09	1727.02	1728.82	1608.69	1563.61	1876.71	1468.49	2179.67
403.728	2424.37	2092.17	2174.88	2028.29	1891.33	2275.95	1756.55	2602.81
406.168	2791.21	2489.03	2484.09	2338.01	2134.23	2681.89	1973.21	2857.43
408.607	3139.14	2790.24	2709.25	2610.91	2396.84	2951.99	2260.98	3118.72
411.045	3209.66	2922.35	2949.35	2681.24	2576.18	3002.31	2425.67	3249.75
413.483	3316.24	2864.16	2829.8	2622.04	2482.6	3059.42	2343.82	3200.88
415.921	3201.32	2674.99	2757.54	2631.54	2334.55	2918.35	2162.45	2984.34
418.357	2978.3	2504.55	2446.45	2434.53	2188.58	2784.22	2050.16	2893.52
420.793	2593.56	2280.14	2200.25	2113.13	1997.84	2624.59	1804.83	2688.51
423.229	2509.45	2139.8	2141.64	1988.27	1796.8	2274.09	1634.31	2620.77
425.664	2440.28	1880.44	1915.94	1881.5	1708.82	2206.77	1473.34	2348.43
428.099	2407.34	2086.64	1995.39	1849.02	1750.84	2220.01	1515.32	2303.98
430.533	2514.91	2075.53	2006.78	1954.5	1731.54	2226.5	1657.63	2271.99
432.966	2417.22	1958.51	1909.49	1763.94	1716.47	2025.46	1591.26	2225.35
435.399	2073.5	1883.52	1775.34	1687.5	1537.84	1910.69	1473.57	2035.04
437.832	1899.95	1651.51	1723.07	1493.21	1267.23	1787.84	1291.61	1740.34
440.263	1854.73	1459.33	1424.81	1289.77	1182.96	1476.9	1145.7	1583.44
442.695	1655	1404.23	1415.84	1274.37	1111.1	1417.74	1073.3	1480.77
445.125	1498.91	1339.4	1318.99	1140.68	1020.6	1342.72	997.22	1454.25
447.555	1373.56	1145.41	1044.26	1038.27	902.45	1163.77	819.95	1227.35
449.985	1056.07	888.758	992.166	784.375	691.374	868.366	622.132	959.385
452.414	1015.53	843.406	785.472	717.242	557.7	840.267	460.823	811.496
454.843	831.012	679.913	565.165	564.737	404.982	580.584	332.162	674.537
457.27	742.594	633.215	602.348	544.867	440.764	561.251	358.689	583.139
459.698	696.34	574.717	580.61	463.138	329.199	592.7	382.61	623.791
462.125	607.305	498.645	524.647	452.371	294.545	492.283	295.899	529.894
464.551	344.531	351.917	446.82	296.35	230.461	387.935	161.488	338.787
466.977	238.066	171.914	182.394	227.254	168.919	281.593	105.839	335.328
469.402	221.949	191.895	121.795	178.328	87.9344	279.132	81.8341	260.182
471.826	32.2148	119.721	53.3105	92	39.995	70.0014	47.6001	117.92
474.25	191.895	88.2167	77.8392	127.794	133.837	160.748	89.6352	118.766
476.674	-2.97266	-8.8382	-4.00941	-3.16387	-0.6175	-3.61758	-3.57947	-8.45305
479.097	53.6445	85.0555	115.025	74.9217	21.2473	121.88	77.1595	42.0377
481.519	200.805	300.278	306.424	217.661	187.319	235.539	189.134	262.144
483.941	640.57	649.394	589.507	556.214	481.698	525.794	454.908	573.705
486.362	963	1062.79	886.58	906.122	819.313	816.94	803.163	888.54
488.783	881.145	1053.35	985.179	908.389	896.969	768.836	913.016	946.475
491.203	895.051	865.181	1021.65	916.272	771.712	894.349	754.401	817.663
493.622	961.75	937.44	846.657	735.263	705.77	787.803	673.865	813.387
496.041	929.273	1046.92	849.854	865.559	737.924	873.222	664.247	771.733
498.46	1008.63	1096.57	948.105	1025.79	903.15	877.839	905.714	1024.9
500.878	1149.82	1224.23	1216.89	1125.8	1000.06	968.62	1045.25	1176.18
503.295	972.859	1097.92	1016.34	1128.84	965.565	1098.96	1090.74	1085.46
505.712	977.715	971.667	1034.06	983.992	816.383	875.097	854.867	986.628
508.128	992.371	916.855	962.819	969.285	858.767	872.845	920.577	1103.57
510.543	1108.79	1123.56	1061.29	1094.72	949.053	1145.1	1071.72	1258.83
512.958	1151.93	1181.75	1260.93	1194.92	1068.96	1213.67	1213.96	1321.36
515.373	1215.72	1214.27	1309.12	1244.81	1079.37	1272.54	1174.34	1385.77
517.787	1395.12	1368	1371.35	1316.12	1205.17	1417.42	1256.75	1586.72
520.2	1580.03	1559.05	1578.45	1518.18	1273.03	1572.64	1341.27	1712.13
522.613	1572.36	1520.13	1433.69	1494.36	1364.18	1507.55	1425.88	1832.91
525.025	1442	1425.46	1649.22	1407.38	1327.28	1522.56	1281.89	1731.48
527.437	1338.84	1414.4	1373.3	1306.4	1151.6	1342.88	1199.4	1751.74
529.848	1483.71	1373.98	1420.46	1358.29	1279.33	1444.65	1201.86	1841.69
532.259	1653.5	1483.36	1499.5	1531.18	1328.06	1561.89	1271.49	1898.36
534.669	2052	1832.05	1986.01	1883.37	1631.28	1870.2	1701.59	2219.18
537.078	2432.05	2285.46	2324.64	2274.4	2060.4	2267.35	2114.74	2644.73
539.487	2532.44	2533.01	2530.62	2387.62	2307.46	2489.82	2354.24	2863.58
541.895	2051.95	2015.09	2029.29	1940.6	1747.51	2092.62	1918.18	2306.77
544.303	1238.3	1271.84	1437.96	1330.56	1154.81	1431.45	1194.12	1573.73
546.71	934.246	854.965	868.013	873.697	727.457	1092.59	819.157	1165.61
549.116	670.48	615.665	554.015	641.574	560.221	775.889	560.524	944.715
551.522	551.715	459.901	401.745	499.47	422.56	597.614	458.595	780.602
553.928	508.645	438.049	420.152	502.213	423.661	595.904	314.653	723.926
556.333	581.957	392.976	509.608	503.394	377.815	470.583	495.907	739.791
558.737	599.348	629.036	644.403	624.626	604.72	682.507	675.251	836.062
561.141	675.488	643.804	738.761	693.604	709.659	840.139	659.206	885.921
563.544	948.055	869.444	1033.38	1087.44	942.394	984.119	962.988	1079.21
565.946	1070.72	1078.25	1102.91	1223.84	1094.41	1257.76	1126.51	1204.47
568.349	1482.14	1308.95	1445.2	1355.48	1296.88	1304.15	1330.28	1396.01
570.75	1573.95	1650.88	1624.86	1562.18	1443.1	1461.26	1492.77	1437.8
573.151	1749.8	1773.38	1747.8	1731.71	1589	1583.82	1590.1	1597.9
575.551	1462.3	1564.09	1504.87	1502.15	1434.05	1542.32	1405.14	1373.59
577.951	862.055	918.064	846.422	982.501	857.811	965.3	984.713	953.726
580.35	322.637	425.913	388.035	356.075	300.725	394.781	358.6	260.537
582.749	142.633	152.83	118.52	113.446	23.8628	69.7528	39.2974	61.6241
585.147	-58.3906	4.6493	-63.4107	-45.5662	12.4064	-48.003	-25.9544	28.9387
587.544	-5.85547	-34.7789	15.8512	-20.3303	-34.9778	13.3777	-26.8217	-68.1896
589.941	183.387	-15.6241	37.739	51.421	81.9761	-15.056	48.3804	20.962
592.337	75.5508	62.0749	110.266	67.2338	-28.1556	66.4675	83.2259	41.8245
594.733	195.848	160.271	137.403	145.923	143.04	142.87	183.981	113.853
597.128	225.492	174.508	269.512	121.571	139.056	105.375	172.649	-2.05461
599.523	216.691	231.067	170.317	237.411	180.55	137.52	183.006	90.2002
601.917	215.648	204.741	279.699	168.037	230.532	171.476	208.001	141.523
604.31	222.574	279.914	304.496	180.888	271.774	224.457	237.315	142.17
606.703	289.66	329.708	371.961	436.529	300.723	384.871	358.861	253.46
609.095	367.117	350.095	449.193	452.563	470.384	347.371	470.617	386.466
611.487	517.137	473.979	556.406	592.459	633.561	602.295	716.171	561.459
613.878	660.914	697.323	825.467	870.631	976.692	926.821	955.494	937.03
616.268	1353.64	1343.1	1456.77	1664.73	1790.33	1623.54	1615.78	1772.77
618.658	2451.49	2469.5	2598.33	2730.31	2914.33	2865.25	2874.01	3091.65
621.048	3777.63	3767.03	3771.37	3787.85	3773.58	3794.05	3748.44	3778.24
623.437	2709.21	2853.64	2677.58	2615.59	2444.7	2642.31	2504.71	2482.27
625.825	969.344	1076.44	942.552	956.297	830.104	863.533	845.871	797.309
628.212	232.094	276.358	256.491	221.236	210.499	298.645	227.996	280.475
630.599	34.5391	89.8443	3.47102	4.69361	22.0756	-2.33051	11.8207	5.50977
632.986	27.7383	-18.474	99.6248	22.8646	2.73125	60.2118	-7.66811	2.54516
635.372	8.76562	123.187	74.5456	30.3046	58.33	20.7802	-7.3099	35.0954
637.757	288.684	322.432	252.467	124.764	82.5758	215.878	137.427	149.656
640.142	544.559	650.804	563.384	486.642	425.93	493.76	421.457	476.442
642.526	745.453	793.055	782.513	634.199	663.646	609.434	631.407	681.558
644.91	685.426	716.971	559.558	577.491	497.15	627.866	597.127	445.683
647.293	374.523	402.777	455.897	322.398	273.843	347.524	357.407	292.128
649.675	217.797	342.793	279.068	228.007	256.776	300.195	292.941	247.356
652.057	191.277	297.286	351.74	483.044	452.108	475.224	467.396	421.54
654.438	132.008	297.095	447.562	480.5	512.599	580.348	668.031	583.594
656.819	64.0234	281.753	396.4	495.1	523.441	496.551	675.548	576.158
659.199	57.3555	282.093	289.135	426.662	399.588	504.226	482.863	370.15
661.578	-3.96094	112.319	182.77	243.464	190.502	261.957	308.858	270.473
663.957	9.10547	130.274	61.9218	167.626	30.7652	82.2593	64.5636	100.626
666.336	36.6328	83.7587	-16.4136	49.6825	-8.88547	-12.157	72.9992	87.2391
668.714	-7.31641	-3.87766	76.3714	-18.5168	-0.59375	36.7024	-5.67496	15.5909
671.091	113.34	118.972	20.1343	107.487	-1.20828	2.82023	73.6159	32.2268
673.467	89.7422	127.93	137.689	209.944	39.5823	86.0639	89.6454	-12.0575
675.843	156.035	305.346	239.792	396.755	210.101	173.181	236.45	272.257
678.219	318.359	462.965	477.538	557.046	509.755	493.019	565.28	615.967
680.594	593.859	757.8	697.876	893.9	705.384	761.596	829.36	947.335
682.968	728.672	897.833	1064.99	1118.58	1138.39	1162.39	1177.53	1143.66
685.341	751.934	921.381	1204.81	1257.97	1409.92	1342.11	1422.59	1336.13
687.715	798.762	1136.5	1214.52	1601.97	1549.75	1526.42	1642.63	1556.7
690.087	838.281	982.23	1110.43	1324.08	1379.41	1389.09	1559.38	1409.65
692.459	669.602	902.719	881.118	1103.25	1039.61	1088.98	1178.85	1125.31
694.83	537.816	639.107	624.485	715.008	729.561	672.808	755.906	760.177
697.201	519.027	613.95	474.63	653.759	450.87	550.758	525.778	486.317
699.571	550.32	540.978	504.025	441.976	374.618	405.385	317.57	472.144
701.941	370.781	376.279	256.166	337.764	202.193	269.51	177.195	233.6
704.31	114.488	262.676	160.034	324.502	6.62625	124.917	40.5205	167.5
706.678	146.516	105.614	94.0543	122.546	43.3497	71.8323	8.4715	174.709
709.046	138.938	110.996	86.8115	165.333	56.3053	104.639	78.4823	135.156
711.413	183.824	234.066	278.529	349.402	210.484	208.269	224.409	345.551
713.78	268.246	318.843	373.615	501.14	397.269	481.684	346.091	501.094
716.146	312.277	378.662	335.191	662.374	461.688	561.424	539.211	600.01
718.511	279.977	416.903	499.832	588.502	634.838	535.731	544.435	646.893
720.876	251.414	397.09	316.293	601.901	571.74	576.005	558.966	654.51
723.24	239.648	328.404	373.691	650.847	531.596	611.72	572.357	745.741
725.604	334.734	392.655	525.802	631.847	601.098	649.83	567.614	665.811
727.967	386.727	518.507	616.373	710.272	714.157	715.562	640.39	798.749
730.329	882.684	762.43	750.191	963.805	828.252	863.737	811.668	927.077
732.691	1160.65	1180.9	1102.1	1266.39	1096.16	1065.38	1071.64	1233.7
735.052	1587.66	1522.44	1471.17	1532.04	1397.07	1369.01	1311.57	1524.78
737.413	2098.75	1987.1	1983.71	1977.85	1911.1	1794.77	1745	1876.73
739.773	2331.93	2290.18	2397.98	2278.16	2186.8	2098.83	2095.5	2303.16
742.133	2776.18	2631.69	2602.31	2699.32	2557.79	2369.96	2454.07	2544.68
744.492	2730.48	2857.2	2838.47	2993.25	2805.9	2726.55	2663.46	2906.96
746.85	3020.77	3028.89	2965.5	3231.71	3176.52	2961.87	3015.71	3169.66
749.208	3253.96	3335.9	3303.63	3594.09	3497.05	3254.73	3385.63	3618.41
751.565	4050.93	4022.1	3933.62	4267.29	4024.23	3899.19	3865.42	4182.97
753.921	5882.53	5738.9	5655.34	5641.09	5340.8	5091	5017.56	5493.76
756.277	9186.57	8803.13	8772	8677.17	8088.76	7751.63	7773.9	8293.09
758.633	12080.8	12270	11926.6	11693.6	11357.4	10774.5	11232.2	11276.6
760.987	11866.9	12338.6	12029.7	12194.1	11816	11377.3	11783.2	11432.8
763.341	8794.34	9093.92	9054.45	9076.94	8855.3	8644.09	8792.97	8744.82
765.695	5841.61	5861.18	5818.66	5913.58	5665.32	5513.9	5471.76	5648.04
[truncated: 1,751 more rows]

## Sheet: Fig. 3b
	Raman Int.
[truncated: 1,891 more rows]

## Sheet: Fig. 3c
	Ibiotin/Iavitin
[truncated: 9 more rows]

[truncated: 16 more sheets: Fig. 4a, Fig. 4b, Fig. 4c, Fig. 5b, Fig. S1, Fig. S2a, Fig. S2b, Fig. S3a, Fig. S3b, Fig. S4, Fig. S5, Fig. S6, Fig. S7, Fig. S8b, Fig. S8c, Fig. S9]
